# Supplementary material for: Genomic analysis of the prognostic effect of tumor-associated neutrophil-related genes across 15 solid cancer types: an immune perspective
Source: PubMed Central journal article supplement — Ann Transl Med. 2020 Nov;8(22):1507. doi: 10.21037/atm-20-6629 (PMC7729319; doi:10.21037/atm-20-6629), 2020-11
Supplement: atm-08-22-1507-supplementary.pdf [file atm-08-22-1507-supplementary.pdf]

| bcr_patient_bar code | Log 2 (FUT4) | Log 2 (MPO) | Log 2 (ELANE) | Tumor microenvironment immune type (based on FUT4 and ELANE) | Tumor microenvironment immune type (based on FUT4 and MPO) | CANCER TYPE | OS  | status | Number of somatic mutation | Number of predicted neoantigen |
|----------------------|--------------|-------------|---------------|--------------------------------------------------------------|------------------------------------------------------------|-------------|-----|--------|----------------------------|--------------------------------|
| TCGA-86-8585         | 9.26999344   | 3.8829149   | 2.0384432     | 1                                                            | 1                                                          | LUAD        | 12  | 0      | NA                         | NA                             |
| TCGA-50-5939         | 9.37380009   | 3.8586833   | 3.0286788     | 1                                                            | 1                                                          | LUAD        | 15  | 1      | 79                         | 15                             |
| TCGA-38-6178         | 9.11217383   | 3.8543658   | 1.7518022     | 1                                                            | 1                                                          | LUAD        | 15  | 0      | 62                         | 12                             |
| TCGA-91-6836         | 9.17091253   | 3.8340943   | -7.783092     | 1                                                            | 1                                                          | LUAD        | 14  | 0      | NA                         | 200                            |
| TCGA-97-7552         | 10.3815337   | 3.8277408   | 2.8234396     | 1                                                            | 1                                                          | LUAD        | 63  | 0      | 26                         | NA                             |
| TCGA-69-8254         | 10.140435    | 3.6442889   | 2.851757      | 1                                                            | 1                                                          | LUAD        | 13  | 0      | NA                         | NA                             |
| TCGA-NJ-A4YP         | 10.2723814   | 3.6357834   | 0.9385116     | 1                                                            | 1                                                          | LUAD        | 2   | 0      | NA                         | NA                             |
| TCGA-38-4631         | 9.06660443   | 3.603199    | -2.5431308    | 1                                                            | 1                                                          | LUAD        | 12  | 1      | 631                        | 100                            |
| TCGA-78-7166         | 9.2743789    | 3.5535989   | 1.844237      | 1                                                            | 1                                                          | LUAD        | 8   | 1      | 190                        | NA                             |
| TCGA-78-7536         | 10.207743    | 3.4896264   | -1.0467124    | 1                                                            | 1                                                          | LUAD        | 8   | 1      | 497                        | NA                             |
| TCGA-05-4402         | 9.6120387    | 3.449807    | 1.4455678     | 1                                                            | 1                                                          | LUAD        | 8   | 1      | 143                        | 36                             |
| TCGA-55-A48Y         | 10.8146904   | 3.4302184   | 0.3193173     | 1                                                            | 1                                                          | LUAD        | 21  | 0      | NA                         | NA                             |
| TCGA-44-6775         | 9.65209529   | 3.3775833   | 1.6446777     | 1                                                            | 1                                                          | LUAD        | 23  | 0      | 66                         | 28                             |
| TCGA-86-7713         | 9.71225618   | 3.2229143   | 0.0858597     | 1                                                            | 1                                                          | LUAD        | 38  | 0      | 140                        | NA                             |
| TCGA-05-4410         | 9.59127122   | 3.0310846   | -2.7829927    | 1                                                            | 1                                                          | LUAD        | 0   | 0      | 968                        | 90                             |
| TCGA-J2-A4AD         | 9.08347396   | 3.0270585   | -0.7397334    | 1                                                            | 1                                                          | LUAD        | 18  | 1      | NA                         | NA                             |
| TCGA-86-7701         | 9.36181842   | 2.9126154   | -2.3389071    | 1                                                            | 1                                                          | LUAD        | 31  | 0      | NA                         | NA                             |
| TCGA-55-6981         | 9.49174862   | 2.8868954   | 1.9351127     | 1                                                            | 1                                                          | LUAD        | 45  | 1      | 59                         | NA                             |
| TCGA-L4-A4E5         | 9.11084465   | 2.7891575   | 1.3597966     | 1                                                            | 1                                                          | LUAD        | 19  | 0      | NA                         | NA                             |
| TCGA-L9-A443         | 9.64718231   | 2.5941854   | -9.3712357    | 1                                                            | 1                                                          | LUAD        | 6   | 1      | NA                         | NA                             |
| TCGA-97-8175         | 9.97769049   | 2.3292183   | 1.0752519     | 1                                                            | 1                                                          | LUAD        | 18  | 0      | NA                         | NA                             |
| TCGA-05-4422         | 10.2477316   | 2.2572822   | -1.247868     | 1                                                            | 1                                                          | LUAD        | 12  | 0      | 48                         | 10                             |
| TCGA-44-6146         | 12.0955319   | -2.307787   | 2.9260013     | 1                                                            | 1                                                          | LUAD        | 24  | 0      | 39                         | 4                              |
| TCGA-55-6983         | 9.48697468   | 3.9256672   | 3.0927622     | 1                                                            | 1                                                          | LUAD        | 93  | 0      | 106                        | NA                             |
| TCGA-62-8398         | 10.5213372   | 3.9032282   | 0.6926414     | 1                                                            | 1                                                          | LUAD        | 15  | 1      | NA                         | NA                             |
| TCGA-05-4418         | 9.18450582   | 3.8137586   | 2.2787698     | 1                                                            | 1                                                          | LUAD        | 9   | 1      | 239                        | 43                             |
| TCGA-64-5775         | 10.6184476   | 3.7742368   | -4.095173     | 1                                                            | 1                                                          | LUAD        | 2   | 1      | 397                        | NA                             |
| TCGA-55-6982         | 9.39379837   | 3.7441234   | 2.769814      | 1                                                            | 1                                                          | LUAD        | 33  | 1      | 207                        | NA                             |
| TCGA-55-6984         | 11.072109    | 3.7121478   | 3.0493711     | 1                                                            | 1                                                          | LUAD        | 25  | 1      | NA                         | NA                             |
| TCGA-62-8394         | 11.1642504   | 3.5839631   | 0.7448414     | 1                                                            | 1                                                          | LUAD        | 5   | 1      | NA                         | NA                             |
| TCGA-78-7220         | 9.78618399   | 3.4938919   | 0.896977      | 1                                                            | 1                                                          | LUAD        | 27  | 1      | NA                         | NA                             |
| TCGA-55-7570         | 10.4205799   | 3.4159628   | 2.2907399     | 1                                                            | 1                                                          | LUAD        | 27  | 0      | NA                         | NA                             |
| TCGA-55-8203         | 9.54192156   | 3.3969075   | 1.5001035     | 1                                                            | 1                                                          | LUAD        | 18  | 0      | NA                         | NA                             |
| TCGA-69-7761         | 11.0144027   | 3.3772376   | 2.0580047     | 1                                                            | 1                                                          | LUAD        | 6   | 0      | 35                         | NA                             |
| TCGA-78-7540         | 11.5908946   | 3.3421835   | 1.9469404     | 1                                                            | 1                                                          | LUAD        | 39  | 1      | 26                         | NA                             |
| TCGA-86-8359         | 10.4250836   | 3.279605    | 2.8020215     | 1                                                            | 1                                                          | LUAD        | 15  | 1      | NA                         | NA                             |
| TCGA-78-7155         | 9.42731467   | 3.2690287   | -4.3634937    | 1                                                            | 1                                                          | LUAD        | 38  | 1      | 1320                       | NA                             |
| TCGA-05-4425         | 9.59127218   | 3.1840501   | 0.4544181     | 1                                                            | 1                                                          | LUAD        | 22  | 0      | 33                         | 6                              |
| TCGA-78-8662         | 10.044126    | 3.1002729   | -3.3249609    | 1                                                            | 1                                                          | LUAD        | 110 | 1      | NA                         | NA                             |
| TCGA-86-7711         | 9.77989386   | 3.045906    | 1.1356268     | 1                                                            | 1                                                          | LUAD        | 34  | 1      | NA                         | NA                             |
| TCGA-49-4490         | 9.46472266   | 3.03927     | 2.7264454     | 1                                                            | 1                                                          | LUAD        | 13  | 1      | 63                         | 18                             |
| TCGA-44-2666         | 10.6218995   | 3.0371379   | 1.4426198     | 1                                                            | 1                                                          | LUAD        | 3   | 1      | 53                         | 19                             |
| TCGA-05-4382         | 9.9414588    | 2.9798095   | 2.9799723     | 1                                                            | 1                                                          | LUAD        | 20  | 0      | 1282                       | 228                            |
| TCGA-78-7147         | 9.11865225   | 2.9770179   | 2.0882739     | 1                                                            | 1                                                          | LUAD        | 19  | 1      | 290                        | NA                             |
| TCGA-91-6840         | 9.33826765   | 2.8379997   | 1.5538618     | 1                                                            | 1                                                          | LUAD        | 12  | 0      | 108                        | NA                             |
| TCGA-49-AARN         | 9.1673985    | 2.8178913   | 2.0979883     | 1                                                            | 1                                                          | LUAD        | 37  | 1      | NA                         | NA                             |
| TCGA-62-A471         | 10.4921893   | 2.6173432   | 1.0354409     | 1                                                            | 1                                                          | LUAD        | 41  | 0      | NA                         | NA                             |
| TCGA-49-AARE         | 9.38497121   | 2.5697949   | 0.735938      | 1                                                            | 1                                                          | LUAD        | 40  | 1      | NA                         | NA                             |
| TCGA-78-7154         | 11.1918409   | 2.4982866   | 2.1788771     | 1                                                            | 1                                                          | LUAD        | 19  | 1      | 201                        | NA                             |
| TCGA-55-7725         | 9.66744166   | 2.4829773   | 1.0109159     | 1                                                            | 1                                                          | LUAD        | 15  | 0      | 113                        | NA                             |
| TCGA-78-7148         | 9.10260255   | 2.1818182   | 1.7708544     | 1                                                            | 1                                                          | LUAD        | 21  | 1      | 206                        | NA                             |

|              |            |           |            |   |   |      |       |     |     |     |
|--------------|------------|-----------|------------|---|---|------|-------|-----|-----|-----|
| TCGA-91-6847 | 9.08936038 | 1.7091362 | #NUM!      | 1 | 1 | LUAD | 28    | 0   | 73  | NA  |
| TCGA-62-A470 | 9.20244145 | 1.4135291 | 1.4137132  | 1 | 1 | LUAD | 39    | 1   | NA  | NA  |
| TCGA-49-AAR9 | 9.86948728 | 0.1549461 | -5.5288229 | 1 | 1 | LUAD | 9     | 1   | NA  | NA  |
| TCGA-62-A460 | 9.42610653 | 0.1133271 | 1.6826137  | 1 | 1 | LUAD | 48    | 1   | NA  | NA  |
| TCGA-05-4396 | 10.0421105 | -2.779026 | 0.8296629  | 1 | 1 | LUAD | 10    | 1   | 467 | NA  |
| TCGA-50-6590 | 10.1541475 | 3.9249445 | 2.2371231  | 1 | 1 | LUAD | 42    | 1   | NA  | 151 |
| TCGA-55-7576 | 9.52922522 | 3.8949235 | 1.7311354  | 1 | 1 | LUAD | 22    | 0   | 326 | NA  |
| TCGA-86-8056 | 11.6173296 | 3.3515336 | 2.2481128  | 1 | 1 | LUAD | 5     | 0   | NA  | NA  |
| TCGA-55-8092 | 9.27976571 | 3.1509382 | 3.1510843  | 1 | 1 | LUAD | 5     | 1   | NA  | NA  |
| TCGA-86-7955 | 9.8435074  | 2.1492008 | 3.0602152  | 1 | 1 | LUAD | 35    | 0   | NA  | NA  |
| TCGA-44-7670 | 10.3957706 | 2.1084308 | -0.917025  | 1 | 1 | LUAD | 29    | 0   | 930 | NA  |
| TCGA-50-5946 | 9.49926913 | 1.9451994 | #NUM!      | 1 | 1 | LUAD | 53    | 0   | NA  | 63  |
| TCGA-L9-A7SV | 11.0790801 | 0.9618233 | 2.420574   | 1 | 1 | LUAD | 19    | 0   | NA  | NA  |
| TCGA-49-4507 | 9.5201895  | 0.5534391 | 2.1818213  | 1 | 1 | LUAD | 9     | 1   | 183 | 27  |
| TCGA-IR-A3LB | #####      | #####     | #####      | 1 | 1 | CESC | 66.75 | 1.0 | 51  | 12  |
| TCGA-VS-A9U5 | #####      | #####     | #####      | 1 | 1 | CESC | 50.43 | 0.0 | NA  | NA  |
| TCGA-IR-A3LF | #####      | #####     | #####      | 1 | 1 | CESC | 96.88 | 0.0 | 75  | 10  |
| TCGA-VS-A9V5 | #####      | #####     | #####      | 1 | 1 | CESC | 16.23 | 1.0 | NA  | NA  |
| TCGA-FU-A40J | #####      | #####     | #####      | 1 | 1 | CESC | 13.99 | 0.0 | 171 | 35  |
| TCGA-DS-A7WI | #####      | #####     | #####      | 1 | 1 | CESC | 8.28  | 1.0 | 30  | 4   |
| TCGA-VS-A9UZ | #####      | #####     | #####      | 1 | 1 | CESC | 67.15 | 0.0 | NA  | NA  |
| TCGA-VS-A8QH | #####      | #####     | #####      | 1 | 1 | CESC | 39.75 | 1.0 | NA  | NA  |
| TCGA-DS-A7WF | #####      | #####     | #####      | 1 | 1 | CESC | 17.51 | 0.0 | 100 | 17  |
| TCGA-Q1-A5R1 | #####      | #####     | #####      | 1 | 1 | CESC | 15.57 | 0.0 | 49  | 11  |
| TCGA-C5-A2M2 | #####      | #NUM!     | #NUM!      | 1 | 1 | CESC | 33.21 | 1.0 | 60  | 16  |
| TCGA-UC-A7PI | #####      | #####     | #NUM!      | 1 | 1 | CESC | 69.45 | 0.0 | NA  | NA  |
| TCGA-EK-A2RL | #####      | #####     | #NUM!      | 1 | 1 | CESC | 47.73 | 1.0 | 25  | 7   |
| TCGA-C5-A1M9 | #####      | #####     | #NUM!      | 1 | 1 | CESC | 34.99 | 1.0 | 85  | 10  |
| TCGA-BH-A1EX | 9.17005    | 3.34839   | 0.86448    | 1 | 1 | BRCA | 49.5  | 1   | 13  | 13  |
| TCGA-AO-A0J5 | 8.69885    | 3.34004   | 1.95098    | 1 | 1 | BRCA | 26.0  | 1   | 47  | NA  |
| TCGA-BH-A1FE | 8.84513    | 3.28724   | 0.39688    | 1 | 1 | BRCA | 74.7  | 1   | 10  | 1   |
| TCGA-BH-A1FL | 8.90383    | 3.22135   | -0.63706   | 1 | 1 | BRCA | 55.0  | 1   | 20  | 5   |
| TCGA-B6-A0RS | 9.41960    | 3.18547   | 2.18379    | 1 | 1 | BRCA | 100.6 | 1   | NA  | 21  |
| TCGA-EW-A1P8 | 10.32220   | 3.18183   | 0.01490    | 1 | 1 | BRCA | 7.8   | 1   | 29  | 10  |
| TCGA-AQ-A0Y5 | 8.80736    | 2.98676   | 1.57106    | 1 | 1 | BRCA | 5.6   | 1   | 36  | NA  |
| TCGA-BH-A1FD | 8.70070    | 2.89014   | #NUM!      | 1 | 1 | BRCA | 33.2  | 1   | 22  | 3   |
| TCGA-B6-A0WS | 9.37524    | 2.87714   | 0.86363    | 1 | 1 | BRCA | 97.4  | 1   | 11  | 3   |
| TCGA-A2-A0CM | 8.78890    | 2.86932   | -4.50964   | 1 | 1 | BRCA | 24.8  | 1   | 46  | 9   |
| TCGA-BH-A1FU | 8.75405    | 2.77712   | 1.20740    | 1 | 1 | BRCA | 55.4  | 1   | 21  | 5   |
| TCGA-OL-A5D6 | 8.68778    | 2.71993   | 1.42183    | 1 | 1 | BRCA | 36.3  | 1   | 32  | NA  |
| TCGA-BH-A1EY | 9.25802    | 2.71591   | -4.01066   | 1 | 1 | BRCA | 17.7  | 1   | 29  | 7   |
| TCGA-BH-A1F2 | 8.88302    | 2.57713   | 0.74507    | 1 | 1 | BRCA | 31.5  | 1   | 33  | 3   |
| TCGA-A8-A09X | 8.89235    | 2.39831   | 0.09217    | 1 | 1 | BRCA | 14.0  | 1   | 47  | 12  |
| TCGA-B6-A0I9 | 9.07881    | 2.37697   | 0.77197    | 1 | 1 | BRCA | 11.9  | 1   | 55  | 8   |
| TCGA-BH-A208 | 10.16484   | 2.29679   | 1.31101    | 1 | 1 | BRCA | 57.8  | 1   | 45  | 7   |
| TCGA-AR-A0TY | 9.55771    | 2.20361   | #NUM!      | 1 | 1 | BRCA | 55.8  | 1   | 103 | 9   |
| TCGA-E9-A1RB | 8.87713    | 2.09858   | #NUM!      | 1 | 1 | BRCA | 32.1  | 1   | 19  | 8   |
| TCGA-AR-A0U2 | 8.95430    | 2.07046   | #NUM!      | 1 | 1 | BRCA | 83.8  | 1   | 46  | 11  |
| TCGA-BH-A1FR | 8.72665    | 2.00122   | -3.98211   | 1 | 1 | BRCA | 53.9  | 1   | 12  | 3   |
| TCGA-E9-A1NG | 9.14588    | 1.36420   | -0.26083   | 1 | 1 | BRCA | 25.8  | 1   | 15  | 4   |
| TCGA-E9-A1N6 | 8.90797    | 0.49468   | 0.49074    | 1 | 1 | BRCA | 22.3  | 1   | NA  | NA  |
| TCGA-BH-A1EN | 9.27090    | 0.19017   | -5.42911   | 1 | 1 | BRCA | 69.9  | 1   | 34  | 8   |
| TCGA-A8-A06U | 8.71557    | 0.12422   | -6.07048   | 1 | 1 | BRCA | 29.0  | 1   | 46  | 10  |
| TCGA-BH-A0BL | 9.18495    | 3.34735   | -0.61222   | 1 | 1 | BRCA | 74.8  | 0   | 87  | 10  |

|              |          |         |          |   |   |      |       |   |     |    |
|--------------|----------|---------|----------|---|---|------|-------|---|-----|----|
| TCGA-S3-AA14 | 8.76632  | 3.33910 | 0.63510  | 1 | 1 | BRCA | 17.4  | 0 | NA  | NA |
| TCGA-A2-A0YI | 8.78890  | 3.32230 | -0.49757 | 1 | 1 | BRCA | 49.4  | 0 | 9   | 3  |
| TCGA-AO-A12H | 8.81475  | 3.32003 | 2.18023  | 1 | 1 | BRCA | 40.5  | 0 | 16  | 6  |
| TCGA-A1-A0SP | 9.07770  | 3.30653 | -0.01940 | 1 | 1 | BRCA | 19.2  | 0 | 35  | 11 |
| TCGA-BH-A0DX | 9.38429  | 3.30496 | 1.98253  | 1 | 1 | BRCA | 70.8  | 0 | 55  | 11 |
| TCGA-A8-A095 | 8.74858  | 3.30390 | 1.41856  | 1 | 1 | BRCA | 42.0  | 0 | 90  | 22 |
| TCGA-AR-A1AQ | 9.74013  | 3.26324 | -3.74391 | 1 | 1 | BRCA | 99.2  | 0 | 37  | 9  |
| TCGA-BH-A0WE | 8.74902  | 3.25561 | 1.65521  | 1 | 1 | BRCA | 42.3  | 0 | 21  | 2  |
| TCGA-AO-A0JC | 9.45981  | 3.24663 | #NUM!    | 1 | 1 | BRCA | 50.8  | 0 | 7   | 0  |
| TCGA-E2-A574 | 10.64509 | 3.24463 | -3.81198 | 1 | 1 | BRCA | 38.7  | 0 | 84  | NA |
| TCGA-AR-A0TQ | 9.02693  | 3.22021 | 0.58301  | 1 | 1 | BRCA | 98.3  | 0 | NA  | 5  |
| TCGA-A2-A04X | 8.79791  | 3.21957 | -0.12992 | 1 | 1 | BRCA | 55.4  | 0 | 21  | 4  |
| TCGA-AN-A0XW | 8.86962  | 3.21736 | 1.05256  | 1 | 1 | BRCA | 5.6   | 0 | 168 | 64 |
| TCGA-E2-A1IH | 9.25422  | 3.20388 | #NUM!    | 1 | 1 | BRCA | 33.7  | 0 | 51  | 12 |
| TCGA-D8-A27M | 9.15434  | 3.20130 | -0.50349 | 1 | 1 | BRCA | 13.5  | 0 | 44  | 13 |
| TCGA-AR-A2LR | 8.82582  | 3.19815 | 0.24334  | 1 | 1 | BRCA | 57.2  | 0 | 49  | NA |
| TCGA-AC-A6IW | 9.79742  | 3.14465 | 0.80069  | 1 | 1 | BRCA | 13.6  | 0 | NA  | NA |
| TCGA-D8-A1JB | 8.72184  | 3.12549 | 1.13784  | 1 | 1 | BRCA | 55.4  | 0 | 21  | 6  |
| TCGA-E9-A22G | 9.03265  | 3.09106 | 0.73979  | 1 | 1 | BRCA | 40.7  | 0 | 74  | 12 |
| TCGA-BH-A0HA | 8.83069  | 3.04584 | 1.25908  | 1 | 1 | BRCA | 52.9  | 0 | 233 | 39 |
| TCGA-E9-A1N4 | 9.12767  | 3.04056 | -0.72669 | 1 | 1 | BRCA | 32.8  | 0 | 18  | 1  |
| TCGA-A8-A08R | 8.95216  | 3.01518 | #NUM!    | 1 | 1 | BRCA | 1.0   | 0 | 132 | 36 |
| TCGA-AR-A1AI | 11.02457 | 3.01018 | -9.40019 | 1 | 1 | BRCA | 108.3 | 0 | 50  | 15 |
| TCGA-E9-A1NA | 9.26249  | 2.99676 | 2.14729  | 1 | 1 | BRCA | 36.5  | 0 | 74  | 11 |
| TCGA-AO-A12F | 9.38763  | 2.97022 | 1.37286  | 1 | 1 | BRCA | 60.5  | 0 | 29  | 6  |
| TCGA-D8-A27K | 8.84752  | 2.95158 | 1.94477  | 1 | 1 | BRCA | 48.0  | 0 | 18  | 5  |
| TCGA-A2-A0T7 | 8.76822  | 2.93400 | 1.59633  | 1 | 1 | BRCA | 20.7  | 0 | 17  | 3  |
| TCGA-A1-A0SH | 9.03399  | 2.92362 | 0.14267  | 1 | 1 | BRCA | 47.2  | 0 | 73  | 20 |
| TCGA-D8-A1XQ | 10.03280 | 2.89571 | #NUM!    | 1 | 1 | BRCA | 16.4  | 0 | 569 | NA |
| TCGA-C8-A1HL | 8.69218  | 2.87269 | -3.46228 | 1 | 1 | BRCA | 10.4  | 0 | 22  | 8  |
| TCGA-A7-A26J | 8.73400  | 2.86952 | -0.59305 | 1 | 1 | BRCA | 20.6  | 0 | 166 | 3  |
| TCGA-B6-A0I2 | 8.72000  | 2.86474 | -4.53516 | 1 | 1 | BRCA | 143.3 | 0 | 41  | 6  |
| TCGA-OL-A97C | 8.88713  | 2.82976 | 0.94509  | 1 | 1 | BRCA | 8.9   | 0 | NA  | NA |
| TCGA-BH-A0BT | 9.06095  | 2.81890 | 0.01427  | 1 | 1 | BRCA | 77.7  | 0 | 28  | 8  |
| TCGA-GI-A2C9 | 9.87364  | 2.80730 | #NUM!    | 1 | 1 | BRCA | 109.8 | 0 | 105 | NA |
| TCGA-HN-A2NL | 8.90258  | 2.80276 | 0.78036  | 1 | 1 | BRCA | 2.6   | 0 | 56  | NA |
| TCGA-A8-A08Z | 9.16002  | 2.77909 | #NUM!    | 1 | 1 | BRCA | 40.0  | 0 | 23  | 4  |
| TCGA-A1-A0SO | 10.06288 | 2.75925 | #NUM!    | 1 | 1 | BRCA | 28.0  | 0 | NA  | 41 |
| TCGA-AR-A0TX | 9.04693  | 2.74322 | -0.07977 | 1 | 1 | BRCA | 64.8  | 0 | 221 | 62 |
| TCGA-AC-A2B8 | 8.98107  | 2.71823 | 0.93146  | 1 | 1 | BRCA | 22.2  | 0 | 72  | NA |
| TCGA-A2-A0T6 | 8.92618  | 2.71065 | 2.29837  | 1 | 1 | BRCA | 18.9  | 0 | 92  | 11 |
| TCGA-LL-A5YL | 8.76141  | 2.70032 | 1.12487  | 1 | 1 | BRCA | 17.0  | 0 | 55  | NA |
| TCGA-E2-A1L9 | 9.00350  | 2.65653 | 1.03383  | 1 | 1 | BRCA | 19.6  | 0 | 19  | 5  |
| TCGA-E9-A1RI | 8.74881  | 2.64201 | #NUM!    | 1 | 1 | BRCA | 47.6  | 0 | 12  | 2  |
| TCGA-BH-A0AV | 9.02811  | 2.62790 | -3.26534 | 1 | 1 | BRCA | 20.4  | 0 | 105 | 28 |
| TCGA-A2-A0YD | 9.05806  | 2.59910 | 1.36652  | 1 | 1 | BRCA | 25.3  | 0 | 43  | 14 |
| TCGA-A7-A2KD | 8.76814  | 2.58702 | -0.77073 | 1 | 1 | BRCA | 22.3  | 0 | 31  | NA |
| TCGA-C8-A12P | 9.72586  | 2.57069 | -4.73428 | 1 | 1 | BRCA | 11.8  | 0 | 114 | 30 |
| TCGA-GM-A2DF | 9.12820  | 2.56783 | 0.29346  | 1 | 1 | BRCA | 70.8  | 0 | 24  | NA |
| TCGA-D8-A142 | 10.53288 | 2.56563 | #NUM!    | 1 | 1 | BRCA | 14.0  | 0 | 42  | 12 |
| TCGA-AR-A24T | 8.75060  | 2.56142 | -0.31043 | 1 | 1 | BRCA | 105.2 | 0 | 21  | 5  |
| TCGA-BH-A0BF | 8.72927  | 2.55944 | -4.80591 | 1 | 1 | BRCA | 76.5  | 0 | 55  | 15 |
| TCGA-AN-A0XV | 8.77773  | 2.55444 | -0.31942 | 1 | 1 | BRCA | 5.3   | 0 | 24  | 8  |
| TCGA-EW-A1OZ | 8.68996  | 2.55229 | #NUM!    | 1 | 1 | BRCA | 40.4  | 0 | 44  | 10 |

|              |            |           |            |   |   |      |       |   |      |    |
|--------------|------------|-----------|------------|---|---|------|-------|---|------|----|
| TCGA-AN-A0AL | 9.55407    | 2.52927   | -5.01438   | 1 | 1 | BRCA | 7.5   | 0 | 65   | 7  |
| TCGA-BH-A0H3 | 8.97525    | 2.50454   | 2.28709    | 1 | 1 | BRCA | 63.3  | 0 | 13   | 4  |
| TCGA-A8-A096 | 8.72669    | 2.44902   | #NUM!      | 1 | 1 | BRCA | 0.0   | 0 | 25   | 6  |
| TCGA-GM-A2DL | 9.04612    | 2.42808   | 0.49802    | 1 | 1 | BRCA | 115.6 | 0 | 38   | NA |
| TCGA-A2-A0YJ | 9.68999    | 2.41380   | 1.43200    | 1 | 1 | BRCA | 18.6  | 0 | 46   | 16 |
| TCGA-BH-A0AZ | 8.75573    | 2.38710   | 0.45138    | 1 | 1 | BRCA | 63.0  | 0 | 43   | 11 |
| TCGA-AO-A0JA | 9.12557    | 2.28283   | #NUM!      | 1 | 1 | BRCA | 21.5  | 0 | 25   | 7  |
| TCGA-AR-A24Q | 9.04690    | 2.28251   | 0.66711    | 1 | 1 | BRCA | 104.2 | 0 | 99   | 14 |
| TCGA-D8-A1J8 | 9.46857    | 2.26117   | #NUM!      | 1 | 1 | BRCA | 14.2  | 0 | 574  | NA |
| TCGA-EW-A6S9 | 8.84776    | 2.24956   | #NUM!      | 1 | 1 | BRCA | 15.2  | 0 | NA   | NA |
| TCGA-AR-A1AH | 9.81376    | 2.21007   | #NUM!      | 1 | 1 | BRCA | 125.1 | 0 | 63   | 10 |
| TCGA-D8-A13Y | 8.77188    | 2.18465   | #NUM!      | 1 | 1 | BRCA | 56.8  | 0 | 55   | 16 |
| TCGA-C8-A1HK | 9.25531    | 2.15653   | -3.46101   | 1 | 1 | BRCA | 12.0  | 0 | 39   | 4  |
| TCGA-EW-A1IY | 9.10432    | 2.12782   | #NUM!      | 1 | 1 | BRCA | 8.5   | 0 | 18   | 6  |
| TCGA-A7-A4SE | 9.08058    | 2.12260   | 2.10705    | 1 | 1 | BRCA | 21.2  | 0 | 140  | NA |
| TCGA-A8-A07F | 8.69840    | 2.11153   | 1.51975    | 1 | 1 | BRCA | 19.0  | 0 | 24   | 3  |
| TCGA-B6-A0IJ | 8.88682    | 2.08253   | 0.74031    | 1 | 1 | BRCA | 233.4 | 0 | 113  | 24 |
| TCGA-AN-A0XN | 9.24227    | 2.08211   | 0.56389    | 1 | 1 | BRCA | 0.3   | 0 | 94   | 22 |
| TCGA-D8-A1J9 | 10.18123   | 2.08097   | #NUM!      | 1 | 1 | BRCA | 17.5  | 0 | 122  | 31 |
| TCGA-AN-A0FX | 9.24609    | 2.02315   | 2.02982    | 1 | 1 | BRCA | 0.3   | 0 | 128  | 25 |
| TCGA-D8-A1XW | 9.48617    | 1.97628   | #NUM!      | 1 | 1 | BRCA | 43.0  | 0 | 69   | 19 |
| TCGA-AN-A04C | 9.55977    | 1.96070   | #NUM!      | 1 | 1 | BRCA | 1.8   | 0 | 62   | 12 |
| TCGA-A8-A07I | 8.78283    | 1.89846   | -4.43347   | 1 | 1 | BRCA | 14.0  | 0 | 31   | 8  |
| TCGA-BH-A0AV | 9.29768    | 1.89073   | #NUM!      | 1 | 1 | BRCA | 59.8  | 0 | 45   | 7  |
| TCGA-C8-A135 | 9.00986    | 1.87840   | -4.53684   | 1 | 1 | BRCA | 12.9  | 0 | 39   | 6  |
| TCGA-D8-A27H | 9.63784    | 1.83924   | #NUM!      | 1 | 1 | BRCA | 13.0  | 0 | 93   | 22 |
| TCGA-BH-A0DK | 8.84216    | 1.82998   | 0.28159    | 1 | 1 | BRCA | 13.9  | 0 | 136  | 25 |
| TCGA-B6-A0RE | 10.80060   | 1.74639   | 0.18637    | 1 | 1 | BRCA | 255.5 | 0 | 80   | 31 |
| TCGA-AC-A7VC | 9.43280    | 1.74434   | -3.07412   | 1 | 1 | BRCA | 0.0   | 0 | NA   | NA |
| TCGA-A2-A04W | 9.50243    | 1.74286   | -3.07753   | 1 | 1 | BRCA | 101.9 | 0 | 83   | 13 |
| TCGA-E2-A1IK | 8.75338    | 1.72806   | 0.78754    | 1 | 1 | BRCA | 59.1  | 0 | 12   | 3  |
| TCGA-BH-A0BG | 9.29151    | 1.70985   | #NUM!      | 1 | 1 | BRCA | 61.5  | 0 | 29   | 8  |
| TCGA-AN-A04A | 8.77101    | 1.58443   | #NUM!      | 1 | 1 | BRCA | 3.0   | 0 | 21   | 7  |
| TCGA-AC-A2BK | 9.12759    | 1.57175   | #NUM!      | 1 | 1 | BRCA | 73.0  | 0 | 63   | NA |
| TCGA-AO-A129 | 9.66909    | 1.53500   | 1.53588    | 1 | 1 | BRCA | 108.0 | 0 | 68   | NA |
| TCGA-BH-A0EE | 8.82838    | 1.52494   | #NUM!      | 1 | 1 | BRCA | 31.0  | 0 | 65   | 13 |
| TCGA-AO-A12D | 8.84632    | 1.38871   | -4.15637   | 1 | 1 | BRCA | 82.6  | 0 | 31   | 4  |
| TCGA-D8-A1XO | 8.77896    | 1.18703   | -0.47586   | 1 | 1 | BRCA | 55.3  | 0 | 11   | 2  |
| TCGA-A8-A08B | 8.96738    | 1.15076   | -2.43964   | 1 | 1 | BRCA | 38.0  | 0 | 19   | 6  |
| TCGA-D8-A1JM | 11.34355   | 0.87378   | #NUM!      | 1 | 1 | BRCA | 19.4  | 0 | 27   | 7  |
| TCGA-GM-A3XL | 8.76226    | 0.77985   | 1.79927    | 1 | 1 | BRCA | 69.2  | 0 | 68   | NA |
| TCGA-AC-A7VB | 8.99474    | 0.69280   | 1.71996    | 1 | 1 | BRCA | 8.2   | 0 | NA   | NA |
| TCGA-D8-A1JJ | 8.98735    | 0.67843   | -0.36431   | 1 | 1 | BRCA | 20.1  | 0 | 51   | 11 |
| TCGA-C8-A1HM | 9.07815    | 0.48496   | 1.43143    | 1 | 1 | BRCA | 12.3  | 0 | 233  | 49 |
| TCGA-AR-A2LE | 8.81417    | 0.38994   | 0.38736    | 1 | 1 | BRCA | 166.3 | 0 | 233  | NA |
| TCGA-A1-A0SM | 8.97751    | -0.12926  | -0.12910   | 1 | 1 | BRCA | 8.0   | 0 | 23   | 7  |
| TCGA-D8-A1JA | 9.20097    | -0.33913  | -0.33933   | 1 | 1 | BRCA | 16.5  | 0 | 714  | NA |
| TCGA-BH-A18G | 9.65176    | -2.47001  | 1.00745    | 1 | 1 | BRCA | 4.9   | 0 | 1082 | NA |
| TCGA-A8-A09W | 9.74697    | -3.78131  | -3.93368   | 1 | 1 | BRCA | 1.0   | 0 | 61   | 12 |
| TCGA-L5-A8NM | 13.0196321 | 1.9912807 | -0.0105153 | 1 | 1 | ESCA | 7.75  | 1 | 1430 | NA |
| TCGA-L5-A4OH | 12.7121449 | 0.9941871 | #NUM!      | 1 | 1 | ESCA | 32.6  | 0 | 178  | NA |
| TCGA-L5-A4ON | 11.6884949 | 1.0831073 | -0.6086151 | 1 | 1 | ESCA | 18.3  | 1 | 138  | NA |
| TCGA-L5-A4OX | 12.1691466 | 1.48495   | -0.6450325 | 1 | 1 | ESCA | 7.42  | 1 | 123  | NA |
| TCGA-L5-A8NI | 11.4342748 | 2.6583484 | #NUM!      | 1 | 1 | ESCA | 13.5  | 1 | 183  | NA |

|              |            |           |            |   |   |      |       |     |     |     |
|--------------|------------|-----------|------------|---|---|------|-------|-----|-----|-----|
| TCGA-RE-A7BO | 13.3314937 | 2.7296848 | 0.4877358  | 1 | 1 | ESCA | 7     | 1   | 190 | NA  |
| TCGA-2H-A9GN | 13.1156029 | 2.7502346 | 0.7184317  | 1 | 1 | ESCA | 8.94  | 1   | 107 | NA  |
| TCGA-R6-A6XQ | 13.6259584 | 0.4106666 | -4.18692   | 1 | 1 | ESCA | 6.34  | 1   | 71  | NA  |
| TCGA-L5-A4OE | 14.1223613 | 0.9207223 | -0.0890553 | 1 | 1 | ESCA | 24    | 1   | 265 | NA  |
| TCGA-JY-A6FB | 14.0322315 | 0.1286337 | -5.977758  | 1 | 1 | ESCA | 60.4  | 0   | 85  | NA  |
| TCGA-R6-A8W8 | 12.5095123 | -0.063723 | -0.0634489 | 1 | 1 | ESCA | 2.89  | 1   | 119 | NA  |
| TCGA-2H-A9GI | 12.428906  | 2.8968788 | 0.1115786  | 1 | 1 | ESCA | 14.3  | 1   | 177 | NA  |
| TCGA-L7-A6VZ | 12.3238883 | -0.258592 | -0.257816  | 1 | 1 | ESCA | 10.4  | 0   | 102 | NA  |
| TCGA-M9-A5ME | 12.2662732 | 2.93875   | #NUM!      | 1 | 1 | ESCA | 33.1  | 0   | 76  | NA  |
| TCGA-R6-A8WC | 12.368032  | 0.6963675 | #NUM!      | 1 | 1 | ESCA | 2.3   | 0   | 127 | NA  |
| TCGA-VR-AA4D | 11.4513806 | 2.4296639 | -0.1951742 | 1 | 1 | ESCA | 46.2  | 1   | 88  | NA  |
| TCGA-L5-A4OG | 12.6094041 | 1.6597436 | 0.6340913  | 1 | 1 | ESCA | 4.7   | 0   | 155 | NA  |
| TCGA-CV-5979 | 8.97818047 | -1.081308 | #NUM!      | 1 | 1 | HNSC | 43.2  | 0.0 | 35  | 4   |
| TCGA-CQ-7065 | 7.52670893 | -0.130997 | #NUM!      | 1 | 1 | HNSC | 53.48 | 0.0 | 28  | 6   |
| TCGA-D6-A6EO | 8.16594911 | -0.703924 | #NUM!      | 1 | 1 | HNSC | 24.93 | 0.0 | NA  | NA  |
| TCGA-CX-7219 | 7.38067318 | -0.053344 | #NUM!      | 1 | 1 | HNSC | 34.33 | 0.0 | 116 | 31  |
| TCGA-DQ-7596 | 7.21152429 | -0.739854 | -1.7398539 | 1 | 1 | HNSC | 41.56 | 0.0 | NA  | NA  |
| TCGA-F7-A61W | 7.13786005 | -1.08467  | #NUM!      | 1 | 1 | HNSC | 0.46  | 0.0 | NA  | NA  |
| TCGA-CR-5243 | 7.60587505 | #NUM!     | #NUM!      | 1 | 1 | HNSC | 84.17 | 0.0 | 63  | 19  |
| TCGA-CQ-6218 | 7.38848232 | -0.240588 | #NUM!      | 1 | 1 | HNSC | 41.16 | 0.0 | 103 | 14  |
| TCGA-CR-6480 | 7.53672124 | #NUM!     | #NUM!      | 1 | 1 | HNSC | 11.89 | 0.0 | NA  | NA  |
| TCGA-DQ-7595 | 8.22554824 | -1.532407 | #NUM!      | 1 | 1 | HNSC | 00000 | 0.0 | NA  | NA  |
| TCGA-UF-A719 | 7.06538813 | -0.559792 | -1.5597919 | 1 | 1 | HNSC | 54.63 | 0.0 | NA  | NA  |
| TCGA-BA-5152 | 7.94201769 | -0.139713 | #NUM!      | 1 | 1 | HNSC | 42.31 | 0.0 | 435 | 120 |
| TCGA-UF-A7JK | 8.20238099 | 0.1527675 | #NUM!      | 1 | 1 | HNSC | 13.93 | 1.0 | NA  | NA  |
| TCGA-CR-6472 | 7.55560989 | #NUM!     | #NUM!      | 1 | 1 | HNSC | 34.49 | 0.0 | 406 | 67  |
| TCGA-CR-6467 | 7.97753924 | 0.0832474 | #NUM!      | 1 | 1 | HNSC | 58.38 | 0.0 | 36  | 9   |
| TCGA-CR-6491 | 7.62542247 | -1.039785 | #NUM!      | 1 | 1 | HNSC | 22.77 | 0.0 | 115 | 27  |
| TCGA-HD-7229 | 8.13171088 | #NUM!     | #NUM!      | 1 | 1 | HNSC | 33.74 | 0.0 | 144 | 33  |
| TCGA-IQ-7631 | 7.10598915 | -0.851521 | #NUM!      | 1 | 1 | HNSC | 38.5  | 0.0 | 24  | 4   |
| TCGA-CN-6992 | 7.54957369 | -0.784881 | #NUM!      | 1 | 1 | HNSC | 00000 | 0.0 | 289 | 52  |
| TCGA-BB-A6UC | 7.99580502 | -0.541828 | #NUM!      | 1 | 1 | HNSC | 00000 | 1.0 | NA  | NA  |
| TCGA-BA-6869 | 8.06840587 | -0.291062 | #NUM!      | 1 | 1 | HNSC | 21.16 | 0.0 | 397 | 34  |
| TCGA-BB-7872 | 7.09630297 | 0.2261386 | #NUM!      | 1 | 1 | HNSC | 99999 | 0.0 | NA  | NA  |
| TCGA-BB-7871 | 7.07427529 | 0.0229004 | #NUM!      | 1 | 1 | HNSC | 24.64 | 0.0 | NA  | NA  |
| TCGA-DQ-5629 | 7.23414394 | #NUM!     | #NUM!      | 1 | 1 | HNSC | 30.91 | 1.0 | 279 | NA  |
| TCGA-DQ-7588 | 7.16589586 | #NUM!     | #NUM!      | 1 | 1 | HNSC | 14.03 | 1.0 | 90  | 19  |
| TCGA-CR-7364 | 7.89406955 | #NUM!     | #NUM!      | 1 | 1 | HNSC | 47.14 | 0.0 | 384 | 58  |
| TCGA-CV-7424 | 7.50565676 | -0.115754 | #NUM!      | 1 | 1 | HNSC | 14.88 | 1.0 | 154 | 19  |
| TCGA-CN-6994 | 7.07451507 | 0.0521376 | #NUM!      | 1 | 1 | HNSC | 38.86 | 0.0 | 98  | 8   |
| TCGA-HD-7754 | 7.46610584 | -1.890573 | #NUM!      | 1 | 1 | HNSC | 25.72 | 0.0 | 51  | 12  |
| TCGA-QK-A6IG | 8.74906491 | #NUM!     | #NUM!      | 1 | 1 | HNSC | 7.29  | 1.0 | NA  | NA  |
| TCGA-CR-6493 | 7.51382706 | -1.377819 | #NUM!      | 1 | 1 | HNSC | 9.26  | 1.0 | 38  | 6   |
| TCGA-DQ-7589 | 7.57087349 | -1.818579 | -1.8185794 | 1 | 1 | HNSC | 46.29 | 0.0 | NA  | NA  |
| TCGA-QK-A6IJ | 7.25769332 | -0.503896 | #NUM!      | 1 | 1 | HNSC | 12.71 | 0.0 | NA  | NA  |
| TCGA-CR-5250 | 8.55134451 | #NUM!     | -1.3540217 | 1 | 1 | HNSC | 26.25 | 0.0 | 33  | 10  |
| TCGA-CR-7370 | 7.73325942 | 0.2197106 | #NUM!      | 1 | 1 | HNSC | 3.45  | 0.0 | 441 | 82  |
| TCGA-CQ-7069 | 8.26136626 | -0.621045 | #NUM!      | 1 | 1 | HNSC | 41.85 | 0.0 | NA  | NA  |
| TCGA-CV-A6JD | 8.85165348 | -0.192151 | #NUM!      | 1 | 1 | HNSC | 5.98  | 1.0 | NA  | NA  |
| TCGA-CQ-5332 | 7.98427148 | #NUM!     | -0.9663479 | 1 | 1 | HNSC | 10.41 | 1.0 | 123 | 21  |
| TCGA-HT-7482 | 7.2287     | #NUM!     | #NUM!      | 1 | 1 | LGG  | ####  | 0   | 12  | 4   |
| TCGA-S9-A6WC | 7.6670     | #NUM!     | #NUM!      | 1 | 1 | LGG  | 18.59 | 0   | NA  | NA  |
| TCGA-TQ-A7RW | 8.2068     | #NUM!     | #NUM!      | 1 | 1 | LGG  | 26.97 | 1   | NA  | NA  |
| TCGA-FG-6692 | 7.1444     | -1.5408   | -1.5408    | 1 | 1 | LGG  | 18.43 | 1   | 56  | 15  |

|              |         |         |          |   |   |      |       |   |      |     |
|--------------|---------|---------|----------|---|---|------|-------|---|------|-----|
| TCGA-HT-7676 | 7.9983  | -1.3212 | #NUM!    | 1 | 1 | LGG  | 0.16  | 0 | 12   | 2   |
| TCGA-VV-A86M | 7.5012  | -0.8417 | #NUM!    | 1 | 1 | LGG  | 16.00 | 0 | NA   | NA  |
| TCGA-DU-6406 | 7.6187  | -0.6843 | #NUM!    | 1 | 1 | LGG  | 16.82 | 1 | NA   | 1   |
| TCGA-FG-8182 | 8.0201  | -0.5462 | -1.5462  | 1 | 1 | LGG  | 13.67 | 0 | 19   | 7   |
| TCGA-TQ-A8XE | 7.7074  | -0.4499 | #NUM!    | 1 | 1 | LGG  | 31.34 | 1 | NA   | NA  |
| TCGA-FG-A87N | 7.3616  | -0.1691 | #NUM!    | 1 | 1 | LGG  | 18.63 | 0 | NA   | NA  |
| TCGA-E1-5303 | 7.1689  | -0.0499 | #NUM!    | 1 | 1 | LGG  | 67.41 | 1 | 24   | NA  |
| TCGA-CS-4943 | 7.6307  | -0.0318 | -1.6166  | 1 | 1 | LGG  | 36.33 | 1 | 22   | 14  |
| TCGA-HW-8322 | 7.2269  | 0.2243  | -1.7755  | 1 | 1 | LGG  | 24.90 | 0 | 16   | 9   |
| TCGA-DB-A4XD | 7.4145  | 0.5200  | #NUM!    | 1 | 1 | LGG  | 39.75 | 0 | 26   | 11  |
| TCGA-S9-A6TZ | 7.2848  | 0.5645  | -2.0203  | 1 | 1 | LGG  | 36.79 | 0 | NA   | NA  |
| TCGA-VM-A8C8 | 8.4447  | 0.6395  | #NUM!    | 1 | 1 | LGG  | 45.89 | 0 | NA   | NA  |
| TCGA-OR-A5LD | 7.5383  | #NUM!   | 2.0252   | 1 | 1 | ACC  | 39.32 | 1 | 60   | NA  |
| TCGA-OR-A5KX | 7.5201  | #NUM!   | 0.5200   | 1 | 1 | ACC  | 44.81 | 0 | 48   | NA  |
| TCGA-OR-A5JB | 7.2600  | #NUM!   | -0.1662  | 1 | 1 | ACC  | 18.10 | 1 | 265  | NA  |
| TCGA-OR-A5J7 | 7.6158  | -1.3180 | #NUM!    | 1 | 1 | ACC  | 16.10 | 1 | 61   | NA  |
| TCGA-OR-A5LE | 7.8223  | #NUM!   | #NUM!    | 1 | 1 | ACC  | 21.75 | 1 | 30   | NA  |
| TCGA-ER-A19Q | 9.24577 | 2.71741 | #NUM!    | 1 | 1 | SKCM | 51    | 1 | 101  | NA  |
| TCGA-EE-A3AF | 7.39176 | 2.71116 | #NUM!    | 1 | 1 | SKCM | 14    | 1 | 822  | NA  |
| TCGA-EE-A183 | 8.40539 | 2.69432 | #NUM!    | 1 | 1 | SKCM | 27    | 1 | 641  | NA  |
| TCGA-D3-A8GS | 7.65841 | 2.67859 | #NUM!    | 1 | 1 | SKCM | 117   | 1 | NA   | NA  |
| TCGA-EE-A29N | 8.29471 | 2.65627 | #NUM!    | 1 | 1 | SKCM | 19    | 1 | 504  | NA  |
| TCGA-ER-A198 | 7.19661 | 2.63120 | -1.82828 | 1 | 1 | SKCM | 51    | 1 | 386  | 68  |
| TCGA-EE-A3J3 | 7.70543 | 2.60684 | #NUM!    | 1 | 1 | SKCM | 172   | 1 | 135  | 18  |
| TCGA-EE-A2GN | 7.79613 | 2.59543 | -1.65245 | 1 | 1 | SKCM | 102   | 1 | 357  | NA  |
| TCGA-GN-A4U8 | 7.45864 | 2.59075 | #NUM!    | 1 | 1 | SKCM | 49    | 0 | 342  | NA  |
| TCGA-EE-A29V | 7.64619 | 2.58744 | -1.80490 | 1 | 1 | SKCM | 26    | 1 | 798  | 110 |
| TCGA-EE-A2M6 | 7.31038 | 2.53995 | #NUM!    | 1 | 1 | SKCM | 129   | 0 | 442  | NA  |
| TCGA-BF-AAP2 | 8.16542 | 2.52802 | #NUM!    | 1 | 1 | SKCM | 13    | 0 | NA   | NA  |
| TCGA-EE-A3AB | 7.31604 | 2.46354 | #NUM!    | 1 | 1 | SKCM | 123   | 0 | 551  | NA  |
| TCGA-EE-A3J5 | 7.46637 | 2.44679 | #NUM!    | 1 | 1 | SKCM | 37    | 1 | 1720 | 233 |
| TCGA-GN-A4U9 | 7.61682 | 2.44419 | #NUM!    | 1 | 1 | SKCM | 22    | 1 | 65   | NA  |
| TCGA-FS-A1ZP | 7.23353 | 2.41516 | #NUM!    | 1 | 1 | SKCM | 75    | 1 | 337  | NA  |
| TCGA-GN-A9SC | 7.96990 | 2.40588 | #NUM!    | 1 | 1 | SKCM | 59    | 1 | NA   | NA  |
| TCGA-EB-A5SG | 7.84102 | 2.39821 | #NUM!    | 1 | 1 | SKCM | 68    | 0 | 233  | NA  |
| TCGA-EE-A2M5 | 8.87697 | 2.38733 | #NUM!    | 1 | 1 | SKCM | 22    | 1 | 1581 | NA  |
| TCGA-EE-A3AE | 7.63211 | 2.35702 | #NUM!    | 1 | 1 | SKCM | 54    | 0 | 1136 | NA  |
| TCGA-DA-A1I5 | 8.05778 | 2.34261 | #NUM!    | 1 | 1 | SKCM | 135   | 0 | 361  | 56  |
| TCGA-D3-A5GN | 7.17453 | 2.34164 | #NUM!    | 1 | 1 | SKCM | 136   | 0 | 388  | NA  |
| TCGA-D3-A3C7 | 7.62670 | 2.34130 | #NUM!    | 1 | 1 | SKCM | 47    | 0 | 779  | NA  |
| TCGA-EE-A2M7 | 7.84660 | 2.33540 | #NUM!    | 1 | 1 | SKCM | 29    | 1 | 53   | NA  |
| TCGA-D3-A2JB | 7.90295 | 2.22648 | #NUM!    | 1 | 1 | SKCM | 168   | 1 | 19   | NA  |
| TCGA-D3-A3MV | 7.32496 | 2.21260 | #NUM!    | 1 | 1 | SKCM | 45    | 0 | 402  | 60  |
| TCGA-FR-A44A | 8.24257 | 2.13291 | #NUM!    | 1 | 1 | SKCM | 174   | 0 | 243  | NA  |
| TCGA-D3-A3C8 | 7.80846 | 2.12396 | #NUM!    | 1 | 1 | SKCM | 46    | 0 | 582  | 73  |
| TCGA-D3-A3CF | 7.88681 | 2.09146 | #NUM!    | 1 | 1 | SKCM | 25    | 1 | 30   | NA  |
| TCGA-FS-A1YX | 7.83127 | 2.08811 | #NUM!    | 1 | 1 | SKCM | 49    | 1 | 24   | 5   |
| TCGA-FS-A1ZM | 7.83556 | 2.07656 | #NUM!    | 1 | 1 | SKCM | 101   | 0 | 207  | 38  |
| TCGA-D3-A1Q1 | 7.29937 | 1.97812 | #NUM!    | 1 | 1 | SKCM | 17    | 1 | 50   | NA  |
| TCGA-XV-AAZV | 8.16854 | 1.95665 | #NUM!    | 1 | 1 | SKCM | 14    | 0 | NA   | NA  |
| TCGA-EE-A2MN | 7.38594 | 1.92201 | #NUM!    | 1 | 1 | SKCM | 48    | 1 | 117  | NA  |
| TCGA-EE-A2ME | 8.31729 | 1.90585 | #NUM!    | 1 | 1 | SKCM | 103   | 1 | 50   | NA  |
| TCGA-EE-A184 | 7.85572 | 1.90238 | #NUM!    | 1 | 1 | SKCM | 68    | 1 | 234  | 60  |
| TCGA-D3-A8GV | 8.01445 | 1.89712 | -1.56235 | 1 | 1 | SKCM | 107   | 1 | NA   | NA  |

|              |         |         |          |   |   |      |      |   |       |      |
|--------------|---------|---------|----------|---|---|------|------|---|-------|------|
| TCGA-EE-A2A6 | 7.39896 | 1.87255 | -1.58684 | 1 | 1 | SKCM | 86   | 0 | 245   | NA   |
| TCGA-3N-A9WC | 7.53517 | 1.85336 | #NUM!    | 1 | 1 | SKCM | 66   | 0 | NA    | NA   |
| TCGA-ER-A19C | 7.16076 | 1.84246 | #NUM!    | 1 | 1 | SKCM | 49   | 1 | 69    | NA   |
| TCGA-ER-A19E | 8.43935 | 1.84109 | #NUM!    | 1 | 1 | SKCM | 13   | 1 | 376   | NA   |
| TCGA-EB-A6QZ | 7.65074 | 1.80546 | #NUM!    | 1 | 1 | SKCM | 12   | 1 | 226   | NA   |
| TCGA-ER-A19H | 7.79819 | 1.78981 | #NUM!    | 1 | 1 | SKCM | 152  | 1 | 210   | 34   |
| TCGA-RP-A690 | 7.56854 | 1.78731 | #NUM!    | 1 | 1 | SKCM | 0    | 0 | 15    | NA   |
| TCGA-EE-A2MR | 8.45668 | 1.76939 | -1.81553 | 1 | 1 | SKCM | 134  | 0 | 3844  | NA   |
| TCGA-BF-A1PZ | 7.66599 | 1.74893 | #NUM!    | 1 | 1 | SKCM | 28   | 0 | 215   | 35   |
| TCGA-EB-A5VU | 7.64639 | 1.74433 | #NUM!    | 1 | 1 | SKCM | 11   | 1 | 50    | NA   |
| TCGA-D9-A4Z2 | 7.77756 | 1.73552 | -1.58641 | 1 | 1 | SKCM | 6    | 1 | 23    | NA   |
| TCGA-D3-A8GQ | 7.78868 | 1.71348 | #NUM!    | 1 | 1 | SKCM | 29   | 1 | NA    | NA   |
| TCGA-EE-A2GS | 8.16909 | 1.70669 | #NUM!    | 1 | 1 | SKCM | 81   | 1 | 281   | NA   |
| TCGA-W3-AA1C | 7.97610 | 1.67933 | #NUM!    | 1 | 1 | SKCM | 4    | 1 | NA    | NA   |
| TCGA-D9-A149 | 7.64437 | 1.67157 | #NUM!    | 1 | 1 | SKCM | 55   | 0 | 190   | 29   |
| TCGA-EE-A20B | 7.78950 | 1.62274 | #NUM!    | 1 | 1 | SKCM | 134  | 0 | 148   | 20   |
| TCGA-EB-A3XC | 7.83758 | 1.62223 | #NUM!    | 1 | 1 | SKCM | 21   | 0 | 317   | NA   |
| TCGA-D3-A2JF | 7.58470 | 1.60383 | #NUM!    | 1 | 1 | SKCM | 62   | 0 | 1164  | 133  |
| TCGA-FS-A1ZC | 7.93973 | 1.59206 | #NUM!    | 1 | 1 | SKCM | 357  | 1 | 551   | 58   |
| TCGA-FS-A1ZA | 7.33813 | 1.58410 | #NUM!    | 1 | 1 | SKCM | 28   | 1 | 967   | 146  |
| TCGA-FR-A7U8 | 7.88315 | 1.57488 | #NUM!    | 1 | 1 | SKCM | 28   | 0 | NA    | NA   |
| TCGA-EE-A2A0 | 8.35709 | 1.56793 | #NUM!    | 1 | 1 | SKCM | 47   | 1 | 345   | NA   |
| TCGA-EB-A41B | 7.90300 | 1.50802 | #NUM!    | 1 | 1 | SKCM | 10   | 0 | 322   | NA   |
| TCGA-YG-AA3C | 7.19324 | 1.43499 | -1.56490 | 1 | 1 | SKCM | 38   | 1 | NA    | NA   |
| TCGA-YD-A9TB | 7.22446 | 1.41197 | #NUM!    | 1 | 1 | SKCM | #### | 0 | NA    | NA   |
| TCGA-GF-A3OT | 8.82960 | 1.40833 | #NUM!    | 1 | 1 | SKCM | 10   | 0 | 426   | NA   |
| TCGA-D3-A1Q3 | 7.36515 | 1.39830 | #NUM!    | 1 | 1 | SKCM | 17   | 1 | 42    | NA   |
| TCGA-D3-A2J7 | 7.21170 | 1.34903 | #NUM!    | 1 | 1 | SKCM | 103  | 1 | 294   | NA   |
| TCGA-BF-AAP6 | 8.90490 | 1.34647 | #NUM!    | 1 | 1 | SKCM | 11   | 0 | NA    | NA   |
| TCGA-EE-A2GM | 7.30004 | 1.34608 | #NUM!    | 1 | 1 | SKCM | 75   | 0 | 573   | 59   |
| TCGA-EE-A20F | 8.24121 | 1.32256 | #NUM!    | 1 | 1 | SKCM | 91   | 0 | 384   | NA   |
| TCGA-EB-A3XF | 7.48862 | 1.28895 | #NUM!    | 1 | 1 | SKCM | 9    | 0 | 318   | NA   |
| TCGA-HR-A2OC | 8.23905 | 1.26796 | #NUM!    | 1 | 1 | SKCM | 0    | 0 | #N/A  | #N/A |
| TCGA-QB-AA9C | 7.81468 | 1.25496 | #NUM!    | 1 | 1 | SKCM | 18   | 1 | NA    | NA   |
| TCGA-EE-A2GJ | 7.90406 | 1.25217 | #NUM!    | 1 | 1 | SKCM | 107  | 1 | 882   | NA   |
| TCGA-Z2-AA3S | 8.16799 | 1.20414 | #NUM!    | 1 | 1 | SKCM | 97   | 0 | NA    | NA   |
| TCGA-DA-A1I8 | 7.78903 | 1.11995 | #NUM!    | 1 | 1 | SKCM | 54   | 1 | 138   | 24   |
| TCGA-D3-A2JE | 7.40571 | 1.03358 | #NUM!    | 1 | 1 | SKCM | 28   | 1 | NA    | NA   |
| TCGA-FR-A3YN | 7.53085 | 1.02623 | -1.78091 | 1 | 1 | SKCM | 93   | 0 | 455   | NA   |
| TCGA-ER-A19F | 7.37319 | 0.97424 | #NUM!    | 1 | 1 | SKCM | 26   | 1 | 791   | NA   |
| TCGA-FR-A8YD | 7.44401 | 0.82538 | #NUM!    | 1 | 1 | SKCM | 36   | 1 | NA    | NA   |
| TCGA-D3-A3C3 | 7.77710 | 0.81361 | #NUM!    | 1 | 1 | SKCM | #### | 0 | 216   | NA   |
| TCGA-BF-A5EP | 7.61202 | 0.81114 | #NUM!    | 1 | 1 | SKCM | 11   | 0 | 140   | NA   |
| TCGA-DA-A1HY | 8.24946 | 0.79768 | #NUM!    | 1 | 1 | SKCM | 145  | 0 | 587   | NA   |
| TCGA-FS-A1Z0 | 8.00077 | 0.77594 | #NUM!    | 1 | 1 | SKCM | 202  | 1 | 222   | 57   |
| TCGA-FW-A3R5 | 7.61727 | 0.75343 | -1.56832 | 1 | 1 | SKCM | 37   | 0 | 30924 | NA   |
| TCGA-EE-A181 | 7.75788 | 0.75146 | #NUM!    | 1 | 1 | SKCM | 34   | 1 | 2416  | NA   |
| TCGA-EB-A5FP | 8.20165 | 0.73266 | #NUM!    | 1 | 1 | SKCM | 15   | 1 | 321   | NA   |
| TCGA-GN-A4U7 | 7.89180 | 0.60331 | #NUM!    | 1 | 1 | SKCM | 10   | 1 | 210   | NA   |
| TCGA-EE-A3JD | 8.17531 | 0.57560 | #NUM!    | 1 | 1 | SKCM | 27   | 1 | 2399  | NA   |
| TCGA-GN-A26D | 8.43010 | 0.57124 | #NUM!    | 1 | 1 | SKCM | 48   | 1 | 49    | NA   |
| TCGA-FS-A1ZY | 7.36430 | 0.56667 | #NUM!    | 1 | 1 | SKCM | 27   | 1 | 29    | NA   |
| TCGA-EE-A3AC | 8.13910 | 0.51389 | #NUM!    | 1 | 1 | SKCM | 64   | 0 | 798   | NA   |
| TCGA-EE-A20I | 7.68826 | 0.46352 | #NUM!    | 1 | 1 | SKCM | 14   | 1 | 18    | 5    |

|              |          |          |          |   |   |      |       |     |      |     |
|--------------|----------|----------|----------|---|---|------|-------|-----|------|-----|
| TCGA-D3-A2JA | 8.50173  | 0.43445  | #NUM!    | 1 | 1 | SKCM | 115   | 0   | 293  | 47  |
| TCGA-EB-A431 | 7.22919  | 0.38394  | #NUM!    | 1 | 1 | SKCM | 19    | 0   | 1360 | NA  |
| TCGA-GN-A8LN | 7.75445  | 0.35411  | #NUM!    | 1 | 1 | SKCM | 25    | 0   | NA   | NA  |
| TCGA-EE-A180 | 7.24485  | 0.27751  | -1.72261 | 1 | 1 | SKCM | 95    | 1   | 438  | 60  |
| TCGA-3N-A9WE | 7.83665  | 0.27691  | #NUM!    | 1 | 1 | SKCM | 17    | 1   | NA   | NA  |
| TCGA-EE-A29D | 7.50333  | 0.23597  | #NUM!    | 1 | 1 | SKCM | 14    | 1   | 2976 | NA  |
| TCGA-DA-A1I2 | 7.58701  | 0.22503  | #NUM!    | 1 | 1 | SKCM | 176   | 1   | 102  | NA  |
| TCGA-EB-A42Y | 7.59212  | 0.18612  | #NUM!    | 1 | 1 | SKCM | 24    | 1   | 69   | NA  |
| TCGA-EE-A2MF | 7.99744  | 0.18078  | #NUM!    | 1 | 1 | SKCM | 269   | 1   | 612  | NA  |
| TCGA-D9-A3Z1 | 7.19248  | 0.11036  | #NUM!    | 1 | 1 | SKCM | 15    | 1   | 404  | NA  |
| TCGA-FS-A1ZS | 8.26509  | 0.07245  | #NUM!    | 1 | 1 | SKCM | 149   | 0   | 217  | NA  |
| TCGA-ER-A19K | 7.93036  | 0.02574  | #NUM!    | 1 | 1 | SKCM | 15    | 1   | 299  | 33  |
| TCGA-GN-A26C | 7.77992  | 0.01892  | #NUM!    | 1 | 1 | SKCM | 27    | 1   | 1488 | 176 |
| TCGA-D3-A5GC | 7.44186  | -0.17609 | #NUM!    | 1 | 1 | SKCM | 138   | 0   | 1262 | NA  |
| TCGA-FS-A1Z3 | 8.18772  | -0.24811 | -1.83290 | 1 | 1 | SKCM | 21    | 1   | 835  | 84  |
| TCGA-D3-A5GL | 7.73115  | -0.29672 | #NUM!    | 1 | 1 | SKCM | 126   | 0   | 360  | NA  |
| TCGA-EB-A44O | 7.38885  | -0.35199 | #NUM!    | 1 | 1 | SKCM | 3     | 0   | 396  | NA  |
| TCGA-EB-A6QY | 7.50697  | -0.40583 | #NUM!    | 1 | 1 | SKCM | 13    | 0   | 490  | NA  |
| TCGA-FS-A1ZD | 8.89706  | -0.55173 | -1.55173 | 1 | 1 | SKCM | 53    | 1   | 219  | NA  |
| TCGA-DA-A95X | 7.71400  | -0.61220 | #NUM!    | 1 | 1 | SKCM | 74    | 0   | NA   | NA  |
| TCGA-D3-A51N | 7.61227  | -0.67185 | #NUM!    | 1 | 1 | SKCM | 23    | 0   | 92   | NA  |
| TCGA-OD-A75X | 7.16381  | -0.68108 | -1.68131 | 1 | 1 | SKCM | 298   | 1   | 829  | NA  |
| TCGA-EE-A2MV | 8.27675  | -0.74251 | #NUM!    | 1 | 1 | SKCM | 168   | 1   | 441  | NA  |
| TCGA-ER-A2NE | 7.55863  | -0.74275 | -1.74275 | 1 | 1 | SKCM | 20    | 1   | 119  | NA  |
| TCGA-DA-A3F3 | 8.09463  | -0.79336 | #NUM!    | 1 | 1 | SKCM | 10    | 1   | 262  | NA  |
| TCGA-D3-A8GK | 8.16410  | -0.96917 | #NUM!    | 1 | 1 | SKCM | 170   | 0   | NA   | NA  |
| TCGA-EB-A44P | 7.48847  | -1.20091 | #NUM!    | 1 | 1 | SKCM | 24    | 0   | 263  | NA  |
| TCGA-D3-A8GE | 8.57275  | -1.27056 | #NUM!    | 1 | 1 | SKCM | 26    | 0   | NA   | NA  |
| TCGA-D3-A8GL | 7.25076  | -1.28455 | #NUM!    | 1 | 1 | SKCM | 89    | 1   | NA   | NA  |
| TCGA-WE-A8ZF | 7.34190  | -1.46793 | #NUM!    | 1 | 1 | SKCM | 9     | 1   | NA   | NA  |
| TCGA-ER-A2NF | 7.66459  | -1.47714 | #NUM!    | 1 | 1 | SKCM | 29    | 1   | 29   | NA  |
| TCGA-DA-A1I7 | 7.64386  | -1.54835 | #NUM!    | 1 | 1 | SKCM | 89    | 0   | 372  | 41  |
| TCGA-EE-A20C | 7.64321  | -1.59466 | #NUM!    | 1 | 1 | SKCM | 151   | 1   | 1633 | 266 |
| TCGA-GN-A268 | 7.23445  | -1.66658 | #NUM!    | 1 | 1 | SKCM | 63    | 1   | 283  | NA  |
| TCGA-FS-A1ZN | 7.23808  | -1.72786 | #NUM!    | 1 | 1 | SKCM | 24    | 1   | 86   | 15  |
| TCGA-EE-A2MD | 7.15487  | -1.74565 | #NUM!    | 1 | 1 | SKCM | 47    | 1   | 1332 | NA  |
| TCGA-EE-A2MI | 7.98328  | -1.74565 | #NUM!    | 1 | 1 | SKCM | 204   | 1   | 857  | NA  |
| TCGA-EB-A24C | 7.29998  | -1.81046 | #NUM!    | 1 | 1 | SKCM | 21    | 0   | 27   | 8   |
| TCGA-D9-A148 | 7.84957  | -1.81553 | #NUM!    | 1 | 1 | SKCM | 151   | 0   | 228  | NA  |
| TCGA-ER-A2ND | 7.26690  | #NUM!    | #NUM!    | 1 | 1 | SKCM | 23    | 1   | 95   | NA  |
| TCGA-BF-A1PV | 7.33702  | #NUM!    | #NUM!    | 1 | 1 | SKCM | 0     | 0   | 251  | 40  |
| TCGA-D9-A1X3 | 7.36011  | #NUM!    | #NUM!    | 1 | 1 | SKCM | 18    | 0   | NA   | 17  |
| TCGA-D3-A3ML | 7.46872  | #NUM!    | #NUM!    | 1 | 1 | SKCM | 14    | 1   | 728  | NA  |
| TCGA-ER-A19T | 7.50004  | #NUM!    | #NUM!    | 1 | 1 | SKCM | 9     | 1   | 55   | NA  |
| TCGA-D9-A6EA | 7.59704  | #NUM!    | #NUM!    | 1 | 1 | SKCM | 25    | 0   | 534  | NA  |
| TCGA-ER-A3PL | 7.63047  | #NUM!    | #NUM!    | 1 | 1 | SKCM | 33    | 0   | 292  | NA  |
| TCGA-EE-A185 | 7.85482  | #NUM!    | #NUM!    | 1 | 1 | SKCM | 5     | 1   | 160  | NA  |
| TCGA-D3-A51G | 8.03758  | #NUM!    | #NUM!    | 1 | 1 | SKCM | ####  | 0   | 950  | NA  |
| TCGA-G2-A3IB | #####    | #NUM!    | #NUM!    | 1 | 1 | BLCA | 7     | 1   | 98   | 8   |
| TCGA-BT-A20N | #####    | #####    | #####    | 1 | 1 | BLCA | 26    | 1   | 244  | 45  |
| TCGA-DK-A2I6 | #####    | #####    | #NUM!    | 1 | 1 | BLCA | 87    | 0   | 243  | 57  |
| TCGA-G2-AA3B | #####    | #NUM!    | #NUM!    | 1 | 1 | BLCA | 66    | 0   | NA   | NA  |
| TCGA-HQ-A2OF | #####    | #NUM!    | #NUM!    | 1 | 1 | BLCA | 64    | 0   | NA   | NA  |
| TCGA-HC-7819 | 8.030197 | #NUM!    | 0.198117 | 1 | 1 | PRAD | 17.84 | 0.0 | 66   | 7   |



|              |          |           |           |   |   |      |       |     |     |    |
|--------------|----------|-----------|-----------|---|---|------|-------|-----|-----|----|
| TCGA-ZG-A9LZ | 7.665727 | 0.897550  | 0.160520  | 1 | 1 | PRAD | 22.73 | 0.0 | NA  | NA |
| TCGA-EJ-5516 | 7.826405 | 0.353323  | -0.231583 | 1 | 1 | PRAD | 62.06 | 0.0 | 38  | 3  |
| TCGA-TP-A8TT | 7.623789 | 1.069221  | -0.515810 | 1 | 1 | PRAD | 17.28 | 0.0 | NA  | NA |
| TCGA-V1-A9OA | 7.698791 | 0.465922  | -0.534099 | 1 | 1 | PRAD | 20.89 | 0.0 | NA  | NA |
| TCGA-EJ-5495 | 7.985871 | 0.959844  | -0.625066 | 1 | 1 | PRAD | 57.82 | 0.0 | 70  | 9  |
| TCGA-V1-A9OF | 7.694573 | 0.128544  | -0.871469 | 1 | 1 | PRAD | 38.90 | 0.0 | NA  | NA |
| TCGA-KK-A8I8 | 7.595762 | 0.713080  | -0.871971 | 1 | 1 | PRAD | 31.77 | 0.0 | NA  | NA |
| TCGA-EJ-A46G | 7.749578 | #NUM!     | -0.879675 | 1 | 1 | PRAD | 21.94 | 0.0 | 51  | 10 |
| TCGA-EJ-5496 | 7.949105 | -0.062068 | -1.062234 | 1 | 1 | PRAD | 19.55 | 0.0 | 44  | 11 |
| TCGA-HC-7231 | 7.763105 | 0.534251  | -1.465580 | 1 | 1 | PRAD | 30.85 | 0.0 | 40  | 9  |
| TCGA-HC-7230 | 7.750967 | -1.662460 | -1.662460 | 1 | 1 | PRAD | 32.88 | 0.0 | 46  | 13 |
| TCGA-CH-5740 | 7.823086 | 0.881195  | #NUM!     | 1 | 1 | PRAD | 1.02  | 0.0 | 34  | 8  |
| TCGA-YL-A8SA | 7.796263 | -0.907522 | #NUM!     | 1 | 1 | PRAD | 16.82 | 0.0 | NA  | NA |
| TCGA-CH-5741 | 7.626168 | -0.962435 | #NUM!     | 1 | 1 | PRAD | 12.98 | 0.0 | 46  | 4  |
| TCGA-RB-A7B8 | 9.7497   | 2.4266    | 0.8417    | 1 | 1 | PAAD | 15.31 | 1.0 | 115 | NA |
| TCGA-3A-A9I5 | 10.6194  | 2.2636    | 0.2636    | 1 | 1 | PAAD | 58.94 | 0.0 | 58  | NA |
| TCGA-2L-AAQA | 10.3175  | 2.0078    | 0.6859    | 1 | 1 | PAAD | 4.70  | 1.0 | 76  | NA |
| TCGA-2J-AABO | 9.9797   | 2.0023    | -0.3196   | 1 | 1 | PAAD | 14.45 | 0.0 | 108 | NA |
| TCGA-IB-AAUN | 9.8298   | 1.9763    | -0.8311   | 1 | 1 | PAAD | 4.73  | 1.0 | 59  | NA |
| TCGA-US-A77E | 9.8797   | 1.9746    | 0.3896    | 1 | 1 | PAAD | 14.13 | 1.0 | 111 | NA |
| TCGA-2J-AAB4 | 10.4501  | 1.9214    | 0.7515    | 1 | 1 | PAAD | 23.95 | 0.0 | 50  | NA |
| TCGA-IB-7654 | 10.1223  | 1.8965    | -0.1035   | 1 | 1 | PAAD | 15.64 | 1.0 | NA  | NA |
| TCGA-IB-7646 | 9.8490   | 1.8292    | #NUM!     | 1 | 1 | PAAD | 4.76  | 1.0 | 69  | NA |
| TCGA-2J-AABH | 10.5197  | 1.8009    | -0.1991   | 1 | 1 | PAAD | 42.28 | 0.0 | 49  | NA |
| TCGA-HZ-A9TJ | 10.0385  | 1.7809    | -0.8039   | 1 | 1 | PAAD | 19.81 | 0.0 | 101 | NA |
| TCGA-2L-AAQI | 9.8183   | 1.7660    | -0.0414   | 1 | 1 | PAAD | 3.38  | 1.0 | 65  | NA |
| TCGA-F2-A44G | 9.9530   | 1.7274    | -0.8575   | 1 | 1 | PAAD | 7.65  | 1.0 | 46  | NA |
| TCGA-IB-A5SP | 9.7787   | 1.6069    | #NUM!     | 1 | 1 | PAAD | 15.83 | 0.0 | 109 | NA |
| TCGA-FB-AAPC | 10.0336  | 1.4288    | #NUM!     | 1 | 1 | PAAD | 37.12 | 1.0 | NA  | NA |
| TCGA-HV-AA8X | 10.2461  | 1.3749    | -0.2101   | 1 | 1 | PAAD | 17.48 | 1.0 | 69  | NA |
| TCGA-2L-AAQJ | 10.2194  | 0.9856    | 0.5706    | 1 | 1 | PAAD | 12.94 | 1.0 | 127 | NA |
| TCGA-FB-AAPU | 11.0907  | 0.9087    | 0.1717    | 1 | 1 | PAAD | 12.52 | 1.0 | 113 | NA |
| TCGA-HZ-A8P1 | 10.5404  | 0.8451    | #NUM!     | 1 | 1 | PAAD | 0.23  | 0.0 | 73  | NA |
| TCGA-IB-7644 | 10.0127  | 0.6170    | -0.7049   | 1 | 1 | PAAD | 12.94 | 1.0 | 79  | NA |
| TCGA-FB-AAQ0 | 10.6347  | 0.2439    | #NUM!     | 1 | 1 | PAAD | 15.54 | 1.0 | 74  | NA |
| TCGA-FB-AAPP | 10.2298  | -0.5239   | -0.5239   | 1 | 1 | PAAD | 15.93 | 1.0 | NA  | NA |
| TCGA-S4-A8RM | 10.1364  | #NUM!     | -1.2660   | 1 | 1 | PAAD | 24.21 | 0.0 | 65  | NA |
| TCGA-HZ-7289 | 10.0377  | #NUM!     | -0.9359   | 1 | 1 | PAAD | 21.71 | 1.0 | NA  | NA |
| TCGA-BQ-5892 | 8.928738 | 0.104337  | #NUM!     | 1 | 1 | KIRP | 12    | 0.0 | 36  | 18 |
| TCGA-DZ-6135 | 9.398744 | -0.372769 | #NUM!     | 1 | 1 | KIRP | 75    | 0.0 | 38  | 8  |
| TCGA-A4-A5DU | 8.760935 | -0.732884 | #NUM!     | 1 | 1 | KIRP | 16    | 0.0 | 128 | 8  |
| TCGA-A4-7732 | 8.690549 | -0.813246 | #NUM!     | 1 | 1 | KIRP | 19    | 0.0 | 45  | 16 |
| TCGA-2Z-A9J7 | 8.201231 | -0.920573 | #NUM!     | 1 | 1 | KIRP | 5     | 1.0 | NA  | NA |
| TCGA-5P-A9K4 | 8.706199 | -1.074004 | #NUM!     | 1 | 1 | KIRP | 72    | 0.0 | NA  | NA |
| TCGA-UZ-A9PR | 8.334245 | -1.527412 | #NUM!     | 1 | 1 | KIRP | 86    | 0.0 | NA  | NA |
| TCGA-BQ-5876 | 9.245241 | #NUM!     | #NUM!     | 1 | 1 | KIRP | 19    | 0.0 | 40  | 21 |
| TCGA-DW-7837 | 9.176858 | #NUM!     | #NUM!     | 1 | 1 | KIRP | 38    | 0.0 | 45  | 10 |
| TCGA-IA-A40X | 8.979166 | #NUM!     | #NUM!     | 1 | 1 | KIRP | 20    | 0.0 | 79  | 6  |
| TCGA-BQ-5891 | 8.509056 | #NUM!     | #NUM!     | 1 | 1 | KIRP | 1     | 0.0 | 71  | 2  |
| TCGA-AL-3466 | 8.468636 | #NUM!     | #NUM!     | 1 | 1 | KIRP | 10    | 1.0 | 72  | 10 |
| TCGA-D1-A2G0 | 10.6895  | 2.5951    | -0.7269   | 1 | 1 | UCEC | 49    | 0   | NA  | NA |
| TCGA-B5-A5OE | 10.5931  | 1.2501    | -1.7500   | 1 | 1 | UCEC | 35    | 0   | NA  | NA |
| TCGA-B5-A0JN | 9.7612   | 0.8064    | -1.5154   | 1 | 1 | UCEC | 80    | 0   | 94  | NA |
| TCGA-BK-A4ZD | 9.2663   | -1.5117   | -1.5117   | 1 | 1 | UCEC | 17    | 0   | NA  | NA |

|              |            |           |           |   |   |       |        |     |      |      |
|--------------|------------|-----------|-----------|---|---|-------|--------|-----|------|------|
| TCGA-A5-A7WJ | 9.2136     | -0.2124   | #NUM!     | 1 | 1 | UCEC  | 11     | 0   | NA   | NA   |
| TCGA-FI-A3PV | 8.8899     | 1.2814    | #NUM!     | 1 | 1 | UCEC  | 41     | 1   | NA   | NA   |
| TCGA-B5-A3S1 | 8.8785     | 0.9991    | -0.5860   | 1 | 1 | UCEC  | 30     | 0   | NA   | NA   |
| TCGA-KP-A3W1 | 8.8231     | 2.6556    | #NUM!     | 1 | 1 | UCEC  | 9      | 0   | NA   | NA   |
| TCGA-SL-A6JA | 8.7922     | -1.3537   | #NUM!     | 1 | 1 | UCEC  | 0      | 0   | NA   | NA   |
| TCGA-A5-A2K2 | 8.7824     | 2.4749    | #NUM!     | 1 | 1 | UCEC  | 118    | 0   | NA   | NA   |
| TCGA-AX-A2H4 | 8.7461     | 1.8344    | #NUM!     | 1 | 1 | UCEC  | 30     | 1   | NA   | NA   |
| TCGA-AP-A3K1 | 8.7254     | 0.1117    | #NUM!     | 1 | 1 | UCEC  | 22     | 1   | NA   | NA   |
| TCGA-EY-A54A | 8.6921     | 1.3028    | #NUM!     | 1 | 1 | UCEC  | 15     | 0   | NA   | NA   |
| TCGA-FI-A2EY | 8.6807     | 2.0000    | #NUM!     | 1 | 1 | UCEC  | 29     | 1   | NA   | NA   |
| TCGA-DF-A2KN | 8.6473     | 2.0456    | #NUM!     | 1 | 1 | UCEC  | 2      | 0   | NA   | NA   |
| TCGA-AX-A3GI | 8.5045     | 1.8083    | -0.9991   | 1 | 1 | UCEC  | 0      | 0   | NA   | NA   |
| TCGA-A5-A3LO | 8.4775     | 0.3428    | #NUM!     | 1 | 1 | UCEC  | 25     | 0   | NA   | NA   |
| TCGA-B5-A0K9 | 8.4469     | 0.1461    | -1.4387   | 1 | 1 | UCEC  | 13     | 1   | 530  | 129  |
| TCGA-DI-A2QT | 8.3719     | 2.9956    | #NUM!     | 1 | 1 | UCEC  | 12     | 1   | NA   | NA   |
| TCGA-JU-AAVI | 8.3564     | 1.1779    | #NUM!     | 1 | 1 | UCEC  | 18     | 1   | NA   | NA   |
| TCGA-EY-A3QX | 8.1753     | 1.0689    | #NUM!     | 1 | 1 | UCEC  | 32     | 1   | NA   | NA   |
| TCGA-AX-A3G9 | 8.1401     | 1.8640    | #NUM!     | 1 | 1 | UCEC  | 18     | 0   | NA   | NA   |
| TCGA-E6-A2P8 | 8.1159     | 1.0908    | -0.9091   | 1 | 1 | UCEC  | 2      | 1   | NA   | NA   |
| TCGA-K6-A3WC | 8.0651     | -0.8975   | #NUM!     | 1 | 1 | UCEC  | 14     | 1   | NA   | NA   |
| TCGA-SJ-A6ZI | 8.0290     | 0.3148    | -0.6852   | 1 | 1 | UCEC  | 21     | 0   | NA   | NA   |
| TCGA-AJ-A3BG | 7.9993     | 1.8702    | #NUM!     | 1 | 1 | UCEC  | 18     | 0   | NA   | NA   |
| TCGA-AJ-A3EK | 7.9813     | -0.2450   | #NUM!     | 1 | 1 | UCEC  | 15     | 0   | NA   | NA   |
| TCGA-KP-A3W4 | 7.9580     | 2.0644    | -1.5204   | 1 | 1 | UCEC  | 18     | 1   | NA   | NA   |
| TCGA-AX-A2IN | 7.8963     | 1.1388    | #NUM!     | 1 | 1 | UCEC  | 31     | 1   | NA   | NA   |
| TCGA-AJ-A2QO | 7.8205     | 2.9452    | #NUM!     | 1 | 1 | UCEC  | 34     | 1   | NA   | NA   |
| TCGA-EY-A4KR | 7.7805     | 2.4234    | -1.1617   | 1 | 1 | UCEC  | 11     | 1   | NA   | NA   |
| TCGA-DM-A1HE | #####      | #####     | #####     | 1 | 1 | Colon | 136    | 0.0 | NA   | NA   |
| TCGA-AA-3556 | #####      | #####     | #####     | 1 | 1 | Colon | 23     | 0.0 | #N/A | #N/A |
| TCGA-CM-6166 | #####      | #####     | #NUM!     | 1 | 1 | Colon | 22     | 0.0 | 42   | NA   |
| TCGA-CA-6715 | #####      | #####     | #NUM!     | 1 | 1 | Colon | 13     | 0.0 | NA   | NA   |
| TCGA-AA-A029 | #####      | #####     | #####     | 1 | 1 | Colon | 52     | 0.0 | #N/A | #N/A |
| TCGA-AD-A5EJ | #####      | #####     | #####     | 1 | 1 | Colon | 0      | 0.0 | NA   | NA   |
| TCGA-QG-A5YX | #####      | #####     | #NUM!     | 1 | 1 | Colon | 33     | 0.0 | NA   | NA   |
| TCGA-CK-5912 | #####      | #####     | #NUM!     | 1 | 1 | Colon | 49     | 1.0 | 26   | NA   |
| TCGA-DM-A28H | #####      | #####     | #NUM!     | 1 | 1 | Colon | 117    | 0.0 | 42   | NA   |
| TCGA-D5-6530 | #####      | #####     | #NUM!     | 1 | 1 | Colon | 20     | 0.0 | NA   | NA   |
| TCGA-A6-6650 | #####      | #####     | #NUM!     | 1 | 1 | Colon | 21     | 0.0 | 49   | NA   |
| TCGA-CK-5913 | #####      | #####     | #####     | 1 | 1 | Colon | 51     | 0.0 | 306  | NA   |
| TCGA-AD-6890 | #####      | #####     | #####     | 1 | 1 | Colon | 25     | 0.0 | 45   | NA   |
| TCGA-D5-6533 | #####      | #####     | #NUM!     | 1 | 1 | Colon | 25     | 0.0 | 60   | NA   |
| TCGA-AA-3984 | #####      | #####     | #####     | 1 | 1 | Colon | 0      | 0.0 | #N/A | #N/A |
| TCGA-AA-3663 | #####      | #####     | #NUM!     | 1 | 1 | Colon | 7      | 0.0 | 1067 | NA   |
| TCGA-AY-6386 | #####      | #####     | #NUM!     | 1 | 1 | Colon | 18     | 0.0 | 144  | NA   |
| TCGA-A6-6653 | #####      | #####     | #####     | 1 | 1 | Colon | 24     | 0.0 | 420  | NA   |
| TCGA-CM-6675 | #####      | #####     | #NUM!     | 1 | 1 | Colon | 13     | 0.0 | 33   | NA   |
| TCGA-DM-A1Dc | #####      | #####     | #####     | 1 | 1 | Colon | 50     | 1.0 | 44   | NA   |
| TCGA-A6-6780 | #####      | #####     | #NUM!     | 1 | 1 | Colon | 20     | 0.0 | 482  | NA   |
| TCGA-AA-3854 | #####      | #####     | #####     | 1 | 1 | Colon | 36     | 0.0 | #N/A | #N/A |
| TCGA-DM-A28K | #####      | #####     | #NUM!     | 1 | 1 | Colon | 98     | 0.0 | 36   | NA   |
| TCGA-CK-4952 | #####      | #####     | #NUM!     | 1 | 1 | Colon | 16     | 0.0 | 112  | NA   |
| TCGA-D5-6930 | #####      | #####     | #####     | 1 | 1 | Colon | 13     | 0.0 | 517  | NA   |
| TCGA-BB-4223 | 9.56826492 | 0.0130692 | 0.597984  | 2 | 1 | HNSC  | 105.81 | 0.0 | 253  | 53   |
| TCGA-CR-5247 | 7.70169044 | #NUM!     | 1.8760552 | 2 | 1 | HNSC  | 11.76  | 0.0 | 70   | 17   |

|              |            |           |            |   |   |      |       |     |      |    |
|--------------|------------|-----------|------------|---|---|------|-------|-----|------|----|
| TCGA-H7-8502 | 7.42753829 | -0.659951 | -0.6599505 | 2 | 1 | HNSC | 15.05 | 0.0 | NA   | NA |
| TCGA-BB-4228 | 8.51674482 | -1.349971 | -0.3499708 | 2 | 1 | HNSC | 18.36 | 0.0 | 39   | 8  |
| TCGA-D6-8569 | 7.36689918 | -0.736485 | -0.7364848 | 2 | 1 | HNSC | 25.3  | 0.0 | NA   | NA |
| TCGA-CR-7365 | 7.67881631 | 0.1790014 | -0.4060248 | 2 | 1 | HNSC | 00000 | 0.0 | 146  | 22 |
| TCGA-D6-A4ZB | 7.16762287 | #NUM!     | 0.8734983  | 2 | 1 | HNSC | 12.35 | 0.0 | NA   | NA |
| TCGA-CR-6484 | 7.15428042 | -1.176251 | 0.4086032  | 2 | 1 | HNSC | 11.63 | 0.0 | 233  | 48 |
| TCGA-BB-7862 | 7.44047305 | 0.13711   | -0.4479181 | 2 | 1 | HNSC | 00000 | 0.0 | NA   | NA |
| TCGA-TQ-A7RG | 7.5115     | #NUM!     | -0.0234    | 2 | 1 | LGG  | 19.68 | 0   | NA   | NA |
| TCGA-TQ-A7RM | 7.5651     | #NUM!     | 0.8315     | 2 | 1 | LGG  | 36.66 | 0   | NA   | NA |
| TCGA-FG-A4MT | 7.5796     | #NUM!     | 0.3898     | 2 | 1 | LGG  | 38.24 | 0   | 17   | NA |
| TCGA-HT-7693 | 8.2488     | -1.4352   | 4.2651     | 2 | 1 | LGG  | 17.51 | 0   | 21   | 8  |
| TCGA-P5-A5EU | 8.0363     | -1.4089   | 2.3987     | 2 | 1 | LGG  | 0.00  | 0   | 19   | 5  |
| TCGA-P5-A5EW | 7.3239     | -1.2723   | -0.2723    | 2 | 1 | LGG  | 6.70  | 0   | 10   | 1  |
| TCGA-DU-8167 | 7.4516     | -1.2622   | -0.2622    | 2 | 1 | LGG  | 15.47 | 0   | 38   | 19 |
| TCGA-P5-A72W | 7.6799     | -0.9819   | 1.6031     | 2 | 1 | LGG  | 10.41 | 0   | NA   | NA |
| TCGA-S9-A7R8 | 7.2728     | -0.9456   | 1.0545     | 2 | 1 | LGG  | 31.57 | 1   | NA   | NA |
| TCGA-HW-A5KM | 8.2197     | -0.8515   | 1.3184     | 2 | 1 | LGG  | 20.70 | 0   | 12   | 5  |
| TCGA-DU-5847 | 8.0666     | -0.7389   | 0.5830     | 2 | 1 | LGG  | 18.00 | 0   | 28   | 2  |
| TCGA-KT-A7W1 | 7.2876     | -0.6036   | -0.6036    | 2 | 1 | LGG  | 14.39 | 0   | NA   | NA |
| TCGA-CS-4942 | 7.8213     | -0.5312   | 1.6389     | 2 | 1 | LGG  | 43.86 | 1   | 18   | 9  |
| TCGA-FG-6691 | 7.2339     | -0.5142   | 0.4857     | 2 | 1 | LGG  | 41.29 | 0   | 10   | 8  |
| TCGA-HT-8110 | 7.7551     | -0.4020   | 1.1829     | 2 | 1 | LGG  | 13.76 | 0   | 22   | 6  |
| TCGA-FG-8187 | 8.0381     | -0.2539   | -1.2539    | 2 | 1 | LGG  | 20.07 | 0   | 8    | 2  |
| TCGA-DU-A7TD | 7.9165     | -0.2097   | 0.7903     | 2 | 1 | LGG  | 7.49  | 1   | NA   | NA |
| TCGA-CS-5396 | 7.7210     | -0.1198   | -0.1198    | 2 | 1 | LGG  | 53.58 | 0   | 21   | 11 |
| TCGA-S9-A7QX | 7.6078     | -0.1189   | -1.1190    | 2 | 1 | LGG  | 18.53 | 0   | NA   | NA |
| TCGA-S9-A6U9 | 7.6867     | -0.0530   | -1.0532    | 2 | 1 | LGG  | 95.86 | 0   | NA   | NA |
| TCGA-E1-A7YH | 7.8601     | 0.1972    | 1.4196     | 2 | 1 | LGG  | 93.13 | 1   | NA   | NA |
| TCGA-FG-A4ML | 7.3795     | 0.3016    | 2.8041     | 2 | 1 | LGG  | 10.71 | 0   | 52   | NA |
| TCGA-FG-6690 | 8.1513     | 0.3058    | -0.2791    | 2 | 1 | LGG  | 42.51 | 0   | 22   | NA |
| TCGA-DU-6402 | 7.2838     | 0.3596    | 1.9446     | 2 | 1 | LGG  | 7.03  | 1   | 34   | 6  |
| TCGA-HT-7472 | 7.5422     | 0.4209    | 1.0059     | 2 | 1 | LGG  | 0.03  | 0   | 15   | 4  |
| TCGA-E1-A7YW | 7.9833     | 0.4628    | -1.1222    | 2 | 1 | LGG  | 36.79 | 1   | NA   | NA |
| TCGA-E1-A7Z6 | 7.6445     | 0.4968    | -1.0880    | 2 | 1 | LGG  | 32.33 | 1   | NA   | NA |
| TCGA-OR-A5JE | 7.6373     | #NUM!     | 2.3478     | 2 | 1 | ACC  | 69.15 | 1   | 61   | NA |
| TCGA-FR-A3YO | 7.86916    | 2.70405   | -0.99625   | 2 | 1 | SKCM | ####  | 0   | 669  | NA |
| TCGA-D3-A3CC | 7.52367    | 2.69198   | 2.20655    | 2 | 1 | SKCM | 87    | 0   | 31   | NA |
| TCGA-ER-A19M | 7.34278    | 2.66578   | -1.42159   | 2 | 1 | SKCM | 61    | 1   | 378  | NA |
| TCGA-FS-A4FC | 7.93680    | 2.62534   | 1.04040    | 2 | 1 | SKCM | 54    | 1   | 581  | NA |
| TCGA-YD-A9TA | 8.00991    | 2.60096   | -0.56897   | 2 | 1 | SKCM | 49    | 0   | NA   | NA |
| TCGA-D9-A4Z5 | 7.37052    | 2.53179   | 2.53179    | 2 | 1 | SKCM | 7     | 0   | 71   | NA |
| TCGA-WE-A8ZT | 7.66867    | 2.50774   | -1.39897   | 2 | 1 | SKCM | 12    | 0   | NA   | NA |
| TCGA-BF-A1PX | 8.01360    | 2.47542   | 1.93486    | 2 | 1 | SKCM | 9     | 1   | 300  | 37 |
| TCGA-D3-A2JN | 8.68916    | 2.44694   | 1.70995    | 2 | 1 | SKCM | 66    | 1   | 272  | NA |
| TCGA-FS-A1ZB | 8.78537    | 2.40231   | 1.12221    | 2 | 1 | SKCM | 49    | 1   | 192  | 34 |
| TCGA-FR-A8YE | 7.96232    | 2.38778   | -0.31258   | 2 | 1 | SKCM | 104   | 0   | NA   | NA |
| TCGA-D3-A2JH | 7.40132    | 2.33451   | -0.75292   | 2 | 1 | SKCM | 42    | 0   | 505  | 59 |
| TCGA-EE-A29C | 7.66901    | 2.31536   | 0.73040    | 2 | 1 | SKCM | 79    | 1   | 344  | NA |
| TCGA-GN-A26A | 7.39031    | 2.26120   | 0.93923    | 2 | 1 | SKCM | 32    | 1   | 271  | 33 |
| TCGA-DA-A1HV | 7.78846    | 2.20689   | 0.46989    | 2 | 1 | SKCM | 77    | 0   | 1084 | NA |
| TCGA-D3-A1Q6 | 8.42553    | 2.20292   | -0.11904   | 2 | 1 | SKCM | 72    | 1   | 624  | 78 |
| TCGA-YG-AA3N | 7.38162    | 2.14320   | 0.14326    | 2 | 1 | SKCM | 10    | 0   | NA   | NA |
| TCGA-ER-A19J | 7.20029    | 2.10286   | 1.83980    | 2 | 1 | SKCM | 6     | 1   | 172  | NA |
| TCGA-BF-A3DJ | 7.89991    | 2.04817   | -1.53701   | 2 | 1 | SKCM | 15    | 0   | 123  | 22 |

|              |            |           |           |   |   |      |      |   |      |     |
|--------------|------------|-----------|-----------|---|---|------|------|---|------|-----|
| TCGA-EE-A3AA | 7.66860    | 2.02531   | -0.29654  | 2 | 1 | SKCM | 124  | 0 | 1409 | NA  |
| TCGA-GF-A6C8 | 8.49397    | 1.99095   | -1.33097  | 2 | 1 | SKCM | 2    | 0 | 309  | NA  |
| TCGA-WE-A8ZV | 7.97387    | 1.93787   | 0.76799   | 2 | 1 | SKCM | 101  | 0 | NA   | NA  |
| TCGA-GF-A6C9 | 8.01885    | 1.85726   | -1.14274  | 2 | 1 | SKCM | 16   | 0 | 2649 | NA  |
| TCGA-D3-A8GC | 7.34783    | 1.84535   | 7.01526   | 2 | 1 | SKCM | #### | 1 | NA   | NA  |
| TCGA-EE-A3JE | 8.09371    | 1.84165   | -0.15827  | 2 | 1 | SKCM | 51   | 0 | 246  | 45  |
| TCGA-DA-A3F5 | 7.34363    | 1.83192   | -0.33807  | 2 | 1 | SKCM | 226  | 1 | 275  | NA  |
| TCGA-FS-A1ZR | 7.57789    | 1.77062   | 0.50762   | 2 | 1 | SKCM | 11   | 1 | 118  | 19  |
| TCGA-D3-A2JC | 8.19867    | 1.69140   | -1.30864  | 2 | 1 | SKCM | 87   | 0 | 166  | NA  |
| TCGA-DA-A1IC | 7.60936    | 1.68212   | -1.31797  | 2 | 1 | SKCM | 68   | 1 | 756  | 138 |
| TCGA-DA-A1I1 | 7.30722    | 1.66657   | -1.50349  | 2 | 1 | SKCM | 222  | 0 | 324  | 52  |
| TCGA-GN-A266 | 8.08610    | 1.59903   | -0.57089  | 2 | 1 | SKCM | 10   | 1 | 3088 | 335 |
| TCGA-RP-A693 | 7.48286    | 1.52562   | -0.05934  | 2 | 1 | SKCM | 0    | 0 | 649  | NA  |
| TCGA-EE-A2MG | 8.22203    | 1.42132   | -0.57863  | 2 | 1 | SKCM | 103  | 1 | 180  | NA  |
| TCGA-WE-A8ZX | 7.81237    | 1.39083   | -0.93099  | 2 | 1 | SKCM | 36   | 0 | NA   | NA  |
| TCGA-D3-A1Q4 | 7.74218    | 1.38830   | -0.41908  | 2 | 1 | SKCM | 112  | 0 | 214  | NA  |
| TCGA-ER-A3ET | 7.50385    | 1.32193   | 0.58496   | 2 | 1 | SKCM | 93   | 1 | 95   | 16  |
| TCGA-EE-A3JB | 8.39992    | 1.26550   | 0.58746   | 2 | 1 | SKCM | 202  | 0 | 498  | NA  |
| TCGA-D3-A3MC | 7.79041    | 1.26237   | -0.54498  | 2 | 1 | SKCM | 9    | 1 | 61   | 13  |
| TCGA-D3-A3CE | 8.92744    | 1.16652   | 0.16646   | 2 | 1 | SKCM | 60   | 1 | 39   | NA  |
| TCGA-EE-A17X | 7.54512    | 1.12241   | -0.46255  | 2 | 1 | SKCM | 30   | 1 | 647  | NA  |
| TCGA-ER-A193 | 7.66523    | 1.11283   | 1.11283   | 2 | 1 | SKCM | 31   | 1 | 1584 | NA  |
| TCGA-EE-A3AH | 7.58753    | 1.10279   | 2.29546   | 2 | 1 | SKCM | 139  | 1 | 329  | NA  |
| TCGA-RP-A695 | 7.18927    | 1.09754   | -1.22432  | 2 | 1 | SKCM | #### | 0 | 689  | NA  |
| TCGA-IH-A3EA | 7.36524    | 0.99892   | 0.99892   | 2 | 1 | SKCM | 17   | 0 | 1231 | 131 |
| TCGA-EE-A2MK | 7.22939    | 0.98907   | -0.33279  | 2 | 1 | SKCM | 180  | 0 | 239  | NA  |
| TCGA-D3-A5GR | 7.68370    | 0.98681   | -1.33497  | 2 | 1 | SKCM | 178  | 0 | 210  | NA  |
| TCGA-EB-A82B | 7.65081    | 0.88596   | -1.11404  | 2 | 1 | SKCM | 13   | 0 | NA   | NA  |
| TCGA-EE-A2GD | 7.59245    | 0.81295   | -1.18705  | 2 | 1 | SKCM | 340  | 1 | 456  | 71  |
| TCGA-FS-A4F2 | 8.09156    | 0.73838   | 0.41652   | 2 | 1 | SKCM | 50   | 1 | NA   | NA  |
| TCGA-FS-A1ZU | 7.48724    | 0.69608   | -1.30401  | 2 | 1 | SKCM | 27   | 1 | 40   | NA  |
| TCGA-FR-A69P | 7.24499    | 0.41630   | 0.41630   | 2 | 1 | SKCM | 16   | 0 | 190  | NA  |
| TCGA-EE-A17Y | 7.63245    | 0.12247   | -1.46236  | 2 | 1 | SKCM | 27   | 1 | 135  | 26  |
| TCGA-WE-AAAC | 7.45708    | 0.05658   | -1.52824  | 2 | 1 | SKCM | 40   | 0 | NA   | NA  |
| TCGA-EB-A5UN | 7.34612    | -0.17316  | 0.82684   | 2 | 1 | SKCM | 59   | 0 | 598  | NA  |
| TCGA-GN-A262 | 8.21959    | -0.40698  | -1.40698  | 2 | 1 | SKCM | 140  | 0 | 286  | NA  |
| TCGA-EE-A29W | 8.03416    | -0.47513  | -1.47513  | 2 | 1 | SKCM | 195  | 0 | 67   | NA  |
| TCGA-BF-A3DM | 8.21823    | -0.64250  | 2.26442   | 2 | 1 | SKCM | 20   | 0 | 375  | 47  |
| TCGA-D9-A4Z3 | 8.38202    | -1.21893  | -1.21893  | 2 | 1 | SKCM | 17   | 0 | 666  | NA  |
| TCGA-DA-A95Y | 8.69758    | #NUM!     | 0.58140   | 2 | 1 | SKCM | 14   | 1 | NA   | NA  |
| TCGA-WE-A8ZC | 8.80326    | #NUM!     | 2.72292   | 2 | 1 | SKCM | 63   | 0 | NA   | NA  |
| TCGA-EO-A3AV | 9.7136     | 0.6698    | 2.5443    | 2 | 1 | UCEC | 35   | 0 | NA   | NA  |
| TCGA-PG-A6IB | 9.5971     | 1.6731    | 1.8658    | 2 | 1 | UCEC | 21   | 0 | NA   | NA  |
| TCGA-AJ-A3BH | 9.0089     | #NUM!     | 0.1433    | 2 | 1 | UCEC | #### | 0 | NA   | NA  |
| TCGA-EY-A2ON | 7.9554     | 0.2524    | 0.2524    | 2 | 1 | UCEC | 20   | 1 | NA   | NA  |
| TCGA-55-8505 | 11.7627542 | 3.9174604 | 3.3896494 | 2 | 1 | LUAD | 14   | 0 | NA   | NA  |
| TCGA-62-A46R | 10.1298462 | 3.801378  | 6.889055  | 2 | 1 | LUAD | 57   | 1 | NA   | NA  |
| TCGA-55-8096 | 9.57265256 | 3.7498239 | 3.6903065 | 2 | 1 | LUAD | 24   | 1 | NA   | NA  |
| TCGA-69-7980 | 9.32860079 | 3.6654508 | 3.9775089 | 2 | 1 | LUAD | 14   | 0 | 688  | NA  |
| TCGA-05-5715 | 9.0915628  | 3.430668  | 4.902911  | 2 | 1 | LUAD | 2    | 0 | 107  | 24  |
| TCGA-50-5935 | 9.09581938 | 3.0165623 | 3.5938629 | 2 | 1 | LUAD | 21   | 1 | 102  | 18  |
| TCGA-73-4676 | 9.07125157 | 2.9550486 | 5.3956222 | 2 | 1 | LUAD | 9    | 1 | 80   | NA  |
| TCGA-62-A46P | 9.17886447 | 2.283421  | 3.2545623 | 2 | 1 | LUAD | 20   | 1 | NA   | NA  |
| TCGA-71-8520 | 9.68513839 | 1.8852112 | 4.8588652 | 2 | 1 | LUAD | 7    | 1 | NA   | NA  |

|              |            |           |           |   |   |      |       |     |     |     |
|--------------|------------|-----------|-----------|---|---|------|-------|-----|-----|-----|
| TCGA-50-5049 | 9.32642225 | 3.8218255 | 3.1760626 | 2 | 1 | LUAD | 102   | 0   | 682 | 139 |
| TCGA-55-8513 | 9.95975555 | 3.7824002 | 4.2626985 | 2 | 1 | LUAD | 26    | 0   | NA  | NA  |
| TCGA-50-6593 | 9.3452322  | 3.397855  | 7.7420883 | 2 | 1 | LUAD | 11    | 1   | 265 | 32  |
| TCGA-44-A47A | 9.26084238 | 3.396639  | 5.6118168 | 2 | 1 | LUAD | 15    | 0   | NA  | NA  |
| TCGA-49-4494 | 9.53600346 | 3.2857307 | 3.4941903 | 2 | 1 | LUAD | 36    | 1   | 169 | 28  |
| TCGA-49-6742 | 9.94431501 | 3.09996   | 3.3185251 | 2 | 1 | LUAD | 16    | 1   | 253 | 49  |
| TCGA-78-7150 | 10.5689542 | 3.0020274 | 3.3239364 | 2 | 1 | LUAD | 22    | 1   | 352 | NA  |
| TCGA-97-7941 | 10.3034536 | 2.9345976 | 4.6545851 | 2 | 1 | LUAD | 16    | 0   | 83  | NA  |
| TCGA-69-7764 | 9.24701258 | 2.6658521 | 3.3360591 | 2 | 1 | LUAD | 14    | 0   | 77  | NA  |
| TCGA-97-A4M3 | 9.08568373 | 2.1107274 | 6.5439765 | 2 | 1 | LUAD | 18    | 0   | NA  | NA  |
| TCGA-73-A9RS | 9.72705022 | 2.8851272 | 5.2898677 | 2 | 1 | LUAD | 11    | 1   | NA  | NA  |
| TCGA-50-5930 | 9.73177597 | 1.653615  | 8.6581284 | 2 | 1 | LUAD | 9     | 1   | NA  | 94  |
| TCGA-FU-A3EO | #####      | #####     | #####     | 2 | 1 | CESC | 16.10 | 0.0 | 51  | 15  |
| TCGA-EK-A3GM | #####      | #####     | #####     | 2 | 1 | CESC | 0.00  | 0.0 | 158 | 28  |
| TCGA-C5-A1ME | #####      | #####     | #####     | 2 | 1 | CESC | 57.69 | 0.0 | 50  | 9   |
| TCGA-C5-A7UC | #####      | #####     | #####     | 2 | 1 | CESC | 17.18 | 1.0 | 57  | 9   |
| TCGA-VS-A9UO | #####      | #####     | #####     | 2 | 1 | CESC | 47.83 | 0.0 | NA  | NA  |
| TCGA-VS-A9V1 | #####      | #####     | #####     | 2 | 1 | CESC | 5.16  | 1.0 | NA  | NA  |
| TCGA-VS-A952 | #####      | #NUM!     | #####     | 2 | 1 | CESC | 58.41 | 0.0 | NA  | NA  |
| TCGA-C5-A3HF | #####      | #####     | #####     | 2 | 1 | CESC | 17.84 | 1.0 | 28  | 5   |
| TCGA-C5-A2LV | #####      | #####     | #####     | 2 | 1 | CESC | 73.39 | 0.0 | 2   | 0   |
| TCGA-27-2521 | 7.2183     | -1.1825   | -1.1825   | 2 | 1 | GBM  | 17    | 1.0 | 29  | 16  |
| TCGA-19-1787 | 7.4704     | -1.2152   | #NUM!     | 2 | 1 | GBM  | 13    | 1.0 | 191 | NA  |
| TCGA-06-2570 | 7.5671     | #NUM!     | #NUM!     | 2 | 1 | GBM  | 31    | 0.0 | 22  | 8   |
| TCGA-BH-A0BP | 8.97762    | 3.22305   | 2.73001   | 2 | 1 | BRCA | 75.4  | 1   | 106 | 23  |
| TCGA-D8-A73W | 8.80667    | 3.14906   | 2.73115   | 2 | 1 | BRCA | 12.6  | 1   | NA  | NA  |
| TCGA-A2-A3XY | 8.73873    | 3.09645   | 2.72797   | 2 | 1 | BRCA | 35.9  | 1   | 36  | NA  |
| TCGA-AC-A2FE | 8.86683    | 3.01786   | 5.04420   | 2 | 1 | BRCA | 86.6  | 1   | 19  | NA  |
| TCGA-A8-A06X | 9.19389    | 2.17293   | 3.69290   | 2 | 1 | BRCA | 31.0  | 1   | 146 | 34  |
| TCGA-LL-A73Z | 8.96954    | 1.73853   | 4.04057   | 2 | 1 | BRCA | 7.5   | 1   | NA  | NA  |
| TCGA-B6-A409 | 9.07237    | 1.41657   | 2.84796   | 2 | 1 | BRCA | 18.8  | 1   | 24  | NA  |
| TCGA-BH-A42T | 9.32631    | -0.29846  | 3.58678   | 2 | 1 | BRCA | 10.5  | 1   | 25  | NA  |
| TCGA-D8-A1XC | 8.82330    | -3.68464  | 3.40814   | 2 | 1 | BRCA | 12.4  | 1   | 22  | 7   |
| TCGA-BH-A6R8 | 8.86925    | 3.26203   | 7.08626   | 2 | 1 | BRCA | 9.6   | 0   | NA  | NA  |
| TCGA-GM-A2DK | 8.80392    | 3.22870   | 4.02016   | 2 | 1 | BRCA | 86.9  | 0   | 15  | NA  |
| TCGA-GM-A2DC | 8.99375    | 3.21305   | 2.76594   | 2 | 1 | BRCA | 85.3  | 0   | 71  | NA  |
| TCGA-E2-A3DX | 9.75054    | 3.19816   | 4.40089   | 2 | 1 | BRCA | 43.5  | 0   | 9   | NA  |
| TCGA-E9-A5FL | 8.96725    | 3.17429   | 2.89333   | 2 | 1 | BRCA | 0.8   | 0   | 70  | NA  |
| TCGA-A8-A07E | 9.77431    | 3.11114   | 2.98345   | 2 | 1 | BRCA | 20.0  | 0   | 67  | 10  |
| TCGA-A8-A090 | 9.01044    | 3.10665   | 2.68966   | 2 | 1 | BRCA | 0.0   | 0   | 28  | 4   |
| TCGA-E9-A228 | 9.06936    | 3.08243   | 2.62818   | 2 | 1 | BRCA | 42.2  | 0   | 32  | 7   |
| TCGA-GM-A4EC | 9.03444    | 3.04424   | 5.33411   | 2 | 1 | BRCA | 72.0  | 0   | 19  | NA  |
| TCGA-D8-A1XG | 8.88595    | 2.89892   | 4.88994   | 2 | 1 | BRCA | 14.7  | 0   | 21  | 7   |
| TCGA-BH-A0BJ | 8.85129    | 2.58448   | 2.58449   | 2 | 1 | BRCA | 21.7  | 0   | 46  | 4   |
| TCGA-A7-A13D | 9.56746    | 2.45357   | 2.71079   | 2 | 1 | BRCA | 31.7  | 0   | 160 | 23  |
| TCGA-3C-AALK | 8.85894    | 2.42141   | 3.09326   | 2 | 1 | BRCA | 47.6  | 0   | NA  | NA  |
| TCGA-5L-AAT0 | 8.70480    | 2.20734   | 2.58688   | 2 | 1 | BRCA | 48.5  | 0   | NA  | NA  |
| TCGA-AC-A6IX | 8.72426    | 1.41591   | 3.01844   | 2 | 1 | BRCA | 12.2  | 0   | NA  | NA  |
| TCGA-A2-A4S1 | 9.39827    | 1.31246   | 3.08819   | 2 | 1 | BRCA | 26.9  | 0   | 62  | NA  |
| TCGA-AR-A24V | 8.86608    | 0.72608   | 3.35457   | 2 | 1 | BRCA | 105.2 | 0   | 21  | 6   |
| TCGA-D8-A1X7 | 8.86336    | -0.29889  | 3.78049   | 2 | 1 | BRCA | 16.7  | 0   | 21  | 5   |
| TCGA-L5-A4OT | 12.6639201 | 2.1818237 | 2.6739111 | 2 | 1 | ESCA | 4.89  | 1   | 211 | NA  |
| TCGA-L5-A8NS | 11.5823121 | 3.3616682 | 2.3684367 | 2 | 1 | ESCA | 13.4  | 0   | 357 | NA  |
| TCGA-L5-A43E | 12.8853169 | 3.1476627 | 1.8181544 | 2 | 1 | ESCA | 30.2  | 0   | 272 | NA  |

|              |            |           |           |   |   |      |       |     |     |    |
|--------------|------------|-----------|-----------|---|---|------|-------|-----|-----|----|
| TCGA-L5-A8NF | 12.0527478 | 0.826896  | 1.4225899 | 2 | 1 | ESCA | 2.66  | 1   | 114 | NA |
| TCGA-L5-A8NL | 13.3089722 | 3.3819648 | 4.8732592 | 2 | 1 | ESCA | 13.2  | 0   | 89  | NA |
| TCGA-L5-A8NH | 12.5826633 | 2.58762   | 2.5929771 | 2 | 1 | ESCA | 12.9  | 1   | 120 | NA |
| TCGA-L5-A8NV | 12.6008271 | 3.3895106 | 3.0662894 | 2 | 1 | ESCA | 52.5  | 1   | 103 | NA |
| TCGA-R6-A6DQ | 13.8818711 | 3.2325399 | 2.0887688 | 2 | 1 | ESCA | 7.59  | 1   | 71  | NA |
| TCGA-IG-A4QS | 11.5957682 | 0.48045   | 1.9902016 | 2 | 1 | ESCA | 3.88  | 1   | 216 | NA |
| TCGA-L5-A4OJ | 13.5303834 | -0.061747 | 0.9458103 | 2 | 1 | ESCA | 21    | 0   | 230 | NA |
| TCGA-2H-A9GC | 12.5952975 | 1.6290602 | 2.4598442 | 2 | 1 | ESCA | 16.2  | 1   | 126 | NA |
| TCGA-JY-A93C | 11.7461088 | 2.3229793 | 2.9210983 | 2 | 1 | ESCA | 23.2  | 0   | 87  | NA |
| TCGA-2H-A9GR | 11.8052167 | 2.807429  | 4.2815958 | 2 | 1 | ESCA | 32.4  | 1   | 286 | NA |
| TCGA-V5-AASX | 12.400153  | 1.9086013 | 1.1561629 | 2 | 1 | ESCA | 8.97  | 0   | 475 | NA |
| TCGA-VR-A8EQ | 14.8714752 | 1.7061531 | 2.4350539 | 2 | 1 | ESCA | 22.8  | 1   | 157 | NA |
| TCGA-R6-A6XG | 11.8584728 | 1.2198765 | 1.79102   | 2 | 1 | ESCA | 38.4  | 0   | 176 | NA |
| TCGA-Q9-A6FW | 11.4831619 | 2.5092292 | 2.9276698 | 2 | 1 | ESCA | 7.82  | 0   | 193 | NA |
| TCGA-R6-A8W5 | 12.1535578 | 2.1827932 | 1.1620933 | 2 | 1 | ESCA | 15.8  | 1   | 96  | NA |
| TCGA-2H-A9GJ | 14.3676604 | 2.9640991 | 2.2857766 | 2 | 1 | ESCA | 58.5  | 1   | 102 | NA |
| TCGA-2H-A9GM | 12.0386018 | -0.289206 | 1.3461395 | 2 | 1 | ESCA | 13.9  | 1   | 94  | NA |
| TCGA-V5-A7RE | 13.4976436 | 1.5619956 | 0.9761872 | 2 | 1 | ESCA | 16.4  | 0   | 198 | NA |
| TCGA-2H-A9GH | 13.4331103 | 2.6784176 | 2.0941679 | 2 | 1 | ESCA | 31.2  | 1   | 110 | NA |
| TCGA-K4-A3WV | #####      | #####     | #####     | 2 | 1 | BLCA | 21    | 0   | 59  | 12 |
| TCGA-DK-AA6V | #####      | #####     | #####     | 2 | 1 | BLCA | 52    | 0   | NA  | NA |
| TCGA-FJ-A3Z9 | #####      | #####     | #####     | 2 | 1 | BLCA | 13    | 1   | NA  | NA |
| TCGA-GC-A3RE | #####      | #NUM!     | #####     | 2 | 1 | BLCA | 19    | 0   | 140 | 39 |
| TCGA-E7-A4XJ | #####      | #####     | #####     | 2 | 1 | BLCA | 2     | 1   | NA  | NA |
| TCGA-G2-A3IE | #####      | #NUM!     | #####     | 2 | 1 | BLCA | 20    | 1   | 341 | 79 |
| TCGA-FJ-A3ZF | #####      | #####     | #####     | 2 | 1 | BLCA | 17    | 0   | 220 | 45 |
| TCGA-BL-A13I | #####      | #####     | #####     | 2 | 1 | BLCA | 7     | 1   | 93  | 17 |
| TCGA-UY-A9PA | #####      | #####     | #####     | 2 | 1 | BLCA | 35    | 0   | NA  | NA |
| TCGA-GC-A3OC | #####      | #####     | #####     | 2 | 1 | BLCA | 16    | 0   | 95  | 22 |
| TCGA-GD-A3OC | #####      | #NUM!     | #####     | 2 | 1 | BLCA | 3     | 0   | 108 | 23 |
| TCGA-E7-A5KF | #####      | #####     | #####     | 2 | 1 | BLCA | 1     | 0   | NA  | NA |
| TCGA-2F-A9KP | #####      | #####     | #####     | 2 | 1 | BLCA | 12    | 1   | NA  | NA |
| TCGA-FJ-A871 | #####      | #####     | #####     | 2 | 1 | BLCA | 9     | 1   | NA  | NA |
| TCGA-BT-A20U | #####      | #####     | #####     | 2 | 1 | BLCA | 15    | 1   | 81  | 12 |
| TCGA-XF-AAMX | #####      | #####     | #####     | 2 | 1 | BLCA | 7     | 1   | NA  | NA |
| TCGA-ZF-AA5N | #####      | #####     | #####     | 2 | 1 | BLCA | 6     | 1   | NA  | NA |
| TCGA-FD-A5BR | #####      | #####     | #####     | 2 | 1 | BLCA | 27    | 0   | NA  | NA |
| TCGA-J9-A8CM | 7.746305   | 0.135272  | 2.594716  | 2 | 1 | PRAD | 15.21 | 0.0 | NA  | NA |
| TCGA-J4-A83M | 7.667546   | 0.754631  | 2.562010  | 2 | 1 | PRAD | 17.84 | 0.0 | NA  | NA |
| TCGA-V1-A8WL | 7.803766   | 0.265317  | 2.435279  | 2 | 1 | PRAD | 63.99 | 0.0 | NA  | NA |
| TCGA-EJ-7788 | 7.653854   | 0.007770  | 2.422879  | 2 | 1 | PRAD | 28.22 | 0.0 | 34  | 9  |
| TCGA-HC-8257 | 7.713346   | -0.311882 | 2.010135  | 2 | 1 | PRAD | 23.85 | 0.0 | 46  | 10 |
| TCGA-G9-6367 | 7.822113   | 0.838024  | 1.975553  | 2 | 1 | PRAD | 40.14 | 0.0 | 11  | 2  |
| TCGA-KK-A6E6 | 7.706771   | -0.151218 | 1.848794  | 2 | 1 | PRAD | ####  | 0.0 | 39  | 5  |
| TCGA-KK-A6E2 | 7.716414   | 0.999423  | 1.847432  | 2 | 1 | PRAD | ####  | 0.0 | 43  | 4  |
| TCGA-HC-8264 | 7.816762   | 0.794512  | 1.642466  | 2 | 1 | PRAD | 1.58  | 0.0 | 36  | 6  |
| TCGA-J4-8198 | 7.582699   | -0.114972 | 1.621946  | 2 | 1 | PRAD | 20.17 | 0.0 | 33  | 3  |
| TCGA-HC-8266 | 7.632382   | 0.649478  | 1.234440  | 2 | 1 | PRAD | 15.54 | 0.0 | 29  | 6  |
| TCGA-G9-6371 | 7.861775   | #NUM!     | 1.232538  | 2 | 1 | PRAD | 40.28 | 0.0 | 33  | 8  |
| TCGA-G9-7509 | 7.922569   | 0.360308  | 1.097274  | 2 | 1 | PRAD | 52.89 | 0.0 | NA  | NA |
| TCGA-HC-A76X | 7.842729   | 0.258447  | 1.065779  | 2 | 1 | PRAD | 4.93  | 0.0 | NA  | NA |
| TCGA-EJ-5542 | 7.791972   | -0.100685 | 0.899330  | 2 | 1 | PRAD | 49.70 | 0.0 | 39  | 6  |
| TCGA-EJ-7321 | 7.718927   | 0.346758  | 0.761796  | 2 | 1 | PRAD | 27.07 | 0.0 | 48  | 7  |
| TCGA-EJ-7314 | 7.785951   | -1.582555 | 0.739330  | 2 | 1 | PRAD | 37.78 | 0.0 | 63  | 14 |

|              |            |           |            |   |   |       |       |     |      |      |
|--------------|------------|-----------|------------|---|---|-------|-------|-----|------|------|
| TCGA-EJ-A7NF | 7.582364   | 0.956651  | 0.541614   | 2 | 1 | PRAD  | 8.21  | 0.0 | NA   | NA   |
| TCGA-EJ-A8FS | 7.970266   | -1.295836 | 0.289244   | 2 | 1 | PRAD  | 8.74  | 0.0 | NA   | NA   |
| TCGA-EJ-7783 | 7.767191   | -0.712173 | 0.287697   | 2 | 1 | PRAD  | 25.85 | 0.0 | 78   | 4    |
| TCGA-LB-A7SX | 9.7366     | 2.5923    | 1.4768     | 2 | 1 | PAAD  | 12.91 | 1.0 | 130  | NA   |
| TCGA-3E-AAAZ | 10.0895    | 1.9029    | 1.3884     | 2 | 1 | PAAD  | 71.68 | 1.0 | 72   | NA   |
| TCGA-US-A77G | 10.2465    | 1.8684    | 2.1903     | 2 | 1 | PAAD  | 0.39  | 1.0 | 90   | NA   |
| TCGA-S4-A8RP | 10.0637    | 1.6673    | 1.8897     | 2 | 1 | PAAD  | 23.06 | 1.0 | 59   | NA   |
| TCGA-2J-AABA | 10.0609    | 1.3249    | 1.3249     | 2 | 1 | PAAD  | 19.94 | 1.0 | 48   | NA   |
| TCGA-3A-A9IZ | 9.9559     | 1.1574    | 1.5724     | 2 | 1 | PAAD  | 10.12 | 1.0 | 76   | NA   |
| TCGA-OE-A75W | 9.7275     | -0.0101   | 1.3119     | 2 | 1 | PAAD  | 8.77  | 1.0 | 167  | NA   |
| TCGA-SX-A7SU | 8.284186   | 0.136846  | 1.458802   | 2 | 1 | KIRP  | 44    | 0.0 | NA   | NA   |
| TCGA-MH-A55Z | 8.278425   | 0.121014  | 2.121082   | 2 | 1 | KIRP  | 28    | 0.0 | 55   | 27   |
| TCGA-MH-A55V | 8.272454   | -0.266559 | -0.266559  | 2 | 1 | KIRP  | 34    | 0.0 | 90   | 23   |
| TCGA-BQ-5877 | 8.440257   | -0.819091 | 0.180784   | 2 | 1 | KIRP  | 9     | 1.0 | 26   | 17   |
| TCGA-SX-A7SM | 8.405843   | -0.825466 | -0.825466  | 2 | 1 | KIRP  | 12    | 1.0 | NA   | NA   |
| TCGA-BQ-7048 | 8.814087   | -0.836761 | -0.836785  | 2 | 1 | KIRP  | 93    | 0.0 | 32   | 18   |
| TCGA-A4-7287 | 9.424676   | -0.980512 | -0.980512  | 2 | 1 | KIRP  | 20    | 1.0 | 77   | 8    |
| TCGA-O9-A75Z | 9.345003   | -1.292299 | 0.707790   | 2 | 1 | KIRP  | 15    | 0.0 | 85   | NA   |
| TCGA-G7-6789 | 8.422163   | -1.301870 | -0.302048  | 2 | 1 | KIRP  | 4     | 1.0 | 31   | 4    |
| TCGA-UZ-A9PU | 8.539816   | -1.370717 | -1.370751  | 2 | 1 | KIRP  | 31    | 1.0 | #N/A | NA   |
| TCGA-B9-4113 | 8.220271   | -1.416196 | -0.416404  | 2 | 1 | KIRP  | 50    | 1.0 | 65   | 19   |
| TCGA-SX-A71S | 8.975773   | #NUM!     | -1.405834  | 2 | 1 | KIRP  | 49    | 0.0 | NA   | NA   |
| TCGA-BQ-7058 | 8.389710   | #NUM!     | 0.893432   | 2 | 1 | KIRP  | 11    | 1.0 | 36   | 16   |
| TCGA-AA-3710 | #####      | #####     | #####      | 2 | 1 | Colon | 27    | 0.0 | #N/A | #N/A |
| TCGA-AA-3681 | #####      | #####     | #####      | 2 | 1 | Colon | 6     | 0.0 | #N/A | #N/A |
| TCGA-QG-A5YV | #####      | #####     | #####      | 2 | 1 | Colon | 43    | 0.0 | NA   | NA   |
| TCGA-AD-6895 | #####      | #####     | #####      | 2 | 1 | Colon | 25    | 0.0 | 643  | NA   |
| TCGA-A6-2678 | #####      | #####     | #####      | 2 | 1 | Colon | 42    | 0.0 | #N/A | #N/A |
| TCGA-CM-6680 | #####      | #####     | #####      | 2 | 1 | Colon | 12    | 0.0 | 60   | NA   |
| TCGA-CM-6677 | #####      | #####     | #####      | 2 | 1 | Colon | 11    | 0.0 | 51   | NA   |
| TCGA-CK-6747 | #####      | #NUM!     | #####      | 2 | 1 | Colon | 83    | 0.0 | NA   | NA   |
| TCGA-CM-6674 | #####      | #####     | #####      | 2 | 1 | Colon | 13    | 0.0 | 325  | NA   |
| TCGA-D5-6931 | #####      | #####     | #####      | 2 | 1 | Colon | 12    | 0.0 | 111  | NA   |
| TCGA-NH-A6GA | #####      | #####     | #####      | 2 | 1 | Colon | 10    | 1.0 | NA   | NA   |
| TCGA-AA-3864 | #####      | #####     | #####      | 2 | 1 | Colon | 53    | 0.0 | #N/A | #N/A |
| TCGA-A6-6648 | #####      | #####     | #####      | 2 | 1 | Colon | 25    | 0.0 | 31   | NA   |
| TCGA-CK-4950 | #####      | #####     | #####      | 2 | 1 | Colon | 85    | 0.0 | 142  | NA   |
| TCGA-F4-6856 | #####      | #####     | #####      | 2 | 1 | Colon | 35    | 0.0 | 444  | NA   |
| TCGA-CK-6751 | #####      | #####     | #####      | 2 | 1 | Colon | 124   | 0.0 | NA   | NA   |
| TCGA-G4-6322 | #####      | #NUM!     | #####      | 2 | 1 | Colon | 26    | 0.0 | 31   | NA   |
| TCGA-06-5859 | 7.5654     | -1.1659   | 2.4191     | 4 | 1 | GBM   | 5     | 0.0 | 33   | 3    |
| TCGA-49-6761 | 9.24327202 | 8.3308369 | 2.2362783  | 1 | 2 | LUAD  | 12    | 0   | 158  | NA   |
| TCGA-05-5429 | 12.3698286 | 8.3213757 | 1.0005409  | 1 | 2 | LUAD  | 9     | 1   | 36   | 5    |
| TCGA-55-A491 | 10.7258985 | 8.3168111 | 0.1469289  | 1 | 2 | LUAD  | 21    | 0   | NA   | NA   |
| TCGA-75-5125 | 9.24503574 | 7.6907189 | 0.1973496  | 1 | 2 | LUAD  | 67    | 1   | NA   | 48   |
| TCGA-44-A4SS | 10.6168447 | 5.685594  | 0.1686164  | 1 | 2 | LUAD  | 14    | 0   | NA   | NA   |
| TCGA-55-8089 | 9.7653595  | 5.4460107 | 0.9298137  | 1 | 2 | LUAD  | 23    | 1   | NA   | NA   |
| TCGA-44-7661 | 9.1131608  | 5.4078337 | 2.4485098  | 1 | 2 | LUAD  | 18    | 1   | NA   | NA   |
| TCGA-05-4434 | 9.31798517 | 5.0980346 | 2.3443399  | 1 | 2 | LUAD  | 15    | 1   | NA   | 8    |
| TCGA-91-A4BC | 9.15678405 | 5.0118208 | 1.1765653  | 1 | 2 | LUAD  | 1     | 0   | NA   | NA   |
| TCGA-50-6592 | 10.5083256 | 5.0069869 | 0.7636495  | 1 | 2 | LUAD  | 26    | 1   | NA   | 46   |
| TCGA-35-4123 | 9.91740859 | 5.0006711 | 1.4885664  | 1 | 2 | LUAD  | 6     | 0   | NA   | 30   |
| TCGA-38-4629 | 9.12310579 | 4.8523959 | -0.4774219 | 1 | 2 | LUAD  | 28    | 1   | NA   | 46   |
| TCGA-50-6673 | 10.7292975 | 4.8148754 | 3.1097667  | 1 | 2 | LUAD  | 1     | 1   | 54   | NA   |

|              |            |           |            |   |   |      |       |     |     |     |
|--------------|------------|-----------|------------|---|---|------|-------|-----|-----|-----|
| TCGA-50-5941 | 9.40460859 | 4.7929136 | -3.1613951 | 1 | 2 | LUAD | 48    | 0   | 354 | 52  |
| TCGA-86-8075 | 9.96631115 | 4.7076385 | 2.3835965  | 1 | 2 | LUAD | 23    | 1   | NA  | NA  |
| TCGA-69-7974 | 9.64360474 | 4.6704478 | 1.3666607  | 1 | 2 | LUAD | 6     | 0   | NA  | NA  |
| TCGA-91-6835 | 9.40654022 | 4.6305854 | 2.0793269  | 1 | 2 | LUAD | 3     | 0   | 87  | 15  |
| TCGA-50-5936 | 9.5978318  | 4.6233764 | 1.7990583  | 1 | 2 | LUAD | 8     | 1   | 111 | 16  |
| TCGA-55-7574 | 9.10745197 | 4.5979185 | 3.1144403  | 1 | 2 | LUAD | 33    | 1   | 248 | NA  |
| TCGA-MP-A4T9 | 9.25499221 | 4.5715985 | 2.6508932  | 1 | 2 | LUAD | 42    | 1   | NA  | NA  |
| TCGA-99-8033 | 9.15687299 | 4.568735  | 1.129316   | 1 | 2 | LUAD | 22    | 1   | NA  | NA  |
| TCGA-MP-A4T8 | 9.36906874 | 4.4965295 | 0.7635306  | 1 | 2 | LUAD | 5     | 1   | NA  | NA  |
| TCGA-62-A46S | 9.22581433 | 4.3731512 | 2.6508059  | 1 | 2 | LUAD | 54    | 1   | NA  | NA  |
| TCGA-MP-A4TC | 9.08955445 | 4.2407364 | 3.0866768  | 1 | 2 | LUAD | 2     | 1   | NA  | NA  |
| TCGA-44-6779 | 9.22477001 | 4.2165162 | -1.9982122 | 1 | 2 | LUAD | 16    | 1   | 98  | 27  |
| TCGA-05-4420 | 9.85581981 | 4.1385622 | 1.947726   | 1 | 2 | LUAD | 30    | 0   | 254 | 36  |
| TCGA-55-6968 | 9.3282037  | 7.9425425 | 0.2525004  | 1 | 2 | LUAD | 42    | 1   | NA  | NA  |
| TCGA-91-6829 | 9.14181305 | 7.5231012 | 1.6567343  | 1 | 2 | LUAD | 41    | 1   | 558 | 69  |
| TCGA-35-4122 | 10.8503196 | 7.1434865 | 0.2010065  | 1 | 2 | LUAD | 7     | 0   | NA  | 25  |
| TCGA-69-7978 | 9.47575023 | 6.5965485 | 0.4101348  | 1 | 2 | LUAD | 4     | 0   | NA  | NA  |
| TCGA-97-A4LX | 9.11842919 | 6.0724619 | 2.2605075  | 1 | 2 | LUAD | 20    | 0   | NA  | NA  |
| TCGA-55-6979 | 10.0303681 | 5.779758  | 1.5238329  | 1 | 2 | LUAD | 8     | 1   | 143 | NA  |
| TCGA-05-4398 | 9.51355719 | 5.7231793 | 2.650112   | 1 | 2 | LUAD | 47    | 0   | 667 | 114 |
| TCGA-MP-A4TI | 9.3283101  | 5.652428  | 2.5940684  | 1 | 2 | LUAD | 14    | 1   | NA  | NA  |
| TCGA-55-8208 | 9.4183684  | 5.6263247 | 0.5299009  | 1 | 2 | LUAD | 22    | 0   | NA  | NA  |
| TCGA-53-7624 | 9.8264248  | 5.5638439 | #NUM!      | 1 | 2 | LUAD | 34    | 1   | NA  | NA  |
| TCGA-55-1594 | 9.16918428 | 5.4061965 | 1.2860768  | 1 | 2 | LUAD | 39    | 0   | 190 | 43  |
| TCGA-95-7944 | 9.70382779 | 5.3315024 | 1.9237007  | 1 | 2 | LUAD | 12    | 0   | NA  | NA  |
| TCGA-91-6848 | 10.7034685 | 5.2942425 | 1.6722488  | 1 | 2 | LUAD | 7     | 0   | NA  | NA  |
| TCGA-44-2668 | 9.61297606 | 5.221287  | -3.050861  | 1 | 2 | LUAD | 25    | 1   | NA  | 48  |
| TCGA-05-4432 | 9.641864   | 5.2112194 | 2.2396363  | 1 | 2 | LUAD | 25    | 0   | 585 | 103 |
| TCGA-55-7728 | 10.102822  | 5.1903513 | 2.8199788  | 1 | 2 | LUAD | 23    | 0   | 95  | NA  |
| TCGA-55-6978 | 9.87936632 | 4.9450889 | 1.08181    | 1 | 2 | LUAD | 6     | 1   | 36  | NA  |
| TCGA-86-7954 | 9.30756807 | 4.8703346 | 1.0792313  | 1 | 2 | LUAD | 20    | 0   | NA  | NA  |
| TCGA-55-6975 | 9.87985241 | 4.6901215 | 0.9504908  | 1 | 2 | LUAD | 4     | 1   | NA  | NA  |
| TCGA-05-4433 | 10.2014299 | 4.4168587 | 2.2409066  | 1 | 2 | LUAD | 24    | 0   | 38  | 11  |
| TCGA-L9-A743 | 9.14497657 | 4.3886201 | 2.9676593  | 1 | 2 | LUAD | 22    | 0   | NA  | NA  |
| TCGA-55-6642 | 9.15203061 | 4.3356598 | 0.647729   | 1 | 2 | LUAD | 80    | 0   | 120 | 38  |
| TCGA-49-4514 | 9.55126466 | 4.2903625 | 1.9165187  | 1 | 2 | LUAD | 56    | 0   | 275 | 49  |
| TCGA-44-6145 | 9.89277683 | 4.1906338 | -3.3594901 | 1 | 2 | LUAD | 20    | 0   | 262 | 45  |
| TCGA-50-6595 | 9.64784679 | 4.1861812 | 0.7311919  | 1 | 2 | LUAD | 6     | 1   | 104 | 33  |
| TCGA-93-A4JQ | 9.82192752 | 4.173245  | 1.4892501  | 1 | 2 | LUAD | 17    | 0   | NA  | NA  |
| TCGA-NJ-A55O | 11.122737  | 4.1511639 | 1.8496951  | 1 | 2 | LUAD | 0     | 0   | NA  | NA  |
| TCGA-05-5420 | 9.52771349 | 5.9589802 | 2.5380787  | 1 | 2 | LUAD | 15    | 0   | 93  | 15  |
| TCGA-97-8176 | 10.3313078 | 5.6473401 | 2.2396302  | 1 | 2 | LUAD | 15    | 1   | NA  | NA  |
| TCGA-MP-A4TA | 9.91393934 | 5.201259  | 1.085751   | 1 | 2 | LUAD | 31    | 1   | NA  | NA  |
| TCGA-44-6774 | 9.63057112 | 5.0548923 | 2.0774994  | 1 | 2 | LUAD | 22    | 0   | 270 | 30  |
| TCGA-78-8660 | 9.27235365 | 4.5929395 | 1.3075859  | 1 | 2 | LUAD | 11    | 1   | NA  | NA  |
| TCGA-86-8055 | 9.67562327 | 4.5737574 | 2.5492897  | 1 | 2 | LUAD | 4     | 1   | NA  | NA  |
| TCGA-78-7160 | 9.17742866 | 4.2856685 | 1.3223031  | 1 | 2 | LUAD | 23    | 1   | 33  | NA  |
| TCGA-DS-A1OC | #####      | #####     | #####      | 1 | 2 | CESC | ####  | 0.0 | NA  | 46  |
| TCGA-VS-AA62 | #####      | #####     | #####      | 1 | 2 | CESC | 15.41 | 1.0 | NA  | NA  |
| TCGA-C5-A0TN | #####      | #####     | #####      | 1 | 2 | CESC | 11.43 | 1.0 | 57  | 3   |
| TCGA-DG-A2KH | #####      | #####     | #####      | 1 | 2 | CESC | 1.12  | 0.0 | 60  | 10  |
| TCGA-UC-A7PD | #####      | #####     | #####      | 1 | 2 | CESC | 11.66 | 1.0 | 26  | 7   |
| TCGA-C5-A1MI | #####      | #####     | #####      | 1 | 2 | CESC | 35.58 | 1.0 | 103 | 6   |
| TCGA-C5-A2M1 | #####      | #####     | #####      | 1 | 2 | CESC | 38.40 | 0.0 | 83  | 15  |



|              |          |         |          |   |   |      |       |     |      |    |
|--------------|----------|---------|----------|---|---|------|-------|-----|------|----|
| TCGA-DG-A2KJ | #####    | #####   | #####    | 1 | 2 | CESC | 95.04 | 0.0 | 0    | 0  |
| TCGA-GH-A9DA | #####    | #####   | #####    | 1 | 2 | CESC | 17.74 | 0.0 | NA   | NA |
| TCGA-EK-A2R8 | #####    | #####   | #####    | 1 | 2 | CESC | 1.45  | 0.0 | 250  | 42 |
| TCGA-VS-A9UL | #####    | #####   | #####    | 1 | 2 | CESC | 14.52 | 1.0 | NA   | NA |
| TCGA-Q1-A73P | #####    | #####   | #####    | 1 | 2 | CESC | 15.87 | 0.0 | 211  | 19 |
| TCGA-EX-A8YF | #####    | #####   | #####    | 1 | 2 | CESC | 15.54 | 0.0 | NA   | NA |
| TCGA-EK-A2H1 | #####    | #####   | #####    | 1 | 2 | CESC | 26.25 | 0.0 | 28   | 10 |
| TCGA-C5-A1BN | #####    | #####   | #NUM!    | 1 | 2 | CESC | 5.45  | 1.0 | 121  | 14 |
| TCGA-C5-A2LS | #####    | #####   | #NUM!    | 1 | 2 | CESC | 44.19 | 0.0 | 41   | 9  |
| TCGA-FU-A2QC | #####    | #####   | #NUM!    | 1 | 2 | CESC | 19.02 | 0.0 | 73   | 12 |
| TCGA-32-4213 | 7.8763   | 1.4840  | 0.4840   | 1 | 2 | GBM  | 20    | 0.0 | 38   | 15 |
| TCGA-06-2565 | 7.2450   | 2.5735  | 0.3511   | 1 | 2 | GBM  | 17    | 1.0 | 31   | 11 |
| TCGA-27-1837 | 7.3413   | 2.5547  | 0.2328   | 1 | 2 | GBM  | 14    | 1.0 | 9    | 7  |
| TCGA-16-0846 | 8.0356   | 3.8972  | 0.1967   | 1 | 2 | GBM  | 4     | 1.0 | 16   | 11 |
| TCGA-28-5220 | 7.4502   | 2.0008  | 0.1935   | 1 | 2 | GBM  | 13    | 1.0 | 8    | 8  |
| TCGA-27-2519 | 7.1937   | -0.8938 | 0.1062   | 1 | 2 | GBM  | 18    | 1.0 | 29   | 6  |
| TCGA-06-5410 | 8.1146   | 4.2804  | 0.0325   | 1 | 2 | GBM  | 4     | 1.0 | 6    | 2  |
| TCGA-06-0882 | 7.7596   | 5.2837  | -0.0914  | 1 | 2 | GBM  | 21    | 1.0 | 22   | 6  |
| TCGA-19-2629 | 7.7411   | 1.3204  | -0.2645  | 1 | 2 | GBM  | 24    | 1.0 | 47   | 24 |
| TCGA-06-5416 | 7.4098   | 5.5518  | -0.4255  | 1 | 2 | GBM  | 7     | 0.0 | 2088 | NA |
| TCGA-16-1045 | 7.6255   | 3.4874  | -0.6825  | 1 | 2 | GBM  | 29    | 1.0 | 54   | 21 |
| TCGA-28-5207 | 7.6268   | 3.0180  | -0.8890  | 1 | 2 | GBM  | 11    | 1.0 | 32   | 12 |
| TCGA-28-1747 | 7.6410   | 2.1366  | -1.0333  | 1 | 2 | GBM  | 3     | 1.0 | 33   | 7  |
| TCGA-27-1834 | 7.8410   | 4.0060  | #NUM!    | 1 | 2 | GBM  | 41    | 1.0 | 10   | 10 |
| TCGA-28-5215 | 7.4643   | 3.5927  | #NUM!    | 1 | 2 | GBM  | 11    | 1.0 | 23   | 8  |
| TCGA-06-2557 | 8.0279   | 3.1918  | #NUM!    | 1 | 2 | GBM  | 1     | 1.0 | 28   | 13 |
| TCGA-06-5408 | 7.6286   | 2.6286  | #NUM!    | 1 | 2 | GBM  | 12    | 1.0 | 29   | 7  |
| TCGA-26-5136 | 7.1770   | 1.5929  | #NUM!    | 1 | 2 | GBM  | 19    | 1.0 | 33   | 12 |
| TCGA-B6-A0X1 | 10.20320 | 6.88001 | 2.15606  | 1 | 2 | BRCA | 244.9 | 1   | 46   | 3  |
| TCGA-E2-A1LK | 9.37949  | 6.40928 | 2.29288  | 1 | 2 | BRCA | 8.7   | 1   | 31   | 2  |
| TCGA-BH-A18Q | 8.80471  | 6.17885 | 1.61733  | 1 | 2 | BRCA | 55.6  | 1   | 57   | 20 |
| TCGA-BH-A1FM | 9.06749  | 5.68151 | -6.04549 | 1 | 2 | BRCA | 45.6  | 1   | 30   | 6  |
| TCGA-BH-A1FC | 9.05028  | 5.61829 | -0.21803 | 1 | 2 | BRCA | 114.1 | 1   | 57   | 12 |
| TCGA-E9-A1NF | 9.36888  | 5.29830 | 1.61055  | 1 | 2 | BRCA | 35.2  | 1   | 37   | 6  |
| TCGA-AR-A256 | 10.29299 | 4.87855 | -0.16012 | 1 | 2 | BRCA | 93.8  | 1   | 141  | 32 |
| TCGA-A8-A08L | 8.72588  | 4.86569 | #NUM!    | 1 | 2 | BRCA | 10.0  | 1   | 159  | 38 |
| TCGA-B6-A3ZX | 10.23056 | 4.86034 | #NUM!    | 1 | 2 | BRCA | 37.8  | 1   | 36   | NA |
| TCGA-BH-A1F0 | 10.65685 | 4.76330 | 1.09047  | 1 | 2 | BRCA | 25.8  | 1   | 15   | 1  |
| TCGA-AR-A2LH | 8.80734  | 4.66391 | 2.51104  | 1 | 2 | BRCA | 20.2  | 1   | 18   | NA |
| TCGA-AQ-A7U7 | 9.39464  | 4.59027 | 2.14965  | 1 | 2 | BRCA | 19.2  | 1   | NA   | NA |
| TCGA-AR-A1AT | 8.90418  | 4.57294 | -3.31043 | 1 | 2 | BRCA | 41.8  | 1   | 20   | 5  |
| TCGA-BH-A1EC | 9.08659  | 4.54376 | 2.35575  | 1 | 2 | BRCA | 91.9  | 1   | 26   | 4  |
| TCGA-BH-A0BF | 9.15930  | 4.44957 | 0.91484  | 1 | 2 | BRCA | 43.5  | 1   | 21   | 7  |
| TCGA-BH-A209 | 9.52202  | 4.40429 | #NUM!    | 1 | 2 | BRCA | 130.1 | 1   | 53   | 9  |
| TCGA-A2-A0T2 | 9.10245  | 4.32035 | 0.40047  | 1 | 2 | BRCA | 8.4   | 1   | 37   | 6  |
| TCGA-BH-A18M | 9.04745  | 4.11660 | 1.52713  | 1 | 2 | BRCA | 72.5  | 1   | 11   | 2  |
| TCGA-B6-A0IN | 8.71403  | 4.06686 | 0.32442  | 1 | 2 | BRCA | 84.5  | 1   | 30   | 2  |
| TCGA-BH-A203 | 8.80062  | 3.93597 | #NUM!    | 1 | 2 | BRCA | 38.6  | 1   | 42   | 8  |
| TCGA-B6-A0WY | 8.94162  | 3.73831 | #NUM!    | 1 | 2 | BRCA | 113.7 | 1   | 12   | 5  |
| TCGA-A2-A04P | 8.78214  | 3.73299 | -4.52583 | 1 | 2 | BRCA | 18.0  | 1   | 85   | 25 |
| TCGA-E2-A1LE | 8.73696  | 3.67558 | -6.19179 | 1 | 2 | BRCA | 28.9  | 1   | 53   | NA |
| TCGA-B6-A0IK | 8.70487  | 3.65441 | -3.12822 | 1 | 2 | BRCA | 18.8  | 1   | 110  | 24 |
| TCGA-E2-A15M | 9.11576  | 3.63066 | -0.15820 | 1 | 2 | BRCA | 11.0  | 1   | 90   | 15 |
| TCGA-BH-A18T | 11.08018 | 3.62602 | #NUM!    | 1 | 2 | BRCA | 7.4   | 1   | 55   | 17 |

|              |          |         |          |   |   |      |       |   |     |    |
|--------------|----------|---------|----------|---|---|------|-------|---|-----|----|
| TCGA-A8-A08T | 8.69178  | 3.56511 | -0.31545 | 1 | 2 | BRCA | 112.0 | 1 | 40  | 5  |
| TCGA-AR-A1AR | 9.43925  | 3.51197 | #NUM!    | 1 | 2 | BRCA | 17.2  | 1 | 40  | 14 |
| TCGA-AR-A5QC | 9.68854  | 3.50400 | 2.10541  | 1 | 2 | BRCA | 10.6  | 1 | 41  | NA |
| TCGA-BH-A18V | 9.04693  | 3.37017 | #NUM!    | 1 | 2 | BRCA | 51.1  | 1 | 142 | 35 |
| TCGA-AC-A62X | 8.74556  | 8.69320 | 0.39311  | 1 | 2 | BRCA | 13.7  | 0 | 47  | NA |
| TCGA-BH-A0DC | 8.80965  | 8.09684 | 2.43745  | 1 | 2 | BRCA | 67.0  | 0 | 23  | 12 |
| TCGA-AN-A0FL | 9.20171  | 7.76633 | -3.14982 | 1 | 2 | BRCA | 7.6   | 0 | 143 | 19 |
| TCGA-A2-A0YM | 9.20479  | 7.20905 | 1.78932  | 1 | 2 | BRCA | 31.7  | 0 | 57  | 9  |
| TCGA-AO-A0JM | 8.94151  | 7.03367 | -3.10867 | 1 | 2 | BRCA | 71.8  | 0 | 25  | 8  |
| TCGA-GM-A2DF | 9.11921  | 6.84704 | -0.91151 | 1 | 2 | BRCA | 72.0  | 0 | 91  | NA |
| TCGA-A8-A07R | 9.31540  | 6.73464 | #NUM!    | 1 | 2 | BRCA | 9.0   | 0 | 370 | 53 |
| TCGA-BH-A0WA | 8.94901  | 6.52632 | #NUM!    | 1 | 2 | BRCA | 23.0  | 0 | 66  | 13 |
| TCGA-E9-A1N8 | 11.20281 | 6.49852 | 1.26874  | 1 | 2 | BRCA | 34.1  | 0 | 24  | 4  |
| TCGA-LL-A73Y | 9.36050  | 6.08625 | 1.27893  | 1 | 2 | BRCA | 15.7  | 0 | NA  | NA |
| TCGA-E9-A1ND | 9.49722  | 6.08268 | -3.93346 | 1 | 2 | BRCA | 41.6  | 0 | 56  | 14 |
| TCGA-AO-A0J4 | 9.16125  | 6.02209 | #NUM!    | 1 | 2 | BRCA | 52.1  | 0 | 72  | 18 |
| TCGA-A8-A07U | 9.64258  | 6.00385 | -6.03410 | 1 | 2 | BRCA | 25.0  | 0 | 30  | 1  |
| TCGA-AR-A1AY | 10.08359 | 5.94085 | 1.09643  | 1 | 2 | BRCA | 33.7  | 0 | 39  | 8  |
| TCGA-EW-A2FF | 9.26452  | 5.89975 | -0.42210 | 1 | 2 | BRCA | 55.0  | 0 | 41  | NA |
| TCGA-E2-A150 | 8.88789  | 5.71588 | -4.77715 | 1 | 2 | BRCA | 63.6  | 0 | 37  | 4  |
| TCGA-C8-A12K | 10.78322 | 5.71352 | 0.74314  | 1 | 2 | BRCA | 0.0   | 0 | 77  | 13 |
| TCGA-S3-AA10 | 9.78554  | 5.62884 | -4.48294 | 1 | 2 | BRCA | 19.2  | 0 | NA  | NA |
| TCGA-E2-A1L7 | 8.98385  | 5.54886 | 1.30195  | 1 | 2 | BRCA | 60.3  | 0 | 57  | 16 |
| TCGA-AR-A1AJ | 9.52055  | 5.49741 | 1.62687  | 1 | 2 | BRCA | 100.9 | 0 | 21  | 3  |
| TCGA-A8-A07G | 9.07720  | 5.46595 | -0.19826 | 1 | 2 | BRCA | 19.0  | 0 | 44  | 6  |
| TCGA-A7-A26G | 9.60319  | 5.43709 | 1.05282  | 1 | 2 | BRCA | 23.7  | 0 | 36  | 7  |
| TCGA-BH-A0B7 | 9.09318  | 5.42148 | 0.91782  | 1 | 2 | BRCA | 84.1  | 0 | 19  | 1  |
| TCGA-AO-A124 | 10.13788 | 5.35385 | #NUM!    | 1 | 2 | BRCA | 115.2 | 0 | 113 | 25 |
| TCGA-AR-A1AW | 9.39790  | 5.32020 | #NUM!    | 1 | 2 | BRCA | 86.5  | 0 | 15  | 4  |
| TCGA-E9-A244 | 10.06380 | 5.30281 | #NUM!    | 1 | 2 | BRCA | 0.7   | 0 | 63  | 13 |
| TCGA-A2-A0CL | 9.16589  | 5.27708 | 2.20038  | 1 | 2 | BRCA | 99.0  | 0 | 17  | 3  |
| TCGA-A2-A0EY | 8.87488  | 5.26375 | -0.17054 | 1 | 2 | BRCA | 63.2  | 0 | 151 | 26 |
| TCGA-EW-A1PE | 9.41489  | 5.25017 | 2.51055  | 1 | 2 | BRCA | 20.0  | 0 | 108 | 25 |
| TCGA-EW-A1OV | 9.33153  | 5.22390 | 2.03419  | 1 | 2 | BRCA | 25.9  | 0 | 69  | 19 |
| TCGA-BH-A0RX | 9.87106  | 5.20695 | 1.96253  | 1 | 2 | BRCA | 5.6   | 0 | 14  | 7  |
| TCGA-BH-A8G0 | 8.89878  | 5.19238 | 1.74672  | 1 | 2 | BRCA | 21.8  | 0 | NA  | NA |
| TCGA-A2-A25F | 10.60235 | 5.14231 | 1.48370  | 1 | 2 | BRCA | 10.6  | 0 | 3   | 0  |
| TCGA-AQ-A04J | 8.97640  | 5.09614 | 0.45281  | 1 | 2 | BRCA | 26.9  | 0 | 44  | 7  |
| TCGA-D8-A73U | 9.72920  | 5.08074 | 1.19902  | 1 | 2 | BRCA | 16.2  | 0 | NA  | NA |
| TCGA-PL-A8LY | 9.67048  | 5.05290 | 2.08689  | 1 | 2 | BRCA | 0.3   | 0 | NA  | NA |
| TCGA-A2-A0D2 | 9.25214  | 5.05259 | -6.02938 | 1 | 2 | BRCA | 33.7  | 0 | 66  | 14 |
| TCGA-A2-A0T0 | 8.83564  | 5.04717 | 1.95692  | 1 | 2 | BRCA | 17.5  | 0 | 261 | 34 |
| TCGA-AN-A0FD | 9.22853  | 5.00590 | 0.52831  | 1 | 2 | BRCA | 6.4   | 0 | 32  | 5  |
| TCGA-AN-A0FJ | 9.17972  | 4.96038 | -2.92730 | 1 | 2 | BRCA | 8.0   | 0 | 71  | 22 |
| TCGA-E2-A1LB | 8.71902  | 4.94160 | -3.81522 | 1 | 2 | BRCA | 75.8  | 0 | 30  | 11 |
| TCGA-BH-A5J0 | 8.92339  | 4.93020 | 2.30080  | 1 | 2 | BRCA | 23.5  | 0 | 51  | NA |
| TCGA-E9-A2JT | 9.34704  | 4.86072 | 0.94067  | 1 | 2 | BRCA | 9.5   | 0 | 4   | NA |
| TCGA-EW-A1PE | 9.09752  | 4.85681 | -0.36517 | 1 | 2 | BRCA | 10.5  | 0 | 25  | 6  |
| TCGA-D8-A1Y3 | 10.72375 | 4.83386 | -7.95500 | 1 | 2 | BRCA | 14.1  | 0 | 40  | 14 |
| TCGA-D8-A1Y2 | 9.37526  | 4.81868 | #NUM!    | 1 | 2 | BRCA | 14.2  | 0 | 17  | 3  |
| TCGA-PL-A8LZ | 11.11066 | 4.81135 | 1.82993  | 1 | 2 | BRCA | 9.9   | 0 | NA  | NA |
| TCGA-AO-A128 | 9.96392  | 4.79546 | #NUM!    | 1 | 2 | BRCA | 106.7 | 0 | 718 | NA |
| TCGA-EW-A1OW | 9.31854  | 4.78835 | -4.20158 | 1 | 2 | BRCA | 22.8  | 0 | NA  | NA |
| TCGA-BH-A0GY | 8.80714  | 4.75546 | 1.33456  | 1 | 2 | BRCA | 30.3  | 0 | 40  | 8  |

|              |          |         |           |   |   |      |       |   |     |    |
|--------------|----------|---------|-----------|---|---|------|-------|---|-----|----|
| TCGA-AC-A23G | 9.08922  | 4.74937 | 2.02322   | 1 | 2 | BRCA | 73.8  | 0 | 19  | NA |
| TCGA-E9-A1NC | 9.61920  | 4.74918 | -4.40110  | 1 | 2 | BRCA | 39.5  | 0 | 137 | 9  |
| TCGA-A8-A0A7 | 9.35663  | 4.73929 | 2.04118   | 1 | 2 | BRCA | 1.0   | 0 | 70  | 14 |
| TCGA-E2-A1AZ | 9.79971  | 4.70330 | -2.74275  | 1 | 2 | BRCA | 76.5  | 0 | 38  | 11 |
| TCGA-AR-A254 | 9.29457  | 4.68289 | -0.54941  | 1 | 2 | BRCA | 85.6  | 0 | 28  | 5  |
| TCGA-AR-A255 | 8.89430  | 4.66093 | -0.39280  | 1 | 2 | BRCA | 71.0  | 0 | 45  | 5  |
| TCGA-E9-A22D | 8.94317  | 4.61974 | 1.54028   | 1 | 2 | BRCA | 41.0  | 0 | 12  | 3  |
| TCGA-AR-A0TP | 9.92300  | 4.59277 | -0.06655  | 1 | 2 | BRCA | 140.4 | 0 | NA  | 6  |
| TCGA-D8-A1JL | 9.93674  | 4.58527 | 0.30056   | 1 | 2 | BRCA | 20.1  | 0 | 74  | 12 |
| TCGA-EW-A1PF | 9.20246  | 4.58126 | #NUM!     | 1 | 2 | BRCA | 19.9  | 0 | 37  | 11 |
| TCGA-E2-A1II | 11.23583 | 4.56232 | -3.34198  | 1 | 2 | BRCA | 33.7  | 0 | 19  | 4  |
| TCGA-OL-A66I | 10.04010 | 4.56202 | 1.04403   | 1 | 2 | BRCA | 23.5  | 0 | 27  | NA |
| TCGA-C8-A1HJ | 8.93646  | 4.55049 | #NUM!     | 1 | 2 | BRCA | 0.2   | 0 | 89  | 21 |
| TCGA-E2-A1B6 | 9.69139  | 4.54939 | -1.21742  | 1 | 2 | BRCA | 28.5  | 0 | 8   | 2  |
| TCGA-A7-A3J0 | 8.78141  | 4.54320 | -0.55737  | 1 | 2 | BRCA | 10.3  | 0 | 34  | NA |
| TCGA-D8-A27F | 8.68913  | 4.47651 | 2.13675   | 1 | 2 | BRCA | 16.0  | 0 | 42  | 7  |
| TCGA-EW-A1J5 | 8.70612  | 4.42539 | 0.73923   | 1 | 2 | BRCA | 15.7  | 0 | 306 | 60 |
| TCGA-A8-A092 | 9.16439  | 4.41675 | -0.30063  | 1 | 2 | BRCA | 31.0  | 0 | 66  | 17 |
| TCGA-GM-A2DN | 9.33167  | 4.41329 | -8.30586  | 1 | 2 | BRCA | 101.5 | 0 | 16  | NA |
| TCGA-AR-A0TT | 9.21583  | 4.35493 | 1.70053   | 1 | 2 | BRCA | 108.9 | 0 | NA  | 11 |
| TCGA-D8-A13Z | 9.18129  | 4.34143 | 1.18696   | 1 | 2 | BRCA | 20.9  | 0 | 55  | 5  |
| TCGA-B6-A0RT | 9.60279  | 4.33090 | 1.60295   | 1 | 2 | BRCA | 89.4  | 0 | 11  | 5  |
| TCGA-E2-A159 | 9.10807  | 4.32699 | #NUM!     | 1 | 2 | BRCA | 25.0  | 0 | 111 | 37 |
| TCGA-A2-A0ST | 9.87391  | 4.32077 | 1.17064   | 1 | 2 | BRCA | 99.1  | 0 | 3   | 1  |
| TCGA-S3-AA17 | 8.87856  | 4.32021 | 1.17002   | 1 | 2 | BRCA | 13.9  | 0 | NA  | NA |
| TCGA-OL-A5D7 | 10.85152 | 4.31685 | -4.27481  | 1 | 2 | BRCA | 58.5  | 0 | 39  | NA |
| TCGA-C8-A27B | 10.20727 | 4.30167 | #NUM!     | 1 | 2 | BRCA | 14.4  | 0 | 114 | 28 |
| TCGA-EW-A3UC | 9.92456  | 4.29322 | 2.21909   | 1 | 2 | BRCA | 17.5  | 0 | 103 | NA |
| TCGA-BH-A0BN | 10.07780 | 4.27563 | #NUM!     | 1 | 2 | BRCA | 77.9  | 0 | 113 | 13 |
| TCGA-E9-A3QA | 10.23925 | 4.27409 | #NUM!     | 1 | 2 | BRCA | 30.2  | 0 | 51  | NA |
| TCGA-BH-A0H5 | 9.63152  | 4.26289 | 1.01706   | 1 | 2 | BRCA | 53.2  | 0 | 9   | 0  |
| TCGA-A8-A09I | 9.84741  | 4.25991 | #NUM!     | 1 | 2 | BRCA | 45.0  | 0 | 99  | 19 |
| TCGA-A2-A0YH | 9.52062  | 4.24891 | -12.70275 | 1 | 2 | BRCA | 21.6  | 0 | 47  | 15 |
| TCGA-AC-A62Y | 8.86397  | 4.24593 | -6.43222  | 1 | 2 | BRCA | 17.4  | 0 | 55  | NA |
| TCGA-AN-A0AR | 10.23079 | 4.24372 | -0.19436  | 1 | 2 | BRCA | 0.3   | 0 | 90  | 21 |
| TCGA-E2-A10F | 8.98646  | 4.23697 | -0.11034  | 1 | 2 | BRCA | 28.8  | 0 | 21  | NA |
| TCGA-E2-A1B5 | 9.20801  | 4.23071 | 0.07776   | 1 | 2 | BRCA | 32.3  | 0 | 23  | 6  |
| TCGA-EW-A1P7 | 9.59189  | 4.22695 | 1.56220   | 1 | 2 | BRCA | 30.1  | 0 | 7   | 1  |
| TCGA-E9-A22E | 9.21060  | 4.19566 | 2.02702   | 1 | 2 | BRCA | 41.7  | 0 | 66  | 12 |
| TCGA-AN-A0FN | 9.57858  | 4.15882 | 1.82716   | 1 | 2 | BRCA | 7.2   | 0 | 27  | 1  |
| TCGA-D8-A141 | 9.13343  | 4.12635 | -0.25656  | 1 | 2 | BRCA | 20.6  | 0 | 12  | 4  |
| TCGA-E2-A14R | 9.18013  | 4.11479 | 1.91157   | 1 | 2 | BRCA | 38.6  | 0 | 86  | 22 |
| TCGA-E9-A243 | 10.25114 | 4.11225 | #NUM!     | 1 | 2 | BRCA | 20.1  | 0 | 51  | 10 |
| TCGA-AN-A0AT | 9.57520  | 4.10307 | #NUM!     | 1 | 2 | BRCA | 0.3   | 0 | 91  | 17 |
| TCGA-AR-A0U4 | 10.08937 | 4.09337 | 0.00758   | 1 | 2 | BRCA | 107.1 | 0 | NA  | NA |
| TCGA-AR-A24S | 9.25035  | 4.02039 | #NUM!     | 1 | 2 | BRCA | 97.8  | 0 | 32  | 9  |
| TCGA-BH-A6R9 | 9.70005  | 4.01659 | 0.26253   | 1 | 2 | BRCA | 5.3   | 0 | NA  | NA |
| TCGA-A1-A0SI | 8.68814  | 3.96613 | 0.67400   | 1 | 2 | BRCA | 20.9  | 0 | 139 | 35 |
| TCGA-BH-A0B9 | 9.87939  | 3.96078 | #NUM!     | 1 | 2 | BRCA | 51.6  | 0 | 33  | 7  |
| TCGA-C8-A131 | 8.93817  | 3.95558 | 0.45734   | 1 | 2 | BRCA | 13.5  | 0 | 48  | 8  |
| TCGA-E2-A1IJ | 8.94588  | 3.95028 | 2.23729   | 1 | 2 | BRCA | 28.4  | 0 | 19  | 2  |
| TCGA-AR-A252 | 9.82909  | 3.94313 | -0.50596  | 1 | 2 | BRCA | 93.2  | 0 | 7   | 1  |
| TCGA-E2-A1IN | 8.90038  | 3.92615 | 1.06892   | 1 | 2 | BRCA | 22.2  | 0 | 138 | 22 |
| TCGA-E2-A1B1 | 9.73109  | 3.91111 | 1.47841   | 1 | 2 | BRCA | 87.2  | 0 | 9   | 4  |

|              |            |           |           |   |   |      |       |   |      |    |
|--------------|------------|-----------|-----------|---|---|------|-------|---|------|----|
| TCGA-EW-A1PC | 9.06613    | 3.90504   | 2.19123   | 1 | 2 | BRCA | 34.5  | 0 | 7    | 0  |
| TCGA-E2-A1LH | 9.01600    | 3.89021   | -2.58467  | 1 | 2 | BRCA | 106.7 | 0 | 122  | 18 |
| TCGA-A2-A25A | 8.84300    | 3.85811   | 1.87545   | 1 | 2 | BRCA | 107.6 | 0 | 81   | 10 |
| TCGA-E9-A22A | 9.11866    | 3.84326   | #NUM!     | 1 | 2 | BRCA | 39.1  | 0 | 26   | 4  |
| TCGA-A8-A09G | 9.30072    | 3.84133   | 1.73977   | 1 | 2 | BRCA | 0.0   | 0 | 189  | 44 |
| TCGA-A7-A0DA | 10.11794   | 3.82876   | #NUM!     | 1 | 2 | BRCA | 35.6  | 0 | 110  | 24 |
| TCGA-E9-A248 | 9.44061    | 3.82630   | #NUM!     | 1 | 2 | BRCA | 1.9   | 0 | 16   | 7  |
| TCGA-EW-A6SE | 10.73815   | 3.81797   | 0.96684   | 1 | 2 | BRCA | 25.0  | 0 | NA   | NA |
| TCGA-A8-A075 | 8.95270    | 3.81173   | -10.58727 | 1 | 2 | BRCA | 17.0  | 0 | 52   | 12 |
| TCGA-EW-A6SC | 8.72887    | 3.80823   | 1.69998   | 1 | 2 | BRCA | 33.2  | 0 | NA   | NA |
| TCGA-EW-A1J2 | 8.75791    | 3.80763   | 1.90744   | 1 | 2 | BRCA | 13.2  | 0 | 23   | 6  |
| TCGA-BH-A0W7 | 9.31057    | 3.79362   | 2.30788   | 1 | 2 | BRCA | 44.8  | 0 | 122  | 17 |
| TCGA-A2-A04T | 9.71808    | 3.78939   | #NUM!     | 1 | 2 | BRCA | 73.8  | 0 | 69   | NA |
| TCGA-C8-A12V | 10.23166   | 3.76665   | 2.38929   | 1 | 2 | BRCA | 12.6  | 0 | 12   | 1  |
| TCGA-B6-A0IO | 9.01351    | 3.76100   | #NUM!     | 1 | 2 | BRCA | 165.6 | 0 | 51   | NA |
| TCGA-BH-A0BC | 8.77448    | 3.75260   | 0.71584   | 1 | 2 | BRCA | 32.0  | 0 | 99   | 4  |
| TCGA-A2-A0CZ | 9.18290    | 3.74479   | 2.29233   | 1 | 2 | BRCA | 53.1  | 0 | 15   | 3  |
| TCGA-D8-A1XT | 9.01408    | 3.72867   | #NUM!     | 1 | 2 | BRCA | 16.6  | 0 | 34   | 5  |
| TCGA-BH-A0E6 | 9.03870    | 3.70678   | 1.84600   | 1 | 2 | BRCA | 9.6   | 0 | 45   | 9  |
| TCGA-AN-A0G0 | 10.73221   | 3.69268   | #NUM!     | 1 | 2 | BRCA | 0.5   | 0 | 35   | 3  |
| TCGA-JL-A3YW | 8.93896    | 3.68696   | 1.87403   | 1 | 2 | BRCA | 11.8  | 0 | 65   | NA |
| TCGA-E9-A1NE | 9.28181    | 3.68166   | 0.33464   | 1 | 2 | BRCA | 35.7  | 0 | 28   | 4  |
| TCGA-AR-A24U | 9.07776    | 3.68154   | -0.16214  | 1 | 2 | BRCA | 102.8 | 0 | 15   | 6  |
| TCGA-A7-A4SD | 9.55629    | 3.67867   | 1.95867   | 1 | 2 | BRCA | 14.5  | 0 | 72   | NA |
| TCGA-A2-A0EV | 8.79932    | 3.66967   | -0.03924  | 1 | 2 | BRCA | 31.8  | 0 | 53   | 7  |
| TCGA-A7-A0DB | 8.98260    | 3.65596   | -3.61971  | 1 | 2 | BRCA | 33.1  | 0 | 94   | 3  |
| TCGA-AO-A0JD | 9.79635    | 3.64557   | -5.11829  | 1 | 2 | BRCA | 71.9  | 0 | 82   | 15 |
| TCGA-D8-A1XM | 8.80531    | 3.64315   | -0.71269  | 1 | 2 | BRCA | 17.7  | 0 | 39   | 12 |
| TCGA-C8-A12O | 8.82427    | 3.59551   | #NUM!     | 1 | 2 | BRCA | 12.6  | 0 | 26   | 9  |
| TCGA-EW-A1P5 | 8.84796    | 3.59167   | -5.63451  | 1 | 2 | BRCA | 23.1  | 0 | 13   | 3  |
| TCGA-BH-A202 | 8.71698    | 3.57202   | 0.50382   | 1 | 2 | BRCA | 26.1  | 0 | 24   | 11 |
| TCGA-AR-A1AX | 9.17875    | 3.56434   | 0.84565   | 1 | 2 | BRCA | 86.4  | 0 | 12   | 6  |
| TCGA-E2-A1LS | 8.83954    | 3.55256   | -4.00857  | 1 | 2 | BRCA | 52.7  | 0 | 60   | 13 |
| TCGA-A2-A0CX | 8.86839    | 3.55022   | 1.25219   | 1 | 2 | BRCA | 56.8  | 0 | 153  | 54 |
| TCGA-A2-A1G1 | 10.16314   | 3.53021   | #NUM!     | 1 | 2 | BRCA | 19.2  | 0 | 22   | 8  |
| TCGA-D8-A27N | 8.74722    | 3.51712   | #NUM!     | 1 | 2 | BRCA | 17.0  | 0 | 37   | 7  |
| TCGA-D8-A147 | 9.89047    | 3.50707   | #NUM!     | 1 | 2 | BRCA | 19.2  | 0 | 96   | 32 |
| TCGA-A1-A0SN | 9.27067    | 3.50111   | #NUM!     | 1 | 2 | BRCA | 39.3  | 0 | 39   | 5  |
| TCGA-A2-A4S2 | 8.75261    | 3.49816   | 0.40164   | 1 | 2 | BRCA | 21.1  | 0 | 33   | NA |
| TCGA-E2-A14N | 10.08105   | 3.49747   | -4.25622  | 1 | 2 | BRCA | 47.1  | 0 | 44   | 10 |
| TCGA-D8-A27T | 8.86091    | 3.48651   | 2.36890   | 1 | 2 | BRCA | 13.1  | 0 | 17   | 4  |
| TCGA-C8-A275 | 8.93902    | 3.48373   | #NUM!     | 1 | 2 | BRCA | 0.0   | 0 | 93   | 9  |
| TCGA-A8-A076 | 8.99620    | 3.46044   | 0.60139   | 1 | 2 | BRCA | 53.9  | 0 | 45   | 10 |
| TCGA-BH-A18I | 8.92145    | 3.42622   | -0.64282  | 1 | 2 | BRCA | 35.9  | 0 | 19   | 2  |
| TCGA-A7-A6VW | 9.39995    | 3.41514   | 1.84165   | 1 | 2 | BRCA | 9.4   | 0 | NA   | NA |
| TCGA-BH-A0B3 | 9.44371    | 3.41434   | 1.68261   | 1 | 2 | BRCA | 39.5  | 0 | 49   | 5  |
| TCGA-A2-A0SX | 8.96212    | 3.38309   | -0.41508  | 1 | 2 | BRCA | 50.4  | 0 | 20   | 5  |
| TCGA-OL-A6VO | 9.44517    | 3.36947   | -0.11452  | 1 | 2 | BRCA | 28.2  | 0 | NA   | NA |
| TCGA-4H-AAAK | 8.72101    | 3.36771   | 0.24419   | 1 | 2 | BRCA | 11.4  | 0 | NA   | NA |
| TCGA-A8-A094 | 9.05868    | 3.35612   | -2.86680  | 1 | 2 | BRCA | 0.0   | 0 | 137  | 39 |
| TCGA-L5-A8NJ | 12.8331119 | 6.9075696 | 0.5263051 | 1 | 2 | ESCA | 16.5  | 0 | 203  | NA |
| TCGA-L5-A4OI | 12.4199164 | 4.0849734 | 0.3529929 | 1 | 2 | ESCA | 20    | 0 | 1763 | NA |
| TCGA-DK-A6B5 | #####      | #####     | #NUM!     | 1 | 2 | BLCA | 51    | 0 | NA   | NA |
| TCGA-DK-AA6C | #####      | #####     | #####     | 1 | 2 | BLCA | 14    | 1 | NA   | NA |

|              |          |          |           |   |   |      |       |     |     |     |
|--------------|----------|----------|-----------|---|---|------|-------|-----|-----|-----|
| TCGA-DK-AA75 | #####    | #####    | #####     | 1 | 2 | BLCA | 11    | 1   | NA  | NA  |
| TCGA-XF-A9SZ | #####    | #####    | #####     | 1 | 2 | BLCA | 28    | 1   | NA  | NA  |
| TCGA-XF-A8HH | #####    | #####    | #####     | 1 | 2 | BLCA | 2     | 1   | NA  | NA  |
| TCGA-E7-A97P | #####    | #####    | #####     | 1 | 2 | BLCA | 14    | 1   | NA  | NA  |
| TCGA-UY-A9PH | #####    | #####    | #####     | 1 | 2 | BLCA | 51    | 0   | NA  | NA  |
| TCGA-DK-A3IN | #####    | #####    | #NUM!     | 1 | 2 | BLCA | 8     | 1   | 335 | 66  |
| TCGA-FD-A3SM | #####    | #####    | #NUM!     | 1 | 2 | BLCA | 18    | 1   | 184 | 53  |
| TCGA-K4-A5RJ | #####    | #####    | #####     | 1 | 2 | BLCA | 18    | 0   | NA  | NA  |
| TCGA-DK-A3X1 | #####    | #####    | #####     | 1 | 2 | BLCA | 66    | 0   | 734 | 220 |
| TCGA-4Z-AA87 | #####    | #####    | #NUM!     | 1 | 2 | BLCA | 48    | 0   | NA  | NA  |
| TCGA-ZF-AA54 | #####    | #####    | #####     | 1 | 2 | BLCA | 19    | 1   | NA  | NA  |
| TCGA-HQ-A5NC | #####    | #####    | #####     | 1 | 2 | BLCA | 9     | 1   | NA  | NA  |
| TCGA-GV-A3JZ | #####    | #####    | #NUM!     | 1 | 2 | BLCA | 20    | 0   | 431 | 107 |
| TCGA-2F-A9KW | #####    | #####    | #####     | 1 | 2 | BLCA | 8     | 1   | NA  | NA  |
| TCGA-CU-A3QL | #####    | #####    | #NUM!     | 1 | 2 | BLCA | 5     | 0   | 80  | 19  |
| TCGA-DK-A2I4 | #####    | #####    | #NUM!     | 1 | 2 | BLCA | 143   | 0   | 761 | 137 |
| TCGA-PQ-A6FI | #####    | #####    | #NUM!     | 1 | 2 | BLCA | 12    | 0   | NA  | NA  |
| TCGA-DK-AA76 | #####    | #####    | #####     | 1 | 2 | BLCA | 12    | 0   | NA  | NA  |
| TCGA-XF-A9T6 | #####    | #####    | #####     | 1 | 2 | BLCA | 2     | 0   | NA  | NA  |
| TCGA-UY-A9PE | #####    | #####    | #####     | 1 | 2 | BLCA | 6     | 0   | NA  | NA  |
| TCGA-4Z-AA7M | #####    | #####    | #####     | 1 | 2 | BLCA | 16    | 0   | NA  | NA  |
| TCGA-XF-AAMY | #####    | #####    | #####     | 1 | 2 | BLCA | 99    | 0   | NA  | NA  |
| TCGA-ZF-AA4X | #####    | #####    | #NUM!     | 1 | 2 | BLCA | 67    | 0   | NA  | NA  |
| TCGA-G2-A3VY | #####    | #####    | #NUM!     | 1 | 2 | BLCA | 18    | 0   | 634 | 153 |
| TCGA-4Z-AA80 | #####    | #####    | #####     | 1 | 2 | BLCA | 1     | 1   | NA  | NA  |
| TCGA-BT-A20O | #####    | #####    | #####     | 1 | 2 | BLCA | 12    | 1   | 174 | 38  |
| TCGA-XF-A9SY | #####    | #####    | #####     | 1 | 2 | BLCA | 21    | 0   | NA  | NA  |
| TCGA-FD-A43P | #####    | #####    | #NUM!     | 1 | 2 | BLCA | 27    | 0   | NA  | NA  |
| TCGA-ZF-A9RN | #####    | #####    | #####     | 1 | 2 | BLCA | 20    | 1   | NA  | NA  |
| TCGA-FD-A3SR | #####    | #####    | #NUM!     | 1 | 2 | BLCA | 20    | 1   | 125 | 28  |
| TCGA-C4-A0F0 | #####    | #####    | #####     | 1 | 2 | BLCA | 2     | 0   | 84  | 15  |
| TCGA-EJ-5498 | 7.757763 | 2.269988 | 0.100036  | 1 | 2 | PRAD | 56.50 | 0.0 | 36  | 10  |
| TCGA-HC-7081 | 7.614440 | 1.986375 | -0.013625 | 1 | 2 | PRAD | 37.32 | 0.0 | 31  | 6   |
| TCGA-4L-AA1F | 8.156451 | 2.699616 | -0.207245 | 1 | 2 | PRAD | 11.50 | 0.0 | NA  | NA  |
| TCGA-ZG-A9LS | 7.755623 | 3.018579 | -0.303294 | 1 | 2 | PRAD | 16.95 | 0.0 | NA  | NA  |
| TCGA-G9-6351 | 7.710698 | 1.335883 | -0.471549 | 1 | 2 | PRAD | 67.28 | 0.0 | 47  | 3   |
| TCGA-EJ-5511 | 7.780709 | 1.725519 | -1.081950 | 1 | 2 | PRAD | 48.49 | 0.0 | 35  | 4   |
| TCGA-EJ-7793 | 7.912356 | 1.979367 | -1.342671 | 1 | 2 | PRAD | 3.75  | 0.0 | 22  | 5   |
| TCGA-CH-5768 | 7.775317 | 1.238359 | -1.569180 | 1 | 2 | PRAD | 24.01 | 0.0 | 61  | 9   |
| TCGA-CH-5754 | 7.619617 | 1.707922 | -2.198990 | 1 | 2 | PRAD | 2.04  | 0.0 | 83  | 9   |
| TCGA-V1-A9O9 | 7.804314 | 1.845952 | #NUM!     | 1 | 2 | PRAD | 94.28 | 0.0 | NA  | NA  |
| TCGA-ZG-A9MC | 7.651705 | 1.586404 | #NUM!     | 1 | 2 | PRAD | 14.95 | 0.0 | NA  | NA  |
| TCGA-CH-5752 | 7.792940 | 1.174151 | #NUM!     | 1 | 2 | PRAD | 30.98 | 0.0 | 51  | 12  |
| TCGA-CH-5790 | 7.596800 | 1.121679 | #NUM!     | 1 | 2 | PRAD | 32.00 | 0.0 | 27  | 6   |
| TCGA-2J-AABF | 10.0145  | 3.9297   | 0.5035    | 1 | 2 | PAAD | 22.70 | 1.0 | 71  | NA  |
| TCGA-IB-7891 | 9.8133   | 3.5335   | #NUM!     | 1 | 2 | PAAD | 29.99 | 1.0 | 45  | NA  |
| TCGA-IB-7885 | 10.4879  | 3.1799   | 0.7470    | 1 | 2 | PAAD | 41.29 | 0.0 | 250 | NA  |
| TCGA-HZ-A77O | 10.4848  | 3.1468   | -0.8531   | 1 | 2 | PAAD | 5.26  | 1.0 | 47  | NA  |
| TCGA-M8-A5N4 | 9.9755   | 3.0074   | 0.7850    | 1 | 2 | PAAD | 19.19 | 0.0 | 40  | NA  |
| TCGA-HZ-8636 | 10.1886  | 2.8759   | 0.8055    | 1 | 2 | PAAD | 17.90 | 1.0 | 90  | NA  |
| TCGA-IB-7887 | 10.2655  | 2.8088   | #NUM!     | 1 | 2 | PAAD | 3.61  | 1.0 | 264 | NA  |
| TCGA-2J-AAB8 | 10.0653  | 2.7182   | #NUM!     | 1 | 2 | PAAD | 2.63  | 0.0 | 76  | NA  |
| TCGA-HV-A5A4 | 9.7801   | 2.6889   | 0.1039    | 1 | 2 | PAAD | 7.62  | 0.0 | 48  | NA  |
| TCGA-US-A776 | 9.8557   | 2.6712   | -0.0293   | 1 | 2 | PAAD | 39.95 | 0.0 | 149 | NA  |

|              |           |          |           |   |   |      |       |     |     |    |
|--------------|-----------|----------|-----------|---|---|------|-------|-----|-----|----|
| TCGA-HZ-7926 | 9.9532    | 2.6702   | 0.2779    | 1 | 2 | PAAD | 17.02 | 1.0 | 122 | NA |
| TCGA-Y8-A8RZ | 8.750147  | 5.739997 | #NUM!     | 1 | 2 | KIRP | 7     | 0.0 | NA  | NA |
| TCGA-IA-A83S | 8.177566  | 5.620756 | #NUM!     | 1 | 2 | KIRP | 86    | 1.0 | NA  | NA |
| TCGA-BQ-5881 | 8.642303  | 4.730221 | #NUM!     | 1 | 2 | KIRP | 48    | 0.0 | 31  | 12 |
| TCGA-BQ-7051 | 9.160180  | 4.639284 | #NUM!     | 1 | 2 | KIRP | 50    | 0.0 | 51  | 19 |
| TCGA-A4-7286 | 8.485674  | 4.321928 | #NUM!     | 1 | 2 | KIRP | 18    | 0.0 | 56  | 12 |
| TCGA-SX-A71U | 8.263514  | 4.229795 | #NUM!     | 1 | 2 | KIRP | 45    | 0.0 | NA  | NA |
| TCGA-2K-A9WE | 9.370756  | 4.208861 | #NUM!     | 1 | 2 | KIRP | 7     | 0.0 | NA  | NA |
| TCGA-GL-A9DD | 9.021682  | 4.130659 | #NUM!     | 1 | 2 | KIRP | 11    | 0.0 | NA  | NA |
| TCGA-DW-7963 | 8.865520  | 4.110631 | #NUM!     | 1 | 2 | KIRP | 41    | 0.0 | 20  | 7  |
| TCGA-5P-A9K9 | 8.907240  | 4.102195 | #NUM!     | 1 | 2 | KIRP | 19    | 1.0 | 36  | NA |
| TCGA-IA-A83V | 8.853484  | 4.039428 | #NUM!     | 1 | 2 | KIRP | 97    | 1.0 | NA  | NA |
| TCGA-DW-7838 | 9.356393  | 4.007124 | #NUM!     | 1 | 2 | KIRP | 24    | 0.0 | 61  | 18 |
| TCGA-HE-A5NF | 8.233904  | 3.948666 | #NUM!     | 1 | 2 | KIRP | 85    | 0.0 | 74  | 12 |
| TCGA-B9-7268 | 8.212658  | 3.931900 | #NUM!     | 1 | 2 | KIRP | 22    | 0.0 | 134 | 15 |
| TCGA-BQ-7062 | 8.978801  | 3.850569 | #NUM!     | 1 | 2 | KIRP | 4     | 0.0 | 29  | 7  |
| TCGA-A4-7996 | 8.292624  | 3.715355 | #NUM!     | 1 | 2 | KIRP | 17    | 0.0 | 57  | 18 |
| TCGA-DZ-6134 | 8.215387  | 3.709621 | #NUM!     | 1 | 2 | KIRP | 61    | 0.0 | 51  | 9  |
| TCGA-B1-A655 | 8.423899  | 3.646946 | #NUM!     | 1 | 2 | KIRP | 17    | 0.0 | 117 | 21 |
| TCGA-Y8-A898 | 8.418607  | 3.569429 | #NUM!     | 1 | 2 | KIRP | 16    | 0.0 | NA  | NA |
| TCGA-5P-A9JY | 8.354567  | 3.377693 | #NUM!     | 1 | 2 | KIRP | 50    | 1.0 | 76  | NA |
| TCGA-B3-4103 | 8.299157  | 3.299157 | #NUM!     | 1 | 2 | KIRP | 31    | 0.0 | 341 | 23 |
| TCGA-4A-A93Y | 8.668597  | 3.291412 | #NUM!     | 1 | 2 | KIRP | 12    | 0.0 | NA  | NA |
| TCGA-Y8-A895 | 8.290956  | 3.202026 | #NUM!     | 1 | 2 | KIRP | 16    | 0.0 | NA  | NA |
| TCGA-KV-A74V | 9.221155  | 3.201822 | #NUM!     | 1 | 2 | KIRP | 11    | 0.0 | 79  | NA |
| TCGA-DW-7841 | 9.792589  | 2.936779 | #NUM!     | 1 | 2 | KIRP | 15    | 0.0 | 25  | 14 |
| TCGA-UZ-A9PO | 8.391029  | 2.913014 | #NUM!     | 1 | 2 | KIRP | 63    | 0.0 | NA  | NA |
| TCGA-HE-7128 | 8.512081  | 2.856647 | #NUM!     | 1 | 2 | KIRP | ####  | 0.0 | 172 | 12 |
| TCGA-UZ-A9PM | 8.881507  | 2.748826 | #NUM!     | 1 | 2 | KIRP | 125   | 0.0 | NA  | NA |
| TCGA-UZ-A9PV | 8.581105  | 2.696283 | #NUM!     | 1 | 2 | KIRP | 47    | 0.0 | NA  | NA |
| TCGA-A4-8515 | 8.406202  | 2.695415 | #NUM!     | 1 | 2 | KIRP | 23    | 0.0 | NA  | 25 |
| TCGA-BQ-7059 | 9.222990  | 2.557606 | -1.835008 | 1 | 2 | KIRP | 8     | 0.0 | 29  | 23 |
| TCGA-G7-6796 | 9.412064  | 2.545400 | #NUM!     | 1 | 2 | KIRP | 71    | 0.0 | 50  | 16 |
| TCGA-UZ-A9PL | 8.716665  | 2.504010 | #NUM!     | 1 | 2 | KIRP | 104   | 0.0 | NA  | NA |
| TCGA-A4-A5Y0 | 8.197427  | 2.478480 | #NUM!     | 1 | 2 | KIRP | 8     | 0.0 | 197 | 21 |
| TCGA-HE-A5NH | 9.075865  | 2.474021 | #NUM!     | 1 | 2 | KIRP | 26    | 0.0 | 87  | 23 |
| TCGA-IA-A83T | 8.397746  | 2.307020 | #NUM!     | 1 | 2 | KIRP | 88    | 1.0 | NA  | NA |
| TCGA-2Z-A9JS | 8.281068  | 2.184661 | #NUM!     | 1 | 2 | KIRP | 16    | 1.0 | NA  | NA |
| TCGA-2Z-A9J6 | 8.378657  | 2.169219 | #NUM!     | 1 | 2 | KIRP | 57    | 0.0 | NA  | NA |
| TCGA-BQ-7046 | 8.931869  | 2.093357 | #NUM!     | 1 | 2 | KIRP | 97    | 0.0 | 24  | 11 |
| TCGA-A4-8311 | 9.077801  | 2.090278 | #NUM!     | 1 | 2 | KIRP | 24    | 0.0 | 13  | 13 |
| TCGA-HE-A5NL | 8.333926  | 2.070973 | #NUM!     | 1 | 2 | KIRP | 25    | 0.0 | 43  | 20 |
| TCGA-UZ-A9PK | 8.444797  | 1.988630 | #NUM!     | 1 | 2 | KIRP | 117   | 0.0 | NA  | NA |
| TCGA-A4-A57E | 8.429544  | 1.959214 | #NUM!     | 1 | 2 | KIRP | 8     | 1.0 | 95  | 19 |
| TCGA-5P-A9K3 | 8.854456  | 1.774333 | #NUM!     | 1 | 2 | KIRP | 15    | 1.0 | NA  | NA |
| TCGA-DW-7834 | 9.223313  | 1.582845 | #NUM!     | 1 | 2 | KIRP | 130   | 0.0 | NA  | 14 |
| TCGA-B9-A5W7 | 8.597868  | 1.504315 | #NUM!     | 1 | 2 | KIRP | 19    | 0.0 | 91  | 3  |
| TCGA-UZ-A9PZ | 8.216874  | 1.399718 | #NUM!     | 1 | 2 | KIRP | 22    | 0.0 | NA  | NA |
| TCGA-A4-7997 | 9.235037  | 1.371615 | #NUM!     | 1 | 2 | KIRP | 30    | 0.0 | 81  | 20 |
| TCGA-G7-A8LD | 10.505360 | 1.365972 | #NUM!     | 1 | 2 | KIRP | 17    | 1.0 | NA  | NA |
| TCGA-2Z-A9JR | 8.319152  | 0.920674 | #NUM!     | 1 | 2 | KIRP | 5     | 0.0 | NA  | NA |
| TCGA-UZ-A9Q0 | 8.829355  | 0.892974 | #NUM!     | 1 | 2 | KIRP | 111   | 0.0 | NA  | NA |
| TCGA-Y8-A896 | 9.082164  | 0.869713 | #NUM!     | 1 | 2 | KIRP | 19    | 0.0 | NA  | NA |
| TCGA-BQ-7053 | 9.244008  | 0.859493 | #NUM!     | 1 | 2 | KIRP | 50    | 0.0 | 9   | 14 |

|              |          |          |           |   |   |       |     |     |      |      |
|--------------|----------|----------|-----------|---|---|-------|-----|-----|------|------|
| TCGA-B9-A8YH | 9.115769 | 0.669934 | -1.652040 | 1 | 2 | KIRP  | 17  | 0.0 | NA   | NA   |
| TCGA-G7-A4TM | 9.035646 | 0.633198 | #NUM!     | 1 | 2 | KIRP  | 25  | 0.0 | NA   | 9    |
| TCGA-UZ-A9PX | 8.302719 | 0.622086 | #NUM!     | 1 | 2 | KIRP  | 65  | 0.0 | NA   | NA   |
| TCGA-5P-A9KC | 8.980138 | 0.504060 | #NUM!     | 1 | 2 | KIRP  | 12  | 0.0 | NA   | NA   |
| TCGA-B1-7332 | 8.202143 | 0.467384 | #NUM!     | 1 | 2 | KIRP  | 37  | 0.0 | 38   | NA   |
| TCGA-BQ-7061 | 8.937735 | 0.431035 | #NUM!     | 1 | 2 | KIRP  | 7   | 0.0 | 34   | 21   |
| TCGA-Y8-A8S0 | 8.483548 | 0.231677 | #NUM!     | 1 | 2 | KIRP  | 6   | 0.0 | NA   | NA   |
| TCGA-G7-6792 | 9.626929 | 0.156267 | #NUM!     | 1 | 2 | KIRP  | 91  | 0.0 | 55   | 10   |
| TCGA-DM-A1D7 | #####    | #####    | #####     | 1 | 2 | Colon | 13  | 1.0 | 44   | NA   |
| TCGA-A6-6138 | #####    | #####    | #####     | 1 | 2 | Colon | 23  | 0.0 | 43   | NA   |
| TCGA-G4-6311 | #####    | #####    | #####     | 1 | 2 | Colon | 39  | 0.0 | 114  | NA   |
| TCGA-G4-6586 | #####    | #####    | #####     | 1 | 2 | Colon | 36  | 0.0 | 501  | NA   |
| TCGA-AA-3976 | #####    | #####    | #####     | 1 | 2 | Colon | 26  | 0.0 | #N/A | #N/A |
| TCGA-AA-3862 | #####    | #####    | #####     | 1 | 2 | Colon | 30  | 0.0 | #N/A | #N/A |
| TCGA-QL-A97D | #####    | #####    | #####     | 1 | 2 | Colon | 22  | 0.0 | NA   | NA   |
| TCGA-D5-6932 | #####    | #####    | #NUM!     | 1 | 2 | Colon | 11  | 0.0 | 48   | NA   |
| TCGA-AA-3861 | #####    | #####    | #####     | 1 | 2 | Colon | 30  | 0.0 | #N/A | #N/A |
| TCGA-AZ-4615 | #####    | #####    | #####     | 1 | 2 | Colon | 33  | 0.0 | 607  | NA   |
| TCGA-A6-5659 | #####    | #####    | #####     | 1 | 2 | Colon | 30  | 0.0 | 64   | NA   |
| TCGA-DM-A1D8 | #####    | #####    | #####     | 1 | 2 | Colon | 140 | 0.0 | 52   | NA   |
| TCGA-AA-A02E | #####    | #####    | #####     | 1 | 2 | Colon | 3   | 1.0 | #N/A | #N/A |
| TCGA-D5-6898 | #####    | #####    | #####     | 1 | 2 | Colon | 8   | 0.0 | 25   | NA   |
| TCGA-CM-5344 | #####    | #####    | #NUM!     | 1 | 2 | Colon | 22  | 0.0 | 26   | NA   |
| TCGA-CM-6170 | #####    | #####    | #####     | 1 | 2 | Colon | 15  | 0.0 | 25   | NA   |
| TCGA-DM-A28A | #####    | #####    | #####     | 1 | 2 | Colon | 26  | 1.0 | NA   | NA   |
| TCGA-D5-6531 | #####    | #####    | #NUM!     | 1 | 2 | Colon | 18  | 0.0 | 81   | NA   |
| TCGA-NH-A50T | #####    | #####    | #NUM!     | 1 | 2 | Colon | 18  | 0.0 | NA   | NA   |
| TCGA-AA-A00U | #####    | #####    | #####     | 1 | 2 | Colon | 17  | 0.0 | #N/A | #N/A |
| TCGA-AA-3655 | #####    | #####    | #NUM!     | 1 | 2 | Colon | 61  | 0.0 | 31   | NA   |
| TCGA-AA-A01V | #####    | #####    | #####     | 1 | 2 | Colon | 1   | 0.0 | #N/A | #N/A |
| TCGA-QG-A5Z2 | #####    | #####    | #####     | 1 | 2 | Colon | 31  | 0.0 | NA   | NA   |
| TCGA-AA-3492 | #####    | #####    | #####     | 1 | 2 | Colon | 3   | 1.0 | 851  | NA   |
| TCGA-AA-A022 | #####    | #####    | #####     | 1 | 2 | Colon | 0   | 0.0 | #N/A | #N/A |
| TCGA-AU-6004 | #####    | #####    | #NUM!     | 1 | 2 | Colon | 27  | 0.0 | 537  | NA   |
| TCGA-CM-4744 | #####    | #####    | #NUM!     | 1 | 2 | Colon | 20  | 0.0 | 59   | NA   |
| TCGA-G4-6315 | #####    | #####    | #####     | 1 | 2 | Colon | 62  | 0.0 | 59   | NA   |
| TCGA-AA-A01S | #####    | #####    | #####     | 1 | 2 | Colon | 1   | 0.0 | #N/A | #N/A |
| TCGA-AA-3977 | #####    | #####    | #####     | 1 | 2 | Colon | 25  | 0.0 | #N/A | #N/A |
| TCGA-AY-A8YK | #####    | #####    | #NUM!     | 1 | 2 | Colon | 19  | 0.0 | NA   | NA   |
| TCGA-A6-2677 | #####    | #####    | #NUM!     | 1 | 2 | Colon | 24  | 1.0 | #N/A | #N/A |
| TCGA-AA-A02J | #####    | #####    | #####     | 1 | 2 | Colon | 5   | 1.0 | #N/A | #N/A |
| TCGA-F4-6808 | #####    | #####    | #NUM!     | 1 | 2 | Colon | 34  | 0.0 | 41   | NA   |
| TCGA-AA-3846 | #####    | #####    | #####     | 1 | 2 | Colon | 17  | 0.0 | #N/A | #N/A |
| TCGA-A6-6137 | #####    | #####    | #NUM!     | 1 | 2 | Colon | 27  | 0.0 | 43   | NA   |
| TCGA-F4-6570 | #####    | #####    | #NUM!     | 1 | 2 | Colon | 6   | 1.0 | 606  | NA   |
| TCGA-CK-5914 | #####    | #####    | #NUM!     | 1 | 2 | Colon | 22  | 0.0 | 48   | NA   |
| TCGA-DM-A1D4 | #####    | #####    | #NUM!     | 1 | 2 | Colon | 93  | 1.0 | 76   | NA   |
| TCGA-AA-3524 | #####    | #####    | #####     | 1 | 2 | Colon | 36  | 0.0 | #N/A | #N/A |
| TCGA-G4-6320 | #####    | #####    | #NUM!     | 1 | 2 | Colon | 26  | 0.0 | 371  | NA   |
| TCGA-AZ-6599 | #####    | #NUM!    | #####     | 1 | 2 | Colon | 7   | 1.0 | 90   | NA   |
| TCGA-AY-6197 | #####    | #####    | #NUM!     | 1 | 2 | Colon | 21  | 0.0 | 586  | NA   |
| TCGA-D5-5541 | #####    | #####    | #NUM!     | 1 | 2 | Colon | 56  | 0.0 | 35   | NA   |
| TCGA-DM-A28F | #####    | #####    | #NUM!     | 1 | 2 | Colon | 36  | 1.0 | 94   | NA   |
| TCGA-AZ-6606 | #####    | #####    | #NUM!     | 1 | 2 | Colon | 12  | 1.0 | NA   | NA   |

|              |            |           |            |   |   |       |        |     |      |      |
|--------------|------------|-----------|------------|---|---|-------|--------|-----|------|------|
| TCGA-AA-3530 | #####      | #####     | #####      | 1 | 2 | Colon | 19     | 0.0 | #N/A | #N/A |
| TCGA-D5-6537 | #####      | #####     | #####      | 1 | 2 | Colon | 5      | 1.0 | 108  | NA   |
| TCGA-AZ-6601 | #####      | #####     | #####      | 1 | 2 | Colon | 100    | 1.0 | 657  | NA   |
| TCGA-CK-4947 | #####      | #####     | #####      | 1 | 2 | Colon | 18     | 0.0 | 29   | NA   |
| TCGA-CM-5860 | #####      | #####     | #NUM!      | 1 | 2 | Colon | 32     | 0.0 | 41   | NA   |
| TCGA-AD-6889 | #####      | #NUM!     | #NUM!      | 1 | 2 | Colon | 83     | 1.0 | 773  | NA   |
| TCGA-CM-6171 | #####      | #####     | #NUM!      | 1 | 2 | Colon | 14     | 0.0 | 451  | NA   |
| TCGA-A6-5667 | #####      | #####     | #NUM!      | 1 | 2 | Colon | 29     | 0.0 | 62   | NA   |
| TCGA-AY-5543 | #####      | #####     | #####      | 1 | 2 | Colon | 33     | 0.0 | 39   | NA   |
| TCGA-AY-A69D | #####      | #####     | #####      | 1 | 2 | Colon | 18     | 0.0 | NA   | NA   |
| TCGA-G4-6626 | #####      | #####     | #NUM!      | 1 | 2 | Colon | 47     | 1.0 | 54   | NA   |
| TCGA-CK-5915 | #####      | #####     | #NUM!      | 1 | 2 | Colon | 0      | 0.0 | 43   | NA   |
| TCGA-A6-5666 | #####      | #####     | #####      | 1 | 2 | Colon | 33     | 0.0 | 46   | NA   |
| TCGA-T9-A92H | #####      | #####     | #####      | 1 | 2 | Colon | 12     | 0.0 | NA   | NA   |
| TCGA-AA-A00J | #####      | #####     | #####      | 1 | 2 | Colon | 18     | 0.0 | #N/A | #N/A |
| TCGA-AA-A01G | #####      | #####     | #####      | 1 | 2 | Colon | 12     | 0.0 | #N/A | #N/A |
| TCGA-D5-6540 | #####      | #####     | #####      | 1 | 2 | Colon | 16     | 0.0 | 521  | NA   |
| TCGA-DM-A285 | #####      | #####     | #####      | 1 | 2 | Colon | 6      | 1.0 | 46   | NA   |
| TCGA-NH-A50U | #####      | #####     | #NUM!      | 1 | 2 | Colon | 11     | 1.0 | NA   | NA   |
| TCGA-A6-3809 | #####      | #####     | #####      | 1 | 2 | Colon | 33     | 0.0 | #N/A | #N/A |
| TCGA-CA-5796 | #####      | #####     | #####      | 1 | 2 | Colon | 12     | 0.0 | 21   | NA   |
| TCGA-CN-4737 | 7.47585095 | 3.4402612 | #NUM!      | 1 | 2 | HNSC  | 20.53  | 0.0 | 44   | 7    |
| TCGA-BA-6873 | 8.3307856  | 2.158434  | #NUM!      | 1 | 2 | HNSC  | 4.01   | 0.0 | 61   | 14   |
| TCGA-CR-5249 | 7.5241687  | 0.5734715 | -1.4266255 | 1 | 2 | HNSC  | 00000  | 0.0 | 36   | 4    |
| TCGA-CR-6470 | 7.67825012 | 2.0227584 | -1.4367442 | 1 | 2 | HNSC  | 49.97  | 0.0 | 39   | 8    |
| TCGA-CV-7090 | 7.31876061 | 1.2070807 | -1.1149724 | 1 | 2 | HNSC  | 172.54 | 0.0 | 42   | 9    |
| TCGA-BB-7866 | 7.73077512 | 0.9111163 | #NUM!      | 1 | 2 | HNSC  | 44.94  | 0.0 | NA   | NA   |
| TCGA-P3-A5QA | 9.55148545 | 1.1548424 | #NUM!      | 1 | 2 | HNSC  | 00000  | 0.0 | NA   | NA   |
| TCGA-CR-7385 | 7.46647051 | 1.7722657 | #NUM!      | 1 | 2 | HNSC  | 32.75  | 0.0 | 44   | 11   |
| TCGA-CR-7397 | 7.48199393 | 2.8832298 | #NUM!      | 1 | 2 | HNSC  | 24.77  | 0.0 | 38   | 4    |
| TCGA-C9-A480 | 7.20008743 | 2.3177961 | #NUM!      | 1 | 2 | HNSC  | 12.68  | 0.0 | NA   | NA   |
| TCGA-CR-7372 | 7.11943711 | 3.5434093 | -1.2115649 | 1 | 2 | HNSC  | 24.93  | 0.0 | 46   | 13   |
| TCGA-CQ-5329 | 8.4035238  | 1.6990185 | #NUM!      | 1 | 2 | HNSC  | 00000  | 0.0 | 30   | 9    |
| TCGA-CN-A641 | 7.28581277 | 0.7178245 | #NUM!      | 1 | 2 | HNSC  | 12.06  | 0.0 | NA   | NA   |
| TCGA-F7-A620 | 7.76636591 | 0.9729867 | -1.0270868 | 1 | 2 | HNSC  | 17.84  | 0.0 | NA   | NA   |
| TCGA-P3-A6T0 | 7.27165257 | 4.2446816 | -1.483178  | 1 | 2 | HNSC  | 99999  | 0.0 | NA   | NA   |
| TCGA-BA-5149 | 7.32956047 | 2.260387  | #NUM!      | 1 | 2 | HNSC  | 26.48  | 1.0 | 119  | 25   |
| TCGA-CN-A63W | 8.14745324 | 0.7196654 | #NUM!      | 1 | 2 | HNSC  | 12.39  | 1.0 | NA   | NA   |
| TCGA-CN-4742 | 7.76750848 | 1.9632152 | -1.4961425 | 1 | 2 | HNSC  | 13.04  | 1.0 | 76   | 8    |
| TCGA-F7-8489 | 7.5815727  | 2.2421147 | #NUM!      | 1 | 2 | HNSC  | 21.62  | 0.0 | NA   | NA   |
| TCGA-CV-7568 | 7.48440563 | 0.8952251 | #NUM!      | 1 | 2 | HNSC  | 30.45  | 1.0 | NA   | NA   |
| TCGA-P3-A5Q6 | 7.96720781 | 0.9813412 | -1.0185857 | 1 | 2 | HNSC  | 15.77  | 1.0 | NA   | NA   |
| TCGA-IQ-7630 | 7.06303908 | 0.9981955 | #NUM!      | 1 | 2 | HNSC  | 15.93  | 0.0 | 110  | 21   |
| TCGA-CV-6960 | 7.38195386 | 1.0660547 | -1.5191145 | 1 | 2 | HNSC  | 28.32  | 1.0 | 153  | 18   |
| TCGA-P3-A5QE | 8.16785365 | 0.5821706 | #NUM!      | 1 | 2 | HNSC  | 51.22  | 0.0 | NA   | NA   |
| TCGA-CV-7103 | 7.33757285 | 2.0429595 | -1.5420381 | 1 | 2 | HNSC  | 52.27  | 1.0 | 41   | 6    |
| TCGA-D6-6823 | 9.07656203 | 0.4594316 | -1.8624965 | 1 | 2 | HNSC  | 23.03  | 0.0 | 96   | 12   |
| TCGA-CV-7243 | 7.38658594 | 0.2642362 | -1.3208465 | 1 | 2 | HNSC  | 31.34  | 0.0 | 65   | 15   |
| TCGA-CN-A63U | 9.06890991 | 0.8084262 | #NUM!      | 1 | 2 | HNSC  | 31.67  | 0.0 | NA   | NA   |
| TCGA-CV-5976 | 7.25527978 | 1.6275601 | -1.5424582 | 1 | 2 | HNSC  | 48.55  | 0.0 | 68   | 12   |
| TCGA-CV-6003 | 8.813483   | 2.2592725 | #NUM!      | 1 | 2 | HNSC  | 54.7   | 0.0 | 90   | 15   |
| TCGA-CV-6941 | 8.05406974 | 2.9186534 | -1.3291597 | 1 | 2 | HNSC  | 11.24  | 1.0 | 124  | 25   |
| TCGA-DQ-7590 | 7.86852133 | 2.3102529 | -1.2747387 | 1 | 2 | HNSC  | 46.42  | 0.0 | NA   | NA   |
| TCGA-BA-5153 | 8.70909484 | 0.4978423 | #NUM!      | 1 | 2 | HNSC  | 57.88  | 1.0 | 51   | 11   |



|              |            |           |            |   |   |      |        |     |      |      |
|--------------|------------|-----------|------------|---|---|------|--------|-----|------|------|
| TCGA-CQ-7072 | 9.12149751 | 1.2108875 | -1.1109159 | 1 | 2 | HNSC | 77.5   | 0.0 | NA   | NA   |
| TCGA-DQ-5631 | 8.41032796 | 3.8800292 | #NUM!      | 1 | 2 | HNSC | 18     | 1.0 | 76   | 15   |
| TCGA-HD-7832 | 7.0958622  | 0.488515  | #NUM!      | 1 | 2 | HNSC | 27.46  | 0.0 | 83   | 12   |
| TCGA-CQ-6224 | 7.57182013 | 3.1824857 | #NUM!      | 1 | 2 | HNSC | 56.54  | 0.0 | 59   | 8    |
| TCGA-CN-4735 | 8.14006541 | 0.9279723 | #NUM!      | 1 | 2 | HNSC | 57.06  | 0.0 | 127  | 25   |
| TCGA-CN-4738 | 7.83738573 | 3.393677  | #NUM!      | 1 | 2 | HNSC | 14.32  | 1.0 | 95   | 18   |
| TCGA-BA-6868 | 7.73176297 | 4.1454981 | -1.7369656 | 1 | 2 | HNSC | 15.51  | 1.0 | 135  | 24   |
| TCGA-CR-7398 | 8.96503504 | 1.6757708 | #NUM!      | 1 | 2 | HNSC | 5.12   | 0.0 | 293  | 33   |
| TCGA-CN-6010 | 7.96471456 | 3.8139761 | -1.3955491 | 1 | 2 | HNSC | 50.03  | 0.0 | 146  | 22   |
| TCGA-CR-5248 | 7.24688878 | 1.9665043 | #NUM!      | 1 | 2 | HNSC | 54.63  | 0.0 | 300  | 83   |
| TCGA-CV-5978 | 8.26167936 | 2.9571346 | #NUM!      | 1 | 2 | HNSC | 7.06   | 1.0 | 148  | 20   |
| TCGA-CV-7091 | 8.08497045 | 0.6104166 | -1.3894889 | 1 | 2 | HNSC | 111.07 | 0.0 | 113  | 16   |
| TCGA-P3-A5Q5 | 7.1095413  | 3.2026528 | #NUM!      | 1 | 2 | HNSC | 29.89  | 0.0 | NA   | NA   |
| TCGA-IQ-A6SH | 7.55894871 | 1.7387678 | #NUM!      | 1 | 2 | HNSC | 15.47  | 0.0 | NA   | NA   |
| TCGA-CV-7429 | 7.96627587 | 0.4466797 | #NUM!      | 1 | 2 | HNSC | 3.52   | 1.0 | 46   | 12   |
| TCGA-IQ-A61E | 7.76659582 | 0.9542708 | -1.0457292 | 1 | 2 | HNSC | 37.68  | 0.0 | NA   | NA   |
| TCGA-CV-7254 | 7.9222942  | 3.4748384 | #NUM!      | 1 | 2 | HNSC | 47.93  | 1.0 | 214  | 38   |
| TCGA-CN-5373 | 7.39172477 | 2.5228342 | #NUM!      | 1 | 2 | HNSC | 52.04  | 0.0 | 130  | 23   |
| TCGA-QK-A8Z9 | 8.7060083  | 1.0007212 | -0.9991346 | 1 | 2 | HNSC | 14.75  | 1.0 | NA   | NA   |
| TCGA-CR-6477 | 7.23416693 | 3.075738  | #NUM!      | 1 | 2 | HNSC | 16.89  | 0.0 | 78   | 19   |
| TCGA-HD-A634 | 9.26400949 | 6.4627902 | #NUM!      | 1 | 2 | HNSC | 99999  | 1.0 | NA   | NA   |
| TCGA-CN-4728 | 7.58049451 | 3.043607  | -1.1262655 | 1 | 2 | HNSC | 56.64  | 0.0 | 120  | 28   |
| TCGA-CV-7435 | 8.01385526 | 3.1367492 | #NUM!      | 1 | 2 | HNSC | 153.75 | 1.0 | 76   | 7    |
| TCGA-BA-A4IH | 7.49096637 | 5.54974   | -1.4274013 | 1 | 2 | HNSC | 20.43  | 0.0 | NA   | NA   |
| TCGA-CV-6433 | 7.89166646 | 0.2993619 | #NUM!      | 1 | 2 | HNSC | 21.06  | 0.0 | 52   | 10   |
| TCGA-CN-A6UY | 8.15999946 | 1.4627329 | #NUM!      | 1 | 2 | HNSC | 23.42  | 0.0 | NA   | NA   |
| TCGA-DQ-7592 | 7.26830058 | 2.4368814 | -1.148161  | 1 | 2 | HNSC | 99999  | 0.0 | 63   | 19   |
| TCGA-CV-7261 | 7.81983804 | 2.5750702 | #NUM!      | 1 | 2 | HNSC | 49.67  | 0.0 | 102  | 17   |
| TCGA-CV-5435 | 7.7229605  | 0.8776657 | #NUM!      | 1 | 2 | HNSC | 00000  | 1.0 | 97   | 18   |
| TCGA-UP-A6WW | 7.3498164  | 1.0644    | #NUM!      | 1 | 2 | HNSC | 17.02  | 0.0 | NA   | NA   |
| TCGA-CR-7380 | 7.16668633 | 1.5779242 | #NUM!      | 1 | 2 | HNSC | 19.91  | 1.0 | 90   | 19   |
| TCGA-CV-A6K0 | 8.28167646 | 3.7616682 | -0.9930916 | 1 | 2 | HNSC | 19.91  | 0.0 | NA   | NA   |
| TCGA-WA-A7GZ | 8.46572066 | 1.1108977 | #NUM!      | 1 | 2 | HNSC | 20.53  | 1.0 | NA   | NA   |
| TCGA-F7-8298 | 7.41395197 | 0.3751785 | #NUM!      | 1 | 2 | HNSC | 32.69  | 0.0 | NA   | NA   |
| TCGA-BB-7870 | 7.19810219 | 0.8942939 | #NUM!      | 1 | 2 | HNSC | 66.23  | 0.0 | NA   | 6    |
| TCGA-QK-A8Z7 | 7.98925881 | 4.3086812 | #NUM!      | 1 | 2 | HNSC | 12.88  | 0.0 | NA   | NA   |
| TCGA-CN-A63V | 7.27943508 | 1.9730602 | #NUM!      | 1 | 2 | HNSC | 22.31  | 0.0 | #N/A | #N/A |
| TCGA-BA-A4IF | 7.36599517 | 0.9037324 | #NUM!      | 1 | 2 | HNSC | 29.4   | 0.0 | NA   | NA   |
| TCGA-CV-A45U | 7.14424424 | 3.5190134 | -1.1814766 | 1 | 2 | HNSC | 00000  | 1.0 | NA   | NA   |
| TCGA-D6-6517 | 7.27859163 | 2.3182011 | #NUM!      | 1 | 2 | HNSC | 9.59   | 0.0 | 64   | 13   |
| TCGA-CV-5434 | 7.9838766  | 3.3793853 | -1.3755715 | 1 | 2 | HNSC | 108.87 | 1.0 | 135  | 23   |
| TCGA-QK-A8ZA | 7.46852956 | 0.5656947 | #NUM!      | 1 | 2 | HNSC | 12.19  | 1.0 | NA   | NA   |
| TCGA-BA-6870 | 7.33549219 | 1.4256204 | -1.3815734 | 1 | 2 | HNSC | 14.82  | 1.0 | 81   | 16   |
| TCGA-CV-6939 | 7.8265612  | 2.399718  | #NUM!      | 1 | 2 | HNSC | 21.88  | 1.0 | 37   | 9    |
| TCGA-CV-7415 | 7.22108245 | 1.625364  | #NUM!      | 1 | 2 | HNSC | 22.83  | 1.0 | 67   | 18   |
| TCGA-CV-7242 | 7.91559858 | 0.9894297 | #NUM!      | 1 | 2 | HNSC | 35.97  | 0.0 | 262  | 35   |
| TCGA-CN-4725 | 8.48298377 | 1.5418617 | #NUM!      | 1 | 2 | HNSC | 38.01  | 0.0 | 52   | 13   |
| TCGA-QK-A8Z8 | 7.47150858 | 1.0326651 | #NUM!      | 1 | 2 | HNSC | 5.62   | 1.0 | NA   | NA   |
| TCGA-CV-7104 | 7.81929328 | 3.3632832 | #NUM!      | 1 | 2 | HNSC | 12.91  | 1.0 | 97   | 16   |
| TCGA-CV-7410 | 7.86378734 | 3.134681  | #NUM!      | 1 | 2 | HNSC | 210.81 | 1.0 | 38   | NA   |
| TCGA-QK-A6IF | 8.85945527 | 3.2851359 | #NUM!      | 1 | 2 | HNSC | 23.13  | 0.0 | NA   | NA   |
| TCGA-CN-A6V3 | 7.76384575 | 4.9567165 | #NUM!      | 1 | 2 | HNSC | 24.38  | 0.0 | NA   | NA   |
| TCGA-CN-A498 | 7.49429159 | 0.5131875 | #NUM!      | 1 | 2 | HNSC | 25.39  | 1.0 | NA   | NA   |
| TCGA-CQ-5327 | 7.5236827  | 2.4023402 | -1.0570914 | 1 | 2 | HNSC | 54.53  | 0.0 | NA   | 38   |

|              |            |           |            |   |   |      |        |     |     |     |
|--------------|------------|-----------|------------|---|---|------|--------|-----|-----|-----|
| TCGA-BA-A6DI | 7.75645625 | 2.7258284 | #NUM!      | 1 | 2 | HNSC | 11.04  | 1.0 | NA  | NA  |
| TCGA-F7-A61S | 7.64788218 | 0.9801716 | #NUM!      | 1 | 2 | HNSC | 00000  | 0.0 | NA  | NA  |
| TCGA-QK-A6VC | 7.28210152 | 1.2731578 | #NUM!      | 1 | 2 | HNSC | 19.71  | 0.0 | NA  | NA  |
| TCGA-UF-A7JV | 7.80145358 | 3.2060336 | -1.3789445 | 1 | 2 | HNSC | 2.96   | 1.0 | NA  | NA  |
| TCGA-CV-7418 | 7.32772688 | 3.5279961 | -1.3298848 | 1 | 2 | HNSC | 25.92  | 1.0 | 139 | 38  |
| TCGA-CV-7245 | 7.97373295 | 2.6585771 | #NUM!      | 1 | 2 | HNSC | 26.18  | 0.0 | 408 | 49  |
| TCGA-HD-7753 | 8.11662156 | 0.7626465 | -1.5593667 | 1 | 2 | HNSC | 28.45  | 0.0 | 88  | 12  |
| TCGA-CV-7252 | 7.82135052 | 1.2981891 | -1.2866561 | 1 | 2 | HNSC | 4.96   | 1.0 | 188 | 45  |
| TCGA-UF-A718 | 7.37607502 | 0.7916057 | #NUM!      | 1 | 2 | HNSC | 64.75  | 0.0 | NA  | NA  |
| TCGA-CV-5973 | 7.89921673 | 1.72927   | #NUM!      | 1 | 2 | HNSC | 86.76  | 0.0 | 49  | 13  |
| TCGA-CV-5966 | 8.93507073 | 2.2739037 | #NUM!      | 1 | 2 | HNSC | 99999  | 1.0 | 94  | 13  |
| TCGA-CN-4731 | 7.83487552 | 2.211573  | -1.1102928 | 1 | 2 | HNSC | 32.79  | 1.0 | 94  | 21  |
| TCGA-CN-A497 | 8.52129067 | 1.3018803 | -1.0200478 | 1 | 2 | HNSC | 34.99  | 0.0 | NA  | NA  |
| TCGA-IQ-A61I | 7.88288633 | 0.3909978 | #NUM!      | 1 | 2 | HNSC | 00000  | 1.0 | NA  | NA  |
| TCGA-D6-6826 | 7.97020255 | 1.3124909 | #NUM!      | 1 | 2 | HNSC | 11.43  | 1.0 | 87  | 17  |
| TCGA-CV-6950 | 8.56713508 | 1.9577661 | -1.8494403 | 1 | 2 | HNSC | 15.08  | 1.0 | 52  | 17  |
| TCGA-CV-7434 | 7.18102202 | 1.430981  | #NUM!      | 1 | 2 | HNSC | 7.16   | 1.0 | 81  | 19  |
| TCGA-CV-5444 | 7.67511022 | 2.8073549 | #NUM!      | 1 | 2 | HNSC | 80.06  | 0.0 | 105 | 33  |
| TCGA-CV-7250 | 7.25129493 | 3.4353752 | #NUM!      | 1 | 2 | HNSC | 95.27  | 1.0 | 177 | 21  |
| TCGA-CV-7423 | 8.32536842 | 3.348629  | #NUM!      | 1 | 2 | HNSC | 100.4€ | 1.0 | 69  | 9   |
| TCGA-CV-6952 | 7.35167073 | 0.3554674 | #NUM!      | 1 | 2 | HNSC | 6.08   | 1.0 | 146 | 18  |
| TCGA-CV-A461 | 7.1715181  | 1.898518  | #NUM!      | 1 | 2 | HNSC | 67.81  | 1.0 | NA  | NA  |
| TCGA-CR-7373 | 7.82529082 | 2.0367846 | #NUM!      | 1 | 2 | HNSC | 29.2   | 0.0 | 92  | 16  |
| TCGA-4P-AA8J | 8.35140793 | 3.3015584 | #NUM!      | 1 | 2 | HNSC | 3.35   | 0.0 | NA  | NA  |
| TCGA-CV-7446 | 8.24895649 | 2.6212431 | #NUM!      | 1 | 2 | HNSC | 99999  | 1.0 | NA  | NA  |
| TCGA-CN-6012 | 7.4466855  | 1.9167823 | #NUM!      | 1 | 2 | HNSC | 47.96  | 0.0 | 112 | 20  |
| TCGA-CR-6478 | 7.98273638 | 3.0426268 | -1.7121731 | 1 | 2 | HNSC | 6.01   | 1.0 | 98  | 19  |
| TCGA-CR-7374 | 8.29476501 | 2.3786503 | -1.3219281 | 1 | 2 | HNSC | 0.99   | 0.0 | 321 | 52  |
| TCGA-UF-A71A | 7.19187351 | 1.6419621 | -1.1655315 | 1 | 2 | HNSC | 2.83   | 1.0 | NA  | NA  |
| TCGA-D6-A74Q | 8.16796953 | 2.2648967 | -1.3201259 | 1 | 2 | HNSC | 23.32  | 0.0 | NA  | NA  |
| TCGA-F7-A50J | 7.99759501 | 0.4171639 | #NUM!      | 1 | 2 | HNSC | 31.11  | 0.0 | NA  | NA  |
| TCGA-CR-7392 | 8.1590953  | 0.5595408 | -1.0253239 | 1 | 2 | HNSC | 46.81  | 0.0 | 32  | 4   |
| TCGA-CN-4723 | 7.91012282 | 2.2058929 | #NUM!      | 1 | 2 | HNSC | 55.81  | 0.0 | 750 | 60  |
| TCGA-CV-7235 | 7.3168499  | 1.858737  | #NUM!      | 1 | 2 | HNSC | 99999  | 0.0 | 116 | 18  |
| TCGA-MZ-A6I9 | 7.41310068 | 0.4473147 | -1.1376478 | 1 | 2 | HNSC | 99999  | 1.0 | NA  | NA  |
| TCGA-QK-A8ZB | 7.72102192 | 0.7350022 | #NUM!      | 1 | 2 | HNSC | 99999  | 0.0 | NA  | NA  |
| TCGA-CV-A6JZ | 7.51216683 | 2.6996183 | -1.5483537 | 1 | 2 | HNSC | 23.46  | 0.0 | NA  | NA  |
| TCGA-CR-6473 | 7.50850868 | 0.4541759 | -1.1306813 | 1 | 2 | HNSC | 36.96  | 0.0 | 85  | 14  |
| TCGA-CN-4726 | 7.12650212 | 1.5355553 | #NUM!      | 1 | 2 | HNSC | 4.66   | 1.0 | 69  | 13  |
| TCGA-CN-5360 | 7.60944767 | 4.6621485 | -1.2206142 | 1 | 2 | HNSC | 71.25  | 0.0 | 426 | 44  |
| TCGA-KU-A66S | 8.31915275 | 5.8453144 | #NUM!      | 1 | 2 | HNSC | 13.34  | 1.0 | NA  | NA  |
| TCGA-BA-4074 | 7.68210834 | 3.2093286 | #NUM!      | 1 | 2 | HNSC | 15.18  | 1.0 | 131 | 33  |
| TCGA-CQ-6220 | 7.18548997 | 1.6883147 | #NUM!      | 1 | 2 | HNSC | 32.36  | 1.0 | 97  | 18  |
| TCGA-CR-7386 | 7.95490294 | 2.3668957 | #NUM!      | 1 | 2 | HNSC | 46.98  | 0.0 | 161 | 23  |
| TCGA-CN-4736 | 7.53205586 | 2.8076846 | #NUM!      | 1 | 2 | HNSC | 12.98  | 1.0 | 87  | 12  |
| TCGA-CR-7388 | 7.71295957 | 2.9376645 | #NUM!      | 1 | 2 | HNSC | 27.04  | 1.0 | 622 | 115 |
| TCGA-CN-4734 | 7.69582265 | 0.4734233 | #NUM!      | 1 | 2 | HNSC | 55.52  | 0.0 | NA  | 27  |
| TCGA-CV-A460 | 8.41608392 | 1.2912499 | -1.0306192 | 1 | 2 | HNSC | 60.38  | 1.0 | NA  | NA  |
| TCGA-F7-A624 | 9.18210653 | 3.9855642 | #NUM!      | 1 | 2 | HNSC | 12.42  | 0.0 | NA  | NA  |
| TCGA-CN-4729 | 7.13661181 | 2.1923204 | -1.1297339 | 1 | 2 | HNSC | 12.88  | 0.0 | 121 | 23  |
| TCGA-DQ-5630 | 7.34995525 | 3.8996977 | #NUM!      | 1 | 2 | HNSC | 00000  | 0.0 | 70  | 16  |
| TCGA-BB-4225 | 9.53079061 | 1.1053428 | #NUM!      | 1 | 2 | HNSC | 4.8    | 0.0 | 62  | 8   |
| TCGA-CQ-5331 | 7.10641951 | 2.8770964 | #NUM!      | 1 | 2 | HNSC | 45.96  | 0.0 | 135 | 27  |
| TCGA-CN-6023 | 7.06356118 | 1.6643008 | #NUM!      | 1 | 2 | HNSC | 52.04  | 0.0 | 97  | 29  |

|              |            |           |            |   |   |      |       |     |     |    |
|--------------|------------|-----------|------------|---|---|------|-------|-----|-----|----|
| TCGA-T2-A6WX | 7.45467519 | 2.4878465 | -0.9717138 | 1 | 2 | HNSC | 6.87  | 1.0 | NA  | NA |
| TCGA-HD-A633 | 7.93889502 | 3.8446869 | #NUM!      | 1 | 2 | HNSC | 13.83 | 0.0 | NA  | NA |
| TCGA-CV-6943 | 7.92185046 | 2.1483484 | -1.6588112 | 1 | 2 | HNSC | 19.78 | 1.0 | 51  | 14 |
| TCGA-CV-7413 | 7.62917737 | 1.397803  | #NUM!      | 1 | 2 | HNSC | 9.66  | 1.0 | 60  | 15 |
| TCGA-CV-A45Z | 7.49092226 | 1.5367492 | -1.0481139 | 1 | 2 | HNSC | 48.16 | 1.0 | NA  | NA |
| TCGA-CV-7437 | 8.03821832 | 0.4067543 | #NUM!      | 1 | 2 | HNSC | 16.62 | 1.0 | 117 | NA |
| TCGA-BA-A4IG | 7.19278004 | 1.5576307 | #NUM!      | 1 | 2 | HNSC | 28.09 | 0.0 | NA  | NA |
| TCGA-CV-7236 | 7.68345786 | 2.1250228 | #NUM!      | 1 | 2 | HNSC | 00000 | 1.0 | 43  | 8  |
| TCGA-CQ-A4CC | 7.50576948 | 0.2769135 | #NUM!      | 1 | 2 | HNSC | 14.13 | 1.0 | NA  | NA |
| TCGA-CN-6995 | 7.10855059 | 2.8166407 | #NUM!      | 1 | 2 | HNSC | 3.68  | 1.0 | 196 | 28 |
| TCGA-CR-7379 | 8.28866817 | 2.2626136 | #NUM!      | 1 | 2 | HNSC | 34.03 | 0.0 | 118 | 32 |
| TCGA-UF-A7JO | 7.40608508 | 2.2634551 | #NUM!      | 1 | 2 | HNSC | 20.73 | 1.0 | NA  | NA |
| TCGA-QK-A64Z | 7.35971618 | 1.3263072 | #NUM!      | 1 | 2 | HNSC | 21.06 | 1.0 | NA  | NA |
| TCGA-HD-A6HZ | 7.84639616 | 2.075293  | #NUM!      | 1 | 2 | HNSC | 3.65  | 0.0 | NA  | NA |
| TCGA-CQ-6221 | 7.83956977 | 0.5643294 | #NUM!      | 1 | 2 | HNSC | 32.85 | 0.0 | 106 | 23 |
| TCGA-CR-7395 | 7.93099333 | 3.3374685 | #NUM!      | 1 | 2 | HNSC | 30.55 | 0.0 | 139 | 22 |
| TCGA-CV-7101 | 7.44069645 | 2.5443123 | -1.262919  | 1 | 2 | HNSC | 5.26  | 1.0 | 171 | 41 |
| TCGA-UF-A7JF | 7.30290299 | 1.7388975 | #NUM!      | 1 | 2 | HNSC | 55.39 | 0.0 | NA  | NA |
| TCGA-CN-5361 | 7.11778749 | 0.8186052 | -1.1814766 | 1 | 2 | HNSC | 00000 | 1.0 | NA  | 24 |
| TCGA-RS-A6TO | 8.21276386 | 6.0874628 | #NUM!      | 1 | 2 | HNSC | 12.71 | 1.0 | NA  | NA |
| TCGA-D6-6515 | 8.42965404 | 2.5769091 | -1.3298848 | 1 | 2 | HNSC | 13.24 | 1.0 | 49  | 5  |
| TCGA-BA-4078 | 7.94223239 | 1.0491428 | #NUM!      | 1 | 2 | HNSC | 9.07  | 1.0 | 365 | 44 |
| TCGA-CV-6938 | 7.11889125 | 2.0821576 | #NUM!      | 1 | 2 | HNSC | 00000 | 1.0 | 141 | 26 |
| TCGA-CV-7438 | 7.99071326 | 0.8160672 | #NUM!      | 1 | 2 | HNSC | 6.37  | 1.0 | 95  | 24 |
| TCGA-CQ-A4C7 | 8.30920712 | 0.9392266 | -1.0606982 | 1 | 2 | HNSC | 11.6  | 1.0 | NA  | NA |
| TCGA-TM-A84J | 7.9930     | 0.7388    | #NUM!      | 1 | 2 | LGG  | 24.15 | 0   | NA  | NA |
| TCGA-DU-5870 | 7.7213     | 0.8617    | #NUM!      | 1 | 2 | LGG  | ####  | 0   | 13  | 5  |
| TCGA-FG-8191 | 7.5110     | 0.8620    | #NUM!      | 1 | 2 | LGG  | 32.59 | 0   | 16  | 6  |
| TCGA-CS-6668 | 7.5313     | 1.0322    | #NUM!      | 1 | 2 | LGG  | 49.90 | 0   | 17  | 9  |
| TCGA-E1-A7YI | 7.7303     | 1.2114    | -1.5960    | 1 | 2 | LGG  | 3.65  | 1   | NA  | NA |
| TCGA-S9-A7R4 | 7.2412     | 1.4821    | #NUM!      | 1 | 2 | LGG  | 30.03 | 0   | NA  | NA |
| TCGA-HT-7601 | 7.4756     | 1.5044    | #NUM!      | 1 | 2 | LGG  | 5.03  | 0   | 15  | 6  |
| TCGA-DU-7290 | 7.3576     | 1.5369    | #NUM!      | 1 | 2 | LGG  | 10.35 | 1   | 28  | 12 |
| TCGA-FG-A60J | 7.3240     | 1.5464    | #NUM!      | 1 | 2 | LGG  | 14.75 | 0   | 29  | 7  |
| TCGA-QH-A6XA | 7.6281     | 1.6413    | #NUM!      | 1 | 2 | LGG  | 16.49 | 0   | NA  | NA |
| TCGA-DU-7013 | 7.5256     | 1.8616    | #NUM!      | 1 | 2 | LGG  | 8.84  | 1   | 28  | NA |
| TCGA-HT-7620 | 7.2627     | 1.8829    | #NUM!      | 1 | 2 | LGG  | 14.26 | 0   | 16  | NA |
| TCGA-DH-5144 | 7.1996     | 1.9269    | #NUM!      | 1 | 2 | LGG  | 24.57 | 0   | 25  | 11 |
| TCGA-HT-A618 | 7.2293     | 1.9348    | #NUM!      | 1 | 2 | LGG  | 16.82 | 0   | 17  | 5  |
| TCGA-CS-6290 | 7.8650     | 1.9559    | #NUM!      | 1 | 2 | LGG  | 37.35 | 1   | 16  | 6  |
| TCGA-DB-A4XB | 7.8164     | 2.0987    | #NUM!      | 1 | 2 | LGG  | 30.19 | 0   | 24  | 9  |
| TCGA-HT-7686 | 7.8221     | 2.2489    | #NUM!      | 1 | 2 | LGG  | 42.71 | 0   | 15  | NA |
| TCGA-QH-A65S | 7.1618     | 2.2916    | #NUM!      | 1 | 2 | LGG  | 2.53  | 0   | 16  | 8  |
| TCGA-DU-7010 | 7.1695     | 2.5916    | -1.7302    | 1 | 2 | LGG  | 14.98 | 1   | 82  | NA |
| TCGA-DH-5140 | 7.3303     | 2.6962    | #NUM!      | 1 | 2 | LGG  | 19.94 | 1   | 20  | NA |
| TCGA-TQ-A7RR | 7.4634     | 3.0228    | #NUM!      | 1 | 2 | LGG  | 25.85 | 0   | NA  | NA |
| TCGA-CS-6665 | 7.1830     | 3.0240    | #NUM!      | 1 | 2 | LGG  | 51.51 | 0   | 60  | 16 |
| TCGA-DU-6403 | 7.4379     | 3.1310    | #NUM!      | 1 | 2 | LGG  | 11.63 | 1   | 46  | NA |
| TCGA-DB-5277 | 7.6049     | 3.1900    | #NUM!      | 1 | 2 | LGG  | 50.82 | 1   | 29  | 7  |
| TCGA-S9-A89V | 7.6004     | 3.2590    | #NUM!      | 1 | 2 | LGG  | 18.69 | 0   | NA  | NA |
| TCGA-HT-7902 | 7.3841     | 3.6131    | #NUM!      | 1 | 2 | LGG  | 31.41 | 0   | 17  | 11 |
| TCGA-HT-8106 | 7.9609     | 3.9858    | #NUM!      | 1 | 2 | LGG  | 0.10  | 0   | 20  | 8  |
| TCGA-HT-7680 | 7.8626     | 4.3297    | #NUM!      | 1 | 2 | LGG  | 0.76  | 0   | 1   | 4  |
| TCGA-HW-A5Kk | 7.7119     | 4.3326    | #NUM!      | 1 | 2 | LGG  | 12.75 | 1   | 24  | NA |

|              |         |         |          |   |   |      |       |   |      |     |
|--------------|---------|---------|----------|---|---|------|-------|---|------|-----|
| TCGA-S9-A7R2 | 7.7593  | 4.7888  | #NUM!    | 1 | 2 | LGG  | 10.38 | 1 | NA   | NA  |
| TCGA-FG-5963 | 8.1076  | 6.1289  | #NUM!    | 1 | 2 | LGG  | 25.46 | 1 | 20   | NA  |
| TCGA-OR-A5K5 | 8.2352  | 0.8777  | 0.4626   | 1 | 2 | ACC  | 16.36 | 1 | 137  | NA  |
| TCGA-OR-A5JM | 7.8995  | 0.3708  | -1.2142  | 1 | 2 | ACC  | 18.46 | 1 | 75   | NA  |
| TCGA-3N-A9WC | 7.76602 | 8.80580 | #NUM!    | 1 | 2 | SKCM | 13    | 1 | NA   | NA  |
| TCGA-FS-A1ZK | 7.48572 | 6.69420 | #NUM!    | 1 | 2 | SKCM | 24    | 1 | 1257 | 184 |
| TCGA-D3-A1QB | 7.19600 | 6.64733 | #NUM!    | 1 | 2 | SKCM | 96    | 0 | 293  | NA  |
| TCGA-D9-A4Z6 | 8.71452 | 6.59102 | #NUM!    | 1 | 2 | SKCM | 18    | 1 | NA   | NA  |
| TCGA-HR-A5NC | 7.71613 | 5.97952 | #NUM!    | 1 | 2 | SKCM | 33    | 0 | NA   | NA  |
| TCGA-W3-AA1V | 7.22481 | 5.31324 | #NUM!    | 1 | 2 | SKCM | 42    | 1 | NA   | NA  |
| TCGA-ER-A2NC | 9.01806 | 5.02386 | #NUM!    | 1 | 2 | SKCM | 44    | 1 | 308  | NA  |
| TCGA-FR-A2OS | 7.16345 | 4.95257 | #NUM!    | 1 | 2 | SKCM | 12    | 1 | 32   | 7   |
| TCGA-DA-A3F8 | 8.15977 | 4.94573 | -1.63935 | 1 | 2 | SKCM | 43    | 0 | 947  | NA  |
| TCGA-HR-A2OF | 7.92336 | 4.73019 | #NUM!    | 1 | 2 | SKCM | 66    | 1 | NA   | NA  |
| TCGA-D3-A51R | 8.59057 | 4.69426 | #NUM!    | 1 | 2 | SKCM | 64    | 0 | 570  | NA  |
| TCGA-ER-A2NH | 8.33670 | 4.25919 | #NUM!    | 1 | 2 | SKCM | 42    | 0 | 246  | NA  |
| TCGA-W3-A825 | 8.04260 | 4.25698 | #NUM!    | 1 | 2 | SKCM | 63    | 1 | NA   | NA  |
| TCGA-D3-A2JO | 7.73618 | 4.21016 | #NUM!    | 1 | 2 | SKCM | 66    | 0 | 503  | 85  |
| TCGA-ER-A3EV | 8.14026 | 3.99342 | #NUM!    | 1 | 2 | SKCM | 47    | 1 | 95   | 18  |
| TCGA-EB-A85J | 7.27632 | 3.95439 | #NUM!    | 1 | 2 | SKCM | 12    | 0 | NA   | NA  |
| TCGA-D3-A1Q8 | 7.40858 | 3.86653 | -1.55979 | 1 | 2 | SKCM | 28    | 1 | 189  | NA  |
| TCGA-D9-A6E9 | 8.34500 | 3.71916 | #NUM!    | 1 | 2 | SKCM | 10    | 0 | 154  | NA  |
| TCGA-ER-A2NG | 8.22550 | 3.67954 | -1.77992 | 1 | 2 | SKCM | 49    | 1 | 209  | NA  |
| TCGA-EE-A2GH | 7.87165 | 3.55316 | #NUM!    | 1 | 2 | SKCM | 220   | 0 | 264  | NA  |
| TCGA-GF-A4EO | 8.26649 | 3.52224 | #NUM!    | 1 | 2 | SKCM | 19    | 0 | NA   | NA  |
| TCGA-W3-AA1W | 7.17288 | 3.50150 | #NUM!    | 1 | 2 | SKCM | 219   | 0 | NA   | NA  |
| TCGA-ER-A19S | 7.87275 | 3.44765 | #NUM!    | 1 | 2 | SKCM | 49    | 0 | 181  | NA  |
| TCGA-EE-A2A2 | 7.82779 | 3.40515 | #NUM!    | 1 | 2 | SKCM | 60    | 0 | 1422 | NA  |
| TCGA-FS-A4FB | 7.34966 | 3.34616 | #NUM!    | 1 | 2 | SKCM | 27    | 1 | 157  | NA  |
| TCGA-FS-A1ZH | 7.75002 | 3.29724 | -1.65699 | 1 | 2 | SKCM | 33    | 1 | 28   | NA  |
| TCGA-WE-A8K4 | 7.33577 | 3.26864 | #NUM!    | 1 | 2 | SKCM | 20    | 0 | NA   | NA  |
| TCGA-EE-A2MU | 8.26877 | 3.25905 | #NUM!    | 1 | 2 | SKCM | 53    | 0 | 550  | 89  |
| TCGA-D3-A1Q7 | 7.98977 | 3.21079 | -1.78936 | 1 | 2 | SKCM | 133   | 0 | 73   | NA  |
| TCGA-ER-A19G | 8.27523 | 3.18607 | #NUM!    | 1 | 2 | SKCM | 302   | 0 | 407  | NA  |
| TCGA-D3-A2J9 | 8.22790 | 3.18007 | #NUM!    | 1 | 2 | SKCM | 24    | 1 | 54   | NA  |
| TCGA-EE-A17Z | 7.74697 | 3.15950 | #NUM!    | 1 | 2 | SKCM | 9     | 1 | 31   | NA  |
| TCGA-D3-A3CB | 7.61742 | 3.15602 | #NUM!    | 1 | 2 | SKCM | 166   | 0 | 210  | NA  |
| TCGA-BF-AAP0 | 7.57095 | 3.14561 | #NUM!    | 1 | 2 | SKCM | 15    | 0 | NA   | NA  |
| TCGA-EE-A29X | 7.87157 | 3.14401 | #NUM!    | 1 | 2 | SKCM | 18    | 1 | 113  | NA  |
| TCGA-RP-A694 | 7.45615 | 3.13722 | #NUM!    | 1 | 2 | SKCM | 1     | 0 | 552  | NA  |
| TCGA-D3-A8GD | 7.39404 | 3.11058 | #NUM!    | 1 | 2 | SKCM | 24    | 0 | NA   | NA  |
| TCGA-FR-A7UA | 8.68535 | 3.08544 | #NUM!    | 1 | 2 | SKCM | 38    | 0 | NA   | NA  |
| TCGA-D9-A3Z3 | 7.59295 | 3.05043 | #NUM!    | 1 | 2 | SKCM | 22    | 0 | 111  | NA  |
| TCGA-FR-A7U9 | 8.41338 | 3.04551 | #NUM!    | 1 | 2 | SKCM | 19    | 0 | NA   | NA  |
| TCGA-EE-A2MJ | 8.25880 | 2.96756 | #NUM!    | 1 | 2 | SKCM | 96    | 1 | 1847 | NA  |
| TCGA-ER-A199 | 7.74362 | 2.94272 | #NUM!    | 1 | 2 | SKCM | 9     | 1 | 224  | NA  |
| TCGA-GN-A263 | 7.60562 | 2.91911 | #NUM!    | 1 | 2 | SKCM | 15    | 1 | 357  | 58  |
| TCGA-EE-A29P | 7.23987 | 2.91865 | #NUM!    | 1 | 2 | SKCM | 56    | 0 | 241  | NA  |
| TCGA-ER-A19N | 8.72694 | 2.87941 | #NUM!    | 1 | 2 | SKCM | 44    | 1 | 398  | NA  |
| TCGA-EB-A550 | 7.23654 | 2.87196 | #NUM!    | 1 | 2 | SKCM | 9     | 1 | NA   | NA  |
| TCGA-EE-A3JH | 8.13312 | 2.87074 | #NUM!    | 1 | 2 | SKCM | 134   | 0 | 154  | NA  |
| TCGA-DA-A1HW | 7.56935 | 2.77524 | #NUM!    | 1 | 2 | SKCM | 36    | 1 | 261  | NA  |
| TCGA-BF-A5EO | 7.50367 | 2.74586 | #NUM!    | 1 | 2 | SKCM | 23    | 0 | 498  | NA  |
| TCGA-AJ-A6NU | 11.6764 | 3.6443  | #NUM!    | 1 | 2 | UCEC | 21    | 0 | NA   | NA  |

|              |            |           |            |   |   |      |     |   |      |      |
|--------------|------------|-----------|------------|---|---|------|-----|---|------|------|
| TCGA-A5-A2K4 | 9.7628     | 3.4313    | -0.8906    | 1 | 2 | UCEC | 29  | 1 | NA   | NA   |
| TCGA-D1-A3JP | 9.3978     | 3.3828    | #NUM!      | 1 | 2 | UCEC | 17  | 0 | NA   | NA   |
| TCGA-AJ-A3IA | 8.7834     | 3.1595    | #NUM!      | 1 | 2 | UCEC | 21  | 0 | NA   | NA   |
| TCGA-EO-A22U | 8.5058     | 4.2007    | -1.0847    | 1 | 2 | UCEC | 46  | 0 | NA   | NA   |
| TCGA-A5-A2K3 | 8.3593     | 4.1356    | #NUM!      | 1 | 2 | UCEC | 66  | 0 | NA   | NA   |
| TCGA-EO-A3KU | 8.2947     | 4.8860    | #NUM!      | 1 | 2 | UCEC | 22  | 0 | NA   | NA   |
| TCGA-AJ-A3NE | 8.1522     | 5.3009    | #NUM!      | 1 | 2 | UCEC | 21  | 0 | NA   | NA   |
| TCGA-B5-A5OC | 7.9026     | 4.0200    | #NUM!      | 1 | 2 | UCEC | 41  | 0 | NA   | NA   |
| TCGA-05-4250 | 9.37067492 | 8.858181  | 3.47337    | 2 | 2 | LUAD | 4   | 1 | NA   | 52   |
| TCGA-97-8174 | 9.14543467 | 5.1189436 | 5.3691597  | 2 | 2 | LUAD | 5   | 1 | NA   | NA   |
| TCGA-38-4628 | 10.4559986 | 5.1081384 | 9.2406989  | 2 | 2 | LUAD | 49  | 1 | 131  | 21   |
| TCGA-05-4403 | 11.0083942 | 5.002707  | 3.2088247  | 2 | 2 | LUAD | 19  | 0 | 122  | 28   |
| TCGA-97-7553 | 9.36882098 | 4.8838627 | 3.5149769  | 2 | 2 | LUAD | 61  | 0 | 79   | NA   |
| TCGA-55-8619 | 10.2580266 | 4.7475748 | 4.2258664  | 2 | 2 | LUAD | 14  | 0 | NA   | NA   |
| TCGA-55-7816 | 9.17910436 | 4.5848435 | 3.8280862  | 2 | 2 | LUAD | 15  | 1 | #N/A | #N/A |
| TCGA-49-6744 | 9.24610011 | 4.5604105 | 4.5603909  | 2 | 2 | LUAD | 55  | 0 | 238  | 42   |
| TCGA-44-6778 | 9.34030874 | 4.5551149 | 3.5598026  | 2 | 2 | LUAD | 61  | 0 | NA   | 73   |
| TCGA-55-1592 | 9.5302013  | 4.5279398 | 5.4541499  | 2 | 2 | LUAD | 23  | 1 | 500  | 67   |
| TCGA-44-6148 | 9.24006859 | 4.4137538 | 5.6274551  | 2 | 2 | LUAD | 23  | 0 | NA   | 3    |
| TCGA-38-4632 | 10.3849572 | 4.4111401 | 5.4545507  | 2 | 2 | LUAD | 45  | 1 | 459  | 75   |
| TCGA-49-4501 | 9.60639798 | 4.3109065 | 4.4732518  | 2 | 2 | LUAD | 47  | 1 | 68   | 19   |
| TCGA-49-4505 | 9.16914922 | 4.1881311 | 4.8275792  | 2 | 2 | LUAD | 14  | 1 | 162  | 23   |
| TCGA-S2-AA1A | 9.36966284 | 4.0645156 | 4.897238   | 2 | 2 | LUAD | 17  | 0 | NA   | NA   |
| TCGA-99-7458 | 9.26669606 | 3.9726311 | 4.3100485  | 2 | 2 | LUAD | 25  | 0 | 419  | NA   |
| TCGA-78-7539 | 9.38869214 | 3.9490502 | 5.4130948  | 2 | 2 | LUAD | 26  | 0 | 415  | NA   |
| TCGA-75-5147 | 8.81531124 | 3.932699  | 1.9432912  | 2 | 2 | LUAD | 44  | 0 | 47   | 8    |
| TCGA-86-A4JF | 8.3555964  | 3.8608446 | 1.5348037  | 2 | 2 | LUAD | 24  | 1 | NA   | NA   |
| TCGA-MP-A4TF | 7.78512907 | 3.8433829 | 1.2893446  | 2 | 2 | LUAD | 11  | 1 | NA   | NA   |
| TCGA-78-7162 | 8.80442215 | 3.8324374 | 0.7066853  | 2 | 2 | LUAD | 104 | 1 | 83   | NA   |
| TCGA-55-8090 | 8.65255938 | 3.7867856 | 3.0173643  | 2 | 2 | LUAD | 20  | 1 | NA   | NA   |
| TCGA-05-4395 | 9.00277036 | 3.7556332 | -0.8676469 | 2 | 2 | LUAD | 0   | 1 | 218  | 38   |
| TCGA-78-8640 | 7.98981761 | 3.7408563 | -4.2734129 | 2 | 2 | LUAD | 232 | 0 | NA   | NA   |
| TCGA-67-6217 | 8.24267833 | 3.7272572 | 1.738396   | 2 | 2 | LUAD | 14  | 0 | 168  | 26   |
| TCGA-78-7159 | 8.66972976 | 3.7069316 | #NUM!      | 2 | 2 | LUAD | 65  | 0 | 254  | NA   |
| TCGA-05-4426 | 8.19782898 | 3.6494465 | 1.0446529  | 2 | 2 | LUAD | 26  | 0 | 49   | 20   |
| TCGA-55-A494 | 8.25796594 | 3.6239851 | 2.0247062  | 2 | 2 | LUAD | 16  | 0 | NA   | NA   |
| TCGA-80-5608 | 8.75655859 | 3.5908415 | -0.4120398 | 2 | 2 | LUAD | 93  | 0 | 146  | NA   |
| TCGA-64-1677 | 8.64217808 | 3.5239408 | -2.2433866 | 2 | 2 | LUAD | 21  | 1 | 216  | 35   |
| TCGA-64-5778 | 8.1393644  | 3.4650785 | 1.1597777  | 2 | 2 | LUAD | 43  | 0 | 410  | 73   |
| TCGA-55-8508 | 8.7803668  | 3.3381035 | 3.0817248  | 2 | 2 | LUAD | 20  | 0 | NA   | NA   |
| TCGA-69-7763 | 8.85136015 | 3.3147806 | 2.9038385  | 2 | 2 | LUAD | 23  | 0 | 70   | NA   |
| TCGA-44-4112 | 7.20511985 | 3.2906559 | #NUM!      | 2 | 2 | LUAD | 27  | 1 | 377  | 60   |
| TCGA-83-5908 | 8.78558942 | 3.2852291 | #NUM!      | 2 | 2 | LUAD | 27  | 0 | NA   | NA   |
| TCGA-55-1596 | 7.21776368 | 3.2841469 | 0.3464861  | 2 | 2 | LUAD | 68  | 0 | 165  | 37   |
| TCGA-93-8067 | 7.9862666  | 3.2626677 | 1.3079822  | 2 | 2 | LUAD | 6   | 0 | NA   | NA   |
| TCGA-50-5051 | 8.19727327 | 3.0676628 | 3.0675355  | 2 | 2 | LUAD | 16  | 1 | 107  | 23   |
| TCGA-44-3918 | 9.02670438 | 3.0662046 | -4.4331556 | 2 | 2 | LUAD | 34  | 0 | NA   | 150  |
| TCGA-78-7537 | 8.37067926 | 3.0317657 | 2.8927349  | 2 | 2 | LUAD | 53  | 1 | 128  | NA   |
| TCGA-64-1676 | 8.15064243 | 2.9720456 | 2.9718801  | 2 | 2 | LUAD | 57  | 0 | 495  | 56   |
| TCGA-55-6972 | 7.51345585 | 2.9183805 | -2.3268416 | 2 | 2 | LUAD | 54  | 1 | 245  | NA   |
| TCGA-95-7948 | 7.08052081 | 2.8543927 | -0.8036196 | 2 | 2 | LUAD | 16  | 0 | 152  | NA   |
| TCGA-86-8279 | 7.69367882 | 2.8359463 | 2.4117896  | 2 | 2 | LUAD | 31  | 0 | NA   | NA   |
| TCGA-71-6725 | 7.77635736 | 2.7504865 | 0.9641029  | 2 | 2 | LUAD | 8   | 0 | 56   | 37   |
| TCGA-69-A59K | 8.21410902 | 2.7336407 | 0.5058198  | 2 | 2 | LUAD | 19  | 0 | NA   | NA   |

|              |            |           |            |   |   |      |     |   |      |      |
|--------------|------------|-----------|------------|---|---|------|-----|---|------|------|
| TCGA-97-7937 | 6.91210528 | 2.6594885 | #NUM!      | 2 | 2 | LUAD | 19  | 0 | 408  | NA   |
| TCGA-05-4249 | 8.90012463 | 2.6316747 | 1.0033072  | 2 | 2 | LUAD | 50  | 0 | 297  | 49   |
| TCGA-86-8281 | 8.32669409 | 2.5621105 | 2.3665516  | 2 | 2 | LUAD | 0   | 0 | NA   | NA   |
| TCGA-44-2659 | 8.62841499 | 2.4629501 | 0.18997    | 2 | 2 | LUAD | 45  | 0 | 364  | 75   |
| TCGA-73-4670 | 8.267016   | 2.3811726 | 2.3812141  | 2 | 2 | LUAD | 4   | 0 | NA   | 74   |
| TCGA-73-7499 | 8.57724334 | 2.2654729 | -0.6993022 | 2 | 2 | LUAD | 50  | 1 | 76   | NA   |
| TCGA-73-4677 | 8.61603673 | 2.2269709 | 2.751408   | 2 | 2 | LUAD | 1   | 1 | NA   | 26   |
| TCGA-55-7815 | 8.90784904 | 2.1243811 | -2.0313268 | 2 | 2 | LUAD | 25  | 0 | 127  | NA   |
| TCGA-49-AARQ | 7.68192659 | 2.0566806 | -6.7704367 | 2 | 2 | LUAD | 221 | 0 | NA   | NA   |
| TCGA-44-3917 | 6.89485971 | 1.8913142 | 1.3186061  | 2 | 2 | LUAD | 39  | 0 | #N/A | #N/A |
| TCGA-95-7562 | 8.76114087 | 1.8232521 | -0.6272484 | 2 | 2 | LUAD | 3   | 1 | NA   | NA   |
| TCGA-44-2656 | 8.8376939  | 1.669494  | 1.6695529  | 2 | 2 | LUAD | 47  | 0 | 989  | 128  |
| TCGA-62-A46V | 8.49360755 | 1.4098797 | -0.2062123 | 2 | 2 | LUAD | 72  | 0 | NA   | NA   |
| TCGA-78-7535 | 8.15142231 | 0.5203468 | 2.7461945  | 2 | 2 | LUAD | 31  | 1 | 142  | NA   |
| TCGA-86-8674 | 8.86875031 | 0.4619057 | 0.4620418  | 2 | 2 | LUAD | 26  | 0 | NA   | NA   |
| TCGA-86-7714 | 8.509413   | -2.267705 | 1.0828184  | 2 | 2 | LUAD | 21  | 1 | 69   | NA   |
| TCGA-55-8206 | 9.8196947  | 6.8044971 | 10.193027  | 2 | 2 | LUAD | 29  | 0 | NA   | NA   |
| TCGA-69-7973 | 9.60092639 | 6.2953199 | 5.0324368  | 2 | 2 | LUAD | 8   | 0 | NA   | NA   |
| TCGA-69-8453 | 9.99053214 | 5.8621372 | 3.5637646  | 2 | 2 | LUAD | 27  | 0 | NA   | NA   |
| TCGA-78-8648 | 9.17104704 | 5.6259978 | 5.5330902  | 2 | 2 | LUAD | 40  | 1 | NA   | NA   |
| TCGA-50-8459 | 9.641978   | 5.4526946 | 7.6643639  | 2 | 2 | LUAD | 37  | 0 | NA   | NA   |
| TCGA-38-4627 | 9.35178334 | 5.3092617 | 3.6556484  | 2 | 2 | LUAD | 38  | 1 | 33   | 10   |
| TCGA-05-5425 | 10.2779814 | 4.9834319 | 3.221161   | 2 | 2 | LUAD | 29  | 0 | NA   | 54   |
| TCGA-86-8671 | 9.36441373 | 4.795208  | 3.3633519  | 2 | 2 | LUAD | 28  | 0 | NA   | NA   |
| TCGA-99-8028 | 9.51351828 | 4.7281045 | 3.9730308  | 2 | 2 | LUAD | 37  | 0 | NA   | NA   |
| TCGA-97-A4M5 | 9.95553941 | 4.6377673 | 5.4741407  | 2 | 2 | LUAD | 21  | 0 | NA   | NA   |
| TCGA-44-6777 | 9.55197515 | 4.5246887 | 5.5971903  | 2 | 2 | LUAD | 32  | 1 | 337  | 80   |
| TCGA-50-5055 | 9.20984075 | 4.5228498 | 7.2621074  | 2 | 2 | LUAD | 60  | 1 | 20   | 5    |
| TCGA-55-8616 | 9.61237117 | 4.4213694 | 5.0984208  | 2 | 2 | LUAD | 2   | 0 | NA   | NA   |
| TCGA-55-A48Z | 9.60823963 | 4.3473212 | 3.3427894  | 2 | 2 | LUAD | 21  | 0 | NA   | NA   |
| TCGA-91-7771 | 10.0581918 | 4.3368682 | 4.6120635  | 2 | 2 | LUAD | 16  | 0 | 194  | NA   |
| TCGA-38-A44F | 9.82824331 | 4.2356895 | 4.1532946  | 2 | 2 | LUAD | 4   | 0 | NA   | NA   |
| TCGA-97-A4M7 | 9.29582795 | 4.0392955 | 4.5373097  | 2 | 2 | LUAD | 21  | 0 | NA   | NA   |
| TCGA-55-8507 | 9.12588727 | 4.0091796 | 3.8031237  | 2 | 2 | LUAD | 14  | 0 | NA   | NA   |
| TCGA-86-6562 | 8.99500878 | 3.9171224 | 2.6667339  | 2 | 2 | LUAD | 12  | 1 | 55   | 6    |
| TCGA-78-7163 | 7.71674416 | 3.871131  | #NUM!      | 2 | 2 | LUAD | 238 | 0 | 26   | NA   |
| TCGA-44-5644 | 9.02139575 | 3.8702878 | 0.3529958  | 2 | 2 | LUAD | 28  | 0 | NA   | NA   |
| TCGA-55-6712 | 8.71872092 | 3.8647953 | -2.7727025 | 2 | 2 | LUAD | 6   | 1 | 131  | 35   |
| TCGA-55-8620 | 7.98581012 | 3.8432774 | 1.7393686  | 2 | 2 | LUAD | 12  | 1 | NA   | NA   |
| TCGA-44-8119 | 7.72274955 | 3.8406354 | 0.5488114  | 2 | 2 | LUAD | 9   | 0 | NA   | NA   |
| TCGA-L9-A444 | 8.84969489 | 3.8045007 | 2.9386565  | 2 | 2 | LUAD | 10  | 0 | NA   | NA   |
| TCGA-50-5044 | 8.39229239 | 3.7987608 | 3.0189902  | 2 | 2 | LUAD | 20  | 1 | 118  | 41   |
| TCGA-55-6970 | 8.98449548 | 3.7813135 | 1.2483952  | 2 | 2 | LUAD | 15  | 1 | 161  | NA   |
| TCGA-55-8301 | 8.88440503 | 3.7506419 | 1.31166    | 2 | 2 | LUAD | 18  | 0 | NA   | NA   |
| TCGA-86-7953 | 8.57799307 | 3.7252754 | 1.3543167  | 2 | 2 | LUAD | 33  | 0 | NA   | NA   |
| TCGA-44-7667 | 8.74747545 | 3.7171533 | 0.6748854  | 2 | 2 | LUAD | 36  | 0 | NA   | NA   |
| TCGA-69-8255 | 8.13110353 | 3.6618328 | 0.0518454  | 2 | 2 | LUAD | 4   | 0 | NA   | NA   |
| TCGA-4B-A93V | 7.16138265 | 3.6316503 | 1.9271038  | 2 | 2 | LUAD | 10  | 1 | NA   | NA   |
| TCGA-78-7633 | 8.65908744 | 3.6080723 | 2.679631   | 2 | 2 | LUAD | 50  | 1 | 97   | NA   |
| TCGA-97-7554 | 8.54016552 | 3.5859925 | 1.5860778  | 2 | 2 | LUAD | 25  | 0 | 390  | NA   |
| TCGA-44-8117 | 7.44708852 | 3.4902646 | 2.8963804  | 2 | 2 | LUAD | 13  | 0 | NA   | NA   |
| TCGA-44-5645 | 8.8591702  | 3.4893554 | 3.0001875  | 2 | 2 | LUAD | 28  | 0 | 38   | 7    |
| TCGA-67-3770 | 7.82109861 | 3.4582468 | 2.8919596  | 2 | 2 | LUAD | 20  | 0 | NA   | 42   |
| TCGA-MP-A4T6 | 8.10767563 | 3.4366363 | 2.9267225  | 2 | 2 | LUAD | 59  | 1 | NA   | NA   |

|              |            |           |            |   |   |      |     |   |     |    |
|--------------|------------|-----------|------------|---|---|------|-----|---|-----|----|
| TCGA-78-7152 | 8.52201603 | 3.419013  | 2.1681478  | 2 | 2 | LUAD | 40  | 1 | 186 | NA |
| TCGA-NJ-A55R | 8.07830748 | 3.415395  | 2.8152865  | 2 | 2 | LUAD | 20  | 0 | NA  | NA |
| TCGA-49-4506 | 8.35177491 | 3.3915492 | 3.1015375  | 2 | 2 | LUAD | 33  | 1 | 120 | 25 |
| TCGA-64-5774 | 8.98357547 | 3.3372844 | -8.6040159 | 2 | 2 | LUAD | 88  | 0 | 124 | 15 |
| TCGA-95-7947 | 8.90532809 | 3.3243411 | -0.780785  | 2 | 2 | LUAD | 16  | 0 | 457 | NA |
| TCGA-95-A4VK | 8.96558388 | 3.2750428 | 2.6194107  | 2 | 2 | LUAD | 21  | 0 | NA  | NA |
| TCGA-80-5611 | 8.62981151 | 3.268069  | 0.3271815  | 2 | 2 | LUAD | 85  | 0 | NA  | 33 |
| TCGA-78-7149 | 8.36483784 | 3.2567254 | 3.0872014  | 2 | 2 | LUAD | 129 | 0 | 142 | NA |
| TCGA-78-7542 | 8.78998911 | 3.2381265 | #NUM!      | 2 | 2 | LUAD | 11  | 1 | 308 | NA |
| TCGA-55-7726 | 8.56410928 | 3.2031197 | 1.0233689  | 2 | 2 | LUAD | 21  | 0 | 110 | NA |
| TCGA-69-8253 | 8.48980285 | 3.1933412 | 0.908567   | 2 | 2 | LUAD | 14  | 0 | NA  | NA |
| TCGA-MP-A4T7 | 8.89011401 | 3.1456905 | 2.628363   | 2 | 2 | LUAD | 5   | 1 | NA  | NA |
| TCGA-55-8615 | 8.376756   | 3.1286563 | 2.4536598  | 2 | 2 | LUAD | 15  | 0 | NA  | NA |
| TCGA-55-8204 | 8.10494124 | 3.1064539 | 1.2019349  | 2 | 2 | LUAD | 17  | 0 | NA  | NA |
| TCGA-55-7903 | 7.91501787 | 3.0846409 | 0.7320086  | 2 | 2 | LUAD | 19  | 0 | 135 | NA |
| TCGA-44-5643 | 8.51768517 | 3.0125454 | 0.51081    | 2 | 2 | LUAD | 33  | 0 | NA  | 21 |
| TCGA-J2-A4AE | 8.22800647 | 2.9941669 | 2.5790498  | 2 | 2 | LUAD | 35  | 0 | NA  | NA |
| TCGA-55-A4DG | 8.7547655  | 2.9153813 | 2.4991468  | 2 | 2 | LUAD | 20  | 0 | NA  | NA |
| TCGA-MP-A4SY | 8.74031439 | 2.8423473 | 2.8423976  | 2 | 2 | LUAD | 49  | 1 | NA  | NA |
| TCGA-78-7156 | 8.8020075  | 2.8324668 | 1.844028   | 2 | 2 | LUAD | 32  | 1 | 250 | NA |
| TCGA-95-7567 | 8.66249189 | 2.7765041 | #NUM!      | 2 | 2 | LUAD | 19  | 0 | 839 | NA |
| TCGA-49-4486 | 7.73802158 | 2.6857787 | 2.4911117  | 2 | 2 | LUAD | 76  | 1 | 221 | 64 |
| TCGA-55-7914 | 8.5199823  | 2.5606612 | 0.9733615  | 2 | 2 | LUAD | 6   | 1 | 147 | NA |
| TCGA-05-5428 | 7.63199114 | 2.5289863 | 1.9762866  | 2 | 2 | LUAD | 22  | 0 | 319 | 53 |
| TCGA-50-5068 | 8.40582639 | 2.5272806 | 2.5271429  | 2 | 2 | LUAD | 49  | 1 | 86  | 12 |
| TCGA-69-7979 | 8.88143835 | 2.4672195 | 1.5944578  | 2 | 2 | LUAD | 13  | 0 | NA  | NA |
| TCGA-64-1678 | 6.80242718 | 2.4020454 | -2.5829441 | 2 | 2 | LUAD | 39  | 0 | 504 | 24 |
| TCGA-35-3615 | 8.02002331 | 2.3713191 | 2.3713525  | 2 | 2 | LUAD | 0   | 0 | 106 | 34 |
| TCGA-44-A47B | 8.13169792 | 2.1331032 | -0.2317352 | 2 | 2 | LUAD | 9   | 0 | NA  | NA |
| TCGA-44-A4SU | 8.15322794 | 1.9156165 | #NUM!      | 2 | 2 | LUAD | 13  | 1 | NA  | NA |
| TCGA-44-7671 | 8.8931158  | 1.8750998 | 1.8750802  | 2 | 2 | LUAD | 29  | 0 | 194 | NA |
| TCGA-95-7043 | 8.34719016 | 1.8691647 | 0.9470826  | 2 | 2 | LUAD | 17  | 1 | 967 | NA |
| TCGA-L9-A5IP | 8.64267966 | 1.8602795 | 2.6723326  | 2 | 2 | LUAD | 2   | 1 | NA  | NA |
| TCGA-78-7153 | 8.21094651 | 1.835152  | 0.2884176  | 2 | 2 | LUAD | 119 | 0 | 105 | NA |
| TCGA-64-1680 | 7.43577159 | 0.7564512 | 2.6539245  | 2 | 2 | LUAD | 37  | 0 | 77  | 9  |
| TCGA-L9-A50W | 8.74436002 | 0.4886076 | 1.0981433  | 2 | 2 | LUAD | 15  | 1 | NA  | NA |
| TCGA-MP-A5C7 | 8.94196063 | 0.2493847 | 1.3081045  | 2 | 2 | LUAD | 74  | 0 | NA  | NA |
| TCGA-NJ-A7XG | 7.78923882 | -0.192662 | 1.4212044  | 2 | 2 | LUAD | 20  | 0 | NA  | NA |
| TCGA-55-7727 | 8.11719191 | -2.592919 | -2.5955328 | 2 | 2 | LUAD | 4   | 0 | 222 | NA |
| TCGA-L4-A4E6 | 9.18684013 | 6.3303347 | 4.2543257  | 2 | 2 | LUAD | 14  | 0 | NA  | NA |
| TCGA-73-4659 | 9.97491053 | 5.866507  | 5.9737369  | 2 | 2 | LUAD | 23  | 1 | 184 | 21 |
| TCGA-50-6597 | 9.30382996 | 5.3734077 | 3.2824843  | 2 | 2 | LUAD | 42  | 1 | 54  | 13 |
| TCGA-93-7347 | 9.41968143 | 4.9158975 | 7.0133944  | 2 | 2 | LUAD | 22  | 0 | 117 | NA |
| TCGA-86-8073 | 9.71469687 | 3.9605794 | 3.711921   | 2 | 2 | LUAD | 24  | 0 | NA  | NA |
| TCGA-86-8054 | 8.62981333 | 3.8737778 | #NUM!      | 2 | 2 | LUAD | 38  | 0 | NA  | NA |
| TCGA-50-7109 | 9.02964066 | 3.8375386 | 1.617731   | 2 | 2 | LUAD | 10  | 1 | 226 | NA |
| TCGA-99-8025 | 8.10721917 | 3.7901767 | 1.3474842  | 2 | 2 | LUAD | 35  | 0 | NA  | NA |
| TCGA-55-6985 | 8.82230043 | 3.7792744 | 1.5065512  | 2 | 2 | LUAD | 41  | 0 | 411 | NA |
| TCGA-78-7161 | 8.69940036 | 3.5154438 | 1.7166134  | 2 | 2 | LUAD | 10  | 1 | 151 | NA |
| TCGA-55-8085 | 8.71387057 | 3.439445  | 0.9657437  | 2 | 2 | LUAD | 30  | 0 | NA  | NA |
| TCGA-86-A4D0 | 7.43347111 | 3.3115104 | 0.8328495  | 2 | 2 | LUAD | 4   | 1 | NA  | NA |
| TCGA-75-6214 | 8.4721797  | 3.2981289 | 0.9129334  | 2 | 2 | LUAD | 37  | 1 | 641 | NA |
| TCGA-91-6831 | 7.7501822  | 2.9237406 | 1.3682487  | 2 | 2 | LUAD | 10  | 0 | NA  | 51 |
| TCGA-86-8278 | 8.40594557 | 2.5940779 | 1.9900145  | 2 | 2 | LUAD | 31  | 0 | NA  | NA |

|              |            |           |            |   |   |      |       |     |     |     |
|--------------|------------|-----------|------------|---|---|------|-------|-----|-----|-----|
| TCGA-MN-A4N1 | 8.29982335 | 2.254854  | 2.4800272  | 2 | 2 | LUAD | 27    | 0   | NA  | NA  |
| TCGA-97-8171 | 8.94283998 | 2.0155511 | 1.7856133  | 2 | 2 | LUAD | 19    | 0   | NA  | NA  |
| TCGA-49-AAR2 | 7.2299474  | 1.800579  | 1.2244602  | 2 | 2 | LUAD | 73    | 0   | NA  | NA  |
| TCGA-69-7760 | 6.9034888  | 1.2474111 | -4.6489145 | 2 | 2 | LUAD | 7     | 0   | 81  | NA  |
| TCGA-49-4488 | 8.29872837 | -2.571579 | -2.574154  | 2 | 2 | LUAD | 29    | 1   | 261 | 37  |
| TCGA-C5-A1MJ | #####      | #####     | #####      | 2 | 2 | CESC | 0.46  | 1.0 | 73  | 22  |
| TCGA-VS-A94W | #####      | #####     | #####      | 2 | 2 | CESC | 40.83 | 0.0 | NA  | NA  |
| TCGA-VS-A9UR | #####      | #####     | #####      | 2 | 2 | CESC | 26.05 | 0.0 | NA  | NA  |
| TCGA-VS-A9V4 | #####      | #####     | #####      | 2 | 2 | CESC | 4.34  | 1.0 | NA  | NA  |
| TCGA-EA-A410 | #####      | #####     | #####      | 2 | 2 | CESC | 26.38 | 0.0 | 82  | 16  |
| TCGA-FU-A770 | #####      | #####     | #####      | 2 | 2 | CESC | 1.12  | 0.0 | 56  | 5   |
| TCGA-EK-A2PK | #####      | #####     | #####      | 2 | 2 | CESC | 0.39  | 0.0 | 4   | 1   |
| TCGA-EX-A3L1 | #####      | #####     | #####      | 2 | 2 | CESC | 15.21 | 0.0 | 28  | 4   |
| TCGA-JW-A69B | #####      | #####     | #####      | 2 | 2 | CESC | 28.35 | 0.0 | 83  | 15  |
| TCGA-C5-A3HE | #####      | #####     | #####      | 2 | 2 | CESC | 18.00 | 0.0 | 289 | 75  |
| TCGA-ZJ-A8QO | #####      | #####     | #####      | 2 | 2 | CESC | 0.00  | 0.0 | NA  | NA  |
| TCGA-C5-A7X5 | #####      | #####     | #####      | 2 | 2 | CESC | 13.60 | 1.0 | NA  | NA  |
| TCGA-EK-A2PM | #####      | #####     | #####      | 2 | 2 | CESC | 0.59  | 0.0 | 255 | 55  |
| TCGA-EK-A2RC | #####      | #####     | #####      | 2 | 2 | CESC | 4.24  | 0.0 | 144 | 21  |
| TCGA-C5-A1M6 | #####      | #####     | #####      | 2 | 2 | CESC | 31.37 | 1.0 | 111 | 26  |
| TCGA-FU-A23L | #####      | #####     | #####      | 2 | 2 | CESC | 23.82 | 0.0 | 128 | 34  |
| TCGA-Q1-A6DV | #####      | #####     | #####      | 2 | 2 | CESC | 16.13 | 0.0 | 34  | 3   |
| TCGA-DR-A0ZL | #####      | #####     | #####      | 2 | 2 | CESC | 87.68 | 0.0 | 46  | 8   |
| TCGA-C5-A1BQ | #####      | #####     | #####      | 2 | 2 | CESC | 19.84 | 1.0 | 667 | 128 |
| TCGA-VS-A9V3 | #####      | #####     | #####      | 2 | 2 | CESC | 17.74 | 0.0 | NA  | NA  |
| TCGA-EK-A3GN | #####      | #####     | #####      | 2 | 2 | CESC | 0.89  | 0.0 | 57  | 12  |
| TCGA-C5-A1MC | #####      | #####     | #####      | 2 | 2 | CESC | 33.87 | 0.0 | 93  | NA  |
| TCGA-IR-A3LI | #####      | #####     | #####      | 2 | 2 | CESC | 81.90 | 0.0 | 291 | 58  |
| TCGA-EK-A2RO | #####      | #####     | #####      | 2 | 2 | CESC | 0.07  | 0.0 | 112 | 12  |
| TCGA-C5-A907 | #####      | #####     | #####      | 2 | 2 | CESC | 14.72 | 0.0 | NA  | NA  |
| TCGA-EA-A5O9 | #####      | #####     | #####      | 2 | 2 | CESC | 25.89 | 0.0 | 51  | 10  |
| TCGA-JW-A5VK | #####      | #####     | #####      | 2 | 2 | CESC | 20.47 | 0.0 | 41  | 6   |
| TCGA-C5-A1MN | #####      | #####     | #####      | 2 | 2 | CESC | 40.90 | 1.0 | 133 | 23  |
| TCGA-FU-A3WE | #####      | #####     | #####      | 2 | 2 | CESC | 16.13 | 0.0 | 61  | 7   |
| TCGA-ZJ-AAXT | #####      | #####     | #####      | 2 | 2 | CESC | 0.00  | 0.0 | NA  | NA  |
| TCGA-LP-A5U2 | #####      | #####     | #####      | 2 | 2 | CESC | 0.30  | 0.0 | 196 | 35  |
| TCGA-LP-A7HU | #####      | #####     | #####      | 2 | 2 | CESC | 13.34 | 0.0 | 139 | 25  |
| TCGA-C5-A7CC | #####      | #####     | #####      | 2 | 2 | CESC | ####  | 0.0 | 96  | 18  |
| TCGA-PN-A8MA | #####      | #####     | #####      | 2 | 2 | CESC | 2.96  | 0.0 | NA  | NA  |
| TCGA-FU-A23K | #####      | #####     | #####      | 2 | 2 | CESC | 12.22 | 0.0 | 89  | 18  |
| TCGA-EK-A2PG | #####      | #####     | #####      | 2 | 2 | CESC | 1.51  | 0.0 | 493 | 41  |
| TCGA-MY-A5BC | #####      | #####     | #####      | 2 | 2 | CESC | 54.76 | 0.0 | 227 | 24  |
| TCGA-VS-A8QC | #####      | #####     | #####      | 2 | 2 | CESC | 11.50 | 1.0 | NA  | NA  |
| TCGA-EK-A2IP | #####      | #####     | #####      | 2 | 2 | CESC | 6.64  | 0.0 | 97  | 24  |
| TCGA-EK-A2RE | #####      | #####     | #####      | 2 | 2 | CESC | 1.87  | 0.0 | 19  | 2   |
| TCGA-C5-A8XI | #####      | #####     | #####      | 2 | 2 | CESC | 8.34  | 0.0 | NA  | NA  |
| TCGA-EK-A2RA | #####      | #NUM!     | #####      | 2 | 2 | CESC | 40.93 | 0.0 | 184 | 38  |
| TCGA-C5-A7CK | #####      | #####     | #####      | 2 | 2 | CESC | ####  | 1.0 | 121 | 21  |
| TCGA-VS-A8EG | #####      | #####     | #####      | 2 | 2 | CESC | 45.53 | 0.0 | NA  | NA  |
| TCGA-EK-A2IR | #####      | #####     | #####      | 2 | 2 | CESC | ####  | 0.0 | NA  | NA  |
| TCGA-FU-A3TX | #####      | #####     | #####      | 2 | 2 | CESC | 1.48  | 0.0 | 54  | 5   |
| TCGA-ZJ-AAXB | #####      | #####     | #####      | 2 | 2 | CESC | 0.00  | 0.0 | NA  | NA  |
| TCGA-VS-A957 | #####      | #####     | #####      | 2 | 2 | CESC | 55.45 | 0.0 | NA  | NA  |
| TCGA-VS-A9UD | #####      | #####     | #####      | 2 | 2 | CESC | 24.28 | 0.0 | NA  | NA  |



|              |        |        |        |   |   |      |       |     |      |     |
|--------------|--------|--------|--------|---|---|------|-------|-----|------|-----|
| TCGA-VS-A9UU | #####  | #####  | #####  | 2 | 2 | CESC | 14.52 | 0.0 | NA   | NA  |
| TCGA-VS-A9UI | #####  | #####  | #####  | 2 | 2 | CESC | 45.07 | 1.0 | NA   | NA  |
| TCGA-EK-A2PL | #####  | #####  | #####  | 2 | 2 | CESC | 0.43  | 0.0 | 162  | 41  |
| TCGA-ZJ-AAX4 | #####  | #####  | #####  | 2 | 2 | CESC | 0.69  | 0.0 | NA   | NA  |
| TCGA-C5-A7UE | #####  | #####  | #####  | 2 | 2 | CESC | ####  | 0.0 | 122  | 25  |
| TCGA-Q1-A73S | #####  | #####  | #####  | 2 | 2 | CESC | 22.60 | 0.0 | 36   | 4   |
| TCGA-VS-A954 | #####  | #####  | #####  | 2 | 2 | CESC | 56.31 | 0.0 | NA   | NA  |
| TCGA-MA-AA42 | #####  | #####  | #####  | 2 | 2 | CESC | 8.51  | 0.0 | NA   | NA  |
| TCGA-VS-A950 | #####  | #####  | #####  | 2 | 2 | CESC | 40.11 | 0.0 | NA   | NA  |
| TCGA-DS-A5RC | #####  | #####  | #####  | 2 | 2 | CESC | 16.82 | 0.0 | 92   | 14  |
| TCGA-VS-A9V2 | #####  | #####  | #####  | 2 | 2 | CESC | 18.23 | 0.0 | NA   | NA  |
| TCGA-MY-A5BF | #####  | #####  | #####  | 2 | 2 | CESC | 20.83 | 0.0 | 5    | 2   |
| TCGA-MA-AA3Z | #####  | #####  | #####  | 2 | 2 | CESC | 19.55 | 0.0 | NA   | NA  |
| TCGA-WL-A834 | #####  | #####  | #####  | 2 | 2 | CESC | 25.99 | 0.0 | 98   | 23  |
| TCGA-VS-A9UY | #####  | #####  | #####  | 2 | 2 | CESC | 18.23 | 1.0 | NA   | NA  |
| TCGA-EA-A97N | #####  | #####  | #####  | 2 | 2 | CESC | 0.36  | 0.0 | NA   | NA  |
| TCGA-C5-A7CM | #####  | #####  | #####  | 2 | 2 | CESC | 20.34 | 0.0 | 26   | 4   |
| TCGA-VS-A9UC | #####  | #####  | #####  | 2 | 2 | CESC | 27.10 | 0.0 | NA   | NA  |
| TCGA-MU-A8JV | #####  | #####  | #####  | 2 | 2 | CESC | 19.94 | 0.0 | NA   | NA  |
| TCGA-LP-A5U3 | #####  | #####  | #####  | 2 | 2 | CESC | 0.82  | 0.0 | 44   | 8   |
| TCGA-ZJ-A8QQ | #####  | #####  | #####  | 2 | 2 | CESC | 67.54 | 0.0 | NA   | NA  |
| TCGA-JW-AAVH | #####  | #####  | #####  | 2 | 2 | CESC | 18.13 | 0.0 | NA   | NA  |
| TCGA-EX-A69M | #####  | #####  | #####  | 2 | 2 | CESC | 8.31  | 1.0 | 47   | 5   |
| TCGA-VS-A8Q9 | #####  | #####  | #####  | 2 | 2 | CESC | 53.55 | 0.0 | NA   | NA  |
| TCGA-Q1-A73Q | #####  | #####  | #####  | 2 | 2 | CESC | 9.33  | 0.0 | 75   | NA  |
| TCGA-EA-A5FO | #####  | #####  | #####  | 2 | 2 | CESC | 26.77 | 0.0 | 67   | 16  |
| TCGA-VS-A953 | #####  | #####  | #####  | 2 | 2 | CESC | 15.67 | 1.0 | NA   | NA  |
| TCGA-EK-A2RB | #####  | #####  | #####  | 2 | 2 | CESC | 0.30  | 0.0 | 100  | 17  |
| TCGA-C5-A3HD | #####  | #NUM!  | #NUM!  | 2 | 2 | CESC | 51.97 | 0.0 | 102  | 20  |
| TCGA-C5-A3HL | #####  | #NUM!  | #NUM!  | 2 | 2 | CESC | 20.40 | 0.0 | 97   | 10  |
| TCGA-Q1-A5R3 | #####  | #NUM!  | #NUM!  | 2 | 2 | CESC | 15.93 | 0.0 | 57   | 8   |
| TCGA-JW-A5VG | #####  | #NUM!  | #NUM!  | 2 | 2 | CESC | 27.40 | 0.0 | 30   | 8   |
| TCGA-EK-A2RM | #####  | #NUM!  | #NUM!  | 2 | 2 | CESC | 1.64  | 0.0 | 2    | 1   |
| TCGA-Q1-A73O | #####  | #NUM!  | #NUM!  | 2 | 2 | CESC | 14.06 | 0.0 | 1283 | 299 |
| TCGA-EA-A44S | #####  | #NUM!  | #NUM!  | 2 | 2 | CESC | 12.12 | 0.0 | 41   | 12  |
| TCGA-EK-A2PI | #####  | #NUM!  | #NUM!  | 2 | 2 | CESC | 19.25 | 0.0 | 75   | 19  |
| TCGA-ZJ-AAXA | #####  | #####  | #NUM!  | 2 | 2 | CESC | 1.41  | 0.0 | NA   | NA  |
| TCGA-ZJ-AAXN | #####  | #####  | #NUM!  | 2 | 2 | CESC | 0.00  | 0.0 | NA   | NA  |
| TCGA-EK-A3GK | #####  | #####  | #NUM!  | 2 | 2 | CESC | 0.49  | 0.0 | 1095 | 221 |
| TCGA-C5-A2LZ | #####  | #####  | #NUM!  | 2 | 2 | CESC | ####  | 1.0 | 346  | 65  |
| TCGA-C5-A1BE | #####  | #####  | #NUM!  | 2 | 2 | CESC | 68.79 | 1.0 | 64   | 15  |
| TCGA-FU-A3HY | #####  | #####  | #NUM!  | 2 | 2 | CESC | 31.34 | 0.0 | 150  | 41  |
| TCGA-IR-A3LK | #####  | #####  | #NUM!  | 2 | 2 | CESC | 29.83 | 1.0 | 1149 | 261 |
| TCGA-EA-A3Y4 | #####  | #####  | #NUM!  | 2 | 2 | CESC | 36.86 | 0.0 | 110  | 23  |
| TCGA-EA-A6QX | #####  | #####  | #NUM!  | 2 | 2 | CESC | 23.98 | 0.0 | 70   | 7   |
| TCGA-VS-A8EC | #####  | #####  | #NUM!  | 2 | 2 | CESC | 46.48 | 0.0 | NA   | NA  |
| TCGA-EA-A1QT | #####  | #####  | #NUM!  | 2 | 2 | CESC | 40.83 | 0.0 | 63   | 12  |
| TCGA-Q1-A73R | #####  | #####  | #NUM!  | 2 | 2 | CESC | 18.63 | 0.0 | 57   | 6   |
| TCGA-IR-A3LC | #####  | #####  | #NUM!  | 2 | 2 | CESC | ####  | 0.0 | 43   | 10  |
| TCGA-EA-A3HS | #####  | #####  | #NUM!  | 2 | 2 | CESC | 31.50 | 0.0 | NA   | NA  |
| TCGA-IR-A3LL | #####  | #####  | #NUM!  | 2 | 2 | CESC | 36.33 | 0.0 | 321  | 83  |
| TCGA-MU-A5YI | #####  | #####  | #NUM!  | 2 | 2 | CESC | 34.59 | 0.0 | 100  | 24  |
| TCGA-28-5218 | 8.0769 | 6.4105 | 5.7411 | 2 | 2 | GBM  | 5     | 1.0 | 17   | 7   |
| TCGA-32-2634 | 7.8002 | 3.4620 | 5.2905 | 2 | 2 | GBM  | 23    | 0.0 | 38   | 5   |

|              |        |         |        |   |   |     |    |     |      |      |
|--------------|--------|---------|--------|---|---|-----|----|-----|------|------|
| TCGA-14-0789 | 7.6365 | 2.3373  | 5.2442 | 2 | 2 | GBM | 11 | 1.0 | 46   | 12   |
| TCGA-26-5139 | 7.5376 | 1.1807  | 5.2250 | 2 | 2 | GBM | 2  | 0.0 | 45   | 10   |
| TCGA-08-0386 | 7.1289 | 3.6248  | 5.0987 | 2 | 2 | GBM | 18 | 1.0 | 7    | 2    |
| TCGA-14-0736 | 7.6324 | 5.9803  | 4.9279 | 2 | 2 | GBM | 15 | 1.0 | #N/A | #N/A |
| TCGA-06-0750 | 7.5171 | 4.0329  | 4.9073 | 2 | 2 | GBM | 1  | 1.0 | 25   | 5    |
| TCGA-76-4929 | 7.1176 | 3.1592  | 4.7739 | 2 | 2 | GBM | 4  | 1.0 | 37   | 10   |
| TCGA-76-4925 | 7.4814 | -0.2221 | 4.6847 | 2 | 2 | GBM | 5  | 1.0 | 41   | 8    |
| TCGA-27-1832 | 7.1011 | 2.0231  | 4.3767 | 2 | 2 | GBM | 10 | 1.0 | 21   | 7    |
| TCGA-12-0821 | 8.0413 | 3.1681  | 4.2421 | 2 | 2 | GBM | 11 | 1.0 | 45   | 9    |
| TCGA-06-5418 | 7.3978 | 2.5742  | 4.1987 | 2 | 2 | GBM | 3  | 1.0 | 31   | 7    |
| TCGA-41-4097 | 7.8653 | 5.3730  | 4.0105 | 2 | 2 | GBM | 0  | 1.0 | 47   | 21   |
| TCGA-28-2513 | 7.6124 | 4.7788  | 4.0101 | 2 | 2 | GBM | 7  | 0.0 | 54   | 12   |
| TCGA-06-0878 | 7.5991 | 1.0839  | 3.9908 | 2 | 2 | GBM | 7  | 0.0 | 30   | 10   |
| TCGA-06-0646 | 7.5043 | 3.4644  | 3.7054 | 2 | 2 | GBM | 6  | 1.0 | 29   | 7    |
| TCGA-06-0649 | 7.6306 | 5.3736  | 3.6215 | 2 | 2 | GBM | 2  | 1.0 | 144  | 23   |
| TCGA-76-4926 | 7.3915 | 3.4982  | 3.4982 | 2 | 2 | GBM | 5  | 1.0 | 39   | 9    |
| TCGA-76-4927 | 7.2838 | 3.1433  | 3.4912 | 2 | 2 | GBM | 18 | 1.0 | 36   | 9    |
| TCGA-41-2572 | 7.3198 | 0.8722  | 3.4572 | 2 | 2 | GBM | 13 | 1.0 | 43   | 15   |
| TCGA-06-0645 | 7.6378 | 2.5236  | 3.1516 | 2 | 2 | GBM | 6  | 1.0 | 42   | 11   |
| TCGA-32-1982 | 7.6273 | 3.7569  | 3.0789 | 2 | 2 | GBM | 5  | 1.0 | 53   | 12   |
| TCGA-06-0644 | 7.5650 | 0.4782  | 3.0631 | 2 | 2 | GBM | 13 | 1.0 | 40   | 9    |
| TCGA-32-2632 | 7.2036 | 2.9518  | 3.0513 | 2 | 2 | GBM | 9  | 1.0 | 59   | 11   |
| TCGA-12-0618 | 7.1666 | 4.7179  | 3.0441 | 2 | 2 | GBM | 13 | 1.0 | 27   | 13   |
| TCGA-41-2571 | 7.1235 | 3.5578  | 3.0432 | 2 | 2 | GBM | 1  | 1.0 | 36   | 6    |
| TCGA-19-2625 | 7.7318 | 5.5738  | 2.8420 | 2 | 2 | GBM | 4  | 1.0 | 44   | 7    |
| TCGA-14-2554 | 7.0957 | 2.6480  | 2.7549 | 2 | 2 | GBM | 17 | 1.0 | 50   | 4    |
| TCGA-41-3915 | 7.4091 | 3.5678  | 2.7198 | 2 | 2 | GBM | 12 | 1.0 | 31   | 14   |
| TCGA-12-3652 | 7.1887 | 3.0626  | 2.6841 | 2 | 2 | GBM | 35 | 1.0 | 42   | 9    |
| TCGA-14-1034 | 7.7222 | 2.9942  | 2.5792 | 2 | 2 | GBM | 16 | 1.0 | 53   | 9    |
| TCGA-06-0745 | 7.7741 | 2.0850  | 2.5704 | 2 | 2 | GBM | 8  | 1.0 | 37   | 9    |
| TCGA-32-2615 | 7.2796 | 2.2484  | 2.4894 | 2 | 2 | GBM | 16 | 1.0 | 20   | 8    |
| TCGA-19-1389 | 8.0106 | 0.8577  | 2.2727 | 2 | 2 | GBM | 5  | 1.0 | #N/A | #N/A |
| TCGA-06-2559 | 7.2242 | 2.2394  | 2.2394 | 2 | 2 | GBM | 5  | 1.0 | 32   | 11   |
| TCGA-32-2638 | 7.2926 | 2.6529  | 2.1123 | 2 | 2 | GBM | 25 | 1.0 | 7    | 9    |
| TCGA-06-5414 | 7.3104 | 0.2350  | 2.1095 | 2 | 2 | GBM | 9  | 0.0 | 25   | 5    |
| TCGA-26-5134 | 7.8026 | 3.3570  | 2.0351 | 2 | 2 | GBM | 5  | 0.0 | 40   | 6    |
| TCGA-12-0619 | 7.4682 | 5.0569  | 1.8671 | 2 | 2 | GBM | 35 | 1.0 | 41   | 11   |
| TCGA-06-2558 | 7.1873 | 4.6292  | 1.8219 | 2 | 2 | GBM | 12 | 1.0 | 56   | 11   |
| TCGA-06-0749 | 7.2079 | 4.2735  | 1.7710 | 2 | 2 | GBM | 3  | 1.0 | 35   | 8    |
| TCGA-19-0957 | 7.3729 | 4.8799  | 1.7100 | 2 | 2 | GBM | 22 | 1.0 | #N/A | #N/A |
| TCGA-28-1753 | 7.9660 | 4.0069  | 1.6850 | 2 | 2 | GBM | 1  | 0.0 | 31   | 7    |
| TCGA-06-2564 | 7.5166 | 3.1377  | 1.6783 | 2 | 2 | GBM | 6  | 0.0 | 47   | 11   |
| TCGA-06-0743 | 7.6061 | 3.6075  | 1.6689 | 2 | 2 | GBM | 26 | 1.0 | 71   | 12   |
| TCGA-06-5412 | 7.5223 | 1.4058  | 1.6689 | 2 | 2 | GBM | 5  | 1.0 | 36   | 13   |
| TCGA-26-5132 | 7.4559 | 2.4128  | 1.5383 | 2 | 2 | GBM | 9  | 0.0 | 36   | 6    |
| TCGA-27-2524 | 7.4403 | 3.3478  | 1.2604 | 2 | 2 | GBM | 8  | 1.0 | 30   | 11   |
| TCGA-28-5208 | 7.4032 | 1.2598  | 1.2598 | 2 | 2 | GBM | 18 | 1.0 | 43   | 10   |
| TCGA-06-1804 | 7.9336 | 4.6367  | 1.2038 | 2 | 2 | GBM | 14 | 1.0 | 58   | 10   |
| TCGA-76-4928 | 7.3758 | 0.3946  | 1.1317 | 2 | 2 | GBM | 3  | 1.0 | 52   | 16   |
| TCGA-14-0787 | 7.5487 | -0.4626 | 1.1224 | 2 | 2 | GBM | 2  | 1.0 | 25   | 10   |
| TCGA-27-1830 | 7.1073 | 3.9658  | 1.0589 | 2 | 2 | GBM | 5  | 1.0 | 33   | 6    |
| TCGA-32-1970 | 7.4122 | 5.2179  | 0.9700 | 2 | 2 | GBM | 15 | 1.0 | 55   | 13   |
| TCGA-27-2528 | 7.3292 | 1.2508  | 0.9290 | 2 | 2 | GBM | 16 | 1.0 | 36   | 7    |
| TCGA-26-5135 | 7.2589 | 0.3400  | 0.9250 | 2 | 2 | GBM | 9  | 1.0 | 37   | 7    |

|              |         |         |          |   |   |      |       |     |      |      |
|--------------|---------|---------|----------|---|---|------|-------|-----|------|------|
| TCGA-06-2569 | 8.7187  | 2.0867  | 0.9168   | 2 | 2 | GBM  | 0     | 0.0 | 25   | 12   |
| TCGA-06-2562 | 7.6387  | 1.1629  | 0.8410   | 2 | 2 | GBM  | 13    | 1.0 | 43   | 10   |
| TCGA-06-2561 | 7.4714  | 0.1722  | 0.7571   | 2 | 2 | GBM  | 18    | 1.0 | 30   | 2    |
| TCGA-32-1980 | 7.1827  | 5.1516  | 0.6705   | 2 | 2 | GBM  | 1     | 1.0 | 10   | 2    |
| TCGA-15-0742 | 7.1060  | 1.3959  | 0.6589   | 2 | 2 | GBM  | 14    | 1.0 | 56   | 13   |
| TCGA-28-5209 | 7.0225  | #NUM!   | 0.4176   | 2 | 2 | GBM  | 15    | 0.0 | 62   | 14   |
| TCGA-28-2509 | 5.7578  | -0.9971 | 0.0029   | 2 | 2 | GBM  | 5     | 0.0 | 35   | 12   |
| TCGA-26-5133 | 4.4966  | -0.9954 | -0.9954  | 2 | 2 | GBM  | 15    | 0.0 | 23   | 12   |
| TCGA-06-5417 | 6.2543  | #NUM!   | #NUM!    | 2 | 2 | GBM  | 5     | 0.0 | 33   | 12   |
| TCGA-41-3392 | #NUM!   | #NUM!   | #NUM!    | 2 | 2 | GBM  | 1     | 1.0 | #N/A | #N/A |
| TCGA-12-1600 | #NUM!   | #NUM!   | #NUM!    | 2 | 2 | GBM  | 15    | 1.0 | #N/A | #N/A |
| TCGA-19-2621 | #NUM!   | #NUM!   | #NUM!    | 2 | 2 | GBM  | 1     | 1.0 | #N/A | #N/A |
| TCGA-19-5955 | #NUM!   | #NUM!   | #NUM!    | 2 | 2 | GBM  | 2     | 1.0 | #N/A | #N/A |
| TCGA-19-0960 | #NUM!   | #NUM!   | #NUM!    | 2 | 2 | GBM  | 9     | 0.0 | #N/A | #N/A |
| TCGA-19-1791 | #NUM!   | #NUM!   | #NUM!    | 2 | 2 | GBM  | 0     | 0.0 | #N/A | #N/A |
| TCGA-19-1387 | #NUM!   | #NUM!   | #NUM!    | 2 | 2 | GBM  | 6     | 0.0 | #N/A | #N/A |
| TCGA-27-2527 | #NUM!   | #NUM!   | #NUM!    | 2 | 2 | GBM  | 14    | 1.0 | #N/A | #N/A |
| TCGA-41-3393 | #NUM!   | #NUM!   | #NUM!    | 2 | 2 | GBM  | 4     | 1.0 | #N/A | #N/A |
| TCGA-06-A6S0 | #NUM!   | #NUM!   | #NUM!    | 2 | 2 | GBM  | 3     | 1.0 | #N/A | #N/A |
| TCGA-08-0352 | #NUM!   | #NUM!   | #NUM!    | 2 | 2 | GBM  | 1     | 1.0 | #N/A | #N/A |
| TCGA-06-0939 | #NUM!   | #NUM!   | #NUM!    | 2 | 2 | GBM  | 27    | 1.0 | #N/A | #N/A |
| TCGA-76-6193 | #NUM!   | #NUM!   | #NUM!    | 2 | 2 | GBM  | 3     | 1.0 | #N/A | #N/A |
| TCGA-28-1756 | #NUM!   | #NUM!   | #NUM!    | 2 | 2 | GBM  | 3     | 0.0 | #N/A | #N/A |
| TCGA-06-0877 | #NUM!   | #NUM!   | #NUM!    | 2 | 2 | GBM  | ####  | 1.0 | #N/A | #N/A |
| TCGA-14-0813 | #NUM!   | #NUM!   | #NUM!    | 2 | 2 | GBM  | 1     | 1.0 | #N/A | #N/A |
| TCGA-12-0615 | #NUM!   | #NUM!   | #NUM!    | 2 | 2 | GBM  | 15    | 1.0 | #N/A | #N/A |
| TCGA-06-A5U1 | #NUM!   | #NUM!   | #NUM!    | 2 | 2 | GBM  | 2     | 1.0 | #N/A | #N/A |
| TCGA-14-1396 | #NUM!   | #NUM!   | #NUM!    | 2 | 2 | GBM  | 1     | 1.0 | #N/A | #N/A |
| TCGA-06-0648 | #NUM!   | #NUM!   | #NUM!    | 2 | 2 | GBM  | 10    | 1.0 | #N/A | #N/A |
| TCGA-12-3651 | #NUM!   | #NUM!   | #NUM!    | 2 | 2 | GBM  | 13    | 1.0 | #N/A | #N/A |
| TCGA-74-6581 | #NUM!   | #NUM!   | #NUM!    | 2 | 2 | GBM  | 8     | 0.0 | #N/A | #N/A |
| TCGA-19-5959 | #NUM!   | #NUM!   | #NUM!    | 2 | 2 | GBM  | 17    | 1.0 | #N/A | #N/A |
| TCGA-28-1746 | #NUM!   | #NUM!   | #NUM!    | 2 | 2 | GBM  | 0     | 0.0 | #N/A | #N/A |
| TCGA-06-0413 | #NUM!   | #NUM!   | #NUM!    | 2 | 2 | GBM  | 3     | 1.0 | #N/A | #N/A |
| TCGA-19-0962 | #NUM!   | #NUM!   | #NUM!    | 2 | 2 | GBM  | 1     | 1.0 | #N/A | #N/A |
| TCGA-08-0360 | #NUM!   | #NUM!   | #NUM!    | 2 | 2 | GBM  | 15    | 1.0 | #N/A | #N/A |
| TCGA-B6-A0WX | 9.69091 | 5.34024 | 4.13183  | 2 | 2 | BRCA | 21.0  | 1   | 21   | 4    |
| TCGA-BH-A1EU | 9.24981 | 5.30414 | 3.69315  | 2 | 2 | BRCA | 42.2  | 1   | 13   | 4    |
| TCGA-BH-A1FB | 9.22253 | 4.58673 | 4.21705  | 2 | 2 | BRCA | 120.5 | 1   | NA   | NA   |
| TCGA-BH-A1F6 | 9.54224 | 4.54968 | 2.96645  | 2 | 2 | BRCA | 97.4  | 1   | 44   | 10   |
| TCGA-B6-A0IE | 8.95915 | 4.52156 | 3.33862  | 2 | 2 | BRCA | 65.5  | 1   | 26   | 4    |
| TCGA-AC-A2QJ | 9.84824 | 4.36187 | 4.21068  | 2 | 2 | BRCA | 14.6  | 1   | 50   | NA   |
| TCGA-BH-A1FH | 9.22435 | 4.17784 | 4.13277  | 2 | 2 | BRCA | 34.0  | 1   | 2    | 2    |
| TCGA-A2-A0EW | 9.02186 | 4.14635 | 4.15410  | 2 | 2 | BRCA | 61.9  | 1   | 11   | 4    |
| TCGA-HN-A2OE | 8.97006 | 3.48435 | 4.79316  | 2 | 2 | BRCA | 62.4  | 1   | 9    | NA   |
| TCGA-BH-A1FN | 8.52525 | 3.32344 | 0.39386  | 2 | 2 | BRCA | 72.0  | 1   | 83   | 17   |
| TCGA-A8-A08J | 8.28918 | 3.29399 | 1.82824  | 2 | 2 | BRCA | 37.0  | 1   | 27   | 7    |
| TCGA-D8-A1Y1 | 8.36771 | 3.25182 | 0.48326  | 2 | 2 | BRCA | 9.9   | 1   | 167  | 25   |
| TCGA-PE-A5DC | 7.37471 | 3.16070 | -0.01156 | 2 | 2 | BRCA | 47.0  | 1   | 80   | NA   |
| TCGA-AC-A3EH | 8.57141 | 3.05742 | 1.06325  | 2 | 2 | BRCA | 6.5   | 1   | 39   | NA   |
| TCGA-BH-A18R | 8.44878 | 3.02794 | #NUM!    | 2 | 2 | BRCA | 37.5  | 1   | 18   | 3    |
| TCGA-BH-A1ES | 7.68851 | 2.78621 | -2.13176 | 2 | 2 | BRCA | 113.7 | 1   | 16   | 2    |
| TCGA-B6-A0IC | 7.02566 | 2.78412 | 1.00418  | 2 | 2 | BRCA | 50.7  | 1   | 39   | 6    |
| TCGA-AC-A62V | 7.71980 | 2.75730 | -3.84934 | 2 | 2 | BRCA | 11.4  | 1   | NA   | NA   |

|              |          |          |          |   |   |      |       |   |      |    |
|--------------|----------|----------|----------|---|---|------|-------|---|------|----|
| TCGA-A2-A04V | 7.87375  | 2.69522  | -5.94875 | 2 | 2 | BRCA | 63.1  | 1 | 27   | 3  |
| TCGA-AO-A03P | 7.95697  | 2.67139  | -0.17005 | 2 | 2 | BRCA | 95.6  | 1 | 36   | 12 |
| TCGA-E9-A2JS | 7.51964  | 2.61884  | 1.80834  | 2 | 2 | BRCA | 29.7  | 1 | 50   | NA |
| TCGA-OL-A66K | 7.52746  | 2.60554  | 2.34215  | 2 | 2 | BRCA | 41.9  | 1 | 22   | NA |
| TCGA-B6-A0IM | 8.07514  | 2.59558  | 1.15502  | 2 | 2 | BRCA | 127.2 | 1 | 27   | 8  |
| TCGA-BH-A1F8 | 8.56648  | 2.55214  | -0.32240 | 2 | 2 | BRCA | 25.1  | 1 | 105  | 30 |
| TCGA-B6-A0X0 | 8.21927  | 2.46218  | 0.97705  | 2 | 2 | BRCA | 129.6 | 1 | 16   | 8  |
| TCGA-B6-A0RP | 8.16415  | 2.45569  | 1.97035  | 2 | 2 | BRCA | 102.7 | 1 | 17   | 6  |
| TCGA-A2-A0CU | 7.33801  | 2.31998  | 0.99791  | 2 | 2 | BRCA | 5.2   | 1 | 38   | 3  |
| TCGA-A2-A0SW | 8.38221  | 2.27569  | -4.59841 | 2 | 2 | BRCA | 44.8  | 1 | 42   | 9  |
| TCGA-E9-A226 | 8.23878  | 2.17233  | #NUM!    | 2 | 2 | BRCA | 34.4  | 1 | 22   | 8  |
| TCGA-B6-A0IG | 8.55778  | 2.11537  | #NUM!    | 2 | 2 | BRCA | 146.4 | 1 | 39   | NA |
| TCGA-E2-A2P5 | 7.92752  | 2.10155  | -6.11079 | 2 | 2 | BRCA | 27.0  | 1 | 67   | NA |
| TCGA-E2-A1B4 | 8.23885  | 2.08041  | 2.51691  | 2 | 2 | BRCA | 33.0  | 1 | 29   | 2  |
| TCGA-BH-A18P | 7.93729  | 2.03269  | 1.03455  | 2 | 2 | BRCA | 30.3  | 1 | 228  | 45 |
| TCGA-AR-A0TR | 8.35174  | 1.92991  | 1.18029  | 2 | 2 | BRCA | 5.3   | 1 | NA   | 12 |
| TCGA-BH-A1ET | 8.44579  | 1.78642  | 0.10110  | 2 | 2 | BRCA | 82.8  | 1 | 15   | 1  |
| TCGA-AR-A24L | 8.26196  | 1.75578  | 0.99785  | 2 | 2 | BRCA | 94.2  | 1 | 34   | 7  |
| TCGA-BH-A1FJ | 8.52306  | 1.59802  | #NUM!    | 2 | 2 | BRCA | 63.3  | 1 | 19   | 6  |
| TCGA-BH-A18S | 8.28144  | 1.57041  | #NUM!    | 2 | 2 | BRCA | 66.0  | 1 | 18   | 7  |
| TCGA-BH-A18U | 8.27881  | 1.51253  | -0.08478 | 2 | 2 | BRCA | 51.4  | 1 | 62   | 26 |
| TCGA-BH-A1F5 | 8.43066  | 1.45613  | -0.15131 | 2 | 2 | BRCA | 89.1  | 1 | 26   | 4  |
| TCGA-B6-A0I8 | 7.21216  | 1.43371  | #NUM!    | 2 | 2 | BRCA | 24.6  | 1 | 77   | 15 |
| TCGA-AC-A2FM | 7.30455  | 1.43165  | 2.44368  | 2 | 2 | BRCA | 26.0  | 1 | 33   | NA |
| TCGA-B6-A0WV | 7.05191  | 1.38233  | 1.94291  | 2 | 2 | BRCA | 79.4  | 1 | 23   | 4  |
| TCGA-C8-A3M7 | 8.06584  | 1.17689  | 1.60949  | 2 | 2 | BRCA | 34.0  | 1 | 115  | NA |
| TCGA-AC-A23H | 8.49239  | 0.79462  | #NUM!    | 2 | 2 | BRCA | 5.7   | 1 | 3573 | NA |
| TCGA-BH-A18J | 8.42843  | -0.02943 | -0.02937 | 2 | 2 | BRCA | 20.1  | 1 | 48   | 8  |
| TCGA-BH-A18K | 8.11957  | -0.17992 | -0.17979 | 2 | 2 | BRCA | 90.8  | 1 | 30   | 3  |
| TCGA-B6-A0RL | 7.41428  | -0.34086 | -0.34106 | 2 | 2 | BRCA | 81.1  | 1 | NA   | 3  |
| TCGA-GM-A2DE | 7.39292  | -2.59022 | 2.40397  | 2 | 2 | BRCA | 59.5  | 1 | 299  | NA |
| TCGA-B6-A0X5 | 7.58223  | -3.79086 | 2.40358  | 2 | 2 | BRCA | 68.9  | 1 | 22   | 11 |
| TCGA-A2-A3XU | 8.07664  | -4.14203 | 1.35152  | 2 | 2 | BRCA | 30.0  | 1 | 19   | NA |
| TCGA-B6-A0I6 | 7.01408  | -4.70915 | 1.24618  | 2 | 2 | BRCA | 32.6  | 1 | 78   | 12 |
| TCGA-A8-A08H | 9.84258  | 7.80951  | 3.97778  | 2 | 2 | BRCA | 0.0   | 0 | 46   | 13 |
| TCGA-AO-A1KC | 10.04777 | 7.14004  | 2.74663  | 2 | 2 | BRCA | 20.4  | 0 | 25   | 6  |
| TCGA-A8-A08I | 9.06472  | 7.06391  | 2.80801  | 2 | 2 | BRCA | 12.0  | 0 | 33   | 4  |
| TCGA-S3-AA15 | 9.44644  | 6.75573  | 5.96997  | 2 | 2 | BRCA | 17.2  | 0 | NA   | NA |
| TCGA-BH-A0HF | 8.89734  | 5.98458  | 4.39535  | 2 | 2 | BRCA | 23.9  | 0 | 588  | NA |
| TCGA-WT-AB41 | 8.82877  | 5.90346  | 5.92205  | 2 | 2 | BRCA | 52.9  | 0 | NA   | NA |
| TCGA-A8-A07O | 10.43663 | 5.89191  | 3.38864  | 2 | 2 | BRCA | 10.0  | 0 | 33   | 9  |
| TCGA-AR-A2LJ | 8.71074  | 5.86070  | 5.53461  | 2 | 2 | BRCA | 86.5  | 0 | 12   | NA |
| TCGA-BH-A28O | 9.81833  | 5.44913  | 5.18655  | 2 | 2 | BRCA | 36.8  | 0 | 12   | NA |
| TCGA-A2-A0EP | 9.56579  | 5.36144  | 3.92144  | 2 | 2 | BRCA | 118.4 | 0 | 3    | NA |
| TCGA-LL-A5YN | 9.34081  | 5.34294  | 4.37508  | 2 | 2 | BRCA | 14.7  | 0 | 23   | NA |
| TCGA-AC-A2FK | 9.22048  | 5.26596  | 4.10501  | 2 | 2 | BRCA | 87.1  | 0 | 1    | NA |
| TCGA-C8-A8HP | 9.05315  | 5.25405  | 2.57699  | 2 | 2 | BRCA | 13.0  | 0 | NA   | NA |
| TCGA-LL-A441 | 9.86489  | 5.16999  | 3.32301  | 2 | 2 | BRCA | 32.7  | 0 | 50   | NA |
| TCGA-A2-A0CR | 8.80554  | 5.13075  | 4.62640  | 2 | 2 | BRCA | 107.8 | 0 | 90   | NA |
| TCGA-A2-A3XT | 11.47899 | 5.11628  | 3.30946  | 2 | 2 | BRCA | 91.0  | 0 | 70   | NA |
| TCGA-AC-A2FB | 9.09518  | 5.09444  | 2.90312  | 2 | 2 | BRCA | 40.5  | 0 | 15   | NA |
| TCGA-A2-A0YK | 9.80059  | 5.08173  | 3.11722  | 2 | 2 | BRCA | 19.3  | 0 | 139  | 32 |
| TCGA-E2-A108 | 9.33966  | 4.99361  | 2.72384  | 2 | 2 | BRCA | 27.5  | 0 | 38   | 11 |
| TCGA-AR-A1AC | 9.83412  | 4.97092  | 3.08223  | 2 | 2 | BRCA | 86.0  | 0 | 5    | 1  |

|              |          |         |         |   |   |      |       |   |     |    |
|--------------|----------|---------|---------|---|---|------|-------|---|-----|----|
| TCGA-BH-A8FZ | 8.78713  | 4.89970 | 4.08050 | 2 | 2 | BRCA | 18.9  | 0 | NA  | NA |
| TCGA-LD-A74U | 8.70649  | 4.89398 | 4.29013 | 2 | 2 | BRCA | 13.2  | 0 | NA  | NA |
| TCGA-BH-A0BC | 8.98997  | 4.86870 | 2.67622 | 2 | 2 | BRCA | 74.1  | 0 | 28  | 4  |
| TCGA-BH-A0C0 | 9.12539  | 4.86134 | 3.72948 | 2 | 2 | BRCA | 41.7  | 0 | 118 | 13 |
| TCGA-LL-A5YO | 8.92904  | 4.80447 | 2.74316 | 2 | 2 | BRCA | 14.4  | 0 | 30  | NA |
| TCGA-A1-A0SB | 10.02409 | 4.77422 | 4.57231 | 2 | 2 | BRCA | 8.5   | 0 | 17  | 1  |
| TCGA-LL-A440 | 9.69839  | 4.70398 | 5.79000 | 2 | 2 | BRCA | 24.9  | 0 | 6   | NA |
| TCGA-AR-A24W | 8.91505  | 4.69274 | 3.05507 | 2 | 2 | BRCA | 50.9  | 0 | 6   | 2  |
| TCGA-EW-A1P1 | 9.32499  | 4.65039 | 4.08672 | 2 | 2 | BRCA | 39.8  | 0 | 2   | 0  |
| TCGA-AR-A2LQ | 10.21180 | 4.60828 | 3.86211 | 2 | 2 | BRCA | 40.5  | 0 | 5   | NA |
| TCGA-A7-A3IY | 8.98775  | 4.60672 | 4.55455 | 2 | 2 | BRCA | 11.3  | 0 | 12  | NA |
| TCGA-AR-A0TS | 9.44732  | 4.54380 | 2.85325 | 2 | 2 | BRCA | 84.0  | 0 | 33  | 10 |
| TCGA-A7-A5ZW | 9.00319  | 4.52738 | 4.65130 | 2 | 2 | BRCA | 10.7  | 0 | 24  | NA |
| TCGA-A2-A259 | 8.75714  | 4.41792 | 3.25135 | 2 | 2 | BRCA | 52.4  | 0 | 11  | 5  |
| TCGA-A7-A0CG | 8.96183  | 4.41741 | 2.61053 | 2 | 2 | BRCA | 34.3  | 0 | 28  | 6  |
| TCGA-AC-A6IV | 9.10747  | 4.37490 | 3.98825 | 2 | 2 | BRCA | 18.7  | 0 | NA  | NA |
| TCGA-AR-A5QN | 8.89778  | 4.34763 | 2.70036 | 2 | 2 | BRCA | 33.3  | 0 | 28  | NA |
| TCGA-A2-A04Q | 9.42189  | 4.32806 | 2.59121 | 2 | 2 | BRCA | 78.4  | 0 | 10  | 2  |
| TCGA-BH-A0B6 | 9.46237  | 4.32056 | 3.39839 | 2 | 2 | BRCA | 81.6  | 0 | 528 | NA |
| TCGA-AR-A1AK | 8.89836  | 4.25745 | 3.63776 | 2 | 2 | BRCA | 103.8 | 0 | 48  | 13 |
| TCGA-A2-A3XZ | 9.43837  | 4.24144 | 3.10564 | 2 | 2 | BRCA | 50.3  | 0 | 32  | NA |
| TCGA-LL-A5YP | 9.13178  | 4.23385 | 4.22211 | 2 | 2 | BRCA | 14.8  | 0 | 66  | NA |
| TCGA-A2-A0ES | 9.09232  | 4.22444 | 4.60830 | 2 | 2 | BRCA | 71.9  | 0 | 4   | 1  |
| TCGA-GM-A2DL | 8.96353  | 4.21532 | 2.54157 | 2 | 2 | BRCA | 75.0  | 0 | 36  | NA |
| TCGA-E9-A5FK | 9.05577  | 4.16658 | 4.42531 | 2 | 2 | BRCA | 26.7  | 0 | 13  | NA |
| TCGA-OL-A5S0 | 8.69826  | 4.16606 | 3.66812 | 2 | 2 | BRCA | 20.4  | 0 | 30  | NA |
| TCGA-AC-A5XS | 8.86466  | 4.09607 | 3.18625 | 2 | 2 | BRCA | 19.3  | 0 | 739 | NA |
| TCGA-OL-A66N | 9.04879  | 4.09193 | 4.25708 | 2 | 2 | BRCA | 26.0  | 0 | NA  | NA |
| TCGA-A2-A0YL | 8.99709  | 4.05141 | 3.05390 | 2 | 2 | BRCA | 48.4  | 0 | 8   | 6  |
| TCGA-C8-A132 | 8.71095  | 4.03002 | 3.52918 | 2 | 2 | BRCA | 12.6  | 0 | 38  | 8  |
| TCGA-AC-A8OC | 9.00373  | 3.98119 | 2.60582 | 2 | 2 | BRCA | 1.1   | 0 | NA  | NA |
| TCGA-BH-A5IZ | 9.47134  | 3.98112 | 2.60575 | 2 | 2 | BRCA | 18.6  | 0 | 102 | NA |
| TCGA-AC-A3YI | 8.94452  | 3.94952 | 3.93757 | 2 | 2 | BRCA | 23.2  | 0 | 12  | NA |
| TCGA-BH-A0BC | 8.72242  | 3.93252 | 2.65146 | 2 | 2 | BRCA | 72.2  | 0 | 38  | 4  |
| TCGA-EW-A1J6 | 8.72241  | 3.91511 | 3.00813 | 2 | 2 | BRCA | 28.8  | 0 | 28  | 6  |
| TCGA-BH-A0B0 | 8.81637  | 3.87941 | 2.65739 | 2 | 2 | BRCA | 81.4  | 0 | 37  | 8  |
| TCGA-A2-A0EN | 9.10372  | 3.85183 | 3.08981 | 2 | 2 | BRCA | 134.3 | 0 | 26  | 5  |
| TCGA-D8-A1JU | 8.82047  | 3.84275 | 4.57711 | 2 | 2 | BRCA | 14.7  | 0 | 7   | 1  |
| TCGA-C8-A134 | 9.93747  | 3.81741 | 3.30857 | 2 | 2 | BRCA | 12.6  | 0 | 75  | 15 |
| TCGA-B6-A400 | 9.73774  | 3.79958 | 7.21308 | 2 | 2 | BRCA | 7.1   | 0 | 94  | NA |
| TCGA-XX-A89A | 9.21401  | 3.79546 | 3.37397 | 2 | 2 | BRCA | 16.0  | 0 | NA  | NA |
| TCGA-AC-A3BB | 8.77724  | 3.78827 | 4.41192 | 2 | 2 | BRCA | 32.4  | 0 | 68  | NA |
| TCGA-AC-A8OF | 8.91510  | 3.77802 | 5.29079 | 2 | 2 | BRCA | 20.2  | 0 | NA  | NA |
| TCGA-BH-A0DV | 9.15446  | 3.74688 | 4.21967 | 2 | 2 | BRCA | 67.8  | 0 | 4   | 0  |
| TCGA-AC-A3WE | 9.08976  | 3.74079 | 3.03968 | 2 | 2 | BRCA | 16.6  | 0 | 101 | NA |
| TCGA-C8-A8HR | 9.17674  | 3.73030 | 5.02758 | 2 | 2 | BRCA | 13.4  | 0 | NA  | NA |
| TCGA-AR-A0TW | 8.91623  | 3.72802 | 3.13992 | 2 | 2 | BRCA | 98.8  | 0 | NA  | 11 |
| TCGA-BH-A0BD | 8.89283  | 3.70751 | 3.50777 | 2 | 2 | BRCA | 18.2  | 0 | 17  | 4  |
| TCGA-BH-A0DI | 8.86166  | 3.70659 | 2.70638 | 2 | 2 | BRCA | 30.0  | 0 | 22  | 5  |
| TCGA-E2-A1IO | 8.93257  | 3.69704 | 3.35235 | 2 | 2 | BRCA | 60.9  | 0 | 12  | 4  |
| TCGA-A8-A08P | 8.93524  | 3.68539 | 4.26418 | 2 | 2 | BRCA | 31.0  | 0 | 32  | 9  |
| TCGA-GM-A2DI | 9.63573  | 3.64885 | 2.64935 | 2 | 2 | BRCA | 85.1  | 0 | 20  | NA |
| TCGA-AC-A3WE | 9.04512  | 3.64503 | 4.86288 | 2 | 2 | BRCA | 19.8  | 0 | 158 | NA |
| TCGA-AO-A0J6 | 10.95914 | 3.63719 | 4.46595 | 2 | 2 | BRCA | 37.4  | 0 | 90  | 24 |

|              |         |         |           |   |   |      |       |   |      |      |
|--------------|---------|---------|-----------|---|---|------|-------|---|------|------|
| TCGA-XX-A899 | 9.04111 | 3.62685 | 4.32323   | 2 | 2 | BRCA | 15.3  | 0 | NA   | NA   |
| TCGA-AR-A251 | 9.67293 | 3.58075 | 3.01011   | 2 | 2 | BRCA | 99.5  | 0 | 123  | 34   |
| TCGA-AC-A8OS | 9.01777 | 3.56907 | 3.79224   | 2 | 2 | BRCA | 2.3   | 0 | NA   | NA   |
| TCGA-AO-A0JF | 9.00736 | 3.55238 | 4.17463   | 2 | 2 | BRCA | 65.0  | 0 | 22   | 7    |
| TCGA-AC-A2FF | 8.75586 | 3.52558 | 4.28431   | 2 | 2 | BRCA | 90.6  | 0 | 15   | NA   |
| TCGA-BH-A0AY | 8.75056 | 3.50582 | 3.98033   | 2 | 2 | BRCA | 25.5  | 0 | 80   | 9    |
| TCGA-LD-A9QF | 9.55670 | 3.49446 | 3.63017   | 2 | 2 | BRCA | 10.6  | 0 | NA   | NA   |
| TCGA-OL-A6VQ | 8.90281 | 3.45457 | 4.30356   | 2 | 2 | BRCA | 19.7  | 0 | #N/A | #N/A |
| TCGA-D8-A1JH | 8.73637 | 3.45047 | 2.53269   | 2 | 2 | BRCA | 14.0  | 0 | 16   | 3    |
| TCGA-BH-A0C3 | 8.83614 | 3.41505 | 3.99436   | 2 | 2 | BRCA | 89.0  | 0 | 11   | 2    |
| TCGA-D8-A145 | 8.79027 | 3.37461 | 3.61960   | 2 | 2 | BRCA | 13.5  | 0 | 19   | 5    |
| TCGA-OL-A5RY | 9.21778 | 3.37149 | 3.16577   | 2 | 2 | BRCA | 24.7  | 0 | 8    | NA   |
| TCGA-AC-A2FO | 8.79918 | 3.35878 | 3.22461   | 2 | 2 | BRCA | 74.1  | 0 | 18   | NA   |
| TCGA-A2-A0T1 | 9.45131 | 3.34967 | 3.19673   | 2 | 2 | BRCA | 17.1  | 0 | 23   | 6    |
| TCGA-BH-A0BV | 8.04775 | 3.33244 | -5.33643  | 2 | 2 | BRCA | 49.9  | 0 | 52   | 3    |
| TCGA-EW-A1IW | 8.55948 | 3.30219 | 1.03235   | 2 | 2 | BRCA | 12.2  | 0 | 59   | 6    |
| TCGA-A2-A3Y0 | 8.03050 | 3.30187 | 2.42709   | 2 | 2 | BRCA | 50.8  | 0 | 144  | NA   |
| TCGA-B6-A0WT | 8.18204 | 3.29476 | -3.01217  | 2 | 2 | BRCA | 188.5 | 0 | 14   | 5    |
| TCGA-BH-A0H7 | 8.11345 | 3.26932 | 1.52909   | 2 | 2 | BRCA | 23.1  | 0 | 64   | 9    |
| TCGA-A8-A08S | 8.50230 | 3.25336 | 0.76705   | 2 | 2 | BRCA | 33.0  | 0 | 42   | NA   |
| TCGA-AN-A0AJ | 8.37202 | 3.24560 | #NUM!     | 2 | 2 | BRCA | 10.0  | 0 | 59   | 14   |
| TCGA-B6-A0RN | 8.06102 | 3.24050 | 1.83541   | 2 | 2 | BRCA | 263.1 | 0 | 29   | 2    |
| TCGA-AN-A049 | 8.25891 | 3.22020 | 1.81441   | 2 | 2 | BRCA | 0.6   | 0 | 29   | 6    |
| TCGA-AR-A24O | 8.61652 | 3.21878 | 1.74962   | 2 | 2 | BRCA | 118.5 | 0 | 15   | 5    |
| TCGA-BH-A0B1 | 7.62379 | 3.21741 | -7.16049  | 2 | 2 | BRCA | 37.7  | 0 | 50   | 12   |
| TCGA-AR-A24P | 8.36581 | 3.20443 | 1.17311   | 2 | 2 | BRCA | 2.8   | 0 | 20   | 4    |
| TCGA-E2-A10B | 7.55204 | 3.20426 | 0.56442   | 2 | 2 | BRCA | 37.5  | 0 | 30   | NA   |
| TCGA-D8-A1Y0 | 8.47006 | 3.18506 | 2.44971   | 2 | 2 | BRCA | 15.5  | 0 | 48   | 13   |
| TCGA-C8-A1HI | 8.18363 | 3.17953 | 1.44973   | 2 | 2 | BRCA | 11.3  | 0 | 24   | 7    |
| TCGA-A8-A06P | 7.88589 | 3.17647 | 1.84968   | 2 | 2 | BRCA | 13.0  | 0 | 40   | 5    |
| TCGA-AO-A12G | 7.97388 | 3.16450 | 2.16682   | 2 | 2 | BRCA | 53.8  | 0 | 29   | NA   |
| TCGA-AN-A041 | 8.07296 | 3.16220 | -0.20372  | 2 | 2 | BRCA | 0.2   | 0 | 19   | 4    |
| TCGA-A2-A0EX | 8.41289 | 3.12654 | 1.34566   | 2 | 2 | BRCA | 24.7  | 0 | 27   | 6    |
| TCGA-A2-A0EO | 8.20038 | 3.11621 | #NUM!     | 2 | 2 | BRCA | 80.2  | 0 | 24   | 7    |
| TCGA-C8-A273 | 8.33556 | 3.11300 | 1.78370   | 2 | 2 | BRCA | 16.8  | 0 | 12   | 1    |
| TCGA-B6-A1KN | 8.63987 | 3.11298 | #NUM!     | 2 | 2 | BRCA | 139.1 | 0 | 46   | 11   |
| TCGA-C8-A12U | 7.89785 | 3.10681 | -4.41581  | 2 | 2 | BRCA | 12.6  | 0 | 31   | 12   |
| TCGA-S3-A6ZF | 8.35379 | 3.08844 | 0.73680   | 2 | 2 | BRCA | 18.8  | 0 | NA   | NA   |
| TCGA-A2-A1FX | 7.63984 | 3.07850 | -0.67321  | 2 | 2 | BRCA | 60.7  | 0 | 16   | 3    |
| TCGA-E2-A15H | 8.38132 | 3.06585 | -6.68780  | 2 | 2 | BRCA | 12.9  | 0 | 27   | 6    |
| TCGA-AR-A0TU | 7.95916 | 3.05997 | -0.13898  | 2 | 2 | BRCA | 23.3  | 0 | 60   | 16   |
| TCGA-BH-A0B5 | 7.99702 | 3.04963 | 1.71759   | 2 | 2 | BRCA | 70.2  | 0 | 51   | 10   |
| TCGA-AN-A0FS | 8.22755 | 3.04080 | 2.26162   | 2 | 2 | BRCA | 6.9   | 0 | 54   | 5    |
| TCGA-A2-A0T5 | 8.33358 | 3.03073 | 2.03128   | 2 | 2 | BRCA | 17.4  | 0 | 1079 | NA   |
| TCGA-AN-A0AK | 7.41759 | 3.01713 | -3.84415  | 2 | 2 | BRCA | 7.4   | 0 | 939  | NA   |
| TCGA-E2-A15D | 8.21760 | 3.01541 | 1.25665   | 2 | 2 | BRCA | 17.3  | 0 | 25   | 7    |
| TCGA-PE-A5DD | 8.68652 | 3.00869 | 0.24559   | 2 | 2 | BRCA | 64.2  | 0 | 43   | NA   |
| TCGA-E2-A14P | 7.77942 | 3.00826 | 2.20220   | 2 | 2 | BRCA | 40.9  | 0 | 52   | 9    |
| TCGA-AR-A24N | 7.92503 | 3.00465 | 1.99925   | 2 | 2 | BRCA | 99.7  | 0 | 26   | 8    |
| TCGA-BH-A0HX | 8.02128 | 3.00461 | -10.54355 | 2 | 2 | BRCA | 27.2  | 0 | 41   | 5    |
| TCGA-AC-A2BM | 8.18720 | 3.00357 | 2.41969   | 2 | 2 | BRCA | 99.3  | 0 | 16   | NA   |
| TCGA-A7-A6VV | 8.50610 | 3.00235 | -11.52218 | 2 | 2 | BRCA | 10.3  | 0 | NA   | NA   |
| TCGA-GM-A2DN | 8.49415 | 2.99019 | 0.22331   | 2 | 2 | BRCA | 106.0 | 0 | 18   | NA   |
| TCGA-BH-A201 | 8.61439 | 2.97812 | 0.61041   | 2 | 2 | BRCA | 28.1  | 0 | 14   | 2    |

|              |         |         |          |   |   |      |       |   |     |    |
|--------------|---------|---------|----------|---|---|------|-------|---|-----|----|
| TCGA-BH-A0AU | 7.92857 | 2.97324 | -5.32366 | 2 | 2 | BRCA | 62.9  | 0 | 14  | 2  |
| TCGA-E2-A14Q | 8.24103 | 2.97037 | 1.37301  | 2 | 2 | BRCA | 38.2  | 0 | 17  | 1  |
| TCGA-C8-A26W | 8.42118 | 2.96307 | 0.43079  | 2 | 2 | BRCA | 12.5  | 0 | 38  | 9  |
| TCGA-BH-A0DS | 8.11127 | 2.92757 | -4.21652 | 2 | 2 | BRCA | 2.6   | 0 | 25  | 9  |
| TCGA-E2-A154 | 7.21960 | 2.92181 | 0.40398  | 2 | 2 | BRCA | 19.4  | 0 | 33  | 7  |
| TCGA-AO-A0JJ | 8.61669 | 2.91698 | 0.90801  | 2 | 2 | BRCA | 62.0  | 0 | 13  | 4  |
| TCGA-D8-A1XZ | 7.93297 | 2.90731 | -0.54145 | 2 | 2 | BRCA | 15.3  | 0 | 49  | 6  |
| TCGA-A8-A07W | 6.90848 | 2.89392 | -0.13327 | 2 | 2 | BRCA | 10.0  | 0 | 59  | 10 |
| TCGA-A8-A09R | 8.65605 | 2.88002 | -0.37223 | 2 | 2 | BRCA | 9.0   | 0 | 41  | NA |
| TCGA-A2-A0EM | 7.47016 | 2.87912 | 0.08835  | 2 | 2 | BRCA | 101.6 | 0 | 27  | 1  |
| TCGA-AQ-A1H3 | 8.29084 | 2.86755 | 0.48229  | 2 | 2 | BRCA | 32.5  | 0 | 20  | 3  |
| TCGA-A8-A08X | 8.27910 | 2.86242 | -3.49362 | 2 | 2 | BRCA | 43.0  | 0 | 12  | 4  |
| TCGA-EW-A1PC | 8.17067 | 2.84806 | 1.84459  | 2 | 2 | BRCA | 13.9  | 0 | 60  | 14 |
| TCGA-AO-A0JG | 8.57798 | 2.84548 | 0.63449  | 2 | 2 | BRCA | 26.2  | 0 | NA  | 5  |
| TCGA-A1-A0SE | 7.79390 | 2.84011 | 0.82224  | 2 | 2 | BRCA | 43.4  | 0 | 18  | 6  |
| TCGA-EW-A1PF | 8.60435 | 2.81993 | -0.22764 | 2 | 2 | BRCA | 14.4  | 0 | NA  | NA |
| TCGA-S3-A6ZG | 7.06051 | 2.80958 | -0.46570 | 2 | 2 | BRCA | 18.5  | 0 | NA  | NA |
| TCGA-E2-A1LA | 8.25947 | 2.80339 | 1.23552  | 2 | 2 | BRCA | 24.6  | 0 | 64  | 13 |
| TCGA-A2-A25E | 8.06315 | 2.75509 | 0.72670  | 2 | 2 | BRCA | 105.3 | 0 | 47  | 15 |
| TCGA-EW-A1IZ | 8.58470 | 2.74599 | 2.47970  | 2 | 2 | BRCA | 18.2  | 0 | 235 | 51 |
| TCGA-BH-A0HY | 8.22303 | 2.73757 | -5.46244 | 2 | 2 | BRCA | 50.8  | 0 | 41  | 9  |
| TCGA-D8-A1JK | 8.43478 | 2.73117 | -3.94964 | 2 | 2 | BRCA | 20.1  | 0 | 132 | 22 |
| TCGA-D8-A143 | 8.38602 | 2.72915 | 0.17512  | 2 | 2 | BRCA | 14.2  | 0 | 38  | 4  |
| TCGA-E9-A24A | 8.11669 | 2.72275 | #NUM!    | 2 | 2 | BRCA | 24.5  | 0 | 19  | 3  |
| TCGA-E2-A1B0 | 8.03189 | 2.71657 | #NUM!    | 2 | 2 | BRCA | 53.6  | 0 | 27  | 9  |
| TCGA-A8-A0AD | 8.16786 | 2.71347 | 0.46312  | 2 | 2 | BRCA | 38.0  | 0 | 21  | 8  |
| TCGA-A7-A4SF | 7.15457 | 2.69771 | 1.72171  | 2 | 2 | BRCA | 17.9  | 0 | 51  | NA |
| TCGA-C8-A26Z | 7.84253 | 2.69682 | -0.38741 | 2 | 2 | BRCA | 15.4  | 0 | 36  | 7  |
| TCGA-A8-A09T | 7.76069 | 2.68305 | -2.30329 | 2 | 2 | BRCA | 19.0  | 0 | 21  | 2  |
| TCGA-BH-A0HI | 8.42856 | 2.68237 | 0.11869  | 2 | 2 | BRCA | 20.4  | 0 | 22  | 4  |
| TCGA-E2-A15K | 7.76213 | 2.67133 | 1.67398  | 2 | 2 | BRCA | 9.0   | 0 | 58  | 9  |
| TCGA-AO-A0J8 | 7.99123 | 2.66730 | -0.65888 | 2 | 2 | BRCA | 22.3  | 0 | 17  | 5  |
| TCGA-A7-A6VY | 7.99089 | 2.65774 | -0.18733 | 2 | 2 | BRCA | 8.7   | 0 | NA  | NA |
| TCGA-EW-A1J3 | 7.76570 | 2.64901 | #NUM!    | 2 | 2 | BRCA | 16.6  | 0 | 21  | 4  |
| TCGA-Z7-A8R6 | 7.46653 | 2.64468 | -6.85475 | 2 | 2 | BRCA | 107.0 | 0 | NA  | NA |
| TCGA-AR-A0U3 | 7.78908 | 2.64320 | 2.22147  | 2 | 2 | BRCA | 134.0 | 0 | 29  | 4  |
| TCGA-BH-A0BM | 8.53270 | 2.64251 | -3.22621 | 2 | 2 | BRCA | 61.6  | 0 | 51  | 3  |
| TCGA-AC-A5XU | 8.08890 | 2.63725 | 0.06392  | 2 | 2 | BRCA | 15.0  | 0 | 44  | NA |
| TCGA-A8-A07B | 7.98074 | 2.63000 | 1.15516  | 2 | 2 | BRCA | 43.0  | 0 | 52  | 13 |
| TCGA-D8-A1XV | 8.68680 | 2.61732 | 0.71083  | 2 | 2 | BRCA | 15.1  | 0 | 22  | 2  |
| TCGA-E9-A1RF | 8.49676 | 2.61293 | #NUM!    | 2 | 2 | BRCA | 6.6   | 0 | 102 | 29 |
| TCGA-E2-A153 | 8.35854 | 2.61051 | 0.70325  | 2 | 2 | BRCA | 23.2  | 0 | 35  | 1  |
| TCGA-AN-A0FW | 8.26524 | 2.60034 | 1.36783  | 2 | 2 | BRCA | 0.4   | 0 | 79  | 12 |
| TCGA-AR-A1AP | 7.93490 | 2.59055 | 1.85742  | 2 | 2 | BRCA | 93.8  | 0 | 30  | 6  |
| TCGA-B6-A40B | 8.27178 | 2.59013 | 1.35705  | 2 | 2 | BRCA | 103.6 | 0 | 43  | NA |
| TCGA-BH-A0HC | 8.09821 | 2.58778 | -4.63129 | 2 | 2 | BRCA | 36.8  | 0 | 26  | 9  |
| TCGA-EW-A423 | 7.59853 | 2.56930 | 0.73631  | 2 | 2 | BRCA | 17.5  | 0 | 39  | NA |
| TCGA-S3-AA0Z | 7.72027 | 2.56305 | #NUM!    | 2 | 2 | BRCA | 20.7  | 0 | NA  | NA |
| TCGA-BH-A0E7 | 7.41270 | 2.55851 | #NUM!    | 2 | 2 | BRCA | 44.8  | 0 | 41  | 5  |
| TCGA-AR-A1AV | 8.29096 | 2.55607 | 2.07126  | 2 | 2 | BRCA | 61.2  | 0 | 34  | 11 |
| TCGA-AN-A0FK | 8.63796 | 2.55383 | 1.24724  | 2 | 2 | BRCA | 7.0   | 0 | 33  | 7  |
| TCGA-E2-A10C | 7.67111 | 2.55334 | 0.27643  | 2 | 2 | BRCA | 40.1  | 0 | 267 | 59 |
| TCGA-E2-A15I | 7.89834 | 2.54997 | 2.06514  | 2 | 2 | BRCA | 55.6  | 0 | 131 | 3  |
| TCGA-E9-A54X | 7.49875 | 2.53994 | -3.51953 | 2 | 2 | BRCA | 23.9  | 0 | 24  | NA |

|              |         |         |          |   |   |      |       |   |      |    |
|--------------|---------|---------|----------|---|---|------|-------|---|------|----|
| TCGA-A8-A086 | 8.43527 | 2.51183 | 0.67184  | 2 | 2 | BRCA | 13.0  | 0 | 20   | 7  |
| TCGA-AO-A1KT | 7.62773 | 2.50919 | #NUM!    | 2 | 2 | BRCA | 17.8  | 0 | 27   | 6  |
| TCGA-E2-A1IU | 7.08362 | 2.49541 | 1.76137  | 2 | 2 | BRCA | 11.1  | 0 | 16   | 4  |
| TCGA-A8-A08O | 8.18290 | 2.47965 | 0.18930  | 2 | 2 | BRCA | 31.0  | 0 | 19   | 6  |
| TCGA-BH-A18H | 8.39865 | 2.47817 | 2.06021  | 2 | 2 | BRCA | 21.4  | 0 | 24   | 7  |
| TCGA-LL-A6FP | 7.09671 | 2.47208 | 1.73776  | 2 | 2 | BRCA | 22.2  | 0 | NA   | NA |
| TCGA-C8-A12M | 7.65137 | 2.46891 | 0.54430  | 2 | 2 | BRCA | 11.8  | 0 | 48   | 8  |
| TCGA-E2-A1L8 | 7.86801 | 2.45488 | 2.23790  | 2 | 2 | BRCA | 73.6  | 0 | 23   | 5  |
| TCGA-A8-A084 | 7.47075 | 2.45066 | 0.15480  | 2 | 2 | BRCA | 15.0  | 0 | 55   | NA |
| TCGA-A7-A26E | 7.57708 | 2.45053 | 0.37799  | 2 | 2 | BRCA | 31.3  | 0 | 272  | 5  |
| TCGA-AO-A03R | 8.46846 | 2.44655 | 1.86859  | 2 | 2 | BRCA | 68.7  | 0 | 31   | 5  |
| TCGA-E2-A1IG | 8.30929 | 2.44292 | 2.11967  | 2 | 2 | BRCA | 70.3  | 0 | 30   | 7  |
| TCGA-AR-A2LL | 7.79488 | 2.42356 | 1.83746  | 2 | 2 | BRCA | 66.1  | 0 | 26   | NA |
| TCGA-BH-A0DC | 8.61217 | 2.41150 | 2.40886  | 2 | 2 | BRCA | 3.2   | 0 | 45   | 7  |
| TCGA-BH-A28Q | 7.80614 | 2.40979 | 1.72433  | 2 | 2 | BRCA | 36.8  | 0 | 16   | 5  |
| TCGA-A8-A09Q | 8.55325 | 2.39027 | #NUM!    | 2 | 2 | BRCA | 25.0  | 0 | 75   | 29 |
| TCGA-D8-A1XS | 8.01588 | 2.39009 | 1.14444  | 2 | 2 | BRCA | 16.3  | 0 | 12   | 0  |
| TCGA-A7-A5ZV | 8.34563 | 2.38640 | 1.80938  | 2 | 2 | BRCA | 12.1  | 0 | 140  | NA |
| TCGA-AC-A2QI | 8.06971 | 2.37742 | -0.25877 | 2 | 2 | BRCA | 19.3  | 0 | 58   | NA |
| TCGA-BH-A0W4 | 8.06343 | 2.34615 | 1.75906  | 2 | 2 | BRCA | 24.9  | 0 | 27   | 7  |
| TCGA-E2-A107 | 6.80840 | 2.33671 | 0.01792  | 2 | 2 | BRCA | 34.4  | 0 | 21   | NA |
| TCGA-5T-A9QA | 8.20224 | 2.33246 | -3.00162 | 2 | 2 | BRCA | 10.0  | 0 | NA   | NA |
| TCGA-C8-A1HF | 8.42866 | 2.30916 | #NUM!    | 2 | 2 | BRCA | 10.9  | 0 | 21   | 4  |
| TCGA-A8-A07S | 7.63002 | 2.30727 | -0.01781 | 2 | 2 | BRCA | 8.0   | 0 | NA   | NA |
| TCGA-AN-A0XO | 8.31919 | 2.28463 | 1.69655  | 2 | 2 | BRCA | 12.3  | 0 | 21   | 6  |
| TCGA-A2-A0YG | 8.51692 | 2.28195 | 0.95696  | 2 | 2 | BRCA | 21.9  | 0 | 37   | 8  |
| TCGA-A8-A06O | 8.24856 | 2.27809 | 2.28582  | 2 | 2 | BRCA | 13.0  | 0 | 53   | 16 |
| TCGA-AN-A0FT | 7.53411 | 2.26545 | 0.31172  | 2 | 2 | BRCA | 7.0   | 0 | 69   | 6  |
| TCGA-GM-A3Ny | 8.07567 | 2.25041 | 2.48484  | 2 | 2 | BRCA | 38.2  | 0 | 57   | NA |
| TCGA-A8-A09E | 6.67404 | 2.22890 | 1.81389  | 2 | 2 | BRCA | 49.0  | 0 | 42   | NA |
| TCGA-A2-A0YE | 6.63715 | 2.22572 | -0.11752 | 2 | 2 | BRCA | 18.2  | 0 | 37   | NA |
| TCGA-E9-A1RC | 7.73584 | 2.19453 | 0.30946  | 2 | 2 | BRCA | 40.2  | 0 | 34   | 3  |
| TCGA-AC-A6NC | 7.50645 | 2.19134 | 0.85893  | 2 | 2 | BRCA | 1.7   | 0 | NA   | NA |
| TCGA-A8-A09Z | 8.24389 | 2.19037 | 0.22458  | 2 | 2 | BRCA | 0.0   | 0 | 1032 | NA |
| TCGA-A2-A0D3 | 7.55077 | 2.17764 | 1.85644  | 2 | 2 | BRCA | 61.5  | 0 | 19   | 5  |
| TCGA-EW-A1J1 | 8.61764 | 2.17704 | 1.58682  | 2 | 2 | BRCA | 18.9  | 0 | 14   | 6  |
| TCGA-AR-A250 | 8.25130 | 2.17313 | #NUM!    | 2 | 2 | BRCA | 88.9  | 0 | 51   | 10 |
| TCGA-C8-A278 | 8.64991 | 2.17156 | #NUM!    | 2 | 2 | BRCA | 9.8   | 0 | 25   | 9  |
| TCGA-BH-A0H6 | 7.97932 | 2.16365 | -5.39714 | 2 | 2 | BRCA | 24.5  | 0 | 12   | 4  |
| TCGA-BH-A0BA | 8.01210 | 2.13796 | 2.40812  | 2 | 2 | BRCA | 37.2  | 0 | 46   | 6  |
| TCGA-BH-A0HC | 8.20329 | 2.13438 | #NUM!    | 2 | 2 | BRCA | 2.5   | 0 | 16   | 2  |
| TCGA-E2-A1LG | 7.65428 | 2.11161 | #NUM!    | 2 | 2 | BRCA | 50.0  | 0 | 95   | 35 |
| TCGA-D8-A3Z6 | 7.73431 | 2.10638 | 1.36349  | 2 | 2 | BRCA | 18.5  | 0 | 24   | NA |
| TCGA-A2-A04R | 7.38430 | 2.10603 | -6.04644 | 2 | 2 | BRCA | 121.8 | 0 | 64   | 14 |
| TCGA-D8-A1JE | 8.44992 | 2.09981 | #NUM!    | 2 | 2 | BRCA | 18.9  | 0 | 28   | 5  |
| TCGA-A1-A0SD | 8.35835 | 2.09639 | #NUM!    | 2 | 2 | BRCA | 14.4  | 0 | 25   | 1  |
| TCGA-E2-A15O | 7.55934 | 2.08970 | 1.67498  | 2 | 2 | BRCA | 50.8  | 0 | 24   | 11 |
| TCGA-B6-A0WZ | 6.62780 | 2.04594 | 1.04854  | 2 | 2 | BRCA | 206.7 | 0 | 25   | 12 |
| TCGA-A2-A0CW | 8.56559 | 2.04319 | #NUM!    | 2 | 2 | BRCA | 107.8 | 0 | 49   | 9  |
| TCGA-A8-A0A2 | 7.33824 | 2.03995 | 1.44623  | 2 | 2 | BRCA | 19.0  | 0 | 23   | 5  |
| TCGA-BH-A0HE | 8.03853 | 2.01411 | 2.00266  | 2 | 2 | BRCA | 26.5  | 0 | 27   | 2  |
| TCGA-E9-A1R3 | 8.32543 | 1.99879 | 0.34680  | 2 | 2 | BRCA | 2.6   | 0 | 19   | 7  |
| TCGA-BH-A0WC | 7.00184 | 1.98957 | 0.46109  | 2 | 2 | BRCA | 23.9  | 0 | 12   | 4  |
| TCGA-A2-A1FW | 8.07207 | 1.98871 | 0.63724  | 2 | 2 | BRCA | 17.4  | 0 | 44   | 11 |



|              |         |         |          |   |   |      |       |   |     |    |
|--------------|---------|---------|----------|---|---|------|-------|---|-----|----|
| TCGA-BH-A0EI | 8.04144 | 1.98510 | 0.98422  | 2 | 2 | BRCA | 63.3  | 0 | 14  | 5  |
| TCGA-AR-A24K | 8.19317 | 1.98118 | 2.25660  | 2 | 2 | BRCA | 50.8  | 0 | 21  | 4  |
| TCGA-A2-A25B | 8.68727 | 1.95615 | -0.05251 | 2 | 2 | BRCA | 42.4  | 0 | 68  | 16 |
| TCGA-E9-A1RH | 7.70034 | 1.94120 | -0.07048 | 2 | 2 | BRCA | 46.6  | 0 | 63  | 12 |
| TCGA-AO-A1KC | 7.29588 | 1.90743 | 0.36906  | 2 | 2 | BRCA | 61.8  | 0 | NA  | NA |
| TCGA-E2-A14O | 7.02283 | 1.89161 | 1.88418  | 2 | 2 | BRCA | 44.6  | 0 | 33  | 6  |
| TCGA-EW-A1P0 | 7.50030 | 1.88121 | -4.52218 | 2 | 2 | BRCA | 41.1  | 0 | 22  | 4  |
| TCGA-BH-A0E0 | 8.25131 | 1.88116 | -2.77497 | 2 | 2 | BRCA | 4.4   | 0 | 50  | 8  |
| TCGA-PE-A5DE | 8.67782 | 1.86463 | 1.28663  | 2 | 2 | BRCA | 86.9  | 0 | 284 | NA |
| TCGA-E2-A14Y | 7.16233 | 1.83754 | -2.86596 | 2 | 2 | BRCA | 69.3  | 0 | 47  | 3  |
| TCGA-D8-A1JF | 7.73159 | 1.83666 | #NUM!    | 2 | 2 | BRCA | 12.0  | 0 | 36  | 6  |
| TCGA-BH-A0H9 | 7.43933 | 1.82563 | 0.27664  | 2 | 2 | BRCA | 41.0  | 0 | 59  | 4  |
| TCGA-B6-A0RI | 8.06088 | 1.82346 | #NUM!    | 2 | 2 | BRCA | 234.1 | 0 | 15  | 4  |
| TCGA-GI-A2C8 | 8.41189 | 1.80441 | 2.13419  | 2 | 2 | BRCA | 7.4   | 0 | 88  | NA |
| TCGA-E2-A10A | 8.05870 | 1.79504 | #NUM!    | 2 | 2 | BRCA | 40.4  | 0 | 16  | 4  |
| TCGA-C8-A1HC | 8.27136 | 1.78734 | 0.77338  | 2 | 2 | BRCA | 12.3  | 0 | 18  | 5  |
| TCGA-D8-A1X9 | 8.26354 | 1.78632 | #NUM!    | 2 | 2 | BRCA | 23.9  | 0 | 66  | 10 |
| TCGA-AN-A0XS | 8.18401 | 1.77420 | 1.35674  | 2 | 2 | BRCA | 0.3   | 0 | 24  | 5  |
| TCGA-AO-A12C | 8.46242 | 1.76399 | 1.76008  | 2 | 2 | BRCA | 77.9  | 0 | NA  | NA |
| TCGA-A2-A25C | 8.18894 | 1.75023 | 0.05868  | 2 | 2 | BRCA | 17.2  | 0 | 20  | 3  |
| TCGA-E2-A109 | 7.95675 | 1.74182 | -0.31394 | 2 | 2 | BRCA | 46.6  | 0 | 68  | NA |
| TCGA-E9-A1R2 | 7.64005 | 1.73872 | -5.52683 | 2 | 2 | BRCA | 34.9  | 0 | 43  | 6  |
| TCGA-D8-A1XF | 7.23526 | 1.72393 | -5.67890 | 2 | 2 | BRCA | 15.2  | 0 | 30  | 3  |
| TCGA-D8-A1XK | 8.11237 | 1.71002 | -0.35345 | 2 | 2 | BRCA | 14.5  | 0 | 719 | NA |
| TCGA-A8-A09K | 7.87208 | 1.69187 | 0.12381  | 2 | 2 | BRCA | 30.0  | 0 | 30  | NA |
| TCGA-E2-A10E | 7.57370 | 1.69129 | 0.66994  | 2 | 2 | BRCA | 28.4  | 0 | 21  | NA |
| TCGA-A2-A0YF | 7.87184 | 1.65416 | -0.42337 | 2 | 2 | BRCA | 50.4  | 0 | 15  | 4  |
| TCGA-AN-A0FV | 7.49088 | 1.64684 | -6.87663 | 2 | 2 | BRCA | 0.3   | 0 | 63  | 14 |
| TCGA-C8-A274 | 7.81902 | 1.63458 | -0.44804 | 2 | 2 | BRCA | 16.7  | 0 | 142 | 40 |
| TCGA-E2-A15J | 7.52065 | 1.59912 | 2.33515  | 2 | 2 | BRCA | 53.9  | 0 | 18  | 8  |
| TCGA-A1-A0SG | 7.70060 | 1.59280 | -9.88172 | 2 | 2 | BRCA | 14.3  | 0 | 26  | 4  |
| TCGA-A7-A0D9 | 7.80530 | 1.58269 | #NUM!    | 2 | 2 | BRCA | 37.4  | 0 | 40  | 8  |
| TCGA-D8-A1JN | 8.29568 | 1.57901 | -3.50390 | 2 | 2 | BRCA | 20.4  | 0 | 118 | 22 |
| TCGA-AO-A0J3 | 6.43690 | 1.56919 | 0.53744  | 2 | 2 | BRCA | 21.4  | 0 | 63  | 15 |
| TCGA-C8-A12Z | 8.27521 | 1.54922 | -3.59214 | 2 | 2 | BRCA | 12.6  | 0 | 38  | 11 |
| TCGA-C8-A1HE | 7.61952 | 1.53029 | 1.53777  | 2 | 2 | BRCA | 12.3  | 0 | 31  | 5  |
| TCGA-AN-A0FZ | 7.07871 | 1.51458 | 1.85423  | 2 | 2 | BRCA | 0.3   | 0 | 38  | 5  |
| TCGA-A8-A0A1 | 8.64367 | 1.47458 | -3.83341 | 2 | 2 | BRCA | 12.0  | 0 | 31  | 6  |
| TCGA-BH-A0B8 | 7.22973 | 1.43431 | 1.42616  | 2 | 2 | BRCA | 51.5  | 0 | 64  | 6  |
| TCGA-LL-A8F5 | 7.36627 | 1.40194 | 1.39463  | 2 | 2 | BRCA | 19.6  | 0 | NA  | NA |
| TCGA-A2-A0CQ | 6.96198 | 1.35410 | #NUM!    | 2 | 2 | BRCA | 88.5  | 0 | 27  | 8  |
| TCGA-BH-A0E1 | 8.36662 | 1.32953 | 2.30004  | 2 | 2 | BRCA | 15.7  | 0 | 47  | 4  |
| TCGA-E9-A1RE | 8.20150 | 1.29752 | #NUM!    | 2 | 2 | BRCA | 46.6  | 0 | 38  | 4  |
| TCGA-A2-A0ET | 6.48720 | 1.28733 | 0.69018  | 2 | 2 | BRCA | 35.0  | 0 | 25  | 5  |
| TCGA-AN-A0XR | 8.05058 | 1.25541 | -4.81644 | 2 | 2 | BRCA | 0.3   | 0 | 27  | 11 |
| TCGA-A1-A0SQ | 7.30801 | 1.23928 | 0.26404  | 2 | 2 | BRCA | 18.2  | 0 | 19  | 4  |
| TCGA-E2-A1BC | 8.27099 | 1.23614 | 1.21172  | 2 | 2 | BRCA | 16.5  | 0 | 45  | 6  |
| TCGA-D8-A1XD | 7.40439 | 1.22233 | -5.03032 | 2 | 2 | BRCA | 17.2  | 0 | NA  | NA |
| TCGA-A2-A0D4 | 6.57957 | 1.22004 | 2.24828  | 2 | 2 | BRCA | 25.2  | 0 | 27  | 5  |
| TCGA-AN-A0XT | 8.43443 | 1.17584 | -5.38745 | 2 | 2 | BRCA | 0.3   | 0 | 7   | 2  |
| TCGA-AQ-A1H2 | 7.68507 | 1.14621 | 2.40718  | 2 | 2 | BRCA | 15.6  | 0 | 24  | 6  |
| TCGA-AO-A0J7 | 6.75177 | 1.10709 | -6.13087 | 2 | 2 | BRCA | 20.3  | 0 | 22  | 1  |
| TCGA-D8-A27W | 8.10900 | 1.08013 | 1.51651  | 2 | 2 | BRCA | 12.2  | 0 | 18  | 4  |
| TCGA-E9-A249 | 7.68885 | 1.07890 | 0.47022  | 2 | 2 | BRCA | 7.1   | 0 | 10  | 2  |

|              |         |          |          |   |   |      |       |   |      |    |
|--------------|---------|----------|----------|---|---|------|-------|---|------|----|
| TCGA-E2-A15C | 7.94469 | 1.00928  | 1.00917  | 2 | 2 | BRCA | 22.8  | 0 | 21   | 7  |
| TCGA-A8-A07P | 7.85528 | 0.99689  | 1.58204  | 2 | 2 | BRCA | 11.0  | 0 | 40   | 8  |
| TCGA-A8-A0AB | 8.04794 | 0.99248  | 0.37827  | 2 | 2 | BRCA | 17.0  | 0 | 20   | 8  |
| TCGA-BH-A0DE | 8.50584 | 0.98409  | 1.98549  | 2 | 2 | BRCA | 77.9  | 0 | 43   | 7  |
| TCGA-A8-A097 | 8.04513 | 0.98052  | 0.36550  | 2 | 2 | BRCA | 12.0  | 0 | 96   | 15 |
| TCGA-E2-A1LL | 8.52933 | 0.96529  | 1.85993  | 2 | 2 | BRCA | 43.0  | 0 | 18   | 9  |
| TCGA-AN-A0FF | 8.25778 | 0.96278  | 1.54999  | 2 | 2 | BRCA | 5.6   | 0 | 23   | 6  |
| TCGA-AN-A046 | 8.00583 | 0.95547  | -0.04977 | 2 | 2 | BRCA | 0.3   | 0 | 4467 | NA |
| TCGA-A8-A079 | 7.25592 | 0.94478  | 0.94537  | 2 | 2 | BRCA | 9.0   | 0 | 40   | 7  |
| TCGA-D8-A1XJ | 8.60078 | 0.92118  | #NUM!    | 2 | 2 | BRCA | 21.8  | 0 | 59   | 15 |
| TCGA-A8-A06N | 5.85559 | 0.86706  | 0.24401  | 2 | 2 | BRCA | 0.0   | 0 | 25   | NA |
| TCGA-E2-A15L | 8.00967 | 0.83739  | 1.85172  | 2 | 2 | BRCA | 20.6  | 0 | 34   | 6  |
| TCGA-A8-A06R | 8.31643 | 0.81483  | #NUM!    | 2 | 2 | BRCA | 18.0  | 0 | 46   | 14 |
| TCGA-E9-A1R5 | 7.70443 | 0.80719  | 1.40370  | 2 | 2 | BRCA | 3.0   | 0 | 24   | 10 |
| TCGA-B6-A0RG | 6.60508 | 0.68921  | -3.36691 | 2 | 2 | BRCA | 68.4  | 0 | 51   | 19 |
| TCGA-AO-A1KP | 7.51266 | 0.62479  | #NUM!    | 2 | 2 | BRCA | 97.0  | 0 | 13   | 5  |
| TCGA-AR-A24X | 8.65032 | 0.62013  | -3.54759 | 2 | 2 | BRCA | 98.7  | 0 | 17   | 5  |
| TCGA-B6-A1KI | 7.28415 | 0.59508  | -0.46077 | 2 | 2 | BRCA | 73.5  | 0 | 15   | 1  |
| TCGA-A8-A09N | 8.61601 | 0.47196  | -4.00231 | 2 | 2 | BRCA | 1.0   | 0 | 55   | 12 |
| TCGA-A2-A3XV | 7.98961 | 0.46832  | 0.46476  | 2 | 2 | BRCA | 32.7  | 0 | 39   | NA |
| TCGA-AN-A0FY | 8.43863 | 0.41684  | -0.67020 | 2 | 2 | BRCA | 0.3   | 0 | 55   | 10 |
| TCGA-B6-A0IA | 5.44483 | 0.39324  | -4.29761 | 2 | 2 | BRCA | 275.7 | 0 | 43   | 1  |
| TCGA-D8-A1XR | 8.21146 | 0.38301  | 1.00488  | 2 | 2 | BRCA | 15.8  | 0 | 22   | 7  |
| TCGA-C8-A12W | 7.93348 | 0.33770  | 0.33567  | 2 | 2 | BRCA | 12.6  | 0 | 37   | 8  |
| TCGA-BH-A0DH | 7.26584 | 0.18664  | 1.16550  | 2 | 2 | BRCA | 38.0  | 0 | 47   | 6  |
| TCGA-A8-A091 | 7.24214 | 0.16708  | -0.97211 | 2 | 2 | BRCA | 33.0  | 0 | 21   | 5  |
| TCGA-E2-A106 | 6.62162 | 0.16489  | -5.64530 | 2 | 2 | BRCA | 83.5  | 0 | NA   | NA |
| TCGA-D8-A1XA | 8.04183 | 0.14923  | 2.12222  | 2 | 2 | BRCA | 27.6  | 0 | 21   | 6  |
| TCGA-AR-A1AN | 8.30870 | 0.01223  | 1.01081  | 2 | 2 | BRCA | 95.9  | 0 | 14   | 5  |
| TCGA-A7-A3IZ | 7.40128 | -0.09650 | 0.91485  | 2 | 2 | BRCA | 10.6  | 0 | 70   | NA |
| TCGA-E2-A14V | 7.91024 | -0.12398 | #NUM!    | 2 | 2 | BRCA | 34.2  | 0 | 60   | 16 |
| TCGA-A2-A0ER | 7.18132 | -0.15941 | 1.45164  | 2 | 2 | BRCA | 74.3  | 0 | 21   | 2  |
| TCGA-3C-AAAU | 8.38681 | -0.21463 | 0.81109  | 2 | 2 | BRCA | 133.0 | 0 | NA   | NA |
| TCGA-A2-A0T3 | 8.62856 | -0.21722 | -0.21714 | 2 | 2 | BRCA | 49.8  | 0 | 26   | 6  |
| TCGA-A8-A099 | 7.89488 | -0.24563 | 1.38010  | 2 | 2 | BRCA | 10.0  | 0 | 16   | 4  |
| TCGA-D8-A1X6 | 7.67441 | -0.44873 | 1.96936  | 2 | 2 | BRCA | 17.8  | 0 | 34   | 7  |
| TCGA-E9-A247 | 7.72002 | -0.54254 | 0.52663  | 2 | 2 | BRCA | 39.0  | 0 | 29   | 6  |
| TCGA-A2-A1FV | 7.21840 | -0.63285 | 0.44940  | 2 | 2 | BRCA | 23.5  | 0 | 32   | 5  |
| TCGA-B6-A0IQ | 8.14653 | -0.63897 | -0.64073 | 2 | 2 | BRCA | 140.8 | 0 | 48   | NA |
| TCGA-E2-A11E | 7.46219 | -0.67572 | -0.67775 | 2 | 2 | BRCA | 77.6  | 0 | 17   | 3  |
| TCGA-E9-A22H | 7.87831 | -0.68703 | #NUM!    | 2 | 2 | BRCA | 40.5  | 0 | 18   | 8  |
| TCGA-E2-A15R | 6.71464 | -0.71239 | 1.00159  | 2 | 2 | BRCA | 56.9  | 0 | 32   | 8  |
| TCGA-E9-A1RD | 8.26765 | -0.76060 | -0.76327 | 2 | 2 | BRCA | 1.1   | 0 | 18   | 5  |
| TCGA-3C-AALJ | 8.52576 | -1.94148 | -2.15791 | 2 | 2 | BRCA | 48.4  | 0 | NA   | NA |
| TCGA-AN-A03X | 7.87327 | -2.67881 | -2.86029 | 2 | 2 | BRCA | 0.3   | 0 | 36   | 10 |
| TCGA-C8-A137 | 6.37803 | -3.17293 | -3.33891 | 2 | 2 | BRCA | 12.4  | 0 | 34   | 11 |
| TCGA-LL-A5YM | 7.62827 | -3.19337 | 2.17383  | 2 | 2 | BRCA | 15.3  | 0 | 20   | NA |
| TCGA-LL-A6FQ | 7.11694 | -3.48536 | 2.48399  | 2 | 2 | BRCA | 2.6   | 0 | NA   | NA |
| TCGA-B6-A1KF | 7.76767 | -3.51589 | 2.07377  | 2 | 2 | BRCA | 101.4 | 0 | 40   | 11 |
| TCGA-AR-A1AS | 7.27396 | -3.69675 | 0.51320  | 2 | 2 | BRCA | 37.8  | 0 | 29   | 4  |
| TCGA-EW-A1Ox | 8.54450 | -3.97460 | -4.12381 | 2 | 2 | BRCA | 29.9  | 0 | 16   | 2  |
| TCGA-A2-A0CT | 7.41702 | -4.02139 | -4.16981 | 2 | 2 | BRCA | 75.2  | 0 | 61   | 20 |
| TCGA-AN-A0AS | 8.18801 | -4.15998 | 1.34764  | 2 | 2 | BRCA | 0.3   | 0 | 36   | 8  |
| TCGA-E9-A5UO | 8.41348 | -4.39168 | -4.53550 | 2 | 2 | BRCA | 25.8  | 0 | 29   | NA |

|              |            |           |            |   |   |      |      |   |     |    |
|--------------|------------|-----------|------------|---|---|------|------|---|-----|----|
| TCGA-D8-A1JS | 5.39210    | -5.00046  | 0.22894    | 2 | 2 | BRCA | 12.2 | 0 | 15  | 4  |
| TCGA-E2-A56Z | 7.39912    | -5.47907  | 1.14927    | 2 | 2 | BRCA | 8.3  | 0 | 45  | NA |
| TCGA-AO-A0JI | 8.60233    | -5.49590  | 1.14762    | 2 | 2 | BRCA | 50.2 | 0 | 14  | 2  |
| TCGA-A2-A0EU | 7.82033    | -6.68186  | 1.64835    | 2 | 2 | BRCA | 34.3 | 0 | 33  | 14 |
| TCGA-A7-A0CD | 8.42875    | #NUM!     | #NUM!      | 2 | 2 | BRCA | 38.3 | 0 | 27  | 7  |
| TCGA-D8-A1JD | 8.46399    | #NUM!     | #NUM!      | 2 | 2 | BRCA | 18.1 | 0 | 64  | 16 |
| TCGA-LL-A442 | 8.36584    | #NUM!     | -0.51808   | 2 | 2 | BRCA | 29.2 | 0 | NA  | NA |
| TCGA-AN-A0XU | 8.48078    | #NUM!     | -0.28930   | 2 | 2 | BRCA | 0.3  | 0 | 79  | 18 |
| TCGA-BH-A0HL | 7.52656    | #NUM!     | -0.22756   | 2 | 2 | BRCA | 2.4  | 0 | 30  | 8  |
| TCGA-KH-A6WC | 7.62183022 | 0.5529266 | -3.6990421 | 2 | 2 | ESCA | 6.27 | 0 | 26  | NA |
| TCGA-L5-A8NN | 10.9834843 | 2.5875238 | -0.2805306 | 2 | 2 | ESCA | 5.49 | 0 | 102 | NA |
| TCGA-L5-A4OU | 12.8794744 | 5.509404  | 4.9017259  | 2 | 2 | ESCA | 29   | 0 | 152 | NA |
| TCGA-L5-A43C | 13.1316124 | 4.4221333 | 3.0301295  | 2 | 2 | ESCA | 3.15 | 0 | 128 | NA |
| TCGA-L5-A8NG | 11.7921431 | 4.2206686 | 2.3367201  | 2 | 2 | ESCA | 35.9 | 0 | 121 | NA |
| TCGA-L5-A893 | 11.6436062 | 4.280637  | 4.5291466  | 2 | 2 | ESCA | 3.02 | 0 | 128 | NA |
| TCGA-L5-A8NT | 11.497493  | 3.930439  | 4.1542084  | 2 | 2 | ESCA | 27.1 | 0 | 95  | NA |
| TCGA-L5-A88W | 7.18058261 | 1.8961352 | -4.3891355 | 2 | 2 | ESCA | 25.1 | 1 | 136 | NA |
| TCGA-V5-A7RB | 10.4208314 | 0.7032008 | -0.3368692 | 2 | 2 | ESCA | 5.29 | 1 | 213 | NA |
| TCGA-L5-A4OW | 12.0475249 | 3.7106461 | 3.0026616  | 2 | 2 | ESCA | 7.13 | 1 | 246 | NA |
| TCGA-V5-A7RC | 7.48964652 | 1.9552686 | 0.5977628  | 2 | 2 | ESCA | 3.42 | 1 | 90  | NA |
| TCGA-VR-A8ER | 7.88710569 | 3.0860944 | -4.4621156 | 2 | 2 | ESCA | 12.4 | 1 | 54  | NA |
| TCGA-L5-A4OM | 8.87750367 | 2.2193949 | -0.4675318 | 2 | 2 | ESCA | 47.9 | 1 | 63  | NA |
| TCGA-L5-A43J | 8.54353932 | 1.502061  | #NUM!      | 2 | 2 | ESCA | 4.3  | 1 | 744 | NA |
| TCGA-L5-A4OS | 11.7913177 | 4.5639317 | 1.6797133  | 2 | 2 | ESCA | 58.5 | 0 | 84  | NA |
| TCGA-L5-A8NU | 11.7183049 | 4.8701497 | 4.8546002  | 2 | 2 | ESCA | 83.2 | 1 | 57  | NA |
| TCGA-2H-A9GC | 8.43313578 | #NUM!     | -0.0394969 | 2 | 2 | ESCA | 4.2  | 1 | 118 | NA |
| TCGA-JY-A939 | 11.8528676 | 3.6227459 | 2.4630604  | 2 | 2 | ESCA | 21.7 | 0 | 52  | NA |
| TCGA-2H-A9GL | 10.5603507 | 2.7684287 | #NUM!      | 2 | 2 | ESCA | 5.91 | 1 | 197 | NA |
| TCGA-V5-AASW | 13.3932517 | 4.1789965 | 0.8330225  | 2 | 2 | ESCA | 9.26 | 0 | 125 | NA |
| TCGA-2H-A9GF | 13.4725658 | 3.8534361 | 1.634995   | 2 | 2 | ESCA | 25.8 | 1 | 247 | NA |
| TCGA-L7-A56G | 8.27773336 | 2.4300967 | -5.9333907 | 2 | 2 | ESCA | 10.8 | 1 | 70  | NA |
| TCGA-IG-A8O2 | 8.43718207 | 2.1730837 | -0.184534  | 2 | 2 | ESCA | 4.66 | 1 | 122 | NA |
| TCGA-JY-A93E | 13.140058  | 3.6843326 | 2.8542475  | 2 | 2 | ESCA | 25.2 | 0 | 155 | NA |
| TCGA-R6-A8WC | 10.1423753 | 2.202406  | #NUM!      | 2 | 2 | ESCA | 12.7 | 1 | 99  | NA |
| TCGA-Z6-A8JE | 8.14725952 | 1.6424554 | -0.4420167 | 2 | 2 | ESCA | 2.1  | 0 | 183 | NA |
| TCGA-LN-A8HZ | 8.46357365 | #NUM!     | #NUM!      | 2 | 2 | ESCA | 12.3 | 0 | 100 | NA |
| TCGA-JY-A93D | 12.4959337 | 4.1919769 | 4.2665241  | 2 | 2 | ESCA | 31.5 | 1 | 100 | NA |
| TCGA-LN-A49O | 10.2158777 | 1.707293  | 0.142586   | 2 | 2 | ESCA | 13.4 | 0 | 60  | NA |
| TCGA-2H-A9GK | 12.3581606 | 4.2968984 | 3.873641   | 2 | 2 | ESCA | 7.62 | 1 | 157 | NA |
| TCGA-LN-A49Y | 8.39265325 | 2.9108352 | -4.2311449 | 2 | 2 | ESCA | 12.5 | 0 | 207 | NA |
| TCGA-LN-A9FR | 9.99003759 | 2.2327888 | #NUM!      | 2 | 2 | ESCA | 12.3 | 0 | 69  | NA |
| TCGA-VR-A8EX | 8.75728666 | 0.5895824 | 0.5836697  | 2 | 2 | ESCA | 28.1 | 1 | 120 | NA |
| TCGA-IC-A6RE | 12.1292145 | 4.2998203 | 5.8211069  | 2 | 2 | ESCA | 7.69 | 0 | 930 | NA |
| TCGA-IG-A97I | 7.70464238 | -0.404342 | -0.403484  | 2 | 2 | ESCA | 12.2 | 0 | 107 | NA |
| TCGA-VR-A8EW | 7.57836315 | 1.0452399 | -7.3499946 | 2 | 2 | ESCA | 8.11 | 1 | 106 | NA |
| TCGA-LN-A5U6 | 8.62825679 | 1.3217059 | -0.3139717 | 2 | 2 | ESCA | 12.3 | 0 | 101 | NA |
| TCGA-R6-A6Y0 | 10.3244804 | 1.784842  | -5.0740678 | 2 | 2 | ESCA | 53.9 | 0 | 156 | NA |
| TCGA-Z6-A9VB | 7.5911094  | 2.9311334 | -0.0875076 | 2 | 2 | ESCA | 1.31 | 0 | 86  | NA |
| TCGA-JY-A6FH | 10.9084574 | 1.8133568 | -0.2278161 | 2 | 2 | ESCA | 47.3 | 0 | 117 | NA |
| TCGA-LN-A4A8 | 10.8454553 | 2.0449892 | #NUM!      | 2 | 2 | ESCA | 15.5 | 0 | 106 | NA |
| TCGA-VR-AA4G | 9.30827009 | 1.2883547 | -0.3545284 | 2 | 2 | ESCA | 18   | 0 | 66  | NA |
| TCGA-JY-A6FA | 10.0684567 | -0.238116 | 0.7919302  | 2 | 2 | ESCA | 44.7 | 1 | 120 | NA |
| TCGA-IG-A3I8 | 8.55381834 | 0.5145836 | 0.5178193  | 2 | 2 | ESCA | 33.3 | 0 | 193 | NA |
| TCGA-JY-A6FG | 7.8580228  | -3.461716 | -3.5841122 | 2 | 2 | ESCA | 41.5 | 1 | 204 | NA |

|              |            |           |            |   |   |      |        |     |     |     |
|--------------|------------|-----------|------------|---|---|------|--------|-----|-----|-----|
| TCGA-VR-AA7I | 8.90742541 | 3.1552332 | #NUM!      | 2 | 2 | ESCA | 15.9   | 1   | NA  | NA  |
| TCGA-LN-A4A9 | 8.17610593 | 1.0246029 | -8.2372091 | 2 | 2 | ESCA | 11.5   | 1   | 190 | NA  |
| TCGA-IG-A6QS | 8.73719171 | 3.0710565 | 0.3248748  | 2 | 2 | ESCA | 9.95   | 1   | 63  | NA  |
| TCGA-JY-A6FD | 9.66002183 | 1.3225013 | 0.3561993  | 2 | 2 | ESCA | 68     | 0   | 123 | NA  |
| TCGA-S8-A6BW | 10.0786995 | 1.6992461 | -0.3701852 | 2 | 2 | ESCA | 20.4   | 0   | 93  | NA  |
| TCGA-XP-A8T8 | 6.75588776 | 0.1624336 | -5.627293  | 2 | 2 | ESCA | 14.4   | 0   | 94  | NA  |
| TCGA-LN-A5U7 | 8.92736802 | 1.5488771 | #NUM!      | 2 | 2 | ESCA | 25.2   | 0   | 108 | NA  |
| TCGA-VR-A8EY | 9.20752866 | 3.1929557 | -3.947956  | 2 | 2 | ESCA | 33.7   | 0   | 109 | NA  |
| TCGA-BA-A6DB | 7.17209643 | 3.0136588 | 0.2062681  | 2 | 2 | HNSC | 7.1    | 0.0 | NA  | NA  |
| TCGA-CR-7393 | 7.68432013 | 3.3049344 | 1.8899018  | 2 | 2 | HNSC | 99999  | 0.0 | 3   | 1   |
| TCGA-CV-7416 | 7.8982277  | 1.2461648 | 1.0237521  | 2 | 2 | HNSC | 25.07  | 1.0 | 65  | NA  |
| TCGA-MT-A51X | 5.48191565 | -1.009844 | #NUM!      | 2 | 2 | HNSC | 7.95   | 0.0 | NA  | NA  |
| TCGA-CV-7255 | 6.34030945 | -0.289122 | -1.8740845 | 2 | 2 | HNSC | 2.1    | 1.0 | 96  | 18  |
| TCGA-CV-7180 | 6.87749765 | 0.1910572 | #NUM!      | 2 | 2 | HNSC | 10.74  | 1.0 | 58  | 11  |
| TCGA-CR-7391 | 7.19314585 | 3.0380147 | -0.0494569 | 2 | 2 | HNSC | 29.99  | 0.0 | 11  | 2   |
| TCGA-CV-7440 | 8.9674603  | 3.0243906 | -0.367918  | 2 | 2 | HNSC | 22.17  | 1.0 | 192 | NA  |
| TCGA-CN-A6V7 | 6.20681707 | -1.507583 | #NUM!      | 2 | 2 | HNSC | 00000  | 0.0 | NA  | NA  |
| TCGA-CV-6945 | 6.92129112 | -0.20224  | #NUM!      | 2 | 2 | HNSC | 12.02  | 1.0 | 108 | 19  |
| TCGA-BA-5557 | 7.70164193 | 2.6516832 | 0.7447639  | 2 | 2 | HNSC | 20.47  | 0.0 | 38  | 6   |
| TCGA-CV-A468 | 7.16704275 | 1.7076131 | 1.7076131  | 2 | 2 | HNSC | 15.24  | 1.0 | NA  | NA  |
| TCGA-UF-A7JC | 6.27772816 | -0.477141 | #NUM!      | 2 | 2 | HNSC | 00000  | 1.0 | NA  | NA  |
| TCGA-IQ-A61O | 8.07022455 | 1.5218046 | 2.9002969  | 2 | 2 | HNSC | 13.83  | 1.0 | NA  | NA  |
| TCGA-BA-A6DD | 7.05722389 | 0.0404015 | -0.9595985 | 2 | 2 | HNSC | 5.68   | 1.0 | NA  | NA  |
| TCGA-CR-7371 | 7.68559891 | 2.9678326 | -0.4916728 | 2 | 2 | HNSC | 3.09   | 1.0 | 240 | 30  |
| TCGA-CV-A45R | 7.22979074 | 2.4042492 | 0.529771   | 2 | 2 | HNSC | 180.03 | 0.0 | NA  | NA  |
| TCGA-CR-6481 | 7.85642304 | 2.930056  | -0.5292809 | 2 | 2 | HNSC | 00000  | 0.0 | 426 | 100 |
| TCGA-F7-7848 | 7.83813302 | 3.3247386 | -0.4301201 | 2 | 2 | HNSC | 99999  | 0.0 | 265 | 34  |
| TCGA-CV-A45X | 5.86717494 | -0.831871 | #NUM!      | 2 | 2 | HNSC | 6.5    | 1.0 | NA  | NA  |
| TCGA-CV-A464 | 7.73645199 | 2.9817796 | 1.2162376  | 2 | 2 | HNSC | 56.57  | 0.0 | NA  | NA  |
| TCGA-P3-A6T3 | 6.99292701 | 0.1920679 | #NUM!      | 2 | 2 | HNSC | 18.96  | 1.0 | NA  | NA  |
| TCGA-CV-7433 | 7.78156233 | 3.5834709 | -0.3707133 | 2 | 2 | HNSC | 99999  | 1.0 | 98  | 26  |
| TCGA-BA-A6DG | 7.46512802 | 3.605601  | -0.0383026 | 2 | 2 | HNSC | 2.27   | 1.0 | NA  | NA  |
| TCGA-CR-7382 | 8.82410432 | 3.5024834 | -0.0825301 | 2 | 2 | HNSC | 26.15  | 0.0 | 76  | 16  |
| TCGA-CN-6022 | 8.51520348 | 3.6545043 | 0.1519887  | 2 | 2 | HNSC | 9.23   | 1.0 | 59  | 11  |
| TCGA-CR-6487 | 7.80421364 | 2.1940555 | -0.5063527 | 2 | 2 | HNSC | 7.69   | 0.0 | 118 | 25  |
| TCGA-HD-8634 | 6.59004655 | -0.755356 | #NUM!      | 2 | 2 | HNSC | 12.65  | 1.0 | NA  | NA  |
| TCGA-TN-A7HJ | 7.16481644 | 2.399007  | 0.399007   | 2 | 2 | HNSC | 13.24  | 0.0 | NA  | NA  |
| TCGA-MZ-A7D7 | 6.42487675 | #NUM!     | #NUM!      | 2 | 2 | HNSC | 17.97  | 0.0 | NA  | NA  |
| TCGA-CR-6474 | 7.75508586 | 5.0987438 | 2.0987564  | 2 | 2 | HNSC | 18.53  | 1.0 | 98  | 27  |
| TCGA-T3-A92M | 7.3979826  | 2.954066  | 0.4515408  | 2 | 2 | HNSC | 13.7   | 0.0 | NA  | NA  |
| TCGA-CR-7367 | 7.63430792 | 2.3419004 | 0.0199154  | 2 | 2 | HNSC | 47.31  | 0.0 | 153 | 37  |
| TCGA-CV-7097 | 7.16983383 | 2.6836515 | 0.1811662  | 2 | 2 | HNSC | 12.65  | 1.0 | 76  | 13  |
| TCGA-CV-7183 | 6.19616636 | -0.768813 | #NUM!      | 2 | 2 | HNSC | 130.78 | 0.0 | 64  | 10  |
| TCGA-KU-A66T | 5.87601345 | #NUM!     | #NUM!      | 2 | 2 | HNSC | 18.13  | 0.0 | NA  | NA  |
| TCGA-CR-7404 | 7.14422384 | 1.6621143 | 0.9251639  | 2 | 2 | HNSC | 48.36  | 0.0 | 111 | 14  |
| TCGA-MZ-A5BI | 7.65734132 | 2.9126499 | 0.690283   | 2 | 2 | HNSC | 7.13   | 1.0 | NA  | NA  |
| TCGA-CV-6933 | 7.42000735 | 2.5941663 | -0.653809  | 2 | 2 | HNSC | 90.05  | 1.0 | 103 | 19  |
| TCGA-P3-A6T8 | 8.0262346  | 2.6929628 | -0.8919105 | 2 | 2 | HNSC | 13.14  | 0.0 | NA  | NA  |
| TCGA-H7-8501 | 8.89463772 | 3.1400588 | 0.9176991  | 2 | 2 | HNSC | 15.14  | 0.0 | NA  | NA  |
| TCGA-BA-5555 | 7.79191498 | 1.6919808 | -0.6299473 | 2 | 2 | HNSC | 99999  | 0.0 | 126 | 16  |
| TCGA-F7-A61V | 6.42371934 | -0.898081 | #NUM!      | 2 | 2 | HNSC | 24.93  | 0.0 | NA  | NA  |
| TCGA-UF-A71D | 5.84727037 | #NUM!     | #NUM!      | 2 | 2 | HNSC | 48     | 0.0 | NA  | NA  |
| TCGA-D6-6827 | 8.62435865 | 2.9272328 | 1.0527637  | 2 | 2 | HNSC | 18.66  | 0.0 | NA  | 2   |
| TCGA-KU-A6H7 | 6.74383403 | #NUM!     | #NUM!      | 2 | 2 | HNSC | 19.25  | 0.0 | NA  | NA  |

|              |            |           |            |   |   |      |        |     |     |    |
|--------------|------------|-----------|------------|---|---|------|--------|-----|-----|----|
| TCGA-CN-6017 | 7.95028702 | 5.1836771 | -0.7936068 | 2 | 2 | HNSC | 28.02  | 1.0 | 9   | 2  |
| TCGA-CV-7430 | 6.89373352 | -1.540778 | #NUM!      | 2 | 2 | HNSC | 00000  | 1.0 | 85  | 10 |
| TCGA-BB-7861 | 8.05436826 | 2.6003887 | -0.0626556 | 2 | 2 | HNSC | 22.4   | 0.0 | NA  | NA |
| TCGA-QK-A6V9 | 6.92799716 | -0.416385 | #NUM!      | 2 | 2 | HNSC | 27.37  | 0.0 | NA  | NA |
| TCGA-CN-5356 | 7.98755963 | 3.4316497 | -0.070815  | 2 | 2 | HNSC | 46.29  | 0.0 | 306 | 25 |
| TCGA-CX-A4AQ | 8.870656   | 4.1305932 | 0.6712028  | 2 | 2 | HNSC | 51.08  | 0.0 | NA  | NA |
| TCGA-CN-4727 | 7.4518334  | 1.5250666 | 0.5250666  | 2 | 2 | HNSC | 51.25  | 0.0 | 351 | NA |
| TCGA-D6-A6EQ | 8.01237704 | 2.5447821 | 1.5447821  | 2 | 2 | HNSC | 12.09  | 0.0 | NA  | NA |
| TCGA-H7-A76A | 7.99615766 | 3.6147334 | 1.6887175  | 2 | 2 | HNSC | 20.93  | 0.0 | NA  | NA |
| TCGA-CV-A45O | 4.62971798 | #NUM!     | #NUM!      | 2 | 2 | HNSC | 27.96  | 0.0 | NA  | NA |
| TCGA-CN-6011 | 6.89579459 | 0.1828194 | #NUM!      | 2 | 2 | HNSC | 30.65  | 0.0 | 299 | 54 |
| TCGA-CQ-A4CF | 7.59549098 | 0.6978628 | 0.2827363  | 2 | 2 | HNSC | 12.45  | 1.0 | NA  | NA |
| TCGA-RS-A6TP | 5.80894616 | -0.764886 | -1.7651308 | 2 | 2 | HNSC | 16.95  | 0.0 | NA  | NA |
| TCGA-CN-6996 | 7.48619064 | 2.6926281 | 1.2520523  | 2 | 2 | HNSC | 17.41  | 1.0 | NA  | 9  |
| TCGA-HD-8314 | 7.2391832  | 3.5509991 | 1.8989435  | 2 | 2 | HNSC | 22.01  | 0.0 | NA  | NA |
| TCGA-BA-5556 | 7.49228584 | 1.2398257 | -0.5674681 | 2 | 2 | HNSC | 23.82  | 0.0 | 127 | 31 |
| TCGA-DQ-7593 | 8.10619283 | 2.0329119 | 1.7433857  | 2 | 2 | HNSC | 40.21  | 0.0 | NA  | NA |
| TCGA-CR-7377 | 7.44829888 | 2.4857102 | 0.0706641  | 2 | 2 | HNSC | 9.17   | 1.0 | 105 | 17 |
| TCGA-CN-5359 | 7.51126166 | 2.5371967 | -0.0478156 | 2 | 2 | HNSC | 12.39  | 1.0 | 130 | 28 |
| TCGA-CN-A6V1 | 7.52403311 | 2.0744712 | -0.7328837 | 2 | 2 | HNSC | 99999  | 0.0 | NA  | NA |
| TCGA-BA-A6DL | 8.40448465 | 1.4134316 | 1.1504297  | 2 | 2 | HNSC | 20.47  | 0.0 | NA  | NA |
| TCGA-CQ-A4CE | 8.57259526 | 3.0380147 | 2.1204847  | 2 | 2 | HNSC | 29.34  | 0.0 | NA  | NA |
| TCGA-CQ-7063 | 6.89280993 | -0.785626 | #NUM!      | 2 | 2 | HNSC | 99999  | 0.0 | NA  | NA |
| TCGA-CV-5971 | 7.7002892  | 5.3381213 | 2.9230921  | 2 | 2 | HNSC | 23.03  | 0.0 | 22  | 4  |
| TCGA-CV-7422 | 7.35940872 | 1.3804524 | -0.6194922 | 2 | 2 | HNSC | 34.07  | 1.0 | 117 | 18 |
| TCGA-CR-7399 | 8.19003057 | 2.3103983 | 0.544881   | 2 | 2 | HNSC | 5.95   | 0.0 | 244 | 28 |
| TCGA-CN-A63T | 7.41261303 | 4.4410518 | 0.8864331  | 2 | 2 | HNSC | 7.39   | 0.0 | NA  | NA |
| TCGA-QK-AA3K | 8.67188635 | 2.304511  | -0.5028731 | 2 | 2 | HNSC | 8.31   | 0.0 | NA  | NA |
| TCGA-CN-5358 | 8.15104344 | 3.4677751 | 2.3523066  | 2 | 2 | HNSC | 8.57   | 1.0 | 51  | 8  |
| TCGA-CV-6441 | 7.07369386 | 2.2573124 | -0.202074  | 2 | 2 | HNSC | 9.59   | 1.0 | 191 | 29 |
| TCGA-IQ-A6SG | 7.15434422 | 1.3070787 | -0.5002179 | 2 | 2 | HNSC | 19.02  | 0.0 | NA  | NA |
| TCGA-D6-6824 | 8.18606916 | 2.9460758 | 1.4866114  | 2 | 2 | HNSC | 99999  | 0.0 | 60  | 10 |
| TCGA-HD-8635 | 7.44194736 | 2.7124417 | 0.8379432  | 2 | 2 | HNSC | 22.83  | 0.0 | NA  | NA |
| TCGA-CN-6019 | 7.57444215 | 2.757322  | -0.9431391 | 2 | 2 | HNSC | 34.1   | 0.0 | 118 | 11 |
| TCGA-BB-7864 | 6.69448744 | -1.444969 | #NUM!      | 2 | 2 | HNSC | 50.16  | 0.0 | NA  | NA |
| TCGA-CN-4733 | 7.88294501 | 2.6825284 | 2.1519887  | 2 | 2 | HNSC | 52.1   | 0.0 | 33  | 8  |
| TCGA-CV-A45Y | 7.34964482 | 1.4627329 | 1.4627329  | 2 | 2 | HNSC | 88.8   | 1.0 | NA  | NA |
| TCGA-CR-6482 | 8.27210393 | 3.16739   | 1.2928995  | 2 | 2 | HNSC | 11.33  | 0.0 | 39  | 9  |
| TCGA-D6-A6EP | 9.70026769 | 3.8414599 | -0.8590905 | 2 | 2 | HNSC | 13.93  | 0.0 | NA  | NA |
| TCGA-CV-5439 | 5.39286005 | -0.205896 | #NUM!      | 2 | 2 | HNSC | 00000  | 1.0 | 88  | 15 |
| TCGA-DQ-7591 | 8.31937497 | 1.8290377 | 0.6066317  | 2 | 2 | HNSC | 20.43  | 0.0 | 33  | 10 |
| TCGA-D6-8568 | 8.38459857 | 1.3902274 | 1.7121555  | 2 | 2 | HNSC | 24.93  | 0.0 | NA  | NA |
| TCGA-CN-4730 | 9.03354056 | 1.3297551 | -0.25515   | 2 | 2 | HNSC | 26.84  | 0.0 | 152 | 30 |
| TCGA-CV-7248 | 7.64282141 | 2.8092498 | -0.6501818 | 2 | 2 | HNSC | 17.12  | 1.0 | 241 | 35 |
| TCGA-CQ-A4CE | 7.04674642 | -0.082072 | #NUM!      | 2 | 2 | HNSC | 44.45  | 0.0 | NA  | NA |
| TCGA-CV-5443 | 8.87882158 | 2.5645733 | 0.8275752  | 2 | 2 | HNSC | 91.46  | 0.0 | 45  | 15 |
| TCGA-CV-A45T | 7.97932916 | 2.6713387 | 0.5558162  | 2 | 2 | HNSC | 159.53 | 1.0 | NA  | NA |
| TCGA-CN-6989 | 7.93267008 | 1.5348585 | 1.3649646  | 2 | 2 | HNSC | 32.19  | 1.0 | 92  | 20 |
| TCGA-CN-5355 | 7.92330787 | 2.3507801 | 0.2353594  | 2 | 2 | HNSC | 41.98  | 0.0 | 94  | 15 |
| TCGA-CN-6016 | 7.36884952 | 3.6907747 | -0.9531597 | 2 | 2 | HNSC | 47.4   | 0.0 | 102 | 23 |
| TCGA-CV-7411 | 6.2874058  | -0.912401 | #NUM!      | 2 | 2 | HNSC | 89.26  | 1.0 | 103 | 15 |
| TCGA-CV-5436 | 6.53514938 | -0.988504 | #NUM!      | 2 | 2 | HNSC | 00000  | 1.0 | 98  | 23 |
| TCGA-QK-A6IH | 6.229982   | -0.724278 | #NUM!      | 2 | 2 | HNSC | 21.45  | 0.0 | NA  | NA |
| TCGA-CQ-5325 | 7.75675445 | 2.3203403 | 2.9053124  | 2 | 2 | HNSC | 21.48  | 1.0 | 48  | 11 |

|              |            |           |            |   |   |      |        |     |     |     |
|--------------|------------|-----------|------------|---|---|------|--------|-----|-----|-----|
| TCGA-BB-A5HZ | 6.85964908 | 0.0908534 | #NUM!      | 2 | 2 | HNSC | 27.17  | 0.0 | NA  | NA  |
| TCGA-BA-5558 | 7.17356022 | 1.2827956 | 0.2827363  | 2 | 2 | HNSC | 00000  | 0.0 | 123 | 18  |
| TCGA-D6-A6EM | 7.13378235 | 2.4708232 | 0.8858867  | 2 | 2 | HNSC | 7.62   | 0.0 | NA  | NA  |
| TCGA-CV-6934 | 8.04345661 | 3.5383271 | 0.7310094  | 2 | 2 | HNSC | 2.14   | 1.0 | 82  | 17  |
| TCGA-CN-6997 | 6.80802974 | -0.227692 | -1.8124856 | 2 | 2 | HNSC | 32.46  | 1.0 | 129 | 24  |
| TCGA-CQ-5326 | 7.44048135 | 3.2028878 | -0.3206663 | 2 | 2 | HNSC | 2.92   | 1.0 | 178 | 35  |
| TCGA-CN-A49C | 6.04449904 | #NUM!     | #NUM!      | 2 | 2 | HNSC | 21.19  | 0.0 | NA  | NA  |
| TCGA-CV-7407 | 6.89240196 | -0.434013 | #NUM!      | 2 | 2 | HNSC | 35.51  | 1.0 | 105 | 15  |
| TCGA-CR-7390 | 8.08519252 | 1.4211021 | 0.1987456  | 2 | 2 | HNSC | 49.54  | 0.0 | 105 | 23  |
| TCGA-CV-6935 | 6.27237038 | -0.297431 | #NUM!      | 2 | 2 | HNSC | 9.69   | 1.0 | 195 | 31  |
| TCGA-CR-6488 | 7.46144343 | 2.9189205 | 0.8485578  | 2 | 2 | HNSC | 12.45  | 0.0 | 32  | 1   |
| TCGA-CV-5432 | 6.07153315 | #NUM!     | #NUM!      | 2 | 2 | HNSC | 10000  | 0.0 | 220 | 31  |
| TCGA-UF-A7JJ | 7.70329038 | 3.1998922 | 1.499476   | 2 | 2 | HNSC | 18.04  | 0.0 | NA  | NA  |
| TCGA-CR-7402 | 7.69949472 | 4.222735  | -0.2798091 | 2 | 2 | HNSC | 29.93  | 0.0 | 811 | 104 |
| TCGA-BB-4217 | 8.07746466 | 1.772688  | -0.3972581 | 2 | 2 | HNSC | 6.14   | 0.0 | 23  | 6   |
| TCGA-WA-A7H4 | 7.93011164 | 3.7678455 | 0.6804144  | 2 | 2 | HNSC | 14.55  | 0.0 | NA  | NA  |
| TCGA-QK-AA3J | 7.91419316 | 1.9780492 | 1.9780492  | 2 | 2 | HNSC | 15.31  | 0.0 | NA  | NA  |
| TCGA-CQ-A4CC | 9.25134251 | 1.3740657 | 1.3740657  | 2 | 2 | HNSC | 33.57  | 0.0 | NA  | NA  |
| TCGA-CQ-5330 | 8.18944358 | 3.7055246 | -0.8180706 | 2 | 2 | HNSC | 62.32  | 0.0 | 58  | 12  |
| TCGA-BB-8596 | 8.08882321 | 4.3959265 | 1.9809027  | 2 | 2 | HNSC | 99999  | 0.0 | NA  | NA  |
| TCGA-CV-7238 | 7.22526336 | 2.8683312 | 1.0203422  | 2 | 2 | HNSC | 89.59  | 0.0 | 59  | 7   |
| TCGA-UF-A7JD | 9.44714647 | 3.8667003 | 1.1297446  | 2 | 2 | HNSC | 24.28  | 1.0 | NA  | NA  |
| TCGA-BA-5559 | 8.56351014 | 3.8779209 | -0.8224011 | 2 | 2 | HNSC | 00000  | 1.0 | 71  | 9   |
| TCGA-CV-6942 | 7.15291452 | 2.7891032 | 1.7891032  | 2 | 2 | HNSC | 69999  | 0.0 | 195 | 31  |
| TCGA-CV-7427 | 6.53106169 | #NUM!     | #NUM!      | 2 | 2 | HNSC | 156.37 | 1.0 | 384 | 69  |
| TCGA-CV-5431 | 8.91545248 | 0.6772602 | 0.6772602  | 2 | 2 | HNSC | 99999  | 1.0 | 71  | NA  |
| TCGA-CV-6955 | 5.45677002 | #NUM!     | #NUM!      | 2 | 2 | HNSC | 10.97  | 1.0 | 110 | 19  |
| TCGA-MT-A7BN | 7.43703544 | 2.7369728 | 2.1519887  | 2 | 2 | HNSC | 15.41  | 0.0 | NA  | NA  |
| TCGA-HD-7831 | 8.31843525 | 1.529721  | -0.7921071 | 2 | 2 | HNSC | 21.91  | 0.0 | 32  | 8   |
| TCGA-F7-A622 | 7.58207272 | 2.0149622 | -0.792357  | 2 | 2 | HNSC | 11.79  | 1.0 | NA  | NA  |
| TCGA-H7-7774 | 5.57346542 | #NUM!     | #NUM!      | 2 | 2 | HNSC | 13.37  | 0.0 | 136 | 28  |
| TCGA-BA-6871 | 7.88342898 | 2.8866477 | 0.6849982  | 2 | 2 | HNSC | 3.55   | 1.0 | 122 | 20  |
| TCGA-UF-A7J9 | 7.519479   | 2.9867932 | -0.3351531 | 2 | 2 | HNSC | 44.61  | 0.0 | NA  | NA  |
| TCGA-CV-A45W | 7.16399276 | 1.6279336 | 0.3060289  | 2 | 2 | HNSC | 45.93  | 1.0 | NA  | NA  |
| TCGA-CV-7102 | 7.34040738 | 4.1715191 | 0.679694   | 2 | 2 | HNSC | 1.84   | 1.0 | 126 | 27  |
| TCGA-CQ-7071 | 6.58844331 | 0.2133784 | #NUM!      | 2 | 2 | HNSC | 43.07  | 0.0 | NA  | NA  |
| TCGA-CX-7085 | 7.98523514 | 3.469925  | 0.8849495  | 2 | 2 | HNSC | 10.55  | 0.0 | 139 | 28  |
| TCGA-CQ-6227 | 7.28261031 | 2.9959729 | 0.3520805  | 2 | 2 | HNSC | 4.24   | 1.0 | 35  | 6   |
| TCGA-CN-5370 | 8.11622698 | 6.8377869 | 4.64139    | 2 | 2 | HNSC | 8.51   | 1.0 | 91  | 17  |
| TCGA-CR-7383 | 7.32570211 | 2.7012163 | 0.1162317  | 2 | 2 | HNSC | 17.12  | 1.0 | 91  | 14  |
| TCGA-CN-4740 | 7.50476894 | 3.514299  | 1.6073895  | 2 | 2 | HNSC | 27.56  | 1.0 | 131 | 26  |
| TCGA-T3-A92N | 6.31060006 | -0.878056 | #NUM!      | 2 | 2 | HNSC | 3.12   | 1.0 | NA  | NA  |
| TCGA-CV-7432 | 6.73056796 | -0.378007 | -1.3778193 | 2 | 2 | HNSC | 84.43  | 1.0 | 134 | 17  |
| TCGA-CV-A463 | 5.178384   | -0.843992 | #NUM!      | 2 | 2 | HNSC | 0.76   | 1.0 | NA  | NA  |
| TCGA-CV-7177 | 7.44171253 | 1.4992208 | -0.5008302 | 2 | 2 | HNSC | 21.78  | 1.0 | 98  | 13  |
| TCGA-CR-7376 | 8.32241447 | 3.7797325 | 1.1947805  | 2 | 2 | HNSC | 31.93  | 0.0 | 59  | 5   |
| TCGA-BB-8601 | 6.88991397 | #NUM!     | #NUM!      | 2 | 2 | HNSC | 20.5   | 0.0 | NA  | NA  |
| TCGA-CN-6018 | 8.69399251 | 2.9345731 | -0.1529652 | 2 | 2 | HNSC | 19.05  | 1.0 | 89  | 11  |
| TCGA-CQ-5334 | 8.36028921 | 1.9159797 | 1.9159797  | 2 | 2 | HNSC | 4.24   | 1.0 | 162 | 38  |
| TCGA-CN-5369 | 7.63453011 | 3.327946  | 1.0649518  | 2 | 2 | HNSC | 12.48  | 1.0 | 497 | 108 |
| TCGA-E1-5304 | 6.4216     | #NUM!     | #NUM!      | 2 | 2 | LGG  | 41.10  | 1   | 26  | NA  |
| TCGA-HT-7606 | 6.5086     | #NUM!     | #NUM!      | 2 | 2 | LGG  | 17.28  | 0   | 21  | 8   |
| TCGA-DU-7306 | 7.0358     | #NUM!     | #NUM!      | 2 | 2 | LGG  | 41.95  | 0   | 43  | NA  |
| TCGA-HW-7491 | 4.5716     | -1.7859   | #NUM!      | 2 | 2 | LGG  | 68.27  | 0   | 12  | 6   |

|              |        |         |         |   |   |     |       |   |    |    |
|--------------|--------|---------|---------|---|---|-----|-------|---|----|----|
| TCGA-HT-8013 | 6.4835 | -1.7288 | -1.7288 | 2 | 2 | LGG | 63.50 | 1 | 24 | 7  |
| TCGA-HT-7604 | 6.4396 | -1.6100 | #NUM!   | 2 | 2 | LGG | ####  | 0 | 36 | NA |
| TCGA-TM-A84I | 6.9155 | -1.3607 | #NUM!   | 2 | 2 | LGG | 28.06 | 0 | NA | NA |
| TCGA-P5-A5F6 | 4.8870 | -0.7276 | #NUM!   | 2 | 2 | LGG | 1.28  | 0 | 0  | 2  |
| TCGA-HT-7468 | 5.0218 | -0.6364 | #NUM!   | 2 | 2 | LGG | 6.67  | 0 | 13 | 3  |
| TCGA-HT-7485 | 5.5581 | -0.4530 | #NUM!   | 2 | 2 | LGG | 4.01  | 0 | 12 | 5  |
| TCGA-HT-7469 | 4.3995 | -0.0336 | -1.6184 | 2 | 2 | LGG | 11.53 | 1 | 24 | 10 |
| TCGA-DU-7301 | 6.8908 | 0.0578  | -1.5270 | 2 | 2 | LGG | 25.89 | 1 | 23 | 10 |
| TCGA-HT-8108 | 6.2080 | 0.1675  | #NUM!   | 2 | 2 | LGG | 2.50  | 0 | 15 | 5  |
| TCGA-DU-A5TS | 6.0519 | 0.3105  | #NUM!   | 2 | 2 | LGG | 31.67 | 0 | 29 | NA |
| TCGA-TQ-A7RN | 5.0640 | 0.3316  | -1.6684 | 2 | 2 | LGG | 33.71 | 0 | NA | NA |
| TCGA-DH-A7UU | 6.8578 | 0.3827  | #NUM!   | 2 | 2 | LGG | 13.70 | 0 | NA | NA |
| TCGA-TM-A84H | 6.3680 | 0.5369  | #NUM!   | 2 | 2 | LGG | 30.42 | 0 | NA | NA |
| TCGA-HT-7609 | 7.0992 | 0.6382  | #NUM!   | 2 | 2 | LGG | 45.96 | 0 | 20 | 12 |
| TCGA-HT-7879 | 7.4337 | 0.7293  | 1.7293  | 2 | 2 | LGG | 3.68  | 0 | 15 | 5  |
| TCGA-DU-6396 | 8.1402 | 0.7404  | 1.2258  | 2 | 2 | LGG | 75.10 | 1 | 31 | 10 |
| TCGA-TM-A84C | 7.9530 | 0.8039  | 0.0670  | 2 | 2 | LGG | 16.16 | 1 | NA | NA |
| TCGA-S9-A6TV | 7.7805 | 0.8345  | 3.2037  | 2 | 2 | LGG | 18.76 | 0 | NA | NA |
| TCGA-S9-A6U8 | 7.9505 | 0.8360  | 0.0990  | 2 | 2 | LGG | 98.16 | 1 | NA | NA |
| TCGA-E1-A7YD | 7.3284 | 0.8455  | 1.6529  | 2 | 2 | LGG | 14.29 | 1 | NA | NA |
| TCGA-DH-A66D | 7.4694 | 0.9479  | 0.6259  | 2 | 2 | LGG | 27.79 | 0 | NA | NA |
| TCGA-QH-A6CV | 7.4668 | 0.9590  | 0.2221  | 2 | 2 | LGG | 14.52 | 0 | NA | NA |
| TCGA-FG-8188 | 7.6282 | 0.9849  | -0.0151 | 2 | 2 | LGG | 14.95 | 0 | 21 | 4  |
| TCGA-P5-A72U | 7.9245 | 1.0116  | 4.4710  | 2 | 2 | LGG | 0.23  | 0 | NA | NA |
| TCGA-DB-A64Q | 8.1964 | 1.0365  | 1.2995  | 2 | 2 | LGG | 5.98  | 0 | 14 | 4  |
| TCGA-FG-A60L | 7.5289 | 1.0491  | 1.3711  | 2 | 2 | LGG | 21.52 | 0 | NA | NA |
| TCGA-HT-A61B | 7.9106 | 1.1507  | -1.1714 | 2 | 2 | LGG | 17.51 | 0 | 34 | 9  |
| TCGA-HT-7479 | 7.3570 | 1.1850  | -1.4001 | 2 | 2 | LGG | 40.31 | 0 | 17 | 4  |
| TCGA-DU-6405 | 7.3892 | 1.2629  | 1.4555  | 2 | 2 | LGG | 19.88 | 1 | 44 | 9  |
| TCGA-DU-8158 | 7.4833 | 1.2674  | 0.4193  | 2 | 2 | LGG | 5.09  | 1 | 33 | 14 |
| TCGA-RY-A83Z | 7.6199 | 1.3272  | 1.0053  | 2 | 2 | LGG | 9.89  | 0 | NA | NA |
| TCGA-RY-A845 | 7.2388 | 1.3319  | -0.4755 | 2 | 2 | LGG | 19.58 | 0 | NA | NA |
| TCGA-E1-A7YQ | 7.8003 | 1.3750  | 1.5676  | 2 | 2 | LGG | 51.84 | 1 | NA | NA |
| TCGA-FN-7833 | 7.4604 | 1.3765  | -0.4309 | 2 | 2 | LGG | 27.50 | 0 | 16 | 9  |
| TCGA-S9-A6U0 | 7.5403 | 1.4675  | 1.4675  | 2 | 2 | LGG | 24.38 | 1 | NA | NA |
| TCGA-DH-A7UT | 7.7320 | 1.5303  | -0.7916 | 2 | 2 | LGG | 17.44 | 1 | NA | NA |
| TCGA-FG-7634 | 7.2926 | 1.5929  | 0.5929  | 2 | 2 | LGG | 15.34 | 0 | 16 | 10 |
| TCGA-HT-8563 | 7.9409 | 1.6077  | 0.7598  | 2 | 2 | LGG | 28.25 | 0 | 19 | 5  |
| TCGA-DU-5853 | 7.5211 | 1.6233  | 0.2083  | 2 | 2 | LGG | 13.37 | 0 | 12 | 6  |
| TCGA-DU-8163 | 7.8422 | 1.7012  | 1.2862  | 2 | 2 | LGG | 20.66 | 0 | 12 | 7  |
| TCGA-HT-7473 | 7.1800 | 1.7212  | 0.8732  | 2 | 2 | LGG | 16.52 | 0 | 13 | NA |
| TCGA-DU-5855 | 7.6246 | 1.8992  | 0.0247  | 2 | 2 | LGG | 6.80  | 0 | 34 | NA |
| TCGA-DU-A5TU | 7.4967 | 1.9293  | 1.3443  | 2 | 2 | LGG | 26.15 | 0 | 27 | NA |
| TCGA-P5-A5EX | 7.6285 | 1.9317  | 0.5166  | 2 | 2 | LGG | 7.98  | 0 | 19 | 7  |
| TCGA-QH-A6X4 | 7.4346 | 1.9395  | -0.3823 | 2 | 2 | LGG | 14.52 | 0 | NA | NA |
| TCGA-DB-A750 | 7.2851 | 2.0376  | -0.7698 | 2 | 2 | LGG | 30.72 | 0 | NA | NA |
| TCGA-CS-6188 | 7.4603 | 2.1177  | 1.9922  | 2 | 2 | LGG | 26.74 | 1 | 26 | 4  |
| TCGA-P5-A736 | 7.3989 | 2.1472  | 0.7321  | 2 | 2 | LGG | 7.56  | 0 | NA | NA |
| TCGA-HT-7690 | 7.9092 | 2.1776  | 1.3475  | 2 | 2 | LGG | 0.10  | 0 | 15 | 9  |
| TCGA-VM-A8CF | 7.3633 | 2.1801  | -0.4049 | 2 | 2 | LGG | 20.01 | 0 | NA | NA |
| TCGA-TQ-A7RV | 7.3972 | 2.1961  | -1.3887 | 2 | 2 | LGG | 61.37 | 0 | NA | NA |
| TCGA-TM-A7CA | 7.5797 | 2.2470  | -0.0749 | 2 | 2 | LGG | 34.76 | 0 | NA | NA |
| TCGA-QH-A6X9 | 7.3198 | 2.2538  | 1.2538  | 2 | 2 | LGG | 1.91  | 0 | NA | NA |
| TCGA-DU-A5TY | 8.0241 | 2.2686  | -0.1908 | 2 | 2 | LGG | 33.94 | 1 | 41 | NA |

|              |        |        |         |   |   |     |       |   |    |    |
|--------------|--------|--------|---------|---|---|-----|-------|---|----|----|
| TCGA-S9-A7R7 | 7.7210 | 2.3267 | 0.1568  | 2 | 2 | LGG | 98.55 | 0 | NA | NA |
| TCGA-E1-A7YJ | 7.3883 | 2.3438 | 2.1512  | 2 | 2 | LGG | 19.45 | 1 | NA | NA |
| TCGA-E1-5302 | 7.6050 | 2.3454 | -0.3549 | 2 | 2 | LGG | 50.10 | 1 | 24 | NA |
| TCGA-HT-7477 | 7.2770 | 2.3948 | 0.1725  | 2 | 2 | LGG | 24.24 | 0 | 33 | 9  |
| TCGA-FG-A70Z | 7.4439 | 2.4194 | 0.7413  | 2 | 2 | LGG | 10.78 | 0 | NA | NA |
| TCGA-HT-7857 | 8.1884 | 2.4731 | -0.5270 | 2 | 2 | LGG | 0.23  | 0 | 12 | NA |
| TCGA-DU-7012 | 7.7429 | 2.4972 | -0.5903 | 2 | 2 | LGG | 6.54  | 1 | 37 | 11 |
| TCGA-DB-5275 | 7.5030 | 2.5022 | -0.0003 | 2 | 2 | LGG | 47.90 | 0 | 26 | 8  |
| TCGA-DU-8161 | 7.6239 | 2.5237 | 1.4457  | 2 | 2 | LGG | 23.72 | 1 | 33 | 7  |
| TCGA-HT-A5RC | 7.5877 | 2.5468 | 2.3058  | 2 | 2 | LGG | 5.32  | 1 | 45 | 8  |
| TCGA-S9-A6U6 | 7.4378 | 2.5892 | 0.2672  | 2 | 2 | LGG | 35.12 | 0 | NA | NA |
| TCGA-DU-7007 | 7.8987 | 2.6572 | 0.7312  | 2 | 2 | LGG | 62.91 | 1 | 27 | 8  |
| TCGA-VM-A8CE | 7.7949 | 2.7773 | 0.0403  | 2 | 2 | LGG | 7.88  | 1 | NA | NA |
| TCGA-QH-A6X8 | 7.8519 | 2.8372 | -0.3328 | 2 | 2 | LGG | 16.72 | 0 | NA | NA |
| TCGA-HT-A617 | 7.5947 | 2.8614 | 1.7619  | 2 | 2 | LGG | 16.13 | 0 | 15 | 7  |
| TCGA-DU-7008 | 7.4935 | 2.9726 | 0.0657  | 2 | 2 | LGG | ####  | 0 | 22 | NA |
| TCGA-S9-A6WC | 7.1641 | 2.9743 | 1.5592  | 2 | 2 | LGG | 85.48 | 0 | NA | NA |
| TCGA-DU-8165 | 7.4803 | 2.9787 | 0.9084  | 2 | 2 | LGG | 19.12 | 0 | 53 | 7  |
| TCGA-DB-A64O | 7.2896 | 3.0608 | -0.9393 | 2 | 2 | LGG | 25.46 | 1 | 18 | NA |
| TCGA-DU-7298 | 7.1732 | 3.0799 | -0.7782 | 2 | 2 | LGG | 18.92 | 1 | 26 | NA |
| TCGA-RY-A843 | 7.8376 | 3.1428 | -1.3808 | 2 | 2 | LGG | 2.07  | 0 | NA | NA |
| TCGA-S9-A6UA | 7.9412 | 3.1672 | -0.4767 | 2 | 2 | LGG | 5.85  | 1 | NA | NA |
| TCGA-P5-A77X | 7.2570 | 3.3501 | -1.2937 | 2 | 2 | LGG | 3.45  | 0 | NA | NA |
| TCGA-DB-A4XC | 7.8912 | 3.4395 | 0.9370  | 2 | 2 | LGG | 46.68 | 0 | 14 | 7  |
| TCGA-HT-A5R5 | 7.3343 | 3.4967 | 0.0373  | 2 | 2 | LGG | 0.13  | 0 | 16 | 9  |
| TCGA-E1-A7YL | 7.5782 | 3.5251 | 4.5251  | 2 | 2 | LGG | 16.16 | 1 | NA | NA |
| TCGA-HW-8319 | 7.7941 | 3.6259 | -0.6595 | 2 | 2 | LGG | 39.72 | 1 | 24 | 11 |
| TCGA-HT-A61C | 7.9392 | 3.6518 | 0.6518  | 2 | 2 | LGG | 17.64 | 1 | 35 | 9  |
| TCGA-DU-5852 | 7.7050 | 3.6595 | 0.4895  | 2 | 2 | LGG | 6.73  | 1 | 53 | 17 |
| TCGA-HT-7882 | 8.2483 | 3.7432 | 2.3143  | 2 | 2 | LGG | 3.71  | 1 | 33 | 3  |
| TCGA-E1-A7YO | 7.2026 | 3.7522 | 0.3372  | 2 | 2 | LGG | 74.97 | 1 | NA | NA |
| TCGA-FG-6688 | 7.2783 | 3.7740 | 1.3718  | 2 | 2 | LGG | 18.76 | 0 | 51 | NA |
| TCGA-DU-A76L | 8.0374 | 3.8827 | 1.9192  | 2 | 2 | LGG | 26.74 | 1 | NA | NA |
| TCGA-TM-A84B | 7.5161 | 3.8845 | 3.1278  | 2 | 2 | LGG | 24.90 | 1 | NA | NA |
| TCGA-FG-A6J3 | 7.6578 | 4.0460 | 2.2617  | 2 | 2 | LGG | 22.24 | 0 | NA | NA |
| TCGA-E1-A7YK | 7.4812 | 4.1692 | 0.7097  | 2 | 2 | LGG | 12.42 | 1 | NA | NA |
| TCGA-HT-7860 | 7.8303 | 4.1708 | 1.5270  | 2 | 2 | LGG | 0.49  | 0 | 55 | NA |
| TCGA-S9-A7IX | 7.4937 | 4.2805 | 1.1809  | 2 | 2 | LGG | 26.91 | 1 | NA | NA |
| TCGA-HT-7687 | 7.3016 | 4.3373 | -1.4957 | 2 | 2 | LGG | 0.10  | 0 | 28 | 5  |
| TCGA-VM-A8C9 | 7.4677 | 4.3488 | -0.6513 | 2 | 2 | LGG | 43.17 | 0 | NA | NA |
| TCGA-E1-A7YM | 7.3960 | 4.5636 | 0.9786  | 2 | 2 | LGG | 21.29 | 1 | NA | NA |
| TCGA-DU-5851 | 7.1962 | 4.6024 | 0.7544  | 2 | 2 | LGG | 17.44 | 0 | 20 | NA |
| TCGA-S9-A7IZ | 7.3067 | 4.6805 | 3.1198  | 2 | 2 | LGG | 19.97 | 0 | NA | NA |
| TCGA-DU-5854 | 7.4739 | 4.7739 | 1.1890  | 2 | 2 | LGG | 8.44  | 0 | 37 | NA |
| TCGA-HT-A5RA | 7.4351 | 4.7992 | 3.2532  | 2 | 2 | LGG | 27.33 | 0 | 38 | 14 |
| TCGA-QH-A6CX | 7.1578 | 4.8059 | 0.7470  | 2 | 2 | LGG | 12.22 | 1 | NA | NA |
| TCGA-CS-5395 | 7.2301 | 4.8145 | -0.4334 | 2 | 2 | LGG | 20.99 | 1 | 33 | 9  |
| TCGA-HT-A74J | 7.2330 | 4.8359 | 0.7915  | 2 | 2 | LGG | 10.51 | 0 | NA | NA |
| TCGA-HT-7854 | 7.1482 | 4.8449 | -1.4771 | 2 | 2 | LGG | 39.45 | 0 | 20 | NA |
| TCGA-CS-5397 | 7.3474 | 4.9185 | 0.4266  | 2 | 2 | LGG | 6.37  | 1 | 29 | 7  |
| TCGA-HT-8104 | 7.2583 | 5.5692 | 1.6888  | 2 | 2 | LGG | 12.22 | 0 | 47 | 10 |
| TCGA-HT-A74H | 7.3452 | 5.7873 | 1.3279  | 2 | 2 | LGG | 2.43  | 0 | NA | NA |
| TCGA-HT-8018 | 7.2351 | 5.8338 | 0.6638  | 2 | 2 | LGG | 37.84 | 1 | 15 | 7  |
| TCGA-TQ-A7RP | 7.5909 | 5.8906 | 2.8726  | 2 | 2 | LGG | 30.03 | 0 | NA | NA |



|              |         |         |         |   |   |      |       |   |      |     |
|--------------|---------|---------|---------|---|---|------|-------|---|------|-----|
| TCGA-E1-A7YN | 8.7078  | 6.1141  | 1.1368  | 2 | 2 | LGG  | 23.88 | 1 | NA   | NA  |
| TCGA-P6-A5OG | 8.9077  | 6.0131  | 4.1863  | 2 | 2 | ACC  | 12.58 | 1 | 214  | NA  |
| TCGA-OR-A5JO | 7.7102  | 2.5702  | 3.5031  | 2 | 2 | ACC  | 39.22 | 0 | 22   | NA  |
| TCGA-PK-A5H9 | 7.6705  | 0.0660  | 3.2884  | 2 | 2 | ACC  | 20.24 | 0 | 25   | NA  |
| TCGA-OR-A5J8 | 9.2008  | 1.5366  | 2.9771  | 2 | 2 | ACC  | 19.02 | 1 | 98   | NA  |
| TCGA-OR-A5KY | 6.6887  | #NUM!   | 1.8245  | 2 | 2 | ACC  | 12.84 | 1 | 37   | NA  |
| TCGA-OR-A5LN | 5.9641  | #NUM!   | 1.7942  | 2 | 2 | ACC  | 76.94 | 0 | 25   | NA  |
| TCGA-OR-A5JA | 6.8680  | #NUM!   | 1.4020  | 2 | 2 | ACC  | 30.29 | 1 | 477  | NA  |
| TCGA-OR-A5K2 | 6.3886  | #NUM!   | 1.3736  | 2 | 2 | ACC  | 32.65 | 1 | 57   | NA  |
| TCGA-OR-A5J1 | 6.6626  | #NUM!   | 1.2639  | 2 | 2 | ACC  | 44.51 | 1 | 32   | NA  |
| TCGA-OR-A5JF | 6.2922  | #NUM!   | 0.9491  | 2 | 2 | ACC  | 66.20 | 0 | 80   | NA  |
| TCGA-OR-A5KZ | 6.3756  | #NUM!   | 0.8625  | 2 | 2 | ACC  | 4.11  | 1 | 36   | NA  |
| TCGA-OR-A5LB | 6.5855  | #NUM!   | 0.4842  | 2 | 2 | ACC  | 39.55 | 1 | 248  | NA  |
| TCGA-OR-A5JY | 4.0505  | -1.1591 | 0.4260  | 2 | 2 | ACC  | 18.13 | 1 | 80   | NA  |
| TCGA-OR-A5K3 | 6.4375  | #NUM!   | 0.3715  | 2 | 2 | ACC  | ####  | 0 | 33   | NA  |
| TCGA-OR-A5LO | 6.9461  | #NUM!   | -0.0572 | 2 | 2 | ACC  | 79.01 | 1 | 77   | NA  |
| TCGA-OR-A5JW | 6.0110  | #NUM!   | -0.1884 | 2 | 2 | ACC  | 72.34 | 0 | 37   | NA  |
| TCGA-OR-A5LT | 6.6116  | #NUM!   | -0.2340 | 2 | 2 | ACC  | 18.04 | 0 | 39   | NA  |
| TCGA-OU-A5PI | 6.3492  | #NUM!   | -0.8107 | 2 | 2 | ACC  | 38.47 | 0 | 48   | NA  |
| TCGA-OR-A5J6 | 7.0465  | #NUM!   | -0.8393 | 2 | 2 | ACC  | 88.80 | 0 | 42   | NA  |
| TCGA-OR-A5JG | 3.8590  | #NUM!   | -0.8959 | 2 | 2 | ACC  | 17.77 | 1 | 40   | NA  |
| TCGA-PK-A5HB | 3.0739  | #NUM!   | -1.3183 | 2 | 2 | ACC  | 42.48 | 0 | 946  | NA  |
| TCGA-OR-A5L8 | 7.0536  | #NUM!   | -1.3255 | 2 | 2 | ACC  | 29.07 | 0 | 28   | NA  |
| TCGA-OR-A5JV | 6.8149  | #NUM!   | #NUM!   | 2 | 2 | ACC  | 66.46 | 0 | 30   | NA  |
| TCGA-OR-A5JR | 6.4637  | #NUM!   | #NUM!   | 2 | 2 | ACC  | ####  | 0 | 14   | NA  |
| TCGA-QB-A6FS | 6.75633 | 2.66118 | #NUM!   | 2 | 2 | SKCM | 7     | 0 | 934  | NA  |
| TCGA-D3-A8GI | 6.06403 | 2.64256 | #NUM!   | 2 | 2 | SKCM | 58    | 1 | NA   | NA  |
| TCGA-DA-A95V | 6.63430 | 2.57754 | #NUM!   | 2 | 2 | SKCM | 72    | 0 | NA   | NA  |
| TCGA-D3-A1Q9 | 5.58764 | 2.39830 | #NUM!   | 2 | 2 | SKCM | 32    | 1 | 36   | NA  |
| TCGA-EE-A2GU | 5.83418 | 2.34934 | #NUM!   | 2 | 2 | SKCM | 95    | 0 | 474  | NA  |
| TCGA-EE-A2GO | 6.79954 | 2.32970 | #NUM!   | 2 | 2 | SKCM | 127   | 0 | 1540 | 261 |
| TCGA-FS-A4F4 | 6.95540 | 2.27131 | #NUM!   | 2 | 2 | SKCM | 67    | 1 | 38   | NA  |
| TCGA-EB-A4XL | 6.70460 | 2.04163 | #NUM!   | 2 | 2 | SKCM | 26    | 0 | 369  | NA  |
| TCGA-D3-A2JK | 6.76191 | 1.95457 | #NUM!   | 2 | 2 | SKCM | 12    | 1 | 230  | NA  |
| TCGA-FW-A5DX | 6.59048 | 1.87900 | #NUM!   | 2 | 2 | SKCM | 21    | 0 | 159  | NA  |
| TCGA-D3-A3MU | 6.09720 | 1.83248 | #NUM!   | 2 | 2 | SKCM | 40    | 0 | 408  | NA  |
| TCGA-D9-A1JW | 7.05950 | 1.75271 | #NUM!   | 2 | 2 | SKCM | 4     | 0 | 720  | NA  |
| TCGA-FR-A726 | 6.50658 | 1.75168 | #NUM!   | 2 | 2 | SKCM | 10    | 1 | 6215 | NA  |
| TCGA-EE-A3AD | 6.30573 | 1.62826 | #NUM!   | 2 | 2 | SKCM | 29    | 1 | 342  | NA  |
| TCGA-EB-A5UL | 6.69657 | 1.61042 | #NUM!   | 2 | 2 | SKCM | 29    | 0 | 384  | NA  |
| TCGA-EE-A2A5 | 7.12548 | 1.57090 | #NUM!   | 2 | 2 | SKCM | 39    | 1 | 270  | 42  |
| TCGA-EE-A29E | 7.14146 | 1.51213 | #NUM!   | 2 | 2 | SKCM | 64    | 0 | 2759 | NA  |
| TCGA-EE-A29B | 7.01717 | 1.37835 | #NUM!   | 2 | 2 | SKCM | 85    | 1 | 449  | 54  |
| TCGA-FW-A3TU | 7.14951 | 1.37351 | #NUM!   | 2 | 2 | SKCM | 56    | 1 | 623  | NA  |
| TCGA-FW-A3I3 | 6.33286 | 1.31626 | #NUM!   | 2 | 2 | SKCM | 17    | 0 | 63   | 12  |
| TCGA-BF-AAP8 | 6.93559 | 1.31383 | #NUM!   | 2 | 2 | SKCM | 15    | 0 | NA   | NA  |
| TCGA-BF-A1Q0 | 7.15453 | 1.30112 | #NUM!   | 2 | 2 | SKCM | 27    | 0 | 565  | 68  |
| TCGA-FS-A4FD | 7.11091 | 1.29924 | #NUM!   | 2 | 2 | SKCM | 81    | 1 | 370  | NA  |
| TCGA-EE-A3JI | 4.73787 | 1.16633 | #NUM!   | 2 | 2 | SKCM | 153   | 1 | 1001 | NA  |
| TCGA-WE-A8K6 | 7.15479 | 1.13245 | #NUM!   | 2 | 2 | SKCM | 18    | 0 | NA   | NA  |
| TCGA-W3-AA1C | 4.63704 | 1.11350 | #NUM!   | 2 | 2 | SKCM | 69    | 1 | NA   | NA  |
| TCGA-DA-A95W | 3.95569 | 1.00151 | #NUM!   | 2 | 2 | SKCM | 37    | 0 | NA   | NA  |
| TCGA-FS-A1YW | 6.51957 | 0.98039 | #NUM!   | 2 | 2 | SKCM | 217   | 1 | 129  | NA  |
| TCGA-EE-A29R | 6.63756 | 0.95271 | #NUM!   | 2 | 2 | SKCM | 14    | 0 | 521  | NA  |

|              |         |          |          |   |   |      |     |   |      |     |
|--------------|---------|----------|----------|---|---|------|-----|---|------|-----|
| TCGA-EE-A3JA | 6.16114 | 0.91319  | #NUM!    | 2 | 2 | SKCM | 53  | 1 | 774  | NA  |
| TCGA-EE-A2GI | 7.05064 | 0.90766  | #NUM!    | 2 | 2 | SKCM | 49  | 0 | 1267 | NA  |
| TCGA-EE-A2MP | 7.08329 | 0.89033  | #NUM!    | 2 | 2 | SKCM | 248 | 0 | 246  | NA  |
| TCGA-EB-A5KH | 6.58886 | 0.87924  | #NUM!    | 2 | 2 | SKCM | 20  | 1 | 42   | NA  |
| TCGA-EE-A29S | 5.53952 | 0.85766  | -1.72738 | 2 | 2 | SKCM | 61  | 1 | 826  | NA  |
| TCGA-EB-A5SE | 6.32722 | 0.85471  | #NUM!    | 2 | 2 | SKCM | 13  | 1 | 225  | NA  |
| TCGA-D3-A5GU | 7.04197 | 0.85216  | #NUM!    | 2 | 2 | SKCM | 125 | 0 | NA   | NA  |
| TCGA-ER-A3ES | 6.17004 | 0.84808  | #NUM!    | 2 | 2 | SKCM | 247 | 1 | 34   | NA  |
| TCGA-BF-A5ES | 6.99713 | 0.79419  | #NUM!    | 2 | 2 | SKCM | 16  | 0 | 401  | NA  |
| TCGA-D3-A51E | 6.86837 | 0.78090  | #NUM!    | 2 | 2 | SKCM | 175 | 0 | 240  | NA  |
| TCGA-FS-A1ZW | 6.95475 | 0.70682  | #NUM!    | 2 | 2 | SKCM | 49  | 0 | 538  | NA  |
| TCGA-D9-A6EC | 6.54300 | 0.68536  | #NUM!    | 2 | 2 | SKCM | 78  | 0 | 3750 | NA  |
| TCGA-XV-A9W5 | 6.56726 | 0.68041  | #NUM!    | 2 | 2 | SKCM | 13  | 0 | NA   | NA  |
| TCGA-EB-A3XB | 6.86465 | 0.63654  | #NUM!    | 2 | 2 | SKCM | 26  | 0 | 409  | NA  |
| TCGA-EB-A5SH | 4.53728 | 0.63041  | #NUM!    | 2 | 2 | SKCM | 54  | 0 | 94   | NA  |
| TCGA-EE-A2GB | 7.05198 | 0.58794  | #NUM!    | 2 | 2 | SKCM | 59  | 0 | 538  | NA  |
| TCGA-D3-A1QA | 4.53196 | 0.57773  | #NUM!    | 2 | 2 | SKCM | 91  | 0 | 339  | NA  |
| TCGA-D3-A5GT | 5.45718 | 0.57454  | #NUM!    | 2 | 2 | SKCM | 16  | 0 | 25   | NA  |
| TCGA-W3-AA1F | 6.20863 | 0.51015  | #NUM!    | 2 | 2 | SKCM | 111 | 1 | NA   | NA  |
| TCGA-EE-A2MC | 5.54694 | 0.45943  | #NUM!    | 2 | 2 | SKCM | 43  | 1 | 215  | NA  |
| TCGA-FR-A3R1 | 6.47224 | 0.41316  | #NUM!    | 2 | 2 | SKCM | 22  | 0 | 400  | NA  |
| TCGA-BF-A1PU | 6.17797 | 0.37707  | -1.62282 | 2 | 2 | SKCM | 13  | 0 | 71   | 18  |
| TCGA-EB-A5UV | 6.04482 | 0.37239  | #NUM!    | 2 | 2 | SKCM | 26  | 0 | 466  | NA  |
| TCGA-FS-A1YY | 6.40684 | 0.35806  | -1.96409 | 2 | 2 | SKCM | 228 | 1 | 163  | 17  |
| TCGA-D3-A2JL | 7.13490 | 0.25229  | #NUM!    | 2 | 2 | SKCM | 171 | 0 | 274  | NA  |
| TCGA-EB-A44R | 6.91939 | 0.24696  | #NUM!    | 2 | 2 | SKCM | 10  | 1 | 48   | NA  |
| TCGA-BF-A3DN | 7.08965 | 0.21388  | -1.78588 | 2 | 2 | SKCM | 24  | 0 | 69   | 13  |
| TCGA-EE-A3AG | 7.04206 | 0.19661  | #NUM!    | 2 | 2 | SKCM | 42  | 1 | 1319 | 169 |
| TCGA-D3-A8GC | 6.92152 | 0.14887  | #NUM!    | 2 | 2 | SKCM | 80  | 1 | NA   | NA  |
| TCGA-EB-A97M | 6.22395 | 0.12592  | #NUM!    | 2 | 2 | SKCM | 14  | 0 | NA   | NA  |
| TCGA-EB-A24D | 5.48408 | 0.04670  | -1.53826 | 2 | 2 | SKCM | 21  | 0 | 461  | 70  |
| TCGA-D3-A5GS | 7.05709 | -0.00361 | #NUM!    | 2 | 2 | SKCM | 18  | 0 | 321  | NA  |
| TCGA-D3-A2J6 | 7.11537 | -0.00665 | #NUM!    | 2 | 2 | SKCM | 43  | 1 | 19   | NA  |
| TCGA-EB-A430 | 6.10455 | -0.05200 | -1.63711 | 2 | 2 | SKCM | 0   | 0 | 326  | NA  |
| TCGA-EE-A3J7 | 5.44211 | -0.11107 | -1.69619 | 2 | 2 | SKCM | 64  | 0 | 807  | 130 |
| TCGA-EB-A41A | 6.75153 | -0.20623 | #NUM!    | 2 | 2 | SKCM | 9   | 0 | 1469 | NA  |
| TCGA-EE-A2GR | 5.97913 | -0.25929 | #NUM!    | 2 | 2 | SKCM | 43  | 1 | 1260 | 157 |
| TCGA-FS-A1ZG | 6.57573 | -0.28630 | #NUM!    | 2 | 2 | SKCM | 10  | 1 | 29   | NA  |
| TCGA-WE-A8K5 | 5.95792 | -0.36401 | #NUM!    | 2 | 2 | SKCM | 61  | 1 | NA   | NA  |
| TCGA-DA-A95Z | 5.11612 | -0.46893 | #NUM!    | 2 | 2 | SKCM | 13  | 0 | NA   | NA  |
| TCGA-FS-A1ZJ | 6.73100 | -0.62660 | -1.62638 | 2 | 2 | SKCM | 47  | 1 | 56   | NA  |
| TCGA-EB-A42Z | 6.37391 | -0.63084 | -1.63084 | 2 | 2 | SKCM | 14  | 0 | 92   | NA  |
| TCGA-EE-A2ML | 5.56911 | -0.63913 | #NUM!    | 2 | 2 | SKCM | 216 | 1 | 458  | NA  |
| TCGA-GF-A2C7 | 6.81940 | -0.66041 | #NUM!    | 2 | 2 | SKCM | 1   | 0 | 65   | 14  |
| TCGA-ER-A194 | 5.82288 | -0.71620 | #NUM!    | 2 | 2 | SKCM | 44  | 1 | 1087 | 122 |
| TCGA-GN-A264 | 6.22449 | -0.78612 | #NUM!    | 2 | 2 | SKCM | 118 | 1 | 48   | NA  |
| TCGA-FR-A8YC | 4.88082 | -0.79161 | #NUM!    | 2 | 2 | SKCM | 35  | 1 | NA   | NA  |
| TCGA-W3-AA21 | 6.33652 | -0.93954 | #NUM!    | 2 | 2 | SKCM | 105 | 1 | NA   | NA  |
| TCGA-EB-A4P0 | 6.31774 | -1.04871 | #NUM!    | 2 | 2 | SKCM | 11  | 1 | 157  | NA  |
| TCGA-ER-A19L | 6.46630 | -1.09296 | #NUM!    | 2 | 2 | SKCM | 131 | 1 | 50   | NA  |
| TCGA-LH-A9QB | 6.07773 | -1.27823 | #NUM!    | 2 | 2 | SKCM | 368 | 0 | NA   | NA  |
| TCGA-EB-A51B | 6.94222 | -1.36476 | #NUM!    | 2 | 2 | SKCM | 31  | 0 | NA   | NA  |
| TCGA-FS-A4F5 | 6.43135 | -1.53994 | #NUM!    | 2 | 2 | SKCM | 29  | 1 | 618  | NA  |
| TCGA-EE-A3J4 | 4.77695 | -1.54498 | -1.54498 | 2 | 2 | SKCM | 127 | 1 | 277  | 33  |

|              |         |          |          |   |   |      |      |   |      |      |
|--------------|---------|----------|----------|---|---|------|------|---|------|------|
| TCGA-EE-A29L | 6.92093 | -1.74082 | #NUM!    | 2 | 2 | SKCM | 3    | 1 | 1586 | NA   |
| TCGA-D9-A6EG | 5.89582 | -1.76170 | #NUM!    | 2 | 2 | SKCM | 23   | 1 | 69   | NA   |
| TCGA-EB-A1NK | 6.97213 | -1.90347 | -1.90347 | 2 | 2 | SKCM | 34   | 0 | 117  | 16   |
| TCGA-FS-A1ZZ | 5.23333 | -1.91648 | #NUM!    | 2 | 2 | SKCM | 27   | 1 | 1186 | NA   |
| TCGA-GN-A269 | #NUM!   | #NUM!    | #NUM!    | 2 | 2 | SKCM | 6    | 1 | #N/A | #N/A |
| TCGA-EE-A3J8 | 1.55341 | #NUM!    | #NUM!    | 2 | 2 | SKCM | 34   | 1 | 216  | 41   |
| TCGA-FS-A4F0 | 2.98703 | #NUM!    | #NUM!    | 2 | 2 | SKCM | 78   | 0 | NA   | NA   |
| TCGA-DA-A960 | 3.81050 | #NUM!    | #NUM!    | 2 | 2 | SKCM | 26   | 0 | NA   | NA   |
| TCGA-XV-AB01 | 4.98552 | #NUM!    | #NUM!    | 2 | 2 | SKCM | 13   | 0 | #N/A | #N/A |
| TCGA-D3-A8GR | 5.52657 | #NUM!    | #NUM!    | 2 | 2 | SKCM | 130  | 1 | NA   | NA   |
| TCGA-YG-AA3P | 6.10224 | #NUM!    | #NUM!    | 2 | 2 | SKCM | 14   | 0 | NA   | NA   |
| TCGA-ER-A2NB | 6.15773 | #NUM!    | #NUM!    | 2 | 2 | SKCM | 28   | 1 | #N/A | #N/A |
| TCGA-ER-A42H | 6.29120 | #NUM!    | #NUM!    | 2 | 2 | SKCM | 14   | 1 | 51   | NA   |
| TCGA-D3-A8GP | 6.29244 | #NUM!    | #NUM!    | 2 | 2 | SKCM | 153  | 0 | NA   | NA   |
| TCGA-EE-A2GC | 6.33352 | #NUM!    | #NUM!    | 2 | 2 | SKCM | 67   | 0 | 1845 | NA   |
| TCGA-DA-A1IA | 6.40116 | #NUM!    | #NUM!    | 2 | 2 | SKCM | 66   | 1 | 267  | 65   |
| TCGA-BF-A9VF | 6.85668 | #NUM!    | #NUM!    | 2 | 2 | SKCM | 14   | 0 | NA   | NA   |
| TCGA-GN-A4U3 | 6.88123 | #NUM!    | #NUM!    | 2 | 2 | SKCM | 122  | 0 | 249  | NA   |
| TCGA-GN-A8LK | 6.91406 | #NUM!    | #NUM!    | 2 | 2 | SKCM | 50   | 1 | NA   | NA   |
| TCGA-D3-A8GV | 7.05394 | #NUM!    | #NUM!    | 2 | 2 | SKCM | 168  | 1 | NA   | NA   |
| TCGA-D3-A1Q5 | 7.22447 | 6.88531  | 6.50470  | 2 | 2 | SKCM | 112  | 1 | 288  | NA   |
| TCGA-DA-A3F2 | 8.10897 | 5.64964  | 2.59075  | 2 | 2 | SKCM | 34   | 1 | 9    | 2    |
| TCGA-WE-AAA4 | 7.56948 | 5.29376  | 2.14401  | 2 | 2 | SKCM | 25   | 0 | NA   | NA   |
| TCGA-EE-A2A1 | 8.42524 | 5.03033  | 3.57514  | 2 | 2 | SKCM | 116  | 0 | 323  | NA   |
| TCGA-D3-A51F | 8.73676 | 4.90404  | -1.26604 | 2 | 2 | SKCM | 56   | 0 | 99   | NA   |
| TCGA-Z2-A8RT | 8.37565 | 4.67702  | -1.36736 | 2 | 2 | SKCM | 28   | 0 | NA   | NA   |
| TCGA-ER-A1A1 | 8.47379 | 4.43884  | 2.92098  | 2 | 2 | SKCM | 105  | 0 | 212  | NA   |
| TCGA-ER-A19B | 7.38721 | 4.40267  | -0.52803 | 2 | 2 | SKCM | 98   | 1 | 100  | NA   |
| TCGA-GN-A265 | 8.27804 | 4.40095  | 5.42520  | 2 | 2 | SKCM | 97   | 0 | 231  | NA   |
| TCGA-FS-A1Z4 | 8.52626 | 4.34993  | 2.00755  | 2 | 2 | SKCM | 28   | 1 | 36   | NA   |
| TCGA-D3-A2J8 | 8.74665 | 4.34478  | 1.02283  | 2 | 2 | SKCM | 65   | 1 | 510  | NA   |
| TCGA-ER-A42L | 7.49379 | 4.34208  | 1.19522  | 2 | 2 | SKCM | 149  | 0 | 791  | NA   |
| TCGA-ER-A195 | 8.73360 | 4.33241  | 1.79635  | 2 | 2 | SKCM | 35   | 1 | 203  | NA   |
| TCGA-EE-A2GE | 8.00338 | 4.27659  | 0.44371  | 2 | 2 | SKCM | 174  | 0 | 202  | NA   |
| TCGA-D3-A3BZ | 7.93753 | 4.01592  | 1.53789  | 2 | 2 | SKCM | 131  | 0 | 70   | NA   |
| TCGA-EE-A2MC | 8.66787 | 3.93236  | 2.59132  | 2 | 2 | SKCM | 61   | 1 | 612  | NA   |
| TCGA-FS-A4F8 | 8.09963 | 3.85754  | 1.77007  | 2 | 2 | SKCM | 175  | 1 | 151  | NA   |
| TCGA-ER-A19A | 8.38199 | 3.79316  | 2.14929  | 2 | 2 | SKCM | 78   | 0 | 338  | 42   |
| TCGA-EB-A6L9 | 7.87715 | 3.72523  | 1.23983  | 2 | 2 | SKCM | 36   | 0 | 21   | NA   |
| TCGA-DA-A1I4 | 7.75822 | 3.66619  | 0.85886  | 2 | 2 | SKCM | 36   | 1 | 223  | 40   |
| TCGA-FW-A5DY | 7.32682 | 3.63653  | 0.46665  | 2 | 2 | SKCM | 19   | 0 | 196  | NA   |
| TCGA-ER-A19P | 8.45762 | 3.63014  | -1.49899 | 2 | 2 | SKCM | 162  | 1 | 1495 | NA   |
| TCGA-ER-A19O | 7.23932 | 3.62846  | -0.89513 | 2 | 2 | SKCM | #### | 1 | 145  | NA   |
| TCGA-FS-A1ZT | 7.56710 | 3.54955  | -1.53784 | 2 | 2 | SKCM | 53   | 0 | 142  | NA   |
| TCGA-FR-A729 | 8.17680 | 3.48047  | 1.04754  | 2 | 2 | SKCM | 221  | 0 | NA   | NA   |
| TCGA-ER-A19W | 8.27975 | 3.47645  | -1.27858 | 2 | 2 | SKCM | 148  | 1 | 273  | NA   |
| TCGA-EE-A2GK | 8.63776 | 3.46471  | 1.08617  | 2 | 2 | SKCM | 55   | 0 | 6    | NA   |
| TCGA-W3-A828 | 8.18087 | 3.41399  | 1.53953  | 2 | 2 | SKCM | 121  | 1 | NA   | NA   |
| TCGA-WE-AA9Y | 7.35113 | 3.39745  | 1.39747  | 2 | 2 | SKCM | 12   | 0 | NA   | NA   |
| TCGA-FS-A1Z7 | 7.23212 | 3.36488  | 2.77991  | 2 | 2 | SKCM | 8    | 1 | 155  | NA   |
| TCGA-D3-A8GB | 7.71294 | 3.33663  | 0.75164  | 2 | 2 | SKCM | 31   | 1 | NA   | NA   |
| TCGA-D3-A51J | 7.96747 | 3.25651  | -1.38722 | 2 | 2 | SKCM | 145  | 0 | 372  | NA   |
| TCGA-ER-A42K | 7.62750 | 3.24982  | -0.33515 | 2 | 2 | SKCM | 13   | 1 | 152  | NA   |
| TCGA-BF-AAP7 | 8.17589 | 3.22070  | -0.58662 | 2 | 2 | SKCM | 10   | 0 | NA   | NA   |

|              |         |         |          |   |   |      |      |   |      |      |
|--------------|---------|---------|----------|---|---|------|------|---|------|------|
| TCGA-EE-A2MS | 7.83662 | 3.18023 | -1.46355 | 2 | 2 | SKCM | 162  | 0 | 2255 | NA   |
| TCGA-DA-A1IB | 8.29825 | 3.04907 | -1.12092 | 2 | 2 | SKCM | 41   | 1 | 25   | NA   |
| TCGA-EB-A85I | 7.59053 | 3.04033 | 0.81795  | 2 | 2 | SKCM | 12   | 0 | NA   | NA   |
| TCGA-EE-A29M | 7.79889 | 3.02866 | -0.55639 | 2 | 2 | SKCM | 57   | 0 | 1859 | NA   |
| TCGA-ER-A19D | 7.96922 | 2.99106 | -1.25670 | 2 | 2 | SKCM | 13   | 1 | 360  | 61   |
| TCGA-EB-A55I | 7.70610 | 2.93885 | -1.14848 | 2 | 2 | SKCM | 19   | 0 | 279  | NA   |
| TCGA-D3-A51H | 8.07947 | 2.93787 | 0.35287  | 2 | 2 | SKCM | 56   | 0 | 48   | NA   |
| TCGA-EB-A4IS | 7.78958 | 2.93259 | 1.54028  | 2 | 2 | SKCM | 25   | 0 | 442  | NA   |
| TCGA-EE-A2M8 | 8.29216 | 2.91064 | -1.41120 | 2 | 2 | SKCM | 20   | 1 | 95   | NA   |
| TCGA-FW-A3TV | 7.76351 | 2.87684 | -0.87806 | 2 | 2 | SKCM | 14   | 0 | 273  | NA   |
| TCGA-EE-A2GP | 8.32692 | 2.81209 | -1.35771 | 2 | 2 | SKCM | 14   | 1 | 502  | 68   |
| TCGA-EB-A5VV | 8.30878 | 2.80950 | -0.77547 | 2 | 2 | SKCM | 7    | 0 | 10   | NA   |
| TCGA-D3-A2JP | 7.18939 | 2.72631 | -1.44379 | 2 | 2 | SKCM | 60   | 0 | 224  | NA   |
| TCGA-GV-A3QC | #NUM!   | #NUM!   | #NUM!    | 2 | 2 | BLCA | #### | 1 | 87   | 10   |
| TCGA-GD-A76B | #NUM!   | #NUM!   | #NUM!    | 2 | 2 | BLCA | #### | 1 | NA   | NA   |
| TCGA-K4-A4AB | #NUM!   | #NUM!   | #NUM!    | 2 | 2 | BLCA | 3    | 0 | NA   | NA   |
| TCGA-K4-A3WU | #NUM!   | #NUM!   | #NUM!    | 2 | 2 | BLCA | 3    | 0 | 195  | 47   |
| TCGA-XF-AAMF | #NUM!   | #NUM!   | #NUM!    | 2 | 2 | BLCA | 11   | 1 | #N/A | #N/A |
| TCGA-BT-A42B | #NUM!   | #NUM!   | #NUM!    | 2 | 2 | BLCA | 18   | 1 | #N/A | #N/A |
| TCGA-GV-A3QK | #NUM!   | #NUM!   | #NUM!    | 2 | 2 | BLCA | 27   | 0 | 130  | 24   |
| TCGA-XF-A9SG | #NUM!   | #NUM!   | #NUM!    | 2 | 2 | BLCA | 49   | 0 | #N/A | #N/A |
| TCGA-ZF-A9RG | #NUM!   | #NUM!   | #NUM!    | 2 | 2 | BLCA | 59   | 0 | #N/A | #N/A |
| TCGA-CF-A8HX | #####   | #####   | #####    | 2 | 2 | BLCA | 11   | 0 | NA   | NA   |
| TCGA-ZF-AA4U | #####   | #####   | #####    | 2 | 2 | BLCA | 9    | 1 | NA   | NA   |
| TCGA-DK-A3IS | #####   | #####   | #NUM!    | 2 | 2 | BLCA | 50   | 0 | 299  | 74   |
| TCGA-4Z-AA7Y | #####   | #####   | #####    | 2 | 2 | BLCA | 50   | 0 | NA   | NA   |
| TCGA-GV-A40G | #####   | #####   | #NUM!    | 2 | 2 | BLCA | 19   | 0 | 153  | 25   |
| TCGA-CF-A3MC | #####   | #####   | #####    | 2 | 2 | BLCA | 12   | 0 | 127  | 22   |
| TCGA-DK-AA6P | #####   | #####   | #####    | 2 | 2 | BLCA | 15   | 0 | NA   | NA   |
| TCGA-G2-AA3F | #####   | #####   | #NUM!    | 2 | 2 | BLCA | 29   | 0 | NA   | NA   |
| TCGA-DK-A1AG | #####   | #####   | #NUM!    | 2 | 2 | BLCA | 16   | 0 | 109  | 20   |
| TCGA-FD-A43X | #####   | #NUM!   | #NUM!    | 2 | 2 | BLCA | 4    | 0 | NA   | NA   |
| TCGA-GU-A763 | #####   | #NUM!   | #NUM!    | 2 | 2 | BLCA | 33   | 0 | NA   | NA   |
| TCGA-ZF-A9R4 | #####   | #####   | #NUM!    | 2 | 2 | BLCA | 30   | 0 | NA   | NA   |
| TCGA-4Z-AA7O | #####   | #####   | #####    | 2 | 2 | BLCA | 17   | 0 | NA   | NA   |
| TCGA-S5-AA26 | #####   | #####   | #####    | 2 | 2 | BLCA | 17   | 0 | NA   | NA   |
| TCGA-CF-A47X | #####   | #####   | #NUM!    | 2 | 2 | BLCA | 13   | 0 | NA   | NA   |
| TCGA-DK-A1AE | #####   | #NUM!   | #NUM!    | 2 | 2 | BLCA | 16   | 0 | 113  | 23   |
| TCGA-4Z-AA89 | #####   | #####   | #####    | 2 | 2 | BLCA | 34   | 0 | NA   | NA   |
| TCGA-GV-A3QI | #####   | #####   | #NUM!    | 2 | 2 | BLCA | 36   | 0 | 400  | 96   |
| TCGA-CU-A0YR | #####   | #####   | #####    | 2 | 2 | BLCA | 15   | 1 | 130  | 34   |
| TCGA-CF-A9FH | #####   | #####   | #####    | 2 | 2 | BLCA | #### | 0 | NA   | NA   |
| TCGA-KQ-A41Q | #####   | #NUM!   | #NUM!    | 2 | 2 | BLCA | 47   | 0 | NA   | NA   |
| TCGA-ZF-A9RE | #####   | #####   | #####    | 2 | 2 | BLCA | 3    | 1 | NA   | NA   |
| TCGA-DK-A6AV | #####   | #####   | #####    | 2 | 2 | BLCA | 53   | 0 | NA   | NA   |
| TCGA-XF-A8HB | #####   | #NUM!   | #NUM!    | 2 | 2 | BLCA | 45   | 0 | NA   | NA   |
| TCGA-YF-AA3M | #####   | #####   | #####    | 2 | 2 | BLCA | 14   | 0 | NA   | NA   |
| TCGA-E7-A5KE | #####   | #####   | #NUM!    | 2 | 2 | BLCA | 1    | 0 | NA   | NA   |
| TCGA-E7-A6MF | #####   | #####   | #NUM!    | 2 | 2 | BLCA | 25   | 0 | NA   | NA   |
| TCGA-CF-A3MF | #####   | #####   | #NUM!    | 2 | 2 | BLCA | 13   | 0 | 47   | 8    |
| TCGA-E5-A2PC | #####   | #NUM!   | #NUM!    | 2 | 2 | BLCA | 44   | 0 | 196  | 46   |
| TCGA-BT-A20V | #####   | #####   | #####    | 2 | 2 | BLCA | 5    | 1 | NA   | 16   |
| TCGA-DK-A6B6 | #####   | #####   | #####    | 2 | 2 | BLCA | 37   | 0 | NA   | NA   |
| TCGA-CF-A3MI | #####   | #####   | #####    | 2 | 2 | BLCA | 12   | 0 | 63   | 11   |

|              |       |       |       |   |   |      |    |   |     |     |
|--------------|-------|-------|-------|---|---|------|----|---|-----|-----|
| TCGA-C4-A0F6 | ##### | ##### | ##### | 2 | 2 | BLCA | 23 | 0 | 188 | 24  |
| TCGA-DK-AA6U | ##### | ##### | #NUM! | 2 | 2 | BLCA | 19 | 0 | NA  | NA  |
| TCGA-ZF-AA4N | ##### | ##### | ##### | 2 | 2 | BLCA | 3  | 1 | NA  | NA  |
| TCGA-BT-A20X | ##### | ##### | ##### | 2 | 2 | BLCA | 8  | 1 | NA  | 13  |
| TCGA-K4-A6ME | ##### | ##### | ##### | 2 | 2 | BLCA | 15 | 0 | NA  | NA  |
| TCGA-SY-A9G0 | ##### | ##### | ##### | 2 | 2 | BLCA | 33 | 1 | NA  | NA  |
| TCGA-GU-A42P | ##### | ##### | ##### | 2 | 2 | BLCA | 11 | 1 | NA  | NA  |
| TCGA-FD-A62O | ##### | ##### | ##### | 2 | 2 | BLCA | 7  | 1 | NA  | NA  |
| TCGA-G2-A2EO | ##### | ##### | ##### | 2 | 2 | BLCA | 59 | 1 | 736 | 179 |
| TCGA-K4-A83P | ##### | ##### | ##### | 2 | 2 | BLCA | 16 | 0 | NA  | NA  |
| TCGA-S5-A6DX | ##### | ##### | ##### | 2 | 2 | BLCA | 2  | 1 | NA  | NA  |
| TCGA-CF-A9FL | ##### | ##### | ##### | 2 | 2 | BLCA | 19 | 1 | NA  | NA  |
| TCGA-E7-A6ME | ##### | ##### | ##### | 2 | 2 | BLCA | 24 | 0 | NA  | NA  |
| TCGA-FD-A43U | ##### | ##### | ##### | 2 | 2 | BLCA | 21 | 0 | NA  | NA  |
| TCGA-DK-A2HX | ##### | ##### | ##### | 2 | 2 | BLCA | 47 | 1 | 112 | 20  |
| TCGA-XF-A8HC | ##### | ##### | ##### | 2 | 2 | BLCA | 7  | 1 | NA  | NA  |
| TCGA-ZF-A9R7 | ##### | ##### | ##### | 2 | 2 | BLCA | 22 | 0 | NA  | NA  |
| TCGA-C4-A0F7 | ##### | ##### | ##### | 2 | 2 | BLCA | 2  | 1 | 64  | 15  |
| TCGA-FD-A43S | ##### | ##### | ##### | 2 | 2 | BLCA | 15 | 0 | NA  | NA  |
| TCGA-XF-AAMT | ##### | ##### | ##### | 2 | 2 | BLCA | 3  | 1 | NA  | NA  |
| TCGA-GC-A6I1 | ##### | ##### | ##### | 2 | 2 | BLCA | 9  | 1 | NA  | NA  |
| TCGA-K4-A6FZ | ##### | ##### | ##### | 2 | 2 | BLCA | 2  | 0 | NA  | NA  |
| TCGA-FD-A3B4 | ##### | ##### | ##### | 2 | 2 | BLCA | 17 | 1 | NA  | 10  |
| TCGA-XF-A9T4 | ##### | ##### | ##### | 2 | 2 | BLCA | 16 | 1 | NA  | NA  |
| TCGA-ZF-AA4V | ##### | ##### | ##### | 2 | 2 | BLCA | 59 | 0 | NA  | NA  |
| TCGA-ZF-AA5P | ##### | ##### | ##### | 2 | 2 | BLCA | 12 | 0 | NA  | NA  |
| TCGA-XF-A9SM | ##### | ##### | ##### | 2 | 2 | BLCA | 34 | 0 | NA  | NA  |
| TCGA-4Z-AA7N | ##### | ##### | ##### | 2 | 2 | BLCA | 45 | 1 | NA  | NA  |
| TCGA-FD-A5BT | ##### | ##### | ##### | 2 | 2 | BLCA | 11 | 1 | NA  | NA  |
| TCGA-GD-A3OF | ##### | ##### | ##### | 2 | 2 | BLCA | 2  | 0 | 326 | 76  |
| TCGA-DK-A2I2 | ##### | ##### | ##### | 2 | 2 | BLCA | 8  | 1 | 102 | 19  |
| TCGA-XF-A9SL | ##### | ##### | ##### | 2 | 2 | BLCA | 66 | 1 | NA  | NA  |
| TCGA-DK-A1AF | ##### | ##### | ##### | 2 | 2 | BLCA | 18 | 0 | 116 | 16  |
| TCGA-CF-A1HR | ##### | ##### | ##### | 2 | 2 | BLCA | 13 | 0 | 266 | 45  |
| TCGA-XF-AAMC | ##### | ##### | ##### | 2 | 2 | BLCA | 72 | 0 | NA  | NA  |
| TCGA-GU-AATC | ##### | ##### | ##### | 2 | 2 | BLCA | 11 | 1 | NA  | NA  |
| TCGA-XF-A9SW | ##### | ##### | ##### | 2 | 2 | BLCA | 12 | 1 | NA  | NA  |
| TCGA-E7-A541 | ##### | ##### | ##### | 2 | 2 | BLCA | 26 | 1 | NA  | NA  |
| TCGA-4Z-AA82 | ##### | ##### | ##### | 2 | 2 | BLCA | 51 | 1 | NA  | NA  |
| TCGA-DK-A6B2 | ##### | ##### | ##### | 2 | 2 | BLCA | 16 | 0 | NA  | NA  |
| TCGA-XF-A8HD | ##### | ##### | ##### | 2 | 2 | BLCA | 97 | 0 | NA  | NA  |
| TCGA-DK-AA6X | ##### | ##### | ##### | 2 | 2 | BLCA | 15 | 0 | NA  | NA  |
| TCGA-BT-A42E | ##### | ##### | ##### | 2 | 2 | BLCA | 36 | 0 | NA  | NA  |
| TCGA-FD-A62P | ##### | ##### | ##### | 2 | 2 | BLCA | 6  | 1 | NA  | NA  |
| TCGA-FJ-A3Z7 | ##### | ##### | ##### | 2 | 2 | BLCA | 31 | 0 | 287 | 71  |
| TCGA-XF-AAN7 | ##### | ##### | ##### | 2 | 2 | BLCA | 19 | 1 | NA  | NA  |
| TCGA-DK-A3IQ | ##### | ##### | ##### | 2 | 2 | BLCA | 18 | 1 | 181 | 26  |
| TCGA-DK-AA74 | ##### | ##### | ##### | 2 | 2 | BLCA | 56 | 0 | NA  | NA  |
| TCGA-GV-A40E | ##### | ##### | ##### | 2 | 2 | BLCA | 9  | 1 | 159 | 30  |
| TCGA-XF-A9SP | ##### | ##### | ##### | 2 | 2 | BLCA | 15 | 1 | NA  | NA  |
| TCGA-XF-AAMJ | ##### | ##### | ##### | 2 | 2 | BLCA | 55 | 1 | NA  | NA  |
| TCGA-G2-AA3C | ##### | ##### | ##### | 2 | 2 | BLCA | 7  | 1 | NA  | NA  |
| TCGA-E7-A677 | ##### | ##### | ##### | 2 | 2 | BLCA | 27 | 0 | NA  | NA  |
| TCGA-FD-A3B3 | ##### | ##### | ##### | 2 | 2 | BLCA | 32 | 1 | 156 | 22  |

|              |       |       |       |   |   |      |     |   |      |      |
|--------------|-------|-------|-------|---|---|------|-----|---|------|------|
| TCGA-ZF-A9RL | ##### | ##### | ##### | 2 | 2 | BLCA | 89  | 0 | NA   | NA   |
| TCGA-FD-A6TD | ##### | ##### | ##### | 2 | 2 | BLCA | 13  | 1 | NA   | NA   |
| TCGA-DK-A3Wx | ##### | ##### | ##### | 2 | 2 | BLCA | 11  | 1 | 35   | 16   |
| TCGA-FD-A6TI | ##### | ##### | ##### | 2 | 2 | BLCA | 10  | 1 | NA   | NA   |
| TCGA-XF-AAME | ##### | ##### | ##### | 2 | 2 | BLCA | 93  | 1 | NA   | NA   |
| TCGA-K4-A5RH | ##### | ##### | ##### | 2 | 2 | BLCA | 9   | 0 | NA   | NA   |
| TCGA-XF-AAN4 | ##### | ##### | ##### | 2 | 2 | BLCA | 27  | 1 | NA   | NA   |
| TCGA-BL-A5ZZ | ##### | ##### | ##### | 2 | 2 | BLCA | 12  | 0 | NA   | NA   |
| TCGA-4Z-AA84 | ##### | ##### | ##### | 2 | 2 | BLCA | 15  | 0 | NA   | NA   |
| TCGA-UY-A78N | ##### | ##### | ##### | 2 | 2 | BLCA | 87  | 1 | NA   | NA   |
| TCGA-BL-A3JM | ##### | ##### | ##### | 2 | 2 | BLCA | 7   | 1 | 173  | 27   |
| TCGA-FD-A3B7 | ##### | ##### | ##### | 2 | 2 | BLCA | 4   | 1 | 71   | 11   |
| TCGA-FD-A3SL | ##### | ##### | ##### | 2 | 2 | BLCA | 23  | 1 | 190  | 25   |
| TCGA-DK-A3IU | ##### | ##### | ##### | 2 | 2 | BLCA | 23  | 1 | 367  | 58   |
| TCGA-FD-A6TA | ##### | ##### | ##### | 2 | 2 | BLCA | 63  | 0 | NA   | NA   |
| TCGA-DK-A3IV | ##### | ##### | ##### | 2 | 2 | BLCA | 10  | 1 | 95   | 13   |
| TCGA-MV-A51V | ##### | ##### | ##### | 2 | 2 | BLCA | 13  | 0 | NA   | NA   |
| TCGA-FD-A6TK | ##### | ##### | ##### | 2 | 2 | BLCA | 11  | 0 | NA   | NA   |
| TCGA-K4-A4AC | ##### | ##### | ##### | 2 | 2 | BLCA | 9   | 1 | NA   | NA   |
| TCGA-ZF-AA4T | ##### | ##### | ##### | 2 | 2 | BLCA | 20  | 1 | NA   | NA   |
| TCGA-HQ-A5NE | ##### | ##### | ##### | 2 | 2 | BLCA | 12  | 1 | NA   | NA   |
| TCGA-XF-A9SX | ##### | ##### | ##### | 2 | 2 | BLCA | 24  | 1 | NA   | NA   |
| TCGA-FD-A43N | ##### | ##### | ##### | 2 | 2 | BLCA | 23  | 0 | NA   | NA   |
| TCGA-FD-A6TH | ##### | ##### | ##### | 2 | 2 | BLCA | 4   | 1 | NA   | NA   |
| TCGA-K4-A3WS | ##### | ##### | ##### | 2 | 2 | BLCA | 25  | 0 | 257  | 64   |
| TCGA-FD-A3B6 | ##### | ##### | ##### | 2 | 2 | BLCA | 33  | 1 | 242  | 51   |
| TCGA-XF-AAN5 | ##### | ##### | ##### | 2 | 2 | BLCA | 75  | 0 | NA   | NA   |
| TCGA-ZF-AA58 | ##### | ##### | ##### | 2 | 2 | BLCA | 54  | 0 | NA   | NA   |
| TCGA-BL-A0C8 | ##### | ##### | ##### | 2 | 2 | BLCA | 40  | 0 | 124  | 28   |
| TCGA-XF-AAMH | ##### | ##### | ##### | 2 | 2 | BLCA | 11  | 1 | NA   | NA   |
| TCGA-UY-A78K | ##### | ##### | ##### | 2 | 2 | BLCA | 18  | 1 | NA   | NA   |
| TCGA-FD-A3B8 | ##### | ##### | ##### | 2 | 2 | BLCA | 13  | 0 | 64   | 10   |
| TCGA-K4-AAQC | ##### | ##### | ##### | 2 | 2 | BLCA | 12  | 0 | NA   | NA   |
| TCGA-K4-A54R | ##### | ##### | ##### | 2 | 2 | BLCA | 28  | 0 | NA   | NA   |
| TCGA-ZF-A9R9 | ##### | ##### | ##### | 2 | 2 | BLCA | 28  | 1 | NA   | NA   |
| TCGA-BT-A2LD | ##### | ##### | ##### | 2 | 2 | BLCA | 20  | 1 | 97   | 19   |
| TCGA-CU-A0YC | ##### | ##### | ##### | 2 | 2 | BLCA | 5   | 1 | 101  | 15   |
| TCGA-GU-A762 | ##### | ##### | ##### | 2 | 2 | BLCA | 8   | 1 | NA   | NA   |
| TCGA-G2-A2EF | ##### | ##### | ##### | 2 | 2 | BLCA | 62  | 0 | 232  | 46   |
| TCGA-FD-A62S | ##### | ##### | ##### | 2 | 2 | BLCA | 13  | 1 | NA   | NA   |
| TCGA-G2-A2EC | ##### | ##### | ##### | 2 | 2 | BLCA | 23  | 1 | 162  | 27   |
| TCGA-GU-A766 | ##### | ##### | ##### | 2 | 2 | BLCA | 16  | 0 | NA   | NA   |
| TCGA-ZF-A9RF | ##### | ##### | ##### | 2 | 2 | BLCA | 64  | 0 | NA   | NA   |
| TCGA-XF-AAN8 | ##### | ##### | ##### | 2 | 2 | BLCA | 4   | 1 | #N/A | #N/A |
| TCGA-G2-A2EL | ##### | ##### | ##### | 2 | 2 | BLCA | 27  | 1 | NA   | 48   |
| TCGA-KQ-A41S | ##### | ##### | ##### | 2 | 2 | BLCA | 1   | 0 | NA   | NA   |
| TCGA-UY-A9PB | ##### | ##### | ##### | 2 | 2 | BLCA | 30  | 0 | NA   | NA   |
| TCGA-H4-A2HC | ##### | ##### | ##### | 2 | 2 | BLCA | 2   | 0 | 84   | 20   |
| TCGA-FD-A62N | ##### | ##### | ##### | 2 | 2 | BLCA | 3   | 0 | NA   | NA   |
| TCGA-DK-A3WY | ##### | ##### | ##### | 2 | 2 | BLCA | 163 | 0 | 13   | 0    |
| TCGA-XF-A9SI | ##### | ##### | ##### | 2 | 2 | BLCA | 80  | 0 | NA   | NA   |
| TCGA-FD-A6TF | ##### | ##### | ##### | 2 | 2 | BLCA | 2   | 1 | NA   | NA   |
| TCGA-BT-A3PJ | ##### | ##### | ##### | 2 | 2 | BLCA | 26  | 0 | 416  | 105  |
| TCGA-ZF-AA52 | ##### | ##### | ##### | 2 | 2 | BLCA | 35  | 1 | NA   | NA   |

|              |          |          |          |   |   |      |       |     |      |     |
|--------------|----------|----------|----------|---|---|------|-------|-----|------|-----|
| TCGA-FD-A5BZ | #####    | #####    | #####    | 2 | 2 | BLCA | 27    | 1   | NA   | NA  |
| TCGA-FD-A5BX | #####    | #####    | #####    | 2 | 2 | BLCA | 6     | 1   | NA   | NA  |
| TCGA-ZF-AA5H | #####    | #####    | #####    | 2 | 2 | BLCA | 29    | 0   | NA   | NA  |
| TCGA-DK-A1AC | #####    | #####    | #####    | 2 | 2 | BLCA | 131   | 0   | 1221 | 257 |
| TCGA-XF-A9ST | #####    | #####    | #####    | 2 | 2 | BLCA | 4     | 1   | NA   | NA  |
| TCGA-4Z-AA86 | #####    | #####    | #####    | 2 | 2 | BLCA | 10    | 1   | NA   | NA  |
| TCGA-DK-A1A3 | #####    | #####    | #####    | 2 | 2 | BLCA | 22    | 1   | 542  | 129 |
| TCGA-XF-AAN0 | #####    | #####    | #####    | 2 | 2 | BLCA | 56    | 1   | NA   | NA  |
| TCGA-GU-A764 | #####    | #####    | #####    | 2 | 2 | BLCA | 20    | 0   | NA   | NA  |
| TCGA-FD-A3SP | #####    | #####    | #####    | 2 | 2 | BLCA | 26    | 0   | 102  | 22  |
| TCGA-GV-A3JX | #####    | #####    | #####    | 2 | 2 | BLCA | 19    | 0   | 279  | 56  |
| TCGA-DK-AA6S | #####    | #####    | #####    | 2 | 2 | BLCA | 166   | 0   | NA   | NA  |
| TCGA-DK-A1AD | #####    | #####    | #####    | 2 | 2 | BLCA | 112   | 0   | 208  | 38  |
| TCGA-XF-A9T2 | #####    | #####    | #####    | 2 | 2 | BLCA | 19    | 1   | NA   | NA  |
| TCGA-BT-A20R | #####    | #####    | #####    | 2 | 2 | BLCA | 5     | 1   | 260  | 55  |
| TCGA-5N-A9KI | #####    | #####    | #####    | 2 | 2 | BLCA | 3     | 1   | NA   | NA  |
| TCGA-XF-A8HG | #####    | #####    | #####    | 2 | 2 | BLCA | 15    | 1   | NA   | NA  |
| TCGA-FD-A3SS | #####    | #####    | #####    | 2 | 2 | BLCA | 13    | 1   | 383  | 85  |
| TCGA-FD-A5BS | #####    | #####    | #####    | 2 | 2 | BLCA | 54    | 0   | NA   | NA  |
| TCGA-DK-A3IL | #####    | #####    | #####    | 2 | 2 | BLCA | 14    | 1   | 170  | 28  |
| TCGA-FD-A6TB | #####    | #####    | #####    | 2 | 2 | BLCA | 19    | 0   | NA   | NA  |
| TCGA-BT-A20J | #####    | #####    | #####    | 2 | 2 | BLCA | 19    | 1   | 417  | 110 |
| TCGA-EJ-AB20 | 8.069011 | 3.835611 | 5.058013 | 2 | 2 | PRAD | 4.30  | 0.0 | NA   | NA  |
| TCGA-YL-A8SB | 8.120680 | 1.851559 | 4.579470 | 2 | 2 | PRAD | 56.47 | 0.0 | NA   | NA  |
| TCGA-HI-7169 | 7.814206 | 4.279286 | 4.574737 | 2 | 2 | PRAD | 88.17 | 0.0 | 43   | 9   |
| TCGA-YL-A8HJ | 7.886412 | 3.833528 | 3.833528 | 2 | 2 | PRAD | 52.92 | 0.0 | NA   | NA  |
| TCGA-VN-A88I | 7.848371 | 3.200911 | 3.660347 | 2 | 2 | PRAD | 8.84  | 0.0 | NA   | NA  |
| TCGA-G9-7523 | 7.893779 | 2.767144 | 3.648500 | 2 | 2 | PRAD | 28.15 | 0.0 | 49   | 12  |
| TCGA-ZG-A9L6 | 7.727475 | 2.135860 | 3.425352 | 2 | 2 | PRAD | 22.57 | 0.0 | NA   | NA  |
| TCGA-G9-6353 | 7.840704 | 3.208765 | 3.372256 | 2 | 2 | PRAD | 50.66 | 0.0 | 28   | 8   |
| TCGA-EJ-7792 | 7.885555 | 3.597340 | 3.245859 | 2 | 2 | PRAD | 45.86 | 0.0 | 31   | 1   |
| TCGA-EJ-A7NH | 7.718729 | 1.690819 | 3.150249 | 2 | 2 | PRAD | 15.57 | 0.0 | NA   | NA  |
| TCGA-G9-6370 | 7.844514 | 2.407108 | 3.144077 | 2 | 2 | PRAD | 37.98 | 0.0 | 5    | 1   |
| TCGA-XJ-A9DQ | 7.963737 | 1.742524 | 2.990465 | 2 | 2 | PRAD | 2.99  | 0.0 | NA   | NA  |
| TCGA-YL-A9WK | 7.625056 | 1.193646 | 2.959175 | 2 | 2 | PRAD | 70.17 | 0.0 | NA   | NA  |
| TCGA-FC-7708 | 7.649426 | 1.779466 | 2.916954 | 2 | 2 | PRAD | 28.38 | 0.0 | 37   | 7   |
| TCGA-J4-A6M7 | 7.614578 | 1.710614 | 2.862608 | 2 | 2 | PRAD | 16.82 | 0.0 | 20   | 1   |
| TCGA-EJ-A46D | 7.634577 | 2.220946 | 2.805912 | 2 | 2 | PRAD | 20.57 | 0.0 | 15   | 6   |
| TCGA-CH-5738 | 7.809539 | 2.498557 | 2.733029 | 2 | 2 | PRAD | 6.96  | 0.0 | 35   | 5   |
| TCGA-V1-A8MK | 7.674324 | 1.961623 | 2.698574 | 2 | 2 | PRAD | 16.69 | 0.0 | NA   | NA  |
| TCGA-J4-A83L | 7.833198 | 2.283596 | 2.670614 | 2 | 2 | PRAD | 23.65 | 0.0 | NA   | NA  |
| TCGA-EJ-A46B | 7.698623 | 2.740971 | 2.615437 | 2 | 2 | PRAD | 21.58 | 0.0 | 5    | 2   |
| TCGA-EJ-A8FU | 7.698960 | 2.100036 | 2.559489 | 2 | 2 | PRAD | 4.53  | 0.0 | NA   | NA  |
| TCGA-FC-7961 | 7.721021 | 2.020840 | 2.551341 | 2 | 2 | PRAD | 15.41 | 0.0 | 59   | 20  |
| TCGA-V1-A8X3 | 7.980430 | 1.700173 | 2.507513 | 2 | 2 | PRAD | 6.64  | 0.0 | NA   | NA  |
| TCGA-J4-A6G1 | 7.630757 | 2.540176 | 2.161662 | 2 | 2 | PRAD | 25.26 | 0.0 | 18   | 4   |
| TCGA-J4-A83K | 7.683826 | 1.482069 | 2.067050 | 2 | 2 | PRAD | 10.78 | 0.0 | NA   | NA  |
| TCGA-EJ-7785 | 8.202962 | 2.238267 | 2.057689 | 2 | 2 | PRAD | 38.67 | 0.0 | 47   | 5   |
| TCGA-EJ-5497 | 7.922439 | 2.468062 | 1.937529 | 2 | 2 | PRAD | 13.30 | 0.0 | 33   | 5   |
| TCGA-EJ-5530 | 7.738900 | 1.589567 | 1.937495 | 2 | 2 | PRAD | 60.18 | 0.0 | 65   | 15  |
| TCGA-VP-A87C | 7.755724 | 3.104555 | 1.882173 | 2 | 2 | PRAD | 55.52 | 0.0 | NA   | NA  |
| TCGA-EJ-A6RC | 7.735401 | 2.711735 | 1.794183 | 2 | 2 | PRAD | 28.68 | 0.0 | NA   | NA  |
| TCGA-EJ-A8FP | 7.776780 | 1.535401 | 1.757791 | 2 | 2 | PRAD | 9.82  | 0.0 | NA   | NA  |
| TCGA-HC-8260 | 7.859797 | 1.140124 | 1.654710 | 2 | 2 | PRAD | 22.54 | 0.0 | 16   | 6   |

|              |          |           |           |   |   |      |       |     |     |     |
|--------------|----------|-----------|-----------|---|---|------|-------|-----|-----|-----|
| TCGA-G9-6384 | 7.752237 | 1.937118  | 1.558611  | 2 | 2 | PRAD | 25.13 | 0.0 | 51  | 5   |
| TCGA-HC-7748 | 7.923143 | 2.251265  | 1.540771  | 2 | 2 | PRAD | 26.02 | 0.0 | 24  | 6   |
| TCGA-HC-7820 | 7.686029 | 1.113627  | 1.528671  | 2 | 2 | PRAD | 24.54 | 0.0 | 81  | 7   |
| TCGA-EJ-5503 | 7.697670 | 2.318490  | 1.511164  | 2 | 2 | PRAD | 45.70 | 0.0 | 24  | 3   |
| TCGA-HC-7079 | 8.502683 | 3.142136  | 1.490057  | 2 | 2 | PRAD | 38.90 | 0.0 | 6   | 0   |
| TCGA-EJ-7115 | 7.581189 | 2.554979  | 1.455434  | 2 | 2 | PRAD | 88.27 | 0.0 | 57  | 10  |
| TCGA-J4-A83I | 7.650790 | 1.524415  | 1.331763  | 2 | 2 | PRAD | 22.50 | 0.0 | NA  | NA  |
| TCGA-CH-5764 | 7.652995 | 1.705226  | 1.290188  | 2 | 2 | PRAD | 1.02  | 0.0 | 51  | 9   |
| TCGA-EJ-7327 | 7.691670 | 2.187039  | 1.280184  | 2 | 2 | PRAD | 30.32 | 0.0 | 42  | 2   |
| TCGA-EJ-5512 | 7.618915 | 1.987685  | 1.180339  | 2 | 2 | PRAD | 56.93 | 0.0 | 28  | 3   |
| TCGA-EJ-5508 | 7.712325 | 1.344488  | 1.022538  | 2 | 2 | PRAD | 64.55 | 0.0 | 43  | 10  |
| TCGA-EJ-7328 | 7.743658 | 2.391988  | 1.013498  | 2 | 2 | PRAD | 27.66 | 0.0 | 69  | 11  |
| TCGA-M7-A720 | 7.657714 | 1.434401  | 0.948975  | 2 | 2 | PRAD | 12.61 | 0.0 | NA  | NA  |
| TCGA-HC-7818 | 7.676806 | 2.208046  | 0.722632  | 2 | 2 | PRAD | 30.81 | 0.0 | 38  | 5   |
| TCGA-EJ-5531 | 7.718003 | 1.873892  | 0.703987  | 2 | 2 | PRAD | 41.82 | 0.0 | 53  | 6   |
| TCGA-HC-7745 | 7.789646 | 2.117928  | 0.532965  | 2 | 2 | PRAD | 23.69 | 0.0 | 86  | 3   |
| TCGA-EJ-7782 | 8.005374 | 1.417159  | 0.247198  | 2 | 2 | PRAD | 38.34 | 0.0 | 614 | 116 |
| TCGA-YL-A9WJ | 7.421041 | 0.942083  | 0.205142  | 2 | 2 | PRAD | 60.94 | 1.0 | NA  | NA  |
| TCGA-VN-A88R | 6.721911 | #NUM!     | 0.190552  | 2 | 2 | PRAD | 25.76 | 0.0 | NA  | NA  |
| TCGA-CH-5791 | 7.075041 | 0.773659  | 0.188768  | 2 | 2 | PRAD | 32.98 | 0.0 | 39  | 1   |
| TCGA-VP-A875 | 7.394447 | 0.130799  | 0.130799  | 2 | 2 | PRAD | 75.85 | 0.0 | NA  | NA  |
| TCGA-KC-A4BN | 7.024497 | 0.708585  | 0.123653  | 2 | 2 | PRAD | 59.63 | 0.0 | 32  | 6   |
| TCGA-YL-A8SH | 6.949589 | 1.080105  | 0.080098  | 2 | 2 | PRAD | 28.75 | 1.0 | NA  | NA  |
| TCGA-CH-5765 | 7.164474 | -0.515006 | 0.069977  | 2 | 2 | PRAD | 23.00 | 0.0 | 40  | 13  |
| TCGA-HC-8259 | 7.527307 | 1.027649  | 0.027720  | 2 | 2 | PRAD | 30.35 | 0.0 | 64  | 14  |
| TCGA-EJ-5514 | 6.931446 | 1.009276  | 0.009347  | 2 | 2 | PRAD | 60.09 | 0.0 | 37  | 9   |
| TCGA-XK-AAJA | 7.091039 | 0.652133  | -0.084839 | 2 | 2 | PRAD | 30.55 | 0.0 | NA  | NA  |
| TCGA-XK-AAK1 | 7.066311 | #NUM!     | -0.093571 | 2 | 2 | PRAD | 32.16 | 0.0 | NA  | NA  |
| TCGA-CH-5744 | 7.508944 | -0.528032 | -0.113114 | 2 | 2 | PRAD | 1.97  | 0.0 | 32  | 8   |
| TCGA-CH-5753 | 7.552193 | -0.116692 | -0.116692 | 2 | 2 | PRAD | 1.02  | 0.0 | 50  | 5   |
| TCGA-2A-AAYU | 7.468982 | 0.344374  | -0.240588 | 2 | 2 | PRAD | 20.20 | 0.0 | NA  | NA  |
| TCGA-ZG-A9L5 | 7.170983 | -1.828844 | -0.244002 | 2 | 2 | PRAD | 29.83 | 0.0 | NA  | NA  |
| TCGA-EJ-5519 | 6.867439 | -0.275088 | -0.275088 | 2 | 2 | PRAD | 64.45 | 0.0 | 88  | 30  |
| TCGA-G9-A9S7 | 7.070340 | 0.708399  | -0.291610 | 2 | 2 | PRAD | 23.92 | 0.0 | NA  | NA  |
| TCGA-YL-A9WH | 6.874443 | -1.330248 | -0.330084 | 2 | 2 | PRAD | 14.03 | 0.0 | NA  | NA  |
| TCGA-KK-A7AZ | 6.375917 | #NUM!     | -0.331536 | 2 | 2 | PRAD | 49.90 | 0.0 | NA  | NA  |
| TCGA-HC-8256 | 7.017005 | -0.336063 | -0.336063 | 2 | 2 | PRAD | 28.25 | 0.0 | 36  | 3   |
| TCGA-EJ-5507 | 7.159621 | 0.909428  | -0.412558 | 2 | 2 | PRAD | 47.86 | 0.0 | 36  | 4   |
| TCGA-G9-6496 | 6.277728 | -0.477141 | -0.477141 | 2 | 2 | PRAD | 56.70 | 0.0 | 64  | 9   |
| TCGA-YL-A8SC | 7.208597 | 0.501210  | -0.498790 | 2 | 2 | PRAD | 41.43 | 0.0 | NA  | NA  |
| TCGA-KK-A7B4 | 6.978688 | 0.439570  | -0.560430 | 2 | 2 | PRAD | 32.42 | 0.0 | NA  | NA  |
| TCGA-HC-7232 | 6.686701 | -1.598195 | -0.597955 | 2 | 2 | PRAD | 38.14 | 0.0 | 40  | 2   |
| TCGA-G9-A9S0 | 7.034540 | 0.391218  | -0.608914 | 2 | 2 | PRAD | 25.99 | 1.0 | NA  | NA  |
| TCGA-FC-A6HD | 6.013201 | 0.355005  | -0.645006 | 2 | 2 | PRAD | 25.92 | 0.0 | 29  | 8   |
| TCGA-J4-AATZ | 6.647479 | #NUM!     | -0.678765 | 2 | 2 | PRAD | 13.53 | 0.0 | NA  | NA  |
| TCGA-HC-7077 | 7.555282 | -0.687800 | -0.687800 | 2 | 2 | PRAD | 69.48 | 0.0 | 49  | 10  |
| TCGA-XJ-A83F | 7.116766 | 0.837532  | -0.747342 | 2 | 2 | PRAD | 37.02 | 0.0 | NA  | NA  |
| TCGA-KK-A59X | 6.607468 | 1.083928  | -0.916208 | 2 | 2 | PRAD | 83.28 | 0.0 | 52  | 12  |
| TCGA-2A-A8VX | 6.486776 | 0.011066  | -0.989077 | 2 | 2 | PRAD | 45.27 | 0.0 | NA  | NA  |
| TCGA-KK-A6E8 | 6.053076 | 0.593688  | -0.991370 | 2 | 2 | PRAD | 58.15 | 0.0 | 46  | 15  |
| TCGA-HC-8213 | 7.552413 | -0.013625 | -1.013625 | 2 | 2 | PRAD | 19.35 | 0.0 | 22  | 3   |
| TCGA-YL-A9WI | 7.161265 | 0.976364  | -1.023563 | 2 | 2 | PRAD | 53.32 | 0.0 | NA  | NA  |
| TCGA-HC-A631 | 6.666383 | #NUM!     | -1.068272 | 2 | 2 | PRAD | 1.77  | 0.0 | 38  | 3   |
| TCGA-G9-6369 | 6.957173 | 0.929261  | -1.070663 | 2 | 2 | PRAD | 39.91 | 0.0 | 34  | 5   |



|              |          |           |           |   |   |      |       |     |      |      |
|--------------|----------|-----------|-----------|---|---|------|-------|-----|------|------|
| TCGA-2A-A8W1 | 6.685651 | #NUM!     | -1.082530 | 2 | 2 | PRAD | 3.68  | 0.0 | NA   | NA   |
| TCGA-FC-A5OB | 6.305533 | #NUM!     | -1.086814 | 2 | 2 | PRAD | 22.34 | 0.0 | 31   | 6    |
| TCGA-KK-A6E1 | 7.140613 | 0.888461  | -1.111570 | 2 | 2 | PRAD | 72.21 | 0.0 | 27   | 4    |
| TCGA-J9-A52D | 6.950447 | #NUM!     | -1.120953 | 2 | 2 | PRAD | 6.96  | 0.0 | 39   | NA   |
| TCGA-HI-7171 | 7.312688 | -0.553236 | -1.137965 | 2 | 2 | PRAD | 43.66 | 1.0 | 35   | 6    |
| TCGA-YL-A8SL | 7.369434 | -0.141955 | -1.141812 | 2 | 2 | PRAD | 32.42 | 0.0 | NA   | NA   |
| TCGA-VN-A88Q | 7.559649 | 0.440942  | -1.144010 | 2 | 2 | PRAD | 44.88 | 0.0 | NA   | NA   |
| TCGA-EJ-7789 | 6.790829 | 0.348799  | -1.236198 | 2 | 2 | PRAD | 36.30 | 0.0 | 68   | 14   |
| TCGA-YL-A8SP | 6.909127 | 0.759412  | -1.240588 | 2 | 2 | PRAD | 77.73 | 0.0 | NA   | NA   |
| TCGA-EJ-A65D | 6.661547 | -1.245369 | -1.245369 | 2 | 2 | PRAD | 12.91 | 0.0 | 37   | 10   |
| TCGA-HC-A48F | 6.655778 | -1.269199 | -1.269199 | 2 | 2 | PRAD | 22.34 | 0.0 | 20   | 2    |
| TCGA-CH-5737 | 6.971684 | -1.326986 | -1.326986 | 2 | 2 | PRAD | 2.99  | 0.0 | 84   | 8    |
| TCGA-KK-A7AP | 7.045570 | #NUM!     | -1.341903 | 2 | 2 | PRAD | 6.44  | 0.0 | NA   | NA   |
| TCGA-V1-A9OL | 6.873798 | -0.359027 | -1.358824 | 2 | 2 | PRAD | 62.84 | 0.0 | NA   | NA   |
| TCGA-M7-A724 | 6.192514 | #NUM!     | -1.362158 | 2 | 2 | PRAD | 29.20 | 0.0 | NA   | NA   |
| TCGA-EJ-A65J | 6.948371 | -1.381611 | -1.381611 | 2 | 2 | PRAD | 14.82 | 0.0 | 35   | 9    |
| TCGA-KK-A7AU | 7.048145 | -1.399007 | -1.399007 | 2 | 2 | PRAD | 58.31 | 0.0 | NA   | NA   |
| TCGA-VP-A87J | 6.939631 | 0.904041  | -1.417733 | 2 | 2 | PRAD | 58.28 | 0.0 | NA   | NA   |
| TCGA-2A-A8VT | 7.493031 | -0.443615 | -1.443831 | 2 | 2 | PRAD | 45.11 | 0.0 | NA   | NA   |
| TCGA-VP-A87K | 7.172480 | -1.463987 | -1.463987 | 2 | 2 | PRAD | 42.90 | 0.0 | NA   | NA   |
| TCGA-M7-A725 | 6.809746 | 0.077776  | -1.507173 | 2 | 2 | PRAD | 18.82 | 0.0 | NA   | NA   |
| TCGA-KK-A8II | 7.070141 | -1.515027 | -1.515027 | 2 | 2 | PRAD | ####  | 1.0 | NA   | NA   |
| TCGA-CH-5743 | 7.430792 | 1.050390  | -1.534496 | 2 | 2 | PRAD | 13.96 | 0.0 | #N/A | #N/A |
| TCGA-HC-8262 | 7.445218 | 0.395491  | -1.604279 | 2 | 2 | PRAD | 22.31 | 0.0 | 39   | 10   |
| TCGA-G9-6366 | 6.091778 | -0.642977 | -1.643000 | 2 | 2 | PRAD | 63.96 | 0.0 | 43   | 15   |
| TCGA-ZG-A9KY | 6.683506 | 0.630405  | -1.691569 | 2 | 2 | PRAD | 4.27  | 0.0 | NA   | NA   |
| TCGA-YL-A9WL | 7.404069 | -1.748069 | -1.748069 | 2 | 2 | PRAD | 24.31 | 0.0 | NA   | NA   |
| TCGA-YL-A8HL | 6.664269 | 1.067363  | #NUM!     | 2 | 2 | PRAD | 51.41 | 0.0 | NA   | NA   |
| TCGA-V1-A8WM | 7.330728 | 1.064607  | #NUM!     | 2 | 2 | PRAD | 35.41 | 0.0 | NA   | NA   |
| TCGA-YL-A8HM | 7.295226 | 1.051087  | #NUM!     | 2 | 2 | PRAD | 48.69 | 0.0 | NA   | NA   |
| TCGA-ZG-A8QV | 6.827538 | 0.897783  | #NUM!     | 2 | 2 | PRAD | 3.09  | 0.0 | NA   | NA   |
| TCGA-YL-A8SR | 7.073576 | 0.839960  | #NUM!     | 2 | 2 | PRAD | 8.97  | 0.0 | NA   | NA   |
| TCGA-CH-5761 | 6.544110 | 0.762731  | #NUM!     | 2 | 2 | PRAD | 0.92  | 0.0 | 59   | 17   |
| TCGA-KK-A8I5 | 7.062503 | 0.687509  | #NUM!     | 2 | 2 | PRAD | ####  | 0.0 | NA   | NA   |
| TCGA-KK-A6E7 | 7.136526 | 0.628727  | #NUM!     | 2 | 2 | PRAD | 90.67 | 0.0 | 31   | 8    |
| TCGA-CH-5767 | 6.841252 | 0.584289  | #NUM!     | 2 | 2 | PRAD | 15.05 | 0.0 | 46   | 18   |
| TCGA-CH-5788 | 7.545547 | 0.529071  | #NUM!     | 2 | 2 | PRAD | 26.97 | 0.0 | 52   | 11   |
| TCGA-YJ-A8SW | 6.489082 | 0.524866  | #NUM!     | 2 | 2 | PRAD | 4.86  | 0.0 | NA   | NA   |
| TCGA-XK-AAIW | 6.459113 | 0.470407  | #NUM!     | 2 | 2 | PRAD | 40.01 | 0.0 | NA   | NA   |
| TCGA-XQ-A8TA | 6.595004 | 0.315786  | #NUM!     | 2 | 2 | PRAD | 4.80  | 1.0 | NA   | NA   |
| TCGA-KK-A8ID | 6.632425 | 0.257855  | #NUM!     | 2 | 2 | PRAD | 69.22 | 0.0 | NA   | NA   |
| TCGA-QU-A6IN | 6.698800 | 0.128940  | #NUM!     | 2 | 2 | PRAD | ####  | 0.0 | 23   | 5    |
| TCGA-XK-AAJP | 6.979387 | 0.109294  | #NUM!     | 2 | 2 | PRAD | 41.36 | 0.0 | NA   | NA   |
| TCGA-HC-7736 | 7.157836 | 0.073272  | #NUM!     | 2 | 2 | PRAD | 36.24 | 0.0 | 26   | 7    |
| TCGA-CH-5766 | 7.445209 | 0.050467  | #NUM!     | 2 | 2 | PRAD | 1.02  | 0.0 | 35   | 4    |
| TCGA-ZG-A9N3 | 7.430646 | 0.038858  | #NUM!     | 2 | 2 | PRAD | 11.47 | 0.0 | NA   | NA   |
| TCGA-XJ-A9DX | 6.814254 | -0.024311 | #NUM!     | 2 | 2 | PRAD | 31.96 | 0.0 | NA   | NA   |
| TCGA-HC-7080 | 7.551266 | -0.210246 | #NUM!     | 2 | 2 | PRAD | 36.33 | 0.0 | 31   | 3    |
| TCGA-HC-7744 | 7.435834 | -0.471129 | #NUM!     | 2 | 2 | PRAD | 17.44 | 0.0 | 42   | 9    |
| TCGA-KK-A8IA | 6.805232 | -0.543509 | #NUM!     | 2 | 2 | PRAD | 63.44 | 0.0 | NA   | NA   |
| TCGA-KK-A8IF | 6.167117 | -0.625712 | #NUM!     | 2 | 2 | PRAD | 26.41 | 0.0 | NA   | NA   |
| TCGA-VP-A876 | 7.435318 | -0.849986 | #NUM!     | 2 | 2 | PRAD | ####  | 0.0 | NA   | NA   |
| TCGA-KK-A7AQ | 7.039110 | -0.861710 | #NUM!     | 2 | 2 | PRAD | 52.89 | 0.0 | NA   | NA   |
| TCGA-VN-A943 | 7.036728 | #NUM!     | #NUM!     | 2 | 2 | PRAD | 16.29 | 0.0 | NA   | NA   |

|              |          |          |           |   |   |      |       |     |      |      |
|--------------|----------|----------|-----------|---|---|------|-------|-----|------|------|
| TCGA-HC-7212 | 6.994110 | #NUM!    | #NUM!     | 2 | 2 | PRAD | 28.58 | 0.0 | 41   | 3    |
| TCGA-MG-AAMC | 6.978925 | #NUM!    | #NUM!     | 2 | 2 | PRAD | 5.68  | 0.0 | NA   | NA   |
| TCGA-YL-A8S9 | 6.955417 | #NUM!    | #NUM!     | 2 | 2 | PRAD | 60.51 | 0.0 | NA   | NA   |
| TCGA-TP-A8TV | 6.887793 | #NUM!    | #NUM!     | 2 | 2 | PRAD | 20.04 | 0.0 | NA   | NA   |
| TCGA-KC-A7F5 | 6.263421 | #NUM!    | #NUM!     | 2 | 2 | PRAD | 2.99  | 0.0 | NA   | NA   |
| TCGA-HZ-A49I | 10.1379  | 4.6924   | 3.5973    | 2 | 2 | PAAD | 10.12 | 1.0 | 47   | NA   |
| TCGA-HZ-8637 | 10.2391  | 4.6239   | 1.3570    | 2 | 2 | PAAD | 16.98 | 1.0 | 78   | NA   |
| TCGA-LB-A9Q5 | 9.9229   | 3.9569   | 3.8694    | 2 | 2 | PAAD | 10.28 | 1.0 | 70   | NA   |
| TCGA-3A-A9I7 | 9.8243   | 3.6155   | 2.4580    | 2 | 2 | PAAD | 43.46 | 0.0 | 38   | NA   |
| TCGA-FB-A7DR | 10.6809  | 3.5677   | 1.6746    | 2 | 2 | PAAD | 11.60 | 1.0 | NA   | NA   |
| TCGA-HZ-7924 | 9.8717   | 3.2058   | 1.5814    | 2 | 2 | PAAD | 27.60 | 0.0 | NA   | NA   |
| TCGA-IB-AAUU | 10.0073  | 3.0911   | 3.2286    | 2 | 2 | PAAD | 8.05  | 0.0 | 77   | NA   |
| TCGA-FB-A78T | 9.8735   | 3.0571   | 4.7124    | 2 | 2 | PAAD | 12.32 | 1.0 | 118  | NA   |
| TCGA-2J-AAB1 | 9.7502   | 2.8713   | 2.9644    | 2 | 2 | PAAD | 2.17  | 1.0 | 103  | NA   |
| TCGA-H8-A6C1 | 10.6940  | 2.6928   | 1.9152    | 2 | 2 | PAAD | 22.04 | 0.0 | NA   | NA   |
| TCGA-HZ-8005 | 9.2096   | 2.5939   | 0.7865    | 2 | 2 | PAAD | 3.94  | 1.0 | 111  | NA   |
| TCGA-IB-AAUQ | 8.9163   | 2.5210   | 0.9361    | 2 | 2 | PAAD | 6.01  | 1.0 | 70   | NA   |
| TCGA-HZ-7922 | 8.8052   | 2.4770   | #NUM!     | 2 | 2 | PAAD | 0.13  | 0.0 | 55   | NA   |
| TCGA-F2-7276 | 9.5740   | 2.4218   | 0.4218    | 2 | 2 | PAAD | 7.10  | 1.0 | NA   | NA   |
| TCGA-HV-A5A6 | 8.9624   | 2.4204   | -0.9016   | 2 | 2 | PAAD | 66.89 | 1.0 | 52   | NA   |
| TCGA-HZ-7919 | 9.5423   | 2.3644   | -0.3361   | 2 | 2 | PAAD | 19.48 | 1.0 | 70   | NA   |
| TCGA-3A-A9IU | 9.0718   | 2.2729   | #NUM!     | 2 | 2 | PAAD | 15.05 | 1.0 | 63   | NA   |
| TCGA-FB-AAQ2 | 8.1395   | 2.2183   | 0.4813    | 2 | 2 | PAAD | 5.03  | 1.0 | 60   | NA   |
| TCGA-FB-A545 | 9.2001   | 2.1833   | #NUM!     | 2 | 2 | PAAD | 24.05 | 1.0 | 47   | NA   |
| TCGA-F2-A8YN | 8.8370   | 2.0427   | #NUM!     | 2 | 2 | PAAD | 16.98 | 0.0 | 100  | NA   |
| TCGA-IB-8126 | 8.9787   | 2.0416   | -0.5433   | 2 | 2 | PAAD | 15.18 | 0.0 | 53   | NA   |
| TCGA-YH-A8SY | 9.4111   | 2.0317   | #NUM!     | 2 | 2 | PAAD | 12.75 | 0.0 | 77   | NA   |
| TCGA-IB-AAUO | 9.5957   | 1.9764   | 0.5613    | 2 | 2 | PAAD | 7.85  | 1.0 | 71   | NA   |
| TCGA-H6-8124 | 9.2026   | 1.7204   | -0.2796   | 2 | 2 | PAAD | 12.88 | 0.0 | 44   | NA   |
| TCGA-IB-A6UG | 8.2543   | 1.4244   | 0.6874    | 2 | 2 | PAAD | 1.35  | 1.0 | 113  | NA   |
| TCGA-IB-A7M4 | 8.7107   | 1.3426   | #NUM!     | 2 | 2 | PAAD | 15.87 | 0.0 | 89   | NA   |
| TCGA-3A-A9IV | 6.7511   | 1.1667   | #NUM!     | 2 | 2 | PAAD | 36.24 | 0.0 | NA   | NA   |
| TCGA-2J-AABU | 8.6052   | 1.1266   | 0.1266    | 2 | 2 | PAAD | 9.10  | 1.0 | 39   | NA   |
| TCGA-2J-AABI | 7.8108   | 1.1224   | 0.5374    | 2 | 2 | PAAD | 31.83 | 0.0 | NA   | NA   |
| TCGA-L1-A7W4 | 8.0494   | 1.0950   | -1.2270   | 2 | 2 | PAAD | 9.13  | 1.0 | NA   | NA   |
| TCGA-IB-7886 | 9.3442   | 0.9135   | #NUM!     | 2 | 2 | PAAD | 4.04  | 1.0 | 59   | NA   |
| TCGA-3A-A9IN | 7.2520   | 0.7925   | 0.7925    | 2 | 2 | PAAD | 68.46 | 0.0 | NA   | NA   |
| TCGA-IB-A7LX | 7.5841   | 0.4622   | -0.1228   | 2 | 2 | PAAD | 8.21  | 1.0 | 54   | NA   |
| TCGA-3A-A9IJ | 7.3841   | 0.0895   | #NUM!     | 2 | 2 | PAAD | 60.91 | 0.0 | NA   | NA   |
| TCGA-FB-AAQ6 | 9.6863   | -0.0908  | #NUM!     | 2 | 2 | PAAD | 8.02  | 1.0 | NA   | NA   |
| TCGA-F2-6879 | 8.5859   | -0.1789  | -1.7637   | 2 | 2 | PAAD | 10.97 | 1.0 | 82   | NA   |
| TCGA-YY-A8LH | 9.1564   | -0.1813  | -1.1811   | 2 | 2 | PAAD | 66.23 | 0.0 | 135  | NA   |
| TCGA-2L-AAQM | 7.0610   | -0.7527  | -0.7527   | 2 | 2 | PAAD | 45.43 | 0.0 | NA   | NA   |
| TCGA-3A-A9IO | 7.3250   | #NUM!    | -0.9509   | 2 | 2 | PAAD | 63.80 | 0.0 | NA   | NA   |
| TCGA-3A-A9IS | 6.6100   | #NUM!    | #NUM!     | 2 | 2 | PAAD | 32.79 | 0.0 | NA   | NA   |
| TCGA-FZ-5919 | #NUM!    | #NUM!    | #NUM!     | 2 | 2 | PAAD | 24.34 | 1.0 | #N/A | #N/A |
| TCGA-FZ-5921 | #NUM!    | #NUM!    | #NUM!     | 2 | 2 | PAAD | 5.09  | 1.0 | #N/A | #N/A |
| TCGA-FZ-5922 | #NUM!    | #NUM!    | #NUM!     | 2 | 2 | PAAD | 36.17 | 1.0 | #N/A | #N/A |
| TCGA-FZ-5920 | #NUM!    | #NUM!    | #NUM!     | 2 | 2 | PAAD | 2.00  | 1.0 | #N/A | #N/A |
| TCGA-FZ-5923 | #NUM!    | #NUM!    | #NUM!     | 2 | 2 | PAAD | 20.34 | 1.0 | #N/A | #N/A |
| TCGA-FZ-5924 | #NUM!    | #NUM!    | #NUM!     | 2 | 2 | PAAD | 15.77 | 1.0 | #N/A | #N/A |
| TCGA-FZ-5926 | #NUM!    | #NUM!    | #NUM!     | 2 | 2 | PAAD | 17.77 | 1.0 | #N/A | #N/A |
| TCGA-B1-5398 | 8.968930 | 8.057316 | 6.911775  | 2 | 2 | KIRP | 41    | 0.0 | NA   | 21   |
| TCGA-Y8-A8S1 | 8.602036 | 5.762500 | -0.485398 | 2 | 2 | KIRP | 13    | 0.0 | NA   | NA   |

|              |           |           |           |   |   |      |    |     |     |    |
|--------------|-----------|-----------|-----------|---|---|------|----|-----|-----|----|
| TCGA-B3-3925 | 9.236751  | 5.761453  | 3.078642  | 2 | 2 | KIRP | 34 | 0.0 | 15  | 24 |
| TCGA-G7-6790 | 9.679705  | 5.113667  | 4.661789  | 2 | 2 | KIRP | 52 | 0.0 | NA  | 12 |
| TCGA-BQ-5889 | 8.430020  | 4.787045  | 1.869516  | 2 | 2 | KIRP | 11 | 1.0 | 42  | 20 |
| TCGA-IZ-A6M8 | 8.488934  | 4.715668  | 1.600175  | 2 | 2 | KIRP | 16 | 0.0 | 87  | 6  |
| TCGA-B1-A47O | 9.342536  | 4.614456  | 2.334337  | 2 | 2 | KIRP | 28 | 0.0 | 65  | 8  |
| TCGA-UZ-A9PJ | 8.605020  | 4.552450  | -0.305610 | 2 | 2 | KIRP | 26 | 1.0 | NA  | NA |
| TCGA-B9-5156 | 8.836112  | 4.517326  | 2.932364  | 2 | 2 | KIRP | 44 | 0.0 | 36  | 23 |
| TCGA-V9-A7HT | 9.213999  | 4.236676  | 1.499731  | 2 | 2 | KIRP | 32 | 0.0 | NA  | NA |
| TCGA-5P-A9KA | 8.622226  | 4.077798  | 2.662773  | 2 | 2 | KIRP | 13 | 0.0 | NA  | NA |
| TCGA-A4-7584 | 8.233123  | 3.799626  | -1.200283 | 2 | 2 | KIRP | 21 | 0.0 | 113 | 16 |
| TCGA-5P-A9KF | 8.695960  | 3.792793  | -1.251539 | 2 | 2 | KIRP | 28 | 0.0 | 73  | NA |
| TCGA-B9-5155 | 8.301493  | 3.739719  | -0.652675 | 2 | 2 | KIRP | 22 | 0.0 | 81  | 23 |
| TCGA-BQ-5885 | 8.213962  | 3.593903  | 0.719403  | 2 | 2 | KIRP | 30 | 0.0 | 58  | 14 |
| TCGA-MH-A855 | 8.686372  | 3.404712  | 1.704297  | 2 | 2 | KIRP | 12 | 0.0 | NA  | NA |
| TCGA-B1-A47M | 8.608106  | 3.358451  | 0.899021  | 2 | 2 | KIRP | 22 | 0.0 | 78  | 29 |
| TCGA-UZ-A9PP | 8.543730  | 3.315813  | -0.591201 | 2 | 2 | KIRP | 99 | 0.0 | NA  | NA |
| TCGA-J7-8537 | 9.015246  | 3.299860  | -1.285249 | 2 | 2 | KIRP | 11 | 1.0 | 55  | 7  |
| TCGA-B3-8121 | 8.701387  | 3.298086  | 0.128161  | 2 | 2 | KIRP | 12 | 0.0 | NA  | 16 |
| TCGA-DZ-6132 | 8.570603  | 3.251083  | -0.655853 | 2 | 2 | KIRP | 81 | 0.0 | 83  | 31 |
| TCGA-2Z-A9JM | 9.250173  | 3.133596  | 0.548624  | 2 | 2 | KIRP | 31 | 0.0 | NA  | NA |
| TCGA-MH-A561 | 8.861508  | 3.132297  | -0.259996 | 2 | 2 | KIRP | 28 | 0.0 | 51  | 20 |
| TCGA-IA-A83W | 8.535297  | 3.018990  | 3.962410  | 2 | 2 | KIRP | 67 | 1.0 | 51  | NA |
| TCGA-UZ-A9PN | 8.402610  | 2.715212  | -0.454625 | 2 | 2 | KIRP | 37 | 1.0 | NA  | NA |
| TCGA-A4-7583 | 8.243464  | 2.655306  | -0.432085 | 2 | 2 | KIRP | 0  | 0.0 | 63  | 20 |
| TCGA-KV-A6GD | 8.563944  | 2.588564  | -0.996283 | 2 | 2 | KIRP | 18 | 0.0 | 54  | 28 |
| TCGA-2Z-A9JL | 9.085582  | 2.360533  | 0.623586  | 2 | 2 | KIRP | 33 | 0.0 | NA  | NA |
| TCGA-A4-A7UZ | 9.329238  | 1.913799  | 0.106482  | 2 | 2 | KIRP | 0  | 0.0 | 28  | NA |
| TCGA-5P-A9K6 | 8.602896  | 1.799667  | 0.799659  | 2 | 2 | KIRP | 63 | 0.0 | NA  | NA |
| TCGA-IA-A40Y | 9.139774  | 1.784630  | 0.784663  | 2 | 2 | KIRP | 2  | 0.0 | 127 | 19 |
| TCGA-BQ-5890 | 8.883786  | 1.760348  | 0.438399  | 2 | 2 | KIRP | 8  | 0.0 | 30  | 16 |
| TCGA-2Z-A9JK | 8.953611  | 1.709070  | -0.460965 | 2 | 2 | KIRP | 39 | 0.0 | NA  | NA |
| TCGA-SX-A7SN | 8.968088  | 1.664755  | -0.657218 | 2 | 2 | KIRP | 19 | 0.0 | NA  | NA |
| TCGA-BQ-7049 | 10.170357 | 1.630405  | 1.630405  | 2 | 2 | KIRP | 45 | 1.0 | 166 | 5  |
| TCGA-B1-A657 | 8.222332  | 1.494415  | -1.505533 | 2 | 2 | KIRP | 21 | 0.0 | 260 | 22 |
| TCGA-4A-A93W | 8.733092  | 1.408168  | 1.145156  | 2 | 2 | KIRP | 0  | 0.0 | NA  | NA |
| TCGA-B1-A47N | 8.504457  | 1.393306  | 2.393334  | 2 | 2 | KIRP | 36 | 0.0 | 35  | 7  |
| TCGA-B9-4117 | 8.328636  | 1.391218  | -0.416211 | 2 | 2 | KIRP | 0  | 0.0 | 54  | 27 |
| TCGA-EV-5901 | 9.593818  | 1.153157  | 1.983240  | 2 | 2 | KIRP | 34 | 0.0 | 80  | 13 |
| TCGA-G7-A8LE | 8.389291  | 1.080111  | 0.080098  | 2 | 2 | KIRP | 81 | 0.0 | 39  | NA |
| TCGA-B1-A654 | 8.754407  | 1.028428  | -0.971714 | 2 | 2 | KIRP | 20 | 0.0 | 84  | 21 |
| TCGA-5P-A9JZ | 8.289128  | 0.784503  | -1.537466 | 2 | 2 | KIRP | 90 | 0.0 | NA  | NA |
| TCGA-G7-7501 | 8.201484  | 0.732226  | -1.589876 | 2 | 2 | KIRP | 21 | 1.0 | NA  | 10 |
| TCGA-A4-7734 | 9.418551  | 0.665028  | -0.334989 | 2 | 2 | KIRP | 1  | 0.0 | 36  | 16 |
| TCGA-B9-4116 | 9.598974  | 0.643117  | 0.643117  | 2 | 2 | KIRP | 21 | 0.0 | 98  | 24 |
| TCGA-2Z-A9JG | 8.832146  | 0.492622  | -1.507583 | 2 | 2 | KIRP | 55 | 0.0 | NA  | NA |
| TCGA-5P-A9JV | 8.961869  | 0.344260  | -1.240588 | 2 | 2 | KIRP | 67 | 0.0 | NA  | NA |
| TCGA-DW-5561 | 8.183945  | 0.318113  | 0.733085  | 2 | 2 | KIRP | 14 | 0.0 | 55  | NA |
| TCGA-B9-A44B | 8.947601  | 0.300417  | -0.699466 | 2 | 2 | KIRP | 12 | 0.0 | 59  | 36 |
| TCGA-BQ-5893 | 4.755261  | 0.150430  | #NUM!     | 2 | 2 | KIRP | 8  | 1.0 | 68  | 11 |
| TCGA-HE-7130 | 4.595826  | 0.010923  | #NUM!     | 2 | 2 | KIRP | 58 | 0.0 | 72  | 47 |
| TCGA-IZ-8196 | 7.674636  | -0.145286 | #NUM!     | 2 | 2 | KIRP | 21 | 0.0 | 64  | 28 |
| TCGA-5P-A9KH | 7.044151  | -0.435575 | #NUM!     | 2 | 2 | KIRP | 67 | 0.0 | 33  | NA |
| TCGA-G7-A8LB | 7.231542  | -0.626380 | #NUM!     | 2 | 2 | KIRP | 18 | 0.0 | NA  | NA |
| TCGA-B9-A8YI | 7.770247  | -0.676921 | #NUM!     | 2 | 2 | KIRP | 12 | 0.0 | 64  | NA |

|              |          |           |         |   |   |      |    |     |      |      |
|--------------|----------|-----------|---------|---|---|------|----|-----|------|------|
| TCGA-HE-7129 | 6.297854 | -1.032979 | #NUM!   | 2 | 2 | KIRP | 82 | 0.0 | NA   | 12   |
| TCGA-2Z-A9J9 | 7.955779 | #NUM!     | #NUM!   | 2 | 2 | KIRP | 75 | 0.0 | NA   | NA   |
| TCGA-MH-A857 | 7.815924 | #NUM!     | #NUM!   | 2 | 2 | KIRP | 29 | 0.0 | NA   | NA   |
| TCGA-AL-A5DJ | 7.725514 | #NUM!     | #NUM!   | 2 | 2 | KIRP | 49 | 1.0 | 60   | 7    |
| TCGA-B9-4617 | 7.676332 | #NUM!     | #NUM!   | 2 | 2 | KIRP | 1  | 0.0 | 103  | 21   |
| TCGA-4A-A93X | 7.670730 | #NUM!     | #NUM!   | 2 | 2 | KIRP | 13 | 0.0 | NA   | NA   |
| TCGA-SX-A7SO | 7.644585 | #NUM!     | #NUM!   | 2 | 2 | KIRP | 41 | 0.0 | NA   | NA   |
| TCGA-B3-4104 | 6.266247 | #NUM!     | #NUM!   | 2 | 2 | KIRP | 34 | 0.0 | 37   | 35   |
| TCGA-AJ-A3QS | 9.6432   | 3.3762    | -0.3243 | 2 | 2 | UCEC | 17 | 0   | NA   | NA   |
| TCGA-DF-A2KZ | 8.1450   | 3.8596    | -0.3103 | 2 | 2 | UCEC | 27 | 0   | NA   | NA   |
| TCGA-AX-A3FZ | 7.7691   | 2.5758    | #NUM!   | 2 | 2 | UCEC | 0  | 0   | NA   | NA   |
| TCGA-AJ-A3BF | 7.7554   | 2.1738    | #NUM!   | 2 | 2 | UCEC | 18 | 0   | NA   | NA   |
| TCGA-AJ-A3NC | 7.7464   | 2.7229    | #NUM!   | 2 | 2 | UCEC | 37 | 0   | NA   | NA   |
| TCGA-BK-A6W4 | 7.6934   | 1.9707    | #NUM!   | 2 | 2 | UCEC | 10 | 0   | NA   | NA   |
| TCGA-B5-A3FC | 7.6868   | 1.5496    | #NUM!   | 2 | 2 | UCEC | 72 | 0   | NA   | NA   |
| TCGA-AX-A3FT | 7.6385   | 2.5941    | -1.1062 | 2 | 2 | UCEC | 0  | 0   | NA   | NA   |
| TCGA-AJ-A3BD | 7.5930   | 0.9206    | -0.6643 | 2 | 2 | UCEC | 34 | 0   | NA   | NA   |
| TCGA-AX-A3G1 | 7.5117   | 1.5683    | #NUM!   | 2 | 2 | UCEC | 21 | 1   | NA   | NA   |
| TCGA-FI-A3PX | 7.4863   | 2.4099    | #NUM!   | 2 | 2 | UCEC | 78 | 0   | NA   | NA   |
| TCGA-BK-A56F | 7.4818   | 2.8420    | -1.2454 | 2 | 2 | UCEC | 13 | 0   | NA   | NA   |
| TCGA-E6-A2P9 | 7.4816   | 2.2337    | -1.2257 | 2 | 2 | UCEC | 46 | 0   | NA   | NA   |
| TCGA-BK-A6W3 | 7.4192   | 1.7012    | -1.7583 | 2 | 2 | UCEC | 10 | 0   | NA   | NA   |
| TCGA-B5-A0JR | 7.4073   | 2.3870    | #NUM!   | 2 | 2 | UCEC | 57 | 0   | #N/A | #N/A |
| TCGA-EY-A210 | 7.4030   | 2.3852    | -1.1996 | 2 | 2 | UCEC | 13 | 0   | NA   | NA   |
| TCGA-EO-A3AS | 7.3966   | 1.2935    | #NUM!   | 2 | 2 | UCEC | 34 | 0   | NA   | NA   |
| TCGA-A5-AB3J | 7.3936   | 2.4356    | -1.2650 | 2 | 2 | UCEC | 17 | 0   | NA   | NA   |
| TCGA-AJ-A8CW | 7.3635   | 0.7232    | #NUM!   | 2 | 2 | UCEC | 0  | 0   | NA   | NA   |
| TCGA-AJ-A23N | 7.2966   | 2.7507    | #NUM!   | 2 | 2 | UCEC | 14 | 1   | NA   | NA   |
| TCGA-EY-A5W2 | 7.2816   | 1.7140    | #NUM!   | 2 | 2 | UCEC | 17 | 0   | NA   | NA   |
| TCGA-AJ-A3OL | 7.2732   | 0.9810    | #NUM!   | 2 | 2 | UCEC | 15 | 1   | NA   | NA   |
| TCGA-DF-A2KV | 7.2109   | 2.7902    | -0.7946 | 2 | 2 | UCEC | 89 | 0   | NA   | NA   |
| TCGA-B5-A3FH | 7.1981   | 0.2507    | #NUM!   | 2 | 2 | UCEC | 28 | 0   | NA   | NA   |
| TCGA-AJ-A8CT | 7.1521   | 2.3052    | #NUM!   | 2 | 2 | UCEC | 3  | 0   | NA   | NA   |
| TCGA-BG-A3EV | 7.1444   | -1.6790   | -1.6790 | 2 | 2 | UCEC | 11 | 0   | NA   | NA   |
| TCGA-AJ-A5DV | 7.1109   | 2.7604    | -1.1466 | 2 | 2 | UCEC | 22 | 0   | NA   | NA   |
| TCGA-5B-A90C | 7.0930   | -0.6604   | #NUM!   | 2 | 2 | UCEC | 39 | 0   | NA   | NA   |
| TCGA-EO-A3KX | 7.0658   | 1.9262    | -1.0737 | 2 | 2 | UCEC | 38 | 0   | NA   | NA   |
| TCGA-AX-A3FW | 7.0437   | 0.8220    | #NUM!   | 2 | 2 | UCEC | 1  | 0   | NA   | NA   |
| TCGA-B5-A3FB | 7.0318   | 0.1070    | #NUM!   | 2 | 2 | UCEC | 93 | 0   | NA   | NA   |
| TCGA-EY-A2OQ | 6.9998   | 0.8705    | -1.1294 | 2 | 2 | UCEC | 29 | 0   | NA   | NA   |
| TCGA-AX-A3GB | 6.9866   | 2.2931    | #NUM!   | 2 | 2 | UCEC | 14 | 0   | NA   | NA   |
| TCGA-EO-A3KV | 6.9744   | 1.4706    | #NUM!   | 2 | 2 | UCEC | 16 | 0   | NA   | NA   |
| TCGA-BG-A0Mk | 6.9492   | 0.4482    | #NUM!   | 2 | 2 | UCEC | 43 | 1   | NA   | NA   |
| TCGA-B5-A5OD | 6.9394   | 2.5609    | -1.3459 | 2 | 2 | UCEC | 34 | 0   | NA   | NA   |
| TCGA-AJ-A3EL | 6.9188   | 1.3802    | #NUM!   | 2 | 2 | UCEC | 22 | 0   | NA   | NA   |
| TCGA-AX-A3G7 | 6.8992   | #NUM!     | #NUM!   | 2 | 2 | UCEC | 0  | 0   | NA   | NA   |
| TCGA-PG-A914 | 6.8673   | 2.9325    | #NUM!   | 2 | 2 | UCEC | 23 | 0   | NA   | NA   |
| TCGA-KP-A3WC | 6.8463   | 0.8193    | #NUM!   | 2 | 2 | UCEC | 13 | 0   | NA   | NA   |
| TCGA-H5-A2HR | 6.8219   | 2.0145    | #NUM!   | 2 | 2 | UCEC | 2  | 0   | NA   | NA   |
| TCGA-A5-A3LP | 6.7723   | 1.6139    | #NUM!   | 2 | 2 | UCEC | 15 | 0   | NA   | NA   |
| TCGA-AJ-A3OJ | 6.7525   | #NUM!     | #NUM!   | 2 | 2 | UCEC | 15 | 0   | NA   | NA   |
| TCGA-QS-A744 | 6.7523   | 0.8779    | -1.7070 | 2 | 2 | UCEC | 15 | 0   | NA   | NA   |
| TCGA-AX-A3G6 | 6.7271   | -1.1184   | #NUM!   | 2 | 2 | UCEC | 0  | 0   | NA   | NA   |
| TCGA-QF-A5YT | 6.6970   | 1.2641    | -1.0580 | 2 | 2 | UCEC | 40 | 0   | NA   | NA   |

|              |        |         |         |   |   |       |     |     |      |      |
|--------------|--------|---------|---------|---|---|-------|-----|-----|------|------|
| TCGA-AJ-A3NH | 6.6751 | #NUM!   | #NUM!   | 2 | 2 | UCEC  | 10  | 1   | NA   | NA   |
| TCGA-AJ-A3EM | 6.6532 | -0.3912 | #NUM!   | 2 | 2 | UCEC  | 22  | 0   | NA   | NA   |
| TCGA-5S-A9Q8 | 6.5907 | 2.3683  | #NUM!   | 2 | 2 | UCEC  | 10  | 0   | NA   | NA   |
| TCGA-AJ-A3TW | 6.5830 | 1.9521  | #NUM!   | 2 | 2 | UCEC  | 17  | 0   | NA   | NA   |
| TCGA-AX-A3G8 | 6.4947 | 1.0029  | #NUM!   | 2 | 2 | UCEC  | 1   | 0   | NA   | NA   |
| TCGA-BG-A3PP | 6.4804 | -0.9119 | #NUM!   | 2 | 2 | UCEC  | 22  | 0   | NA   | NA   |
| TCGA-EY-A1GL | 6.4690 | 0.5621  | #NUM!   | 2 | 2 | UCEC  | 33  | 0   | NA   | NA   |
| TCGA-AJ-A3I9 | 6.4591 | 2.9931  | -1.3288 | 2 | 2 | UCEC  | 17  | 1   | NA   | NA   |
| TCGA-EY-A2OC | 6.4563 | 2.4948  | #NUM!   | 2 | 2 | UCEC  | 46  | 0   | NA   | NA   |
| TCGA-B5-A3F9 | 6.3750 | 2.3132  | -1.0087 | 2 | 2 | UCEC  | 137 | 0   | NA   | NA   |
| TCGA-AX-A3FV | 6.3651 | 2.4794  | #NUM!   | 2 | 2 | UCEC  | 0   | 0   | NA   | NA   |
| TCGA-DF-A2L0 | 6.3553 | 1.9630  | #NUM!   | 2 | 2 | UCEC  | 26  | 1   | NA   | NA   |
| TCGA-EO-A3AY | 6.2291 | 2.8952  | #NUM!   | 2 | 2 | UCEC  | 38  | 0   | NA   | NA   |
| TCGA-B5-A1MM | 6.2243 | -0.4552 | #NUM!   | 2 | 2 | UCEC  | 15  | 0   | NA   | NA   |
| TCGA-B5-A1MS | 6.1755 | 2.3889  | #NUM!   | 2 | 2 | UCEC  | 102 | 1   | NA   | NA   |
| TCGA-EO-A1Y7 | 6.1138 | -0.9523 | #NUM!   | 2 | 2 | UCEC  | 49  | 0   | NA   | NA   |
| TCGA-PG-A917 | 6.0822 | 0.1164  | #NUM!   | 2 | 2 | UCEC  | 7   | 0   | NA   | NA   |
| TCGA-DF-A2KR | 5.9803 | 1.3607  | #NUM!   | 2 | 2 | UCEC  | 72  | 0   | NA   | NA   |
| TCGA-AX-A3FX | 5.9040 | 2.2195  | -0.5879 | 2 | 2 | UCEC  | 44  | 1   | NA   | NA   |
| TCGA-EY-A1GC | 5.8524 | 1.4329  | #NUM!   | 2 | 2 | UCEC  | 19  | 0   | NA   | NA   |
| TCGA-EY-A1GX | 5.6888 | 3.1463  | #NUM!   | 2 | 2 | UCEC  | 37  | 1   | NA   | NA   |
| TCGA-A5-A2K5 | 5.0395 | 0.7417  | #NUM!   | 2 | 2 | UCEC  | 25  | 0   | NA   | NA   |
| TCGA-EY-A72D | 4.9950 | #NUM!   | #NUM!   | 2 | 2 | UCEC  | 6   | 0   | NA   | NA   |
| TCGA-CK-6746 | #####  | #####   | #NUM!   | 2 | 2 | Colon | 0   | 0.0 | NA   | NA   |
| TCGA-AZ-4614 | #####  | #####   | #####   | 2 | 2 | Colon | 6   | 1.0 | NA   | NA   |
| TCGA-AA-A000 | #####  | #####   | #####   | 2 | 2 | Colon | 27  | 0.0 | #N/A | #N/A |
| TCGA-AA-3941 | #####  | #####   | #####   | 2 | 2 | Colon | 24  | 0.0 | #N/A | #N/A |
| TCGA-AA-A004 | #####  | #####   | #####   | 2 | 2 | Colon | 14  | 0.0 | #N/A | #N/A |
| TCGA-DM-A28E | #####  | #####   | #####   | 2 | 2 | Colon | 120 | 0.0 | 9    | NA   |
| TCGA-CM-5862 | #####  | #####   | #####   | 2 | 2 | Colon | 5   | 1.0 | 34   | NA   |
| TCGA-CM-6172 | #####  | #####   | #####   | 2 | 2 | Colon | 11  | 0.0 | 31   | NA   |
| TCGA-AZ-4308 | #####  | #####   | #####   | 2 | 2 | Colon | 109 | 0.0 | #N/A | #N/A |
| TCGA-NH-A50V | #####  | #####   | #NUM!   | 2 | 2 | Colon | 19  | 0.0 | NA   | NA   |
| TCGA-5M-AAT6 | #####  | #####   | #NUM!   | 2 | 2 | Colon | 10  | 1.0 | NA   | NA   |
| TCGA-CM-5349 | #####  | #####   | #####   | 2 | 2 | Colon | 30  | 0.0 | 29   | NA   |
| TCGA-A6-2679 | #####  | #####   | #####   | 2 | 2 | Colon | 45  | 0.0 | #N/A | #N/A |
| TCGA-AA-A01T | #####  | #####   | #####   | 2 | 2 | Colon | 33  | 0.0 | #N/A | #N/A |
| TCGA-F4-6461 | #####  | #####   | #####   | 2 | 2 | Colon | 11  | 1.0 | 50   | NA   |
| TCGA-AZ-4315 | #####  | #####   | #####   | 2 | 2 | Colon | 58  | 0.0 | 2455 | NA   |
| TCGA-AA-3667 | #####  | #####   | #####   | 2 | 2 | Colon | 14  | 0.0 | #N/A | #N/A |
| TCGA-G4-6304 | #####  | #####   | #####   | 2 | 2 | Colon | 54  | 0.0 | 105  | NA   |
| TCGA-AD-A5EK | #####  | #####   | #####   | 2 | 2 | Colon | 16  | 0.0 | NA   | NA   |
| TCGA-DM-A1DE | #####  | #NUM!   | #NUM!   | 2 | 2 | Colon | 13  | 1.0 | 56   | NA   |
| TCGA-AA-A02K | #####  | #####   | #NUM!   | 2 | 2 | Colon | 14  | 1.0 | NA   | NA   |
| TCGA-G4-6307 | #####  | #####   | #####   | 2 | 2 | Colon | 55  | 0.0 | 23   | NA   |
| TCGA-A6-6142 | #####  | #####   | #NUM!   | 2 | 2 | Colon | 25  | 0.0 | 30   | NA   |
| TCGA-AA-3679 | #####  | #####   | #####   | 2 | 2 | Colon | 15  | 0.0 | #N/A | #N/A |
| TCGA-RU-A8FL | #####  | #NUM!   | #NUM!   | 2 | 2 | Colon | 39  | 0.0 | NA   | NA   |
| TCGA-DM-A282 | #####  | #####   | #####   | 2 | 2 | Colon | 139 | 0.0 | 26   | NA   |
| TCGA-AA-A00R | #####  | #####   | #####   | 2 | 2 | Colon | 1   | 0.0 | #N/A | #N/A |
| TCGA-AA-3548 | #####  | #####   | #####   | 2 | 2 | Colon | 34  | 0.0 | #N/A | #N/A |
| TCGA-G4-6323 | #####  | #####   | #NUM!   | 2 | 2 | Colon | 14  | 0.0 | 36   | NA   |
| TCGA-AA-3815 | #####  | #####   | #####   | 2 | 2 | Colon | 33  | 0.0 | #N/A | #N/A |
| TCGA-CM-6165 | #####  | #####   | #####   | 2 | 2 | Colon | 16  | 0.0 | 55   | NA   |

|              |       |       |       |   |   |       |     |     |      |      |
|--------------|-------|-------|-------|---|---|-------|-----|-----|------|------|
| TCGA-AA-A02R | ##### | ##### | ##### | 2 | 2 | Colon | 22  | 1.0 | #N/A | #N/A |
| TCGA-AA-A00A | ##### | ##### | ##### | 2 | 2 | Colon | 38  | 0.0 | #N/A | #N/A |
| TCGA-A6-2676 | ##### | ##### | ##### | 2 | 2 | Colon | 43  | 1.0 | #N/A | #N/A |
| TCGA-AA-A00Q | ##### | ##### | ##### | 2 | 2 | Colon | 42  | 0.0 | #N/A | #N/A |
| TCGA-CK-5916 | ##### | ##### | #NUM! | 2 | 2 | Colon | 21  | 1.0 | 604  | NA   |
| TCGA-AA-3495 | ##### | ##### | ##### | 2 | 2 | Colon | 37  | 0.0 | NA   | NA   |
| TCGA-AA-3502 | ##### | ##### | ##### | 2 | 2 | Colon | 35  | 0.0 | 61   | NA   |
| TCGA-AA-A01Q | ##### | ##### | ##### | 2 | 2 | Colon | 1   | 0.0 | #N/A | #N/A |
| TCGA-AA-3553 | ##### | ##### | ##### | 2 | 2 | Colon | 24  | 0.0 | #N/A | #N/A |
| TCGA-G4-6298 | ##### | ##### | #NUM! | 2 | 2 | Colon | 23  | 1.0 | 99   | NA   |
| TCGA-AA-3939 | ##### | ##### | ##### | 2 | 2 | Colon | 13  | 0.0 | #N/A | #N/A |
| TCGA-AY-A71X | ##### | ##### | ##### | 2 | 2 | Colon | 19  | 0.0 | NA   | NA   |
| TCGA-AZ-5407 | ##### | ##### | #NUM! | 2 | 2 | Colon | 88  | 0.0 | 101  | NA   |
| TCGA-DM-A1DA | ##### | ##### | #NUM! | 2 | 2 | Colon | 7   | 1.0 | 127  | NA   |
| TCGA-CA-5256 | ##### | ##### | ##### | 2 | 2 | Colon | 12  | 0.0 | NA   | NA   |
| TCGA-DM-A1HA | ##### | ##### | #NUM! | 2 | 2 | Colon | 131 | 0.0 | 73   | NA   |
| TCGA-AY-A54L | ##### | ##### | #NUM! | 2 | 2 | Colon | 17  | 0.0 | NA   | NA   |
| TCGA-AA-3842 | ##### | ##### | ##### | 2 | 2 | Colon | 37  | 0.0 | #N/A | #N/A |
| TCGA-AA-A01I | ##### | ##### | ##### | 2 | 2 | Colon | 31  | 0.0 | #N/A | #N/A |
| TCGA-A6-5656 | ##### | ##### | ##### | 2 | 2 | Colon | 33  | 0.0 | 37   | NA   |
| TCGA-CM-5868 | ##### | ##### | #NUM! | 2 | 2 | Colon | 17  | 0.0 | 54   | NA   |
| TCGA-DM-A28C | ##### | ##### | ##### | 2 | 2 | Colon | 61  | 1.0 | 38   | NA   |
| TCGA-CM-6169 | ##### | ##### | ##### | 2 | 2 | Colon | 13  | 0.0 | 50   | NA   |
| TCGA-F4-6854 | ##### | ##### | ##### | 2 | 2 | Colon | 1   | 0.0 | 58   | NA   |
| TCGA-AA-3496 | ##### | ##### | ##### | 2 | 2 | Colon | 1   | 0.0 | NA   | NA   |
| TCGA-AA-3831 | ##### | ##### | ##### | 2 | 2 | Colon | 18  | 0.0 | #N/A | #N/A |
| TCGA-AA-3982 | ##### | ##### | ##### | 2 | 2 | Colon | 27  | 0.0 | #N/A | #N/A |
| TCGA-AA-3980 | ##### | ##### | ##### | 2 | 2 | Colon | 27  | 0.0 | #N/A | #N/A |
| TCGA-CM-4750 | ##### | ##### | ##### | 2 | 2 | Colon | 8   | 0.0 | #N/A | #N/A |
| TCGA-AA-A00L | ##### | ##### | ##### | 2 | 2 | Colon | 38  | 0.0 | #N/A | #N/A |
| TCGA-CM-4743 | ##### | ##### | ##### | 2 | 2 | Colon | 23  | 0.0 | 412  | NA   |
| TCGA-AA-3970 | ##### | ##### | ##### | 2 | 2 | Colon | 36  | 0.0 | #N/A | #N/A |
| TCGA-A6-5657 | ##### | ##### | ##### | 2 | 2 | Colon | 32  | 0.0 | 29   | NA   |
| TCGA-AA-3858 | ##### | ##### | ##### | 2 | 2 | Colon | 31  | 0.0 | #N/A | #N/A |
| TCGA-AA-3526 | ##### | ##### | ##### | 2 | 2 | Colon | 19  | 0.0 | 45   | 2    |
| TCGA-AA-3529 | ##### | ##### | ##### | 2 | 2 | Colon | 0   | 1.0 | #N/A | #N/A |
| TCGA-CA-5254 | ##### | ##### | ##### | 2 | 2 | Colon | 13  | 0.0 | NA   | NA   |
| TCGA-D5-5540 | ##### | ##### | ##### | 2 | 2 | Colon | 56  | 0.0 | 48   | NA   |
| TCGA-AA-3955 | ##### | ##### | ##### | 2 | 2 | Colon | 21  | 0.0 | #N/A | #N/A |
| TCGA-G4-6314 | ##### | ##### | ##### | 2 | 2 | Colon | 36  | 0.0 | 60   | NA   |
| TCGA-AA-3673 | ##### | ##### | ##### | 2 | 2 | Colon | 50  | 0.0 | #N/A | #N/A |
| TCGA-G4-6303 | ##### | ##### | ##### | 2 | 2 | Colon | 66  | 1.0 | 31   | NA   |
| TCGA-AA-3534 | ##### | ##### | ##### | 2 | 2 | Colon | 29  | 0.0 | #N/A | #N/A |
| TCGA-AA-3713 | ##### | ##### | ##### | 2 | 2 | Colon | 19  | 0.0 | 574  | NA   |
| TCGA-AA-3510 | ##### | ##### | ##### | 2 | 2 | Colon | 64  | 0.0 | #N/A | #N/A |
| TCGA-SS-A7HC | ##### | ##### | ##### | 2 | 2 | Colon | 60  | 0.0 | NA   | NA   |
| TCGA-AA-3509 | ##### | ##### | ##### | 2 | 2 | Colon | 63  | 0.0 | NA   | NA   |
| TCGA-A6-5660 | ##### | ##### | ##### | 2 | 2 | Colon | 29  | 0.0 | 37   | NA   |
| TCGA-A6-A56B | ##### | ##### | ##### | 2 | 2 | Colon | 56  | 1.0 | NA   | NA   |
| TCGA-G4-6588 | ##### | ##### | ##### | 2 | 2 | Colon | 26  | 0.0 | 831  | NA   |
| TCGA-D5-6538 | ##### | ##### | ##### | 2 | 2 | Colon | 17  | 0.0 | 51   | NA   |
| TCGA-CM-4751 | ##### | ##### | ##### | 2 | 2 | Colon | 27  | 0.0 | NA   | NA   |
| TCGA-A6-6141 | ##### | ##### | ##### | 2 | 2 | Colon | 8   | 0.0 | 420  | NA   |
| TCGA-AA-3678 | ##### | ##### | ##### | 2 | 2 | Colon | 47  | 0.0 | #N/A | #N/A |

|              |            |           |            |   |   |       |       |     |      |      |
|--------------|------------|-----------|------------|---|---|-------|-------|-----|------|------|
| TCGA-AA-A010 | #####      | #####     | #####      | 2 | 2 | Colon | 35    | 0.0 | #N/A | #N/A |
| TCGA-G4-6321 | #####      | #####     | #####      | 2 | 2 | Colon | 22    | 0.0 | 82   | NA   |
| TCGA-A6-5665 | #####      | #####     | #####      | 2 | 2 | Colon | 22    | 0.0 | 791  | NA   |
| TCGA-AA-3531 | #####      | #####     | #####      | 2 | 2 | Colon | 34    | 0.0 | #N/A | #N/A |
| TCGA-D5-6532 | #####      | #####     | #####      | 2 | 2 | Colon | 18    | 0.0 | 39   | NA   |
| TCGA-A6-6140 | #####      | #####     | #####      | 2 | 2 | Colon | 24    | 0.0 | 143  | NA   |
| TCGA-AA-3532 | #####      | #####     | #####      | 2 | 2 | Colon | 29    | 0.0 | #N/A | #N/A |
| TCGA-AZ-4682 | #####      | #####     | #####      | 2 | 2 | Colon | 22    | 1.0 | 34   | NA   |
| TCGA-D5-6920 | #####      | #####     | #####      | 2 | 2 | Colon | 12    | 0.0 | 39   | NA   |
| TCGA-G4-6295 | #####      | #####     | #####      | 2 | 2 | Colon | 8     | 0.0 | 48   | NA   |
| TCGA-A6-5661 | #####      | #####     | #####      | 2 | 2 | Colon | 34    | 0.0 | 439  | NA   |
| TCGA-AA-3697 | #####      | #####     | #####      | 2 | 2 | Colon | 85    | 0.0 | 202  | NA   |
| TCGA-AA-A00K | #####      | #####     | #####      | 2 | 2 | Colon | 18    | 0.0 | #N/A | #N/A |
| TCGA-D5-6923 | #####      | #####     | #####      | 2 | 2 | Colon | 12    | 0.0 | NA   | NA   |
| TCGA-G4-6293 | #####      | #####     | #####      | 2 | 2 | Colon | 133   | 0.0 | 64   | NA   |
| TCGA-AA-3989 | #####      | #####     | #####      | 2 | 2 | Colon | 8     | 1.0 | #N/A | #N/A |
| TCGA-AA-3506 | #####      | #####     | #####      | 2 | 2 | Colon | 58    | 0.0 | NA   | NA   |
| TCGA-A6-2680 | #####      | #####     | #####      | 2 | 2 | Colon | 35    | 0.0 | #N/A | #N/A |
| TCGA-G4-6306 | #####      | #####     | #####      | 2 | 2 | Colon | 45    | 0.0 | 41   | NA   |
| TCGA-AM-5820 | #####      | #####     | #####      | 2 | 2 | Colon | 0     | 0.0 | 1949 | NA   |
| TCGA-AZ-4616 | #####      | #####     | #####      | 2 | 2 | Colon | 5     | 1.0 | 26   | NA   |
| TCGA-AA-A01K | #####      | #####     | #####      | 2 | 2 | Colon | 31    | 0.0 | #N/A | #N/A |
| TCGA-AA-3947 | #####      | #####     | #####      | 2 | 2 | Colon | 33    | 0.0 | #N/A | #N/A |
| TCGA-AA-A01R | #####      | #####     | #####      | 2 | 2 | Colon | 35    | 0.0 | #N/A | #N/A |
| TCGA-AA-3966 | #####      | #####     | #####      | 2 | 2 | Colon | 2     | 0.0 | #N/A | #N/A |
| TCGA-AA-3543 | #####      | #####     | #####      | 2 | 2 | Colon | 1     | 0.0 | #N/A | #N/A |
| TCGA-AA-A03F | #####      | #####     | #####      | 2 | 2 | Colon | 18    | 1.0 | #N/A | #N/A |
| TCGA-4T-AA8H | #####      | #####     | #####      | 2 | 2 | Colon | 13    | 0.0 | NA   | NA   |
| TCGA-D5-5539 | #####      | #####     | #####      | 2 | 2 | Colon | 20    | 0.0 | 45   | NA   |
| TCGA-AA-3821 | #####      | #####     | #####      | 2 | 2 | Colon | 1     | 0.0 | #N/A | #N/A |
| TCGA-A6-A566 | #####      | #####     | #####      | 2 | 2 | Colon | 25    | 1.0 | NA   | NA   |
| TCGA-CK-4951 | #####      | #####     | #####      | 2 | 2 | Colon | 70    | 1.0 | NA   | NA   |
| TCGA-QG-A5YV | #####      | #####     | #####      | 2 | 2 | Colon | 29    | 0.0 | NA   | NA   |
| TCGA-AA-3837 | #####      | #####     | #####      | 2 | 2 | Colon | 39    | 0.0 | #N/A | #N/A |
| TCGA-AA-3555 | #####      | #####     | #####      | 2 | 2 | Colon | 30    | 0.0 | #N/A | #N/A |
| TCGA-AA-3949 | #####      | #####     | #####      | 2 | 2 | Colon | 26    | 0.0 | #N/A | #N/A |
| TCGA-AA-A024 | #####      | #####     | #####      | 2 | 2 | Colon | 39    | 1.0 | #N/A | #N/A |
| TCGA-BA-A6DA | 4.87361636 | 0.1187584 | 1.7036766  | 4 | 2 | HNSC  | 11.53 | 0.0 | NA   | NA   |
| TCGA-CN-6988 | 6.71968726 | #NUM!     | -0.6553987 | 4 | 2 | HNSC  | 10.45 | 0.0 | 129  | 35   |
| TCGA-CN-5363 | 6.56702972 | #NUM!     | -0.0549917 | 4 | 2 | HNSC  | 8.31  | 1.0 | 152  | 30   |
| TCGA-T2-A6WZ | 5.77797722 | #NUM!     | 0.1632411  | 4 | 2 | HNSC  | 15.9  | 1.0 | NA   | NA   |
| TCGA-TN-A7HL | 6.71481424 | 0.0285692 | 0.0285692  | 4 | 2 | HNSC  | 20.34 | 0.0 | NA   | NA   |
| TCGA-UF-A7JS | 5.48681089 | #NUM!     | 0.5799525  | 4 | 2 | HNSC  | 22.34 | 1.0 | NA   | NA   |
| TCGA-BA-A6D8 | 6.19549918 | #NUM!     | 1.4540179  | 4 | 2 | HNSC  | 27.92 | 0.0 | NA   | NA   |
| TCGA-UF-A71E | 6.43205243 | #NUM!     | 0.841007   | 4 | 2 | HNSC  | 49.41 | 1.0 | NA   | NA   |
| TCGA-CV-7100 | 6.66753453 | -0.080698 | -0.0806981 | 4 | 2 | HNSC  | 9     | 1.0 | 17   | 1    |
| TCGA-CR-7394 | 6.9502666  | -0.633076 | -0.6330764 | 4 | 2 | HNSC  | 44.22 | 0.0 | 148  | 23   |
| TCGA-F7-A50I | 6.58687281 | -0.53199  | -0.5319902 | 4 | 2 | HNSC  | 3.02  | 0.0 | NA   | NA   |
| TCGA-CQ-A4CI | 6.87337398 | -0.224654 | 0.3603081  | 4 | 2 | HNSC  | 31.21 | 0.0 | NA   | NA   |
| TCGA-CV-5442 | 4.94982438 | 0.0672257 | -0.932912  | 4 | 2 | HNSC  | 76.45 | 0.0 | 233  | 27   |
| TCGA-CV-A6JE | 5.75563537 | -0.636661 | 0.9483018  | 4 | 2 | HNSC  | 35.32 | 0.0 | NA   | NA   |
| TCGA-CV-6940 | 6.51717331 | -0.257563 | 0.3273425  | 4 | 2 | HNSC  | 26.41 | 1.0 | 116  | 32   |
| TCGA-RY-A840 | 3.3249     | #NUM!     | -1.2602    | 4 | 2 | LGG   | 28.06 | 0   | NA   | NA   |
| TCGA-FG-A60K | 5.0821     | #NUM!     | 0.7602     | 4 | 2 | LGG   | 17.81 | 0   | 18   | 9    |

|              |        |         |         |   |   |     |       |   |    |    |
|--------------|--------|---------|---------|---|---|-----|-------|---|----|----|
| TCGA-E1-5318 | 5.2471 | #NUM!   | -0.4110 | 4 | 2 | LGG | 78.15 | 1 | 29 | NA |
| TCGA-FG-A4MX | 5.4976 | #NUM!   | 1.5907  | 4 | 2 | LGG | 18.69 | 0 | 19 | 6  |
| TCGA-HT-7855 | 6.2310 | #NUM!   | 0.5108  | 4 | 2 | LGG | 19.22 | 0 | 28 | NA |
| TCGA-DU-A5TV | 6.4229 | #NUM!   | 0.8230  | 4 | 2 | LGG | 24.97 | 0 | 31 | NA |
| TCGA-HW-8320 | 6.4724 | #NUM!   | -0.5148 | 4 | 2 | LGG | 39.98 | 0 | 19 | NA |
| TCGA-S9-A6U1 | 6.6554 | #NUM!   | -1.3270 | 4 | 2 | LGG | 25.79 | 0 | NA | NA |
| TCGA-HT-7684 | 7.1229 | #NUM!   | 2.5082  | 4 | 2 | LGG | 6.04  | 0 | 29 | 6  |
| TCGA-CS-5394 | 3.9404 | -1.5795 | -0.5797 | 4 | 2 | LGG | 0.26  | 0 | 19 | NA |
| TCGA-HT-A74L | 5.7915 | -1.5378 | 2.3689  | 4 | 2 | LGG | 11.04 | 0 | NA | NA |
| TCGA-DB-5280 | 5.3093 | -1.5109 | 0.0741  | 4 | 2 | LGG | 36.53 | 0 | 19 | 2  |
| TCGA-P5-A5EV | 6.4012 | -1.3126 | -0.3126 | 4 | 2 | LGG | 0.23  | 0 | 67 | 29 |
| TCGA-TQ-A7RU | 4.1127 | -1.2450 | 1.5625  | 4 | 2 | LGG | 33.90 | 0 | NA | NA |
| TCGA-DU-A6S7 | 6.3753 | -1.2321 | 1.0899  | 4 | 2 | LGG | 20.96 | 0 | NA | NA |
| TCGA-S9-A7QW | 6.1424 | -1.2122 | -1.2122 | 4 | 2 | LGG | 15.05 | 0 | NA | NA |
| TCGA-TQ-A7RK | 5.3643 | -1.1903 | 0.3946  | 4 | 2 | LGG | 44.05 | 0 | NA | NA |
| TCGA-QH-A870 | 6.6682 | -1.1828 | -1.1828 | 4 | 2 | LGG | 12.98 | 0 | NA | NA |
| TCGA-DB-A75M | 5.5599 | -1.1681 | -0.1680 | 4 | 2 | LGG | 17.87 | 0 | NA | NA |
| TCGA-HT-A619 | 4.1422 | -1.1434 | 0.4417  | 4 | 2 | LGG | 21.39 | 0 | 41 | 13 |
| TCGA-VM-A8CF | 6.1728 | -1.0847 | 0.9154  | 4 | 2 | LGG | 23.46 | 0 | NA | NA |
| TCGA-DB-A64S | 5.8086 | -1.0244 | -1.0244 | 4 | 2 | LGG | 27.43 | 0 | 11 | 3  |
| TCGA-FG-8185 | 4.2855 | -0.7343 | 0.5877  | 4 | 2 | LGG | 14.22 | 0 | 29 | 12 |
| TCGA-HT-7611 | 5.7765 | -0.6885 | 1.4814  | 4 | 2 | LGG | 57.56 | 0 | 25 | 5  |
| TCGA-HT-7873 | 7.0206 | -0.6124 | 0.9726  | 4 | 2 | LGG | 23.59 | 0 | 20 | 4  |
| TCGA-P5-A72Z | 6.7847 | -0.5385 | -0.5385 | 4 | 2 | LGG | 11.63 | 0 | NA | NA |
| TCGA-DU-5872 | 6.6322 | -0.5270 | -0.5270 | 4 | 2 | LGG | 17.48 | 0 | 21 | NA |
| TCGA-HT-7692 | 6.4695 | -0.3940 | 1.7760  | 4 | 2 | LGG | 2.96  | 0 | 16 | NA |
| TCGA-VW-A7QE | 2.8723 | -0.3756 | 3.7537  | 4 | 2 | LGG | 23.19 | 0 | NA | NA |
| TCGA-DU-6407 | 6.7753 | -0.3489 | -1.3489 | 4 | 2 | LGG | 94.45 | 1 | 17 | 10 |
| TCGA-DH-A7US | 5.5488 | -0.3092 | 0.6908  | 4 | 2 | LGG | 23.19 | 0 | NA | NA |
| TCGA-E1-A7Z4 | 7.0613 | -0.2558 | -1.2557 | 4 | 2 | LGG | ####  | 1 | NA | NA |
| TCGA-WY-A85E | 6.3829 | -0.2166 | 2.1053  | 4 | 2 | LGG | 45.76 | 0 | NA | NA |
| TCGA-HW-A5KL | 5.5749 | -0.0968 | -0.0968 | 4 | 2 | LGG | 28.84 | 0 | 16 | 9  |
| TCGA-S9-A6WN | 7.0404 | -0.0681 | 0.5168  | 4 | 2 | LGG | 26.45 | 0 | NA | NA |
| TCGA-S9-A7J0 | 4.7968 | -0.0611 | -0.0611 | 4 | 2 | LGG | 20.01 | 0 | NA | NA |
| TCGA-WY-A85D | 6.1787 | -0.0200 | 1.5649  | 4 | 2 | LGG | 37.68 | 0 | NA | NA |
| TCGA-CS-6186 | 6.6198 | -0.0135 | 2.6870  | 4 | 2 | LGG | 17.67 | 1 | 41 | 7  |
| TCGA-P5-A5F1 | 5.9538 | -0.0120 | -0.0120 | 4 | 2 | LGG | 5.88  | 0 | 15 | 6  |
| TCGA-DU-6399 | 6.1896 | 0.0063  | 0.0063  | 4 | 2 | LGG | 65.70 | 1 | 38 | 11 |
| TCGA-DU-6394 | 4.3656 | 0.0802  | -0.9198 | 4 | 2 | LGG | 22.40 | 1 | 27 | 11 |
| TCGA-TQ-A7RS | 4.6658 | 0.1847  | -0.4003 | 4 | 2 | LGG | -0.03 | 0 | NA | NA |
| TCGA-S9-A7J2 | 5.4280 | 0.1928  | -0.3921 | 4 | 2 | LGG | 2.04  | 0 | NA | NA |
| TCGA-P5-A735 | 6.7626 | 0.2004  | 0.7853  | 4 | 2 | LGG | 9.59  | 0 | NA | NA |
| TCGA-DU-5871 | 6.0035 | 0.2329  | -1.3522 | 4 | 2 | LGG | 18.92 | 0 | 22 | NA |
| TCGA-DU-7015 | 6.6896 | 0.2443  | -0.7558 | 4 | 2 | LGG | 90.70 | 0 | 26 | NA |
| TCGA-DU-A7TA | 5.7152 | 0.2558  | 3.6250  | 4 | 2 | LGG | 84.26 | 0 | NA | NA |
| TCGA-WY-A858 | 6.8530 | 0.2583  | -0.7418 | 4 | 2 | LGG | 43.92 | 0 | NA | NA |
| TCGA-WH-A86K | 6.1108 | 0.2653  | 0.8503  | 4 | 2 | LGG | 13.30 | 0 | NA | NA |
| TCGA-VV-A829 | 4.9355 | 0.2916  | -0.2934 | 4 | 2 | LGG | 37.02 | 0 | NA | NA |
| TCGA-TQ-A7RI | 6.3010 | 0.3238  | -1.2612 | 4 | 2 | LGG | 2.04  | 0 | NA | NA |
| TCGA-DH-A66B | 6.7110 | 0.3245  | 1.3245  | 4 | 2 | LGG | 42.02 | 0 | 34 | 9  |
| TCGA-S9-A6U5 | 5.2787 | 0.3400  | 1.3400  | 4 | 2 | LGG | 32.59 | 0 | NA | NA |
| TCGA-DU-A76C | 5.6749 | 0.4654  | 1.6878  | 4 | 2 | LGG | 17.15 | 0 | NA | NA |
| TCGA-TM-A84T | 5.7365 | 0.4759  | -0.1090 | 4 | 2 | LGG | 23.78 | 0 | NA | NA |
| TCGA-DH-A66F | 4.3470 | 0.5057  | -1.0792 | 4 | 2 | LGG | 17.18 | 0 | 15 | NA |



|              |         |          |          |   |   |      |       |   |      |      |
|--------------|---------|----------|----------|---|---|------|-------|---|------|------|
| TCGA-DH-5142 | 6.9777  | 0.5355   | -0.4645  | 4 | 2 | LGG  | 63.83 | 0 | 25   | 8    |
| TCGA-QH-A6CV | 6.8702  | 0.6017   | 1.0167   | 4 | 2 | LGG  | 13.60 | 0 | NA   | NA   |
| TCGA-DH-A7UV | 5.4411  | 0.6082   | 0.6082   | 4 | 2 | LGG  | 18.59 | 0 | NA   | NA   |
| TCGA-S9-A7J1 | 6.0315  | 0.6165   | 0.0315   | 4 | 2 | LGG  | 8.18  | 0 | NA   | NA   |
| TCGA-OR-A5JJ | 6.5432  | #NUM!    | 6.3750   | 4 | 2 | ACC  | 16.10 | 1 | 29   | NA   |
| TCGA-OR-A5K9 | 7.0284  | #NUM!    | 6.2410   | 4 | 2 | ACC  | 11.30 | 1 | 132  | NA   |
| TCGA-OR-A5K0 | 2.0801  | #NUM!    | 5.8874   | 4 | 2 | ACC  | 33.80 | 0 | 67   | NA   |
| TCGA-OR-A5JL | 6.3025  | #NUM!    | 4.7681   | 4 | 2 | ACC  | 67.54 | 0 | 19   | NA   |
| TCGA-OR-A5J5 | 6.4517  | #NUM!    | 4.4895   | 4 | 2 | ACC  | 11.99 | 1 | 387  | NA   |
| TCGA-P6-A5OF | 6.2891  | #NUM!    | 4.4529   | 4 | 2 | ACC  | 6.80  | 1 | 39   | NA   |
| TCGA-OR-A5LH | 7.0693  | #NUM!    | 4.1373   | 4 | 2 | ACC  | 78.35 | 1 | 32   | NA   |
| TCGA-OR-A5LC | 5.5900  | #NUM!    | 4.0252   | 4 | 2 | ACC  | 5.22  | 1 | 54   | NA   |
| TCGA-OR-A5JS | 6.1801  | #NUM!    | 3.9230   | 4 | 2 | ACC  | 12.58 | 0 | 51   | NA   |
| TCGA-OR-A5J9 | 6.2379  | #NUM!    | 3.0285   | 4 | 2 | ACC  | 44.42 | 0 | 44   | NA   |
| TCGA-OR-A5J3 | 4.7685  | #NUM!    | 2.8299   | 4 | 2 | ACC  | 68.69 | 0 | 31   | NA   |
| TCGA-OR-A5LK | 6.9707  | #NUM!    | 2.7612   | 4 | 2 | ACC  | 90.01 | 0 | 58   | NA   |
| TCGA-OR-A5LS | 6.7240  | #NUM!    | 2.4386   | 4 | 2 | ACC  | 36.01 | 0 | 49   | NA   |
| TCGA-OR-A5JP | 7.2517  | #NUM!    | 2.1348   | 4 | 2 | ACC  | 15.24 | 0 | 80   | NA   |
| TCGA-XV-AAZY | 7.13583 | 2.56596  | 1.15095  | 4 | 2 | SKCM | 13    | 0 | NA   | NA   |
| TCGA-D3-A2JD | 7.04765 | 2.56384  | -0.43616 | 4 | 2 | SKCM | 12    | 1 | 309  | NA   |
| TCGA-RP-A6K9 | 7.04964 | 2.54446  | -1.26292 | 4 | 2 | SKCM | ####  | 0 | NA   | NA   |
| TCGA-XV-A9VZ | 6.93289 | 2.40610  | 3.67911  | 4 | 2 | SKCM | 0     | 0 | NA   | NA   |
| TCGA-EE-A29G | 6.74207 | 2.39012  | 2.04219  | 4 | 2 | SKCM | 72    | 1 | 330  | 86   |
| TCGA-EB-A3XD | 6.73742 | 2.32193  | 3.56986  | 4 | 2 | SKCM | 38    | 0 | 334  | NA   |
| TCGA-EB-A5SF | 5.66373 | 2.27143  | -0.31348 | 4 | 2 | SKCM | 12    | 1 | 29   | NA   |
| TCGA-D3-A3C6 | 7.13711 | 2.22700  | -0.09496 | 4 | 2 | SKCM | 58    | 1 | 88   | NA   |
| TCGA-EB-A44N | 6.64133 | 2.22348  | 2.03083  | 4 | 2 | SKCM | 7     | 1 | 126  | NA   |
| TCGA-EE-A2GT | 6.61618 | 2.12869  | -1.04127 | 4 | 2 | SKCM | 45    | 0 | 284  | NA   |
| TCGA-D3-A3MF | 7.04180 | 2.05821  | -1.11185 | 4 | 2 | SKCM | 104   | 0 | 702  | 116  |
| TCGA-EB-A57M | 6.35312 | 2.01521  | 0.60017  | 4 | 2 | SKCM | 16    | 1 | 57   | NA   |
| TCGA-EB-A3Y7 | 6.16722 | 1.95222  | -0.85517 | 4 | 2 | SKCM | 11    | 1 | 882  | NA   |
| TCGA-WE-A8ZN | 7.08314 | 1.83520  | 1.83520  | 4 | 2 | SKCM | 59    | 0 | NA   | NA   |
| TCGA-BF-AAOU | 6.78962 | 1.69510  | 0.69510  | 4 | 2 | SKCM | 16    | 0 | NA   | NA   |
| TCGA-ER-A197 | 6.96205 | 1.64187  | -0.35808 | 4 | 2 | SKCM | 14    | 1 | 45   | NA   |
| TCGA-WE-A8K1 | 7.04064 | 1.57652  | -1.23074 | 4 | 2 | SKCM | 49    | 0 | NA   | NA   |
| TCGA-EB-A553 | 5.19367 | 1.56920  | -0.01581 | 4 | 2 | SKCM | 7     | 0 | 271  | NA   |
| TCGA-BF-AAP4 | 6.98340 | 1.51929  | 1.51929  | 4 | 2 | SKCM | 11    | 0 | NA   | NA   |
| TCGA-WE-A8ZC | 7.09838 | 1.50533  | -1.30187 | 4 | 2 | SKCM | 70    | 0 | NA   | NA   |
| TCGA-XV-AAZW | 6.95598 | 1.17460  | -0.14736 | 4 | 2 | SKCM | 13    | 1 | NA   | NA   |
| TCGA-BF-A5EQ | 6.26433 | 1.12862  | 0.39166  | 4 | 2 | SKCM | 11    | 0 | 499  | NA   |
| TCGA-D9-A3Z4 | 6.84525 | 0.94897  | -1.37295 | 4 | 2 | SKCM | 17    | 1 | 127  | NA   |
| TCGA-EB-A4OZ | 6.25223 | 0.81476  | 2.13668  | 4 | 2 | SKCM | 20    | 0 | 31   | NA   |
| TCGA-BF-A5ER | 5.44832 | 0.62387  | -0.96100 | 4 | 2 | SKCM | 11    | 0 | 159  | NA   |
| TCGA-BF-A3DL | 6.39482 | 0.55601  | -1.02885 | 4 | 2 | SKCM | 25    | 0 | 377  | 89   |
| TCGA-WE-A8ZY | 6.85192 | 0.51248  | -1.48762 | 4 | 2 | SKCM | 49    | 1 | NA   | NA   |
| TCGA-EE-A29H | 6.00005 | 0.42578  | -1.15907 | 4 | 2 | SKCM | 65    | 0 | 261  | NA   |
| TCGA-GN-A267 | 6.58638 | 0.31022  | -0.68966 | 4 | 2 | SKCM | 64    | 1 | 332  | NA   |
| TCGA-FS-A4F9 | 3.42579 | 0.20339  | -1.38157 | 4 | 2 | SKCM | 34    | 0 | 361  | NA   |
| TCGA-EB-A3HV | 6.75910 | 0.19547  | -1.38949 | 4 | 2 | SKCM | 1     | 0 | 59   | 10   |
| TCGA-EE-A20H | 6.31734 | 0.15795  | 4.20232  | 4 | 2 | SKCM | 168   | 1 | 485  | 53   |
| TCGA-GF-A769 | 7.07746 | 0.13553  | 1.35795  | 4 | 2 | SKCM | 35    | 1 | 128  | NA   |
| TCGA-GN-A4U4 | 6.09481 | 0.07984  | -1.50512 | 4 | 2 | SKCM | 39    | 0 | 553  | NA   |
| TCGA-ER-A196 | 7.12788 | 0.06226  | 0.06226  | 4 | 2 | SKCM | 59    | 0 | #N/A | #N/A |
| TCGA-BF-AAP1 | 7.14042 | -0.04216 | 0.37284  | 4 | 2 | SKCM | 13    | 0 | NA   | NA   |

|              |            |           |           |   |   |      |     |   |     |     |
|--------------|------------|-----------|-----------|---|---|------|-----|---|-----|-----|
| TCGA-FS-A1ZF | 7.09718    | -0.07263  | -0.07263  | 4 | 2 | SKCM | 15  | 1 | 162 | 29  |
| TCGA-EE-A2MT | 6.66234    | -0.28542  | -0.28542  | 4 | 2 | SKCM | 71  | 0 | 739 | NA  |
| TCGA-EE-A29Q | 6.91175    | -0.29779  | 1.60919   | 4 | 2 | SKCM | 67  | 1 | 231 | 37  |
| TCGA-BF-AAOX | 6.38397    | -0.87329  | -0.87329  | 4 | 2 | SKCM | 15  | 0 | NA  | NA  |
| TCGA-D3-A51T | 5.92152    | -0.99625  | -0.99625  | 4 | 2 | SKCM | 27  | 0 | 928 | NA  |
| TCGA-EB-A82C | 6.73295    | -1.17756  | -1.17756  | 4 | 2 | SKCM | 1   | 0 | NA  | NA  |
| TCGA-YD-A89C | 6.89201    | -1.20590  | -1.20590  | 4 | 2 | SKCM | 7   | 0 | NA  | NA  |
| TCGA-EB-A4IQ | 7.05358    | -1.25017  | -0.25017  | 4 | 2 | SKCM | 21  | 1 | 12  | NA  |
| TCGA-EB-A3Y6 | 6.13067    | -1.42314  | -1.42314  | 4 | 2 | SKCM | 4   | 0 | 484 | NA  |
| TCGA-XV-A9W2 | 5.47397    | #NUM!     | -0.84788  | 4 | 2 | SKCM | 14  | 0 | NA  | NA  |
| TCGA-WE-A8JZ | 6.64112    | #NUM!     | 0.33731   | 4 | 2 | SKCM | 24  | 0 | NA  | NA  |
| TCGA-EE-A29A | 6.69639    | #NUM!     | 0.35061   | 4 | 2 | SKCM | 63  | 1 | 205 | 20  |
| TCGA-FS-A1ZE | 6.72612    | #NUM!     | 0.42277   | 4 | 2 | SKCM | 46  | 1 | 121 | 22  |
| TCGA-DI-A1BU | 7.6971     | 0.5136    | -0.4864   | 4 | 2 | UCEC | 39  | 0 | NA  | NA  |
| TCGA-DF-A2KY | 7.6884     | 1.0627    | 2.2326    | 4 | 2 | UCEC | 11  | 0 | NA  | NA  |
| TCGA-AJ-A3NF | 7.6763     | 2.5431    | 0.4556    | 4 | 2 | UCEC | 21  | 0 | NA  | NA  |
| TCGA-AX-A3G4 | 7.6722     | #NUM!     | 1.6761    | 4 | 2 | UCEC | 0   | 0 | NA  | NA  |
| TCGA-AJ-A3OK | 7.5432     | 3.0737    | 1.6952    | 4 | 2 | UCEC | 16  | 0 | NA  | NA  |
| TCGA-AX-A3FS | 7.5183     | 1.0980    | 0.0980    | 4 | 2 | UCEC | 0   | 0 | NA  | NA  |
| TCGA-QS-A5YR | 7.2609     | #NUM!     | 1.0417    | 4 | 2 | UCEC | 24  | 0 | NA  | NA  |
| TCGA-AJ-A5DW | 7.1019     | 2.4368    | -0.2636   | 4 | 2 | UCEC | 13  | 0 | NA  | NA  |
| TCGA-EY-A547 | 7.0802     | 0.0634    | 1.6484    | 4 | 2 | UCEC | 18  | 0 | NA  | NA  |
| TCGA-D1-A3DA | 6.9653     | 2.2320    | 1.9100    | 4 | 2 | UCEC | 16  | 0 | NA  | NA  |
| TCGA-E6-A8L9 | 6.9522     | -1.0923   | -0.0922   | 4 | 2 | UCEC | 33  | 0 | NA  | NA  |
| TCGA-EY-A548 | 6.6481     | 0.3322    | -0.2527   | 4 | 2 | UCEC | 14  | 0 | NA  | NA  |
| TCGA-AJ-A3BK | 6.5215     | 2.2554    | 0.0854    | 4 | 2 | UCEC | 34  | 0 | NA  | NA  |
| TCGA-EO-A3L0 | 6.5211     | 1.6280    | -0.1794   | 4 | 2 | UCEC | 51  | 0 | NA  | NA  |
| TCGA-DF-A2KU | 6.4481     | 2.9700    | 0.1627    | 4 | 2 | UCEC | 101 | 0 | NA  | NA  |
| TCGA-A5-A7WK | 6.4303     | -1.6730   | 1.6489    | 4 | 2 | UCEC | 18  | 0 | NA  | NA  |
| TCGA-A5-A2K7 | 6.3924     | 2.3600    | -0.0994   | 4 | 2 | UCEC | 35  | 0 | NA  | NA  |
| TCGA-EO-A3B0 | 6.3367     | 1.8210    | 0.4060    | 4 | 2 | UCEC | 46  | 0 | NA  | NA  |
| TCGA-BS-A0V7 | 6.2947     | #NUM!     | 4.7097    | 4 | 2 | UCEC | 64  | 0 | 38  | 10  |
| TCGA-DI-A1C3 | 6.2158     | 3.1043    | 2.8819    | 4 | 2 | UCEC | 24  | 0 | NA  | NA  |
| TCGA-QS-A8F1 | 5.6973     | 1.6529    | 3.2379    | 4 | 2 | UCEC | 4   | 1 | NA  | NA  |
| TCGA-AX-A1C7 | 5.6389     | 1.1154    | -0.4695   | 4 | 2 | UCEC | 35  | 0 | 42  | 8   |
| TCGA-97-8547 | 9.03490821 | 3.8723767 | 9.0499894 | 4 | 2 | LUAD | 22  | 0 | NA  | NA  |
| TCGA-55-8614 | 7.79898496 | 3.8417065 | 3.5801744 | 4 | 2 | LUAD | 18  | 0 | NA  | NA  |
| TCGA-44-2655 | 8.04473879 | 3.6630223 | 3.5981591 | 4 | 2 | LUAD | 44  | 0 | 161 | 25  |
| TCGA-50-5072 | 8.95041251 | 3.5574995 | 4.3828602 | 4 | 2 | LUAD | 8   | 1 | 156 | NA  |
| TCGA-44-2665 | 8.44602694 | 3.391721  | 3.1672568 | 4 | 2 | LUAD | 43  | 0 | 38  | 26  |
| TCGA-55-8097 | 8.23359959 | 3.3568241 | 5.0362048 | 4 | 2 | LUAD | 16  | 0 | NA  | NA  |
| TCGA-05-4244 | 8.52387931 | 3.3404384 | 5.1209748 | 4 | 2 | LUAD | 0   | 0 | NA  | 37  |
| TCGA-55-7281 | 8.71912565 | 3.2942075 | 6.6368944 | 4 | 2 | LUAD | 29  | 0 | 409 | NA  |
| TCGA-44-7659 | 8.01619476 | 3.2855191 | 4.8537607 | 4 | 2 | LUAD | 23  | 0 | 130 | NA  |
| TCGA-50-5944 | 8.69454448 | 3.2176929 | 6.5379204 | 4 | 2 | LUAD | 57  | 0 | 59  | 13  |
| TCGA-49-4512 | 8.49115759 | 2.9051275 | 9.016961  | 4 | 2 | LUAD | 30  | 1 | 42  | 11  |
| TCGA-50-5932 | 8.77055194 | 2.8448155 | 4.2061454 | 4 | 2 | LUAD | 41  | 1 | 70  | 16  |
| TCGA-78-7167 | 8.17767766 | 2.5680516 | 4.7680927 | 4 | 2 | LUAD | 88  | 1 | 163 | NA  |
| TCGA-05-4427 | 8.46662178 | 2.5436542 | 4.7944086 | 4 | 2 | LUAD | 26  | 0 | NA  | 175 |
| TCGA-97-8179 | 7.65144368 | 1.6448669 | 4.9601989 | 4 | 2 | LUAD | 14  | 0 | NA  | NA  |
| TCGA-78-7158 | 8.72664062 | 3.9453886 | 6.6112414 | 4 | 2 | LUAD | 6   | 1 | 208 | NA  |
| TCGA-78-8655 | 8.8989983  | 3.9242196 | 6.2561028 | 4 | 2 | LUAD | 78  | 0 | NA  | NA  |
| TCGA-93-A4JO | 7.91611557 | 3.8975009 | 3.266902  | 4 | 2 | LUAD | 1   | 1 | NA  | NA  |
| TCGA-50-8460 | 8.6563191  | 3.7917078 | 6.6048804 | 4 | 2 | LUAD | 27  | 0 | NA  | NA  |

|              |            |           |           |   |   |      |       |     |      |      |
|--------------|------------|-----------|-----------|---|---|------|-------|-----|------|------|
| TCGA-97-A4M0 | 8.92853025 | 3.7773997 | 7.6805337 | 4 | 2 | LUAD | 21    | 0   | NA   | NA   |
| TCGA-J2-8192 | 8.4303033  | 3.7599835 | 5.0972016 | 4 | 2 | LUAD | 24    | 0   | NA   | NA   |
| TCGA-49-4510 | 7.52095727 | 3.6317818 | 3.7711672 | 4 | 2 | LUAD | 29    | 1   | 48   | 33   |
| TCGA-49-6743 | 8.89292614 | 3.6214611 | 3.9680778 | 4 | 2 | LUAD | 53    | 0   | NA   | 87   |
| TCGA-62-A46Y | 8.63746621 | 3.6109882 | 6.4398457 | 4 | 2 | LUAD | 14    | 1   | NA   | NA   |
| TCGA-67-6216 | 8.01215498 | 3.5993142 | 3.8605209 | 4 | 2 | LUAD | 5     | 0   | 46   | 12   |
| TCGA-64-1681 | 9.05741778 | 3.5833915 | 5.3486666 | 4 | 2 | LUAD | 38    | 1   | 79   | NA   |
| TCGA-73-4675 | 8.73818419 | 3.5144594 | 3.9156442 | 4 | 2 | LUAD | 30    | 1   | 62   | 19   |
| TCGA-67-6215 | 8.51047924 | 3.5125657 | 4.6016508 | 4 | 2 | LUAD | 6     | 0   | 113  | 30   |
| TCGA-55-8506 | 8.93313752 | 3.5088812 | 3.6594371 | 4 | 2 | LUAD | 0     | 0   | NA   | NA   |
| TCGA-78-7145 | 8.92305509 | 3.4463264 | 5.9929218 | 4 | 2 | LUAD | 27    | 1   | 165  | NA   |
| TCGA-67-3773 | 8.1012537  | 3.4301474 | 3.1744512 | 4 | 2 | LUAD | 14    | 0   | 92   | 25   |
| TCGA-05-4389 | 8.98353243 | 3.1953066 | 3.8638007 | 4 | 2 | LUAD | 45    | 0   | 220  | 52   |
| TCGA-MP-A4TH | 8.30168248 | 3.1505987 | 3.8313686 | 4 | 2 | LUAD | 24    | 0   | NA   | NA   |
| TCGA-55-A492 | 7.79787425 | 3.0288962 | 4.1223182 | 4 | 2 | LUAD | 20    | 0   | NA   | NA   |
| TCGA-86-8673 | 8.59163768 | 2.8865384 | 4.6109569 | 4 | 2 | LUAD | 28    | 0   | NA   | NA   |
| TCGA-05-4415 | 8.80224176 | 2.7288609 | 4.7809636 | 4 | 2 | LUAD | 3     | 1   | 172  | 27   |
| TCGA-55-8087 | 8.6154259  | 1.7949481 | 4.5718734 | 4 | 2 | LUAD | 15    | 0   | NA   | NA   |
| TCGA-95-8494 | 7.96466542 | 1.473205  | 5.9355465 | 4 | 2 | LUAD | 3     | 0   | NA   | NA   |
| TCGA-44-6776 | 8.14092586 | 0.8061756 | 3.8411056 | 4 | 2 | LUAD | 86    | 0   | 184  | 32   |
| TCGA-MP-A4TC | 8.38979333 | 3.9437891 | 4.7161289 | 4 | 2 | LUAD | 10    | 1   | NA   | NA   |
| TCGA-86-8076 | 8.64478783 | 3.7747554 | 3.3014838 | 4 | 2 | LUAD | 33    | 0   | NA   | NA   |
| TCGA-05-4405 | 8.7850187  | 3.5954535 | 3.8817547 | 4 | 2 | LUAD | 20    | 0   | 359  | 68   |
| TCGA-55-A57B | 8.7334243  | 3.576851  | 3.9343995 | 4 | 2 | LUAD | 18    | 0   | NA   | NA   |
| TCGA-91-8497 | 8.89186956 | 3.4973211 | 6.6162624 | 4 | 2 | LUAD | 14    | 1   | NA   | NA   |
| TCGA-35-5375 | 7.31595299 | 3.2223517 | 3.2218802 | 4 | 2 | LUAD | 9     | 0   | NA   | 75   |
| TCGA-78-7143 | 8.72208628 | 3.0684369 | 4.7909534 | 4 | 2 | LUAD | 163   | 1   | 40   | NA   |
| TCGA-55-6986 | 7.97865326 | 2.9112889 | 3.1686757 | 4 | 2 | LUAD | 107   | 0   | 22   | NA   |
| TCGA-75-6212 | 8.44164494 | 2.4013902 | 5.2737661 | 4 | 2 | LUAD | 50    | 1   | 25   | 4    |
| TCGA-55-7227 | 8.28264283 | 2.2041407 | 3.7785797 | 4 | 2 | LUAD | 31    | 1   | NA   | NA   |
| TCGA-JX-A3Q8 | #####      | #####     | #####     | 4 | 2 | CESC | 44.58 | 0.0 | 53   | 9    |
| TCGA-C5-A1MF | #####      | #####     | #####     | 4 | 2 | CESC | 53.12 | 0.0 | 67   | 25   |
| TCGA-C5-A7X8 | #####      | #####     | #####     | 4 | 2 | CESC | 2.73  | 0.0 | NA   | NA   |
| TCGA-EX-A1H6 | #####      | #NUM!     | #####     | 4 | 2 | CESC | 7.92  | 0.0 | 75   | 12   |
| TCGA-VS-A9UQ | #####      | #####     | #####     | 4 | 2 | CESC | 41.49 | 0.0 | NA   | NA   |
| TCGA-HM-A6WZ | #####      | #####     | #####     | 4 | 2 | CESC | 9.43  | 0.0 | 4    | 2    |
| TCGA-ZJ-AAXJ | #####      | #####     | #####     | 4 | 2 | CESC | 0.00  | 0.0 | NA   | NA   |
| TCGA-C5-A901 | #####      | #####     | #####     | 4 | 2 | CESC | 17.02 | 0.0 | NA   | NA   |
| TCGA-EA-A5ZD | #####      | #####     | #####     | 4 | 2 | CESC | 27.27 | 0.0 | #N/A | #N/A |
| TCGA-ZJ-AAXI | #####      | #####     | #####     | 4 | 2 | CESC | 0.00  | 0.0 | #N/A | #N/A |
| TCGA-ZJ-AAXF | #####      | #####     | #####     | 4 | 2 | CESC | 0.00  | 0.0 | NA   | NA   |
| TCGA-VS-A8EH | #####      | #NUM!     | #####     | 4 | 2 | CESC | 32.39 | 0.0 | NA   | NA   |
| TCGA-EX-A449 | #####      | #NUM!     | #####     | 4 | 2 | CESC | 14.68 | 0.0 | 26   | 4    |
| TCGA-C5-A8ZZ | #####      | #####     | #####     | 4 | 2 | CESC | 20.89 | 0.0 | NA   | NA   |
| TCGA-C5-A1M8 | #####      | #####     | #####     | 4 | 2 | CESC | 30.19 | 0.0 | 116  | 10   |
| TCGA-EA-A411 | #####      | #####     | #####     | 4 | 2 | CESC | 24.54 | 0.0 | 44   | 13   |
| TCGA-C5-A7X3 | #####      | #####     | #####     | 4 | 2 | CESC | 9.33  | 1.0 | 51   | 11   |
| TCGA-C5-A7CG | #####      | #####     | #####     | 4 | 2 | CESC | ####  | 0.0 | 48   | 11   |
| TCGA-DS-A0VL | #####      | #####     | #####     | 4 | 2 | CESC | 55.58 | 1.0 | 124  | 14   |
| TCGA-MA-AA43 | #####      | #####     | #####     | 4 | 2 | CESC | 11.37 | 0.0 | NA   | NA   |
| TCGA-ZJ-AAXD | #####      | #####     | #####     | 4 | 2 | CESC | 0.00  | 0.0 | NA   | NA   |
| TCGA-JX-A3Q0 | #####      | #####     | #####     | 4 | 2 | CESC | ####  | 0.0 | 609  | 170  |
| TCGA-JW-A5VL | #####      | #####     | #####     | 4 | 2 | CESC | 15.57 | 0.0 | 1824 | 386  |
| TCGA-IR-A3L7 | #####      | #####     | #####     | 4 | 2 | CESC | ####  | 0.0 | 31   | 8    |

|              |         |          |         |   |   |      |       |     |     |    |
|--------------|---------|----------|---------|---|---|------|-------|-----|-----|----|
| TCGA-12-5299 | 5.7405  | #NUM!    | 2.6816  | 4 | 2 | GBM  | 3     | 1.0 | 27  | 13 |
| TCGA-76-4932 | 6.9919  | #NUM!    | 2.1627  | 4 | 2 | GBM  | 48    | 1.0 | 40  | NA |
| TCGA-14-0790 | 5.8067  | #NUM!    | 1.0341  | 4 | 2 | GBM  | 14    | 1.0 | 45  | 13 |
| TCGA-BH-A1EV | 8.11686 | 3.20551  | 3.84077 | 4 | 2 | BRCA | 55.6  | 1   | 8   | 2  |
| TCGA-C8-A12Q | 8.28442 | 2.93952  | 2.58075 | 4 | 2 | BRCA | 12.6  | 1   | 77  | 16 |
| TCGA-B6-A0I1 | 7.83217 | 2.93429  | 2.94201 | 4 | 2 | BRCA | 77.6  | 1   | 38  | NA |
| TCGA-A2-A0SV | 8.58523 | 2.27400  | 2.70312 | 4 | 2 | BRCA | 27.1  | 1   | 25  | 7  |
| TCGA-BH-A1FG | 8.43738 | 2.11427  | 3.27460 | 4 | 2 | BRCA | 122.7 | 1   | 12  | 5  |
| TCGA-B6-A0RM | 7.53654 | 1.98058  | 3.15210 | 4 | 2 | BRCA | 78.0  | 1   | NA  | 3  |
| TCGA-GM-A2DA | 8.20440 | 1.45286  | 3.75175 | 4 | 2 | BRCA | 216.6 | 1   | 20  | NA |
| TCGA-BH-A8FY | 6.88314 | 0.64812  | 5.06806 | 4 | 2 | BRCA | 9.7   | 1   | NA  | NA |
| TCGA-B6-A0WW | 8.19174 | -2.99735 | 2.94971 | 4 | 2 | BRCA | 18.3  | 1   | 27  | 2  |
| TCGA-BH-A18N | 7.82694 | #NUM!    | 4.18899 | 4 | 2 | BRCA | 37.7  | 1   | 27  | 6  |
| TCGA-B6-A0IB | 6.02417 | #NUM!    | 4.41987 | 4 | 2 | BRCA | 129.5 | 1   | 50  | 10 |
| TCGA-S3-A6ZH | 7.86988 | 3.32672  | 2.67597 | 4 | 2 | BRCA | 21.1  | 0   | NA  | NA |
| TCGA-A2-A1FZ | 8.59675 | 3.29380  | 3.44012 | 4 | 2 | BRCA | 22.4  | 0   | 25  | 6  |
| TCGA-EW-A2FS | 7.88324 | 3.28235  | 4.30195 | 4 | 2 | BRCA | 52.7  | 0   | 20  | NA |
| TCGA-GM-A3NW | 7.50625 | 3.28041  | 5.17160 | 4 | 2 | BRCA | 110.4 | 0   | 63  | NA |
| TCGA-D8-A1X8 | 8.41778 | 3.27335  | 3.14168 | 4 | 2 | BRCA | 25.7  | 0   | 19  | 6  |
| TCGA-EW-A1OY | 8.14970 | 3.26870  | 2.77429 | 4 | 2 | BRCA | 29.8  | 0   | 50  | 12 |
| TCGA-OL-A66L | 8.23310 | 3.24491  | 5.97288 | 4 | 2 | BRCA | 42.7  | 0   | NA  | NA |
| TCGA-PL-A8LX | 8.05273 | 3.20576  | 2.71321 | 4 | 2 | BRCA | 0.2   | 0   | NA  | NA |
| TCGA-B6-A0RU | 7.97481 | 3.16739  | 2.58245 | 4 | 2 | BRCA | 282.7 | 0   | 36  | 12 |
| TCGA-AC-A3TM | 8.21903 | 3.16274  | 4.90263 | 4 | 2 | BRCA | 25.0  | 0   | 48  | NA |
| TCGA-A8-A07Z | 7.99091 | 3.15057  | 5.85400 | 4 | 2 | BRCA | 45.0  | 0   | 19  | 2  |
| TCGA-A7-A0CJ | 7.56280 | 3.14890  | 3.59991 | 4 | 2 | BRCA | 30.6  | 0   | 38  | 8  |
| TCGA-C8-A133 | 8.05383 | 3.12466  | 4.94222 | 4 | 2 | BRCA | 0.0   | 0   | 19  | 8  |
| TCGA-A1-A0SF | 8.36690 | 3.08394  | 3.98497 | 4 | 2 | BRCA | 48.1  | 0   | 32  | 7  |
| TCGA-B6-A40C | 8.34032 | 3.05745  | 2.65021 | 4 | 2 | BRCA | 71.1  | 0   | 29  | NA |
| TCGA-JL-A3YX | 8.44923 | 3.01793  | 3.41069 | 4 | 2 | BRCA | 11.6  | 0   | 28  | NA |
| TCGA-A2-A0CP | 8.63278 | 3.00408  | 3.44479 | 4 | 2 | BRCA | 92.4  | 0   | 73  | 6  |
| TCGA-GM-A5PV | 8.19173 | 2.94302  | 2.93810 | 4 | 2 | BRCA | 13.5  | 0   | 17  | NA |
| TCGA-EW-A2FW | 7.52584 | 2.92786  | 5.23719 | 4 | 2 | BRCA | 22.1  | 0   | 18  | NA |
| TCGA-EW-A424 | 7.73510 | 2.91061  | 5.60506 | 4 | 2 | BRCA | 23.5  | 0   | NA  | NA |
| TCGA-OL-A6VR | 7.58629 | 2.89606  | 4.87952 | 4 | 2 | BRCA | 40.1  | 0   | NA  | NA |
| TCGA-D8-A27R | 8.18731 | 2.87738  | 2.89092 | 4 | 2 | BRCA | 10.1  | 0   | 20  | 4  |
| TCGA-OK-A5Q2 | 8.11046 | 2.86759  | 3.33383 | 4 | 2 | BRCA | 2.1   | 0   | 22  | NA |
| TCGA-BH-AB28 | 7.98688 | 2.84732  | 2.84595 | 4 | 2 | BRCA | 9.4   | 0   | NA  | NA |
| TCGA-BH-A0DT | 8.31391 | 2.80372  | 4.24460 | 4 | 2 | BRCA | 78.9  | 0   | 11  | 3  |
| TCGA-GM-A5PX | 8.42944 | 2.77617  | 3.87802 | 4 | 2 | BRCA | 18.1  | 0   | 21  | NA |
| TCGA-S3-AA11 | 8.54491 | 2.77581  | 5.41683 | 4 | 2 | BRCA | 13.8  | 0   | NA  | NA |
| TCGA-A2-A3KD | 8.38557 | 2.75076  | 3.57339 | 4 | 2 | BRCA | 39.6  | 0   | 6   | NA |
| TCGA-E2-A14W | 8.51078 | 2.74893  | 3.20865 | 4 | 2 | BRCA | 32.0  | 0   | 67  | 13 |
| TCGA-AN-A0XL | 8.20723 | 2.71159  | 3.07871 | 4 | 2 | BRCA | 5.4   | 0   | 21  | 9  |
| TCGA-AR-A24Z | 8.54111 | 2.70769  | 3.88490 | 4 | 2 | BRCA | 98.6  | 0   | 32  | 10 |
| TCGA-BH-A18F | 8.06772 | 2.69748  | 3.10663 | 4 | 2 | BRCA | 32.9  | 0   | 39  | 9  |
| TCGA-E9-A295 | 7.72393 | 2.69681  | 4.91681 | 4 | 2 | BRCA | 12.3  | 0   | 58  | 9  |
| TCGA-BH-A42V | 8.31694 | 2.66432  | 5.21452 | 4 | 2 | BRCA | 20.9  | 0   | 30  | NA |
| TCGA-AO-A0JB | 7.46905 | 2.65905  | 2.58091 | 4 | 2 | BRCA | 50.7  | 0   | 73  | 11 |
| TCGA-C8-A12X | 8.62326 | 2.63706  | 3.28687 | 4 | 2 | BRCA | 12.6  | 0   | 32  | 7  |
| TCGA-D8-A140 | 8.65275 | 2.63252  | 4.43530 | 4 | 2 | BRCA | 13.2  | 0   | 67  | 17 |
| TCGA-AC-A8OF | 8.48198 | 2.58363  | 3.98404 | 4 | 2 | BRCA | 1.3   | 0   | NA  | NA |
| TCGA-AC-A5EH | 8.40408 | 2.57372  | 2.56546 | 4 | 2 | BRCA | 16.8  | 0   | 108 | NA |
| TCGA-AO-A12E | 8.23671 | 2.54569  | 4.10489 | 4 | 2 | BRCA | 70.4  | 0   | 370 | NA |

|              |         |         |         |   |   |      |       |   |      |      |
|--------------|---------|---------|---------|---|---|------|-------|---|------|------|
| TCGA-BH-A0DD | 7.70662 | 2.53435 | 2.53586 | 4 | 2 | BRCA | 81.7  | 0 | 13   | 12   |
| TCGA-AR-A1AU | 8.19857 | 2.50353 | 2.92255 | 4 | 2 | BRCA | 94.2  | 0 | 14   | 3    |
| TCGA-BH-A0B4 | 8.23348 | 2.45055 | 3.37141 | 4 | 2 | BRCA | 39.1  | 0 | 56   | 19   |
| TCGA-E2-A1L6 | 7.93303 | 2.40429 | 2.78396 | 4 | 2 | BRCA | 54.1  | 0 | 15   | 5    |
| TCGA-LD-A7W6 | 7.72028 | 2.36333 | 3.11356 | 4 | 2 | BRCA | 13.3  | 0 | NA   | NA   |
| TCGA-AC-A4ZE | 6.67220 | 2.35086 | 4.48969 | 4 | 2 | BRCA | 29.2  | 0 | NA   | NA   |
| TCGA-A8-A09V | 7.47050 | 2.33759 | 2.52825 | 4 | 2 | BRCA | 15.0  | 0 | 21   | 2    |
| TCGA-AC-A3TN | 7.36804 | 2.33303 | 4.76472 | 4 | 2 | BRCA | 15.0  | 0 | 95   | NA   |
| TCGA-AR-A2LO | 8.65082 | 2.29451 | 3.72545 | 4 | 2 | BRCA | 39.4  | 0 | 11   | NA   |
| TCGA-A8-A06Y | 8.35794 | 2.28880 | 5.33692 | 4 | 2 | BRCA | 26.0  | 0 | 25   | 8    |
| TCGA-EW-A1IX | 8.50987 | 2.25017 | 2.73928 | 4 | 2 | BRCA | 39.7  | 0 | 18   | 1    |
| TCGA-A2-A0YC | 7.53110 | 2.22653 | 4.85012 | 4 | 2 | BRCA | 32.5  | 0 | 16   | 2    |
| TCGA-V7-A7HQ | 7.39626 | 2.22032 | 3.73464 | 4 | 2 | BRCA | 66.8  | 0 | NA   | NA   |
| TCGA-B6-A0I5 | 7.63136 | 2.16172 | 2.85613 | 4 | 2 | BRCA | 281.1 | 0 | 19   | 3    |
| TCGA-A2-A1G4 | 7.28235 | 2.13502 | 4.05099 | 4 | 2 | BRCA | 19.6  | 0 | 26   | 5    |
| TCGA-AR-A5QM | 8.53692 | 2.11876 | 4.62763 | 4 | 2 | BRCA | 73.3  | 0 | 25   | NA   |
| TCGA-BH-A0HK | 7.83373 | 2.08246 | 3.04000 | 4 | 2 | BRCA | 5.8   | 0 | 153  | 10   |
| TCGA-A1-A0SJ | 8.13263 | 2.04856 | 2.85261 | 4 | 2 | BRCA | 13.7  | 0 | 27   | 7    |
| TCGA-OL-A66O | 7.69995 | 2.01447 | 2.59860 | 4 | 2 | BRCA | 17.4  | 0 | NA   | NA   |
| TCGA-E2-A2P6 | 7.56965 | 1.98746 | 4.02118 | 4 | 2 | BRCA | 34.5  | 0 | 100  | NA   |
| TCGA-AC-A3QF | 8.62328 | 1.94698 | 3.65275 | 4 | 2 | BRCA | 22.2  | 0 | 26   | NA   |
| TCGA-AN-A0XP | 7.75573 | 1.94435 | 2.75542 | 4 | 2 | BRCA | 0.3   | 0 | 19   | 8    |
| TCGA-LQ-A4E4 | 7.75577 | 1.92597 | 2.89759 | 4 | 2 | BRCA | 27.9  | 0 | 62   | NA   |
| TCGA-D8-A1XB | 8.53993 | 1.85327 | 3.40957 | 4 | 2 | BRCA | 18.1  | 0 | 23   | 5    |
| TCGA-E2-A15S | 7.45383 | 1.82926 | 2.53425 | 4 | 2 | BRCA | 14.1  | 0 | 34   | 8    |
| TCGA-D8-A1XY | 8.46640 | 1.80386 | 2.81831 | 4 | 2 | BRCA | 16.5  | 0 | 31   | 4    |
| TCGA-E2-A572 | 6.72611 | 1.75974 | 3.25175 | 4 | 2 | BRCA | 39.7  | 0 | NA   | NA   |
| TCGA-GM-A2DC | 7.63696 | 1.66422 | 3.88690 | 4 | 2 | BRCA | 83.3  | 0 | 15   | NA   |
| TCGA-A8-A083 | 6.99734 | 1.61787 | 4.36590 | 4 | 2 | BRCA | 0.0   | 0 | 28   | 7    |
| TCGA-AO-A126 | 8.02996 | 1.58723 | 3.70243 | 4 | 2 | BRCA | 108.6 | 0 | 15   | NA   |
| TCGA-A8-A0A9 | 7.93807 | 1.58653 | 3.53663 | 4 | 2 | BRCA | 27.0  | 0 | 42   | 10   |
| TCGA-E9-A1R0 | 7.78871 | 1.57900 | 3.71262 | 4 | 2 | BRCA | 28.2  | 0 | 19   | 6    |
| TCGA-A2-A04N | 8.22524 | 1.53905 | 2.54269 | 4 | 2 | BRCA | 143.0 | 0 | 33   | 6    |
| TCGA-AO-A125 | 6.21144 | 1.48310 | 4.66814 | 4 | 2 | BRCA | 113.5 | 0 | 32   | NA   |
| TCGA-E9-A1NI | 8.52412 | 1.48163 | 4.10502 | 4 | 2 | BRCA | 9.9   | 0 | 128  | 8    |
| TCGA-A8-A09M | 8.24401 | 1.47884 | 4.49422 | 4 | 2 | BRCA | 33.0  | 0 | 70   | 19   |
| TCGA-AC-A3YJ | 7.86252 | 1.47402 | 3.00206 | 4 | 2 | BRCA | 24.8  | 0 | 23   | NA   |
| TCGA-AO-A12B | 7.58366 | 1.46734 | 6.98551 | 4 | 2 | BRCA | 98.2  | 0 | 14   | 3    |
| TCGA-E2-A1BD | 7.30939 | 1.39891 | 5.39268 | 4 | 2 | BRCA | 37.2  | 0 | 24   | 2    |
| TCGA-A8-A09B | 7.76060 | 1.35690 | 5.12998 | 4 | 2 | BRCA | 12.0  | 0 | 30   | 5    |
| TCGA-D8-A1X5 | 8.52956 | 1.34185 | 3.74915 | 4 | 2 | BRCA | 18.6  | 0 | 34   | 5    |
| TCGA-EW-A6SC | 8.47073 | 1.16011 | 3.30718 | 4 | 2 | BRCA | 31.3  | 0 | NA   | NA   |
| TCGA-E2-A9RU | 8.48452 | 1.14669 | 2.56160 | 4 | 2 | BRCA | 17.7  | 0 | NA   | NA   |
| TCGA-C8-A1HG | 7.64231 | 1.11672 | 3.48216 | 4 | 2 | BRCA | 11.3  | 0 | 28   | 9    |
| TCGA-C8-A1HN | 8.63689 | 1.11229 | 3.49493 | 4 | 2 | BRCA | 12.9  | 0 | 36   | 10   |
| TCGA-E9-A54Y | 5.39763 | 1.04690 | 7.43288 | 4 | 2 | BRCA | 23.8  | 0 | #N/A | #N/A |
| TCGA-A7-A56D | 8.66105 | 0.95378 | 4.43223 | 4 | 2 | BRCA | 14.7  | 0 | 182  | NA   |
| TCGA-A8-A093 | 7.34829 | 0.87130 | 4.59555 | 4 | 2 | BRCA | 17.9  | 0 | 80   | 24   |
| TCGA-LL-A6FR | 8.34349 | 0.86330 | 5.28866 | 4 | 2 | BRCA | 16.1  | 0 | NA   | NA   |
| TCGA-E2-A105 | 6.85590 | 0.68088 | 5.33010 | 4 | 2 | BRCA | 43.0  | 0 | 50   | NA   |
| TCGA-C8-A8HQ | 8.22712 | 0.67632 | 3.04704 | 4 | 2 | BRCA | 12.5  | 0 | NA   | NA   |
| TCGA-LL-A50Y | 6.90479 | 0.63258 | 3.49636 | 4 | 2 | BRCA | 25.0  | 0 | 26   | NA   |
| TCGA-A2-A04U | 7.66545 | 0.62531 | 3.30220 | 4 | 2 | BRCA | 87.2  | 0 | 47   | 9    |
| TCGA-A2-A4RW | 8.20708 | 0.61057 | 5.53742 | 4 | 2 | BRCA | 7.3   | 0 | 89   | NA   |

|              |            |           |           |   |   |      |       |   |     |    |
|--------------|------------|-----------|-----------|---|---|------|-------|---|-----|----|
| TCGA-A7-A4SB | 7.16875    | 0.59690   | 3.06222   | 4 | 2 | BRCA | 13.7  | 0 | 32  | NA |
| TCGA-A8-A06Z | 6.71886    | 0.52966   | 2.76866   | 4 | 2 | BRCA | 1.0   | 0 | 46  | 16 |
| TCGA-D8-A1XU | 8.37242    | 0.47088   | 3.01385   | 4 | 2 | BRCA | 13.0  | 0 | 16  | 5  |
| TCGA-C8-A3M8 | 8.01689    | 0.45759   | 2.86271   | 4 | 2 | BRCA | 12.9  | 0 | 40  | NA |
| TCGA-C8-A26V | 8.21004    | 0.29553   | 2.86816   | 4 | 2 | BRCA | 20.2  | 0 | 56  | 14 |
| TCGA-D8-A1JI | 6.53840    | 0.27303   | 4.29183   | 4 | 2 | BRCA | 19.0  | 0 | 26  | 9  |
| TCGA-E2-A15G | 7.38469    | 0.13841   | 2.69450   | 4 | 2 | BRCA | 18.2  | 0 | 39  | 11 |
| TCGA-E9-A1R7 | 7.21653    | 0.12450   | 2.90475   | 4 | 2 | BRCA | 48.2  | 0 | 40  | 11 |
| TCGA-E9-A3Q9 | 7.96215    | 0.00277   | 3.00214   | 4 | 2 | BRCA | 32.9  | 0 | 34  | NA |
| TCGA-AN-A03Y | 7.81058    | -0.01237  | 2.79771   | 4 | 2 | BRCA | 0.3   | 0 | 22  | 6  |
| TCGA-AC-A23E | 8.40915    | -0.23045  | 4.00102   | 4 | 2 | BRCA | 22.9  | 0 | 14  | 1  |
| TCGA-E2-A155 | 7.92454    | -0.28282  | 2.78403   | 4 | 2 | BRCA | 21.0  | 0 | 39  | 6  |
| TCGA-BH-A0H0 | 7.49648    | -0.45678  | 2.65401   | 4 | 2 | BRCA | 15.1  | 0 | 14  | 1  |
| TCGA-D8-A27V | 8.13806    | -1.05565  | 3.16360   | 4 | 2 | BRCA | 12.5  | 0 | 164 | NA |
| TCGA-B6-A2IU | 6.78167    | -2.26181  | 2.55414   | 4 | 2 | BRCA | 170.0 | 0 | 34  | NA |
| TCGA-S3-AA12 | 6.13191    | -3.24674  | 3.52757   | 4 | 2 | BRCA | 18.9  | 0 | NA  | NA |
| TCGA-EW-A1P3 | 7.75302    | -3.96533  | 2.67811   | 4 | 2 | BRCA | 52.9  | 0 | 12  | 2  |
| TCGA-A7-A13F | 7.91375    | -4.51589  | 2.57460   | 4 | 2 | BRCA | 25.1  | 0 | 59  | 6  |
| TCGA-E2-A576 | 7.28914    | -4.61140  | 3.92412   | 4 | 2 | BRCA | 34.3  | 0 | NA  | NA |
| TCGA-E9-A1R6 | 7.99468    | -6.85642  | 3.75080   | 4 | 2 | BRCA | 11.1  | 0 | 20  | 5  |
| TCGA-A8-A085 | 7.74543    | #NUM!     | 4.45421   | 4 | 2 | BRCA | 36.9  | 0 | 54  | 21 |
| TCGA-C8-A12N | 8.54136    | #NUM!     | 5.94557   | 4 | 2 | BRCA | 11.8  | 0 | 16  | 4  |
| TCGA-L5-A8NR | 11.3448482 | 2.2178818 | 0.8869073 | 4 | 2 | ESCA | 8.71  | 0 | 179 | NA |
| TCGA-L5-A8NE | 11.1874504 | 1.8435942 | 0.8327586 | 4 | 2 | ESCA | 55.5  | 0 | 221 | NA |
| TCGA-L5-A88Z | 8.41941592 | 3.3580698 | 2.0375213 | 4 | 2 | ESCA | 7.39  | 0 | 66  | NA |
| TCGA-IC-A6RF | 9.92419816 | 2.9119548 | 1.4914914 | 4 | 2 | ESCA | 15.7  | 0 | 177 | NA |
| TCGA-L5-A88V | 11.2126756 | 1.163071  | 1.1608669 | 4 | 2 | ESCA | 2.6   | 0 | 152 | NA |
| TCGA-L5-A8NW | 11.1562411 | 3.464505  | 2.7645259 | 4 | 2 | ESCA | 46.1  | 1 | 142 | NA |
| TCGA-L5-A891 | 11.3695094 | 3.4319096 | 1.2913654 | 4 | 2 | ESCA | 3.75  | 0 | 152 | NA |
| TCGA-LN-A4A4 | 8.61597131 | 0.8339888 | 1.8490821 | 4 | 2 | ESCA | 12.6  | 0 | 86  | NA |
| TCGA-V5-AASV | 10.3820078 | -0.012042 | 0.9894204 | 4 | 2 | ESCA | 15.3  | 0 | 126 | NA |
| TCGA-LN-A8I1 | 7.29156718 | 0.2737359 | 1.2417852 | 4 | 2 | ESCA | 13.2  | 0 | 99  | NA |
| TCGA-LN-A9FQ | 8.72297835 | 0.8170722 | 0.8188263 | 4 | 2 | ESCA | 12.8  | 0 | 86  | NA |
| TCGA-LN-A4A1 | 8.72257012 | 1.731886  | 3.4524469 | 4 | 2 | ESCA | 12.6  | 0 | 112 | NA |
| TCGA-VR-A8EP | 9.34138249 | 2.9772536 | 1.3784842 | 4 | 2 | ESCA | 27.1  | 0 | 101 | NA |
| TCGA-VR-A8EO | 9.42175024 | 2.7285336 | 0.912438  | 4 | 2 | ESCA | 25.8  | 0 | 50  | NA |
| TCGA-LN-A4MC | 8.53090176 | #NUM!     | 2.473275  | 4 | 2 | ESCA | 12.3  | 0 | 77  | NA |
| TCGA-R6-A6KZ | 10.6494952 | 3.166493  | 2.8817401 | 4 | 2 | ESCA | 5.06  | 1 | 136 | NA |
| TCGA-IG-A97H | 8.8234757  | 1.1374973 | 1.135682  | 4 | 2 | ESCA | 14.5  | 0 | 98  | NA |
| TCGA-S8-A6BV | 9.71512797 | 3.1064121 | 3.4236208 | 4 | 2 | ESCA | 20    | 0 | 116 | NA |
| TCGA-LN-A7HX | 10.7964593 | 2.9819583 | 1.1921804 | 4 | 2 | ESCA | 12.2  | 0 | 95  | NA |
| TCGA-IG-A3YB | 7.89055677 | 3.058972  | 2.0604929 | 4 | 2 | ESCA | 2.63  | 0 | 74  | NA |
| TCGA-IG-A625 | 8.35017232 | 2.6856287 | 2.6887704 | 4 | 2 | ESCA | 12.8  | 1 | 52  | NA |
| TCGA-LN-A7HW | 9.76792644 | 1.2118869 | 2.1927637 | 4 | 2 | ESCA | 12    | 0 | 88  | NA |
| TCGA-IG-A50L | 9.2448877  | 2.8614787 | 1.6788453 | 4 | 2 | ESCA | 0.53  | 0 | 108 | NA |
| TCGA-LN-A5U5 | 8.65239648 | 1.5589242 | 1.9751627 | 4 | 2 | ESCA | 4.47  | 1 | 50  | NA |
| TCGA-XP-A8T6 | 7.76002516 | 3.1407249 | 4.3004273 | 4 | 2 | ESCA | 25.1  | 1 | 76  | NA |
| TCGA-IG-A3QL | 8.44094776 | -0.200288 | 0.8248129 | 4 | 2 | ESCA | 35.2  | 0 | 84  | NA |
| TCGA-LN-A8I0 | 8.9974897  | 1.6487454 | 2.3814918 | 4 | 2 | ESCA | 13.4  | 0 | 51  | NA |
| TCGA-LN-A7HY | 9.12392224 | 2.6229496 | 2.6219486 | 4 | 2 | ESCA | 12    | 0 | 149 | NA |
| TCGA-LN-A7HZ | 7.94380136 | 1.8283389 | 2.5488771 | 4 | 2 | ESCA | 13.2  | 0 | 65  | NA |
| TCGA-LN-A4A5 | 8.43494916 | 3.4151468 | 3.8974988 | 4 | 2 | ESCA | 22.4  | 1 | 66  | NA |
| TCGA-IG-A4P3 | 8.35333957 | 3.5511083 | 1.6201713 | 4 | 2 | ESCA | 18.6  | 1 | 235 | NA |
| TCGA-VR-A8EZ | 9.1684531  | 0.0474857 | 2.359613  | 4 | 2 | ESCA | 18.2  | 1 | 143 | NA |

|              |            |           |           |   |   |      |       |     |      |      |
|--------------|------------|-----------|-----------|---|---|------|-------|-----|------|------|
| TCGA-LN-A49X | 8.75647831 | 2.7118959 | 2.714397  | 4 | 2 | ESCA | 12.6  | 0   | 67   | NA   |
| TCGA-R6-A6L4 | 10.3837777 | -3.466165 | 1.5237292 | 4 | 2 | ESCA | 16.3  | 1   | 109  | NA   |
| TCGA-L5-A8NK | 7.74861033 | 2.7871376 | 0.9775901 | 4 | 2 | ESCA | 13.5  | 0   | 181  | NA   |
| TCGA-LN-A49U | 8.99380789 | 2.8262827 | 1.8208607 | 4 | 2 | ESCA | 15.3  | 0   | 118  | NA   |
| TCGA-Z6-AAPN | 8.41989982 | 1.29503   | 2.0506834 | 4 | 2 | ESCA | 2.66  | 0   | 333  | NA   |
| TCGA-E5-A4TZ | #####      | #####     | #####     | 4 | 2 | BLCA | 15    | 1   | NA   | NA   |
| TCGA-E7-A7DU | #####      | #####     | #####     | 4 | 2 | BLCA | 1     | 0   | NA   | NA   |
| TCGA-GV-A6ZA | #####      | #NUM!     | #####     | 4 | 2 | BLCA | 23    | 0   | NA   | NA   |
| TCGA-GC-A4ZW | #####      | #####     | #####     | 4 | 2 | BLCA | 0     | 0   | NA   | NA   |
| TCGA-FD-A3N5 | #####      | #####     | #####     | 4 | 2 | BLCA | 23    | 1   | 263  | 48   |
| TCGA-LT-A8JT | #####      | #####     | #####     | 4 | 2 | BLCA | 21    | 0   | NA   | NA   |
| TCGA-FD-A5BV | #####      | #####     | #####     | 4 | 2 | BLCA | 5     | 1   | NA   | NA   |
| TCGA-FT-A3EE | #####      | #####     | #####     | 4 | 2 | BLCA | 3     | 1   | 109  | 31   |
| TCGA-CF-A27C | #####      | #NUM!     | #####     | 4 | 2 | BLCA | 14    | 0   | 130  | 25   |
| TCGA-CF-A5U8 | #####      | #####     | #####     | 4 | 2 | BLCA | 13    | 0   | NA   | NA   |
| TCGA-CU-A72E | #####      | #####     | #####     | 4 | 2 | BLCA | 14    | 1   | NA   | NA   |
| TCGA-CF-A9FF | #####      | #####     | #####     | 4 | 2 | BLCA | 12    | 0   | NA   | NA   |
| TCGA-DK-AA6L | #####      | #####     | #####     | 4 | 2 | BLCA | 38    | 1   | NA   | NA   |
| TCGA-DK-A1AA | #####      | #####     | #####     | 4 | 2 | BLCA | 19    | 0   | 79   | 8    |
| TCGA-CF-A47Y | #####      | #####     | #####     | 4 | 2 | BLCA | 12    | 0   | NA   | NA   |
| TCGA-CF-A47S | #####      | #####     | #####     | 4 | 2 | BLCA | 11    | 0   | NA   | NA   |
| TCGA-CF-A8HY | #####      | #####     | #####     | 4 | 2 | BLCA | 11    | 0   | NA   | NA   |
| TCGA-CF-A47T | #####      | #####     | #####     | 4 | 2 | BLCA | 13    | 1   | NA   | NA   |
| TCGA-DK-AA6W | #####      | #NUM!     | #####     | 4 | 2 | BLCA | 14    | 1   | NA   | NA   |
| TCGA-ZF-A9R0 | #####      | #####     | #####     | 4 | 2 | BLCA | 22    | 1   | NA   | NA   |
| TCGA-XF-A8HI | #####      | #####     | #####     | 4 | 2 | BLCA | 18    | 1   | NA   | NA   |
| TCGA-FD-A3N6 | #####      | #####     | #####     | 4 | 2 | BLCA | 28    | 0   | NA   | 25   |
| TCGA-ZF-A9R5 | #####      | #NUM!     | #####     | 4 | 2 | BLCA | 36    | 0   | NA   | NA   |
| TCGA-GU-A42C | #####      | #####     | #####     | 4 | 2 | BLCA | 11    | 1   | NA   | NA   |
| TCGA-E7-A8O7 | #####      | #####     | #####     | 4 | 2 | BLCA | 15    | 0   | NA   | NA   |
| TCGA-GD-A3OC | #####      | #NUM!     | #####     | 4 | 2 | BLCA | 21    | 0   | 85   | 19   |
| TCGA-ZF-A9R3 | #####      | #####     | #####     | 4 | 2 | BLCA | 31    | 1   | NA   | NA   |
| TCGA-XF-A9T5 | #####      | #####     | #####     | 4 | 2 | BLCA | 67    | 0   | NA   | NA   |
| TCGA-XF-AAN3 | #####      | #####     | #####     | 4 | 2 | BLCA | 86    | 0   | NA   | NA   |
| TCGA-5N-A9KM | #####      | #####     | #####     | 4 | 2 | BLCA | 17    | 1   | NA   | NA   |
| TCGA-DK-A3IT | #####      | #####     | #####     | 4 | 2 | BLCA | 21    | 0   | 379  | 85   |
| TCGA-UY-A8OE | #####      | #####     | #####     | 4 | 2 | BLCA | 69    | 0   | NA   | NA   |
| 4            | #####      | #####     | #####     | 4 | 2 | BLCA | 5     | 0   | #N/A | #N/A |
| TCGA-KK-A6E4 | 7.573631   | -0.140666 | 3.813586  | 4 | 2 | PRAD | ####  | 1.0 | 36   | 6    |
| TCGA-KK-A7AW | 7.065408   | 0.855990  | 3.762848  | 4 | 2 | PRAD | 34.63 | 0.0 | NA   | NA   |
| TCGA-J4-A67K | 6.971549   | 0.586404  | 3.586404  | 4 | 2 | PRAD | 32.98 | 0.0 | 34   | 6    |
| TCGA-G9-6365 | 7.210529   | 1.040612  | 3.584926  | 4 | 2 | PRAD | 44.78 | 0.0 | 72   | 7    |
| TCGA-2A-A8VL | 7.545885   | 1.042427  | 3.501885  | 4 | 2 | PRAD | 20.40 | 0.0 | NA   | NA   |
| TCGA-J4-A67S | 6.884203   | 0.571337  | 3.478208  | 4 | 2 | PRAD | 27.37 | 0.0 | 21   | 2    |
| TCGA-YL-A8SQ | 7.427831   | 0.721066  | 3.136058  | 4 | 2 | PRAD | 68.43 | 0.0 | NA   | NA   |
| TCGA-EJ-A65E | 6.758687   | 0.913416  | 2.913378  | 4 | 2 | PRAD | 13.70 | 0.0 | 35   | 15   |
| TCGA-ZG-A9L4 | 7.336984   | 0.574140  | 2.822055  | 4 | 2 | PRAD | 36.40 | 0.0 | NA   | NA   |
| TCGA-V1-A9Z9 | 7.106610   | 0.140779  | 2.725783  | 4 | 2 | PRAD | 17.74 | 0.0 | NA   | NA   |
| TCGA-V1-A9ZG | 6.609580   | 0.553262  | 2.723143  | 4 | 2 | PRAD | 49.84 | 0.0 | NA   | NA   |
| TCGA-V1-A9Z8 | 6.698217   | 0.698218  | 2.698218  | 4 | 2 | PRAD | 27.17 | 0.0 | NA   | NA   |
| TCGA-KK-A8IB | 7.212229   | 1.077783  | 2.662773  | 4 | 2 | PRAD | 2.73  | 0.0 | NA   | NA   |
| TCGA-HC-A9TE | 7.010261   | 0.889006  | 2.625923  | 4 | 2 | PRAD | 19.28 | 0.0 | NA   | NA   |
| TCGA-EJ-7312 | 7.082677   | -0.698787 | 2.623232  | 4 | 2 | PRAD | 36.10 | 0.0 | NA   | NA   |
| TCGA-WW-A8ZI | 7.055462   | -0.658834 | 2.511139  | 4 | 2 | PRAD | 14.75 | 0.0 | NA   | NA   |

|              |          |           |          |   |   |      |       |     |     |    |
|--------------|----------|-----------|----------|---|---|------|-------|-----|-----|----|
| TCGA-EJ-5526 | 7.282408 | 1.007834  | 2.510326 | 4 | 2 | PRAD | 62.71 | 0.0 | 24  | 9  |
| TCGA-EJ-8468 | 7.441703 | -0.517069 | 2.482975 | 4 | 2 | PRAD | 77.10 | 0.0 | 48  | 4  |
| TCGA-J4-AAU2 | 7.313911 | -1.025941 | 2.433494 | 4 | 2 | PRAD | 27.10 | 0.0 | NA  | NA |
| TCGA-HC-7078 | 7.559349 | 0.807759  | 2.392754 | 4 | 2 | PRAD | 65.21 | 0.0 | 44  | 8  |
| TCGA-HC-A632 | 7.027491 | 0.641731  | 2.378734 | 4 | 2 | PRAD | 2.00  | 0.0 | 38  | 10 |
| TCGA-QU-A6IO | 6.779918 | #NUM!     | 2.342526 | 4 | 2 | PRAD | ####  | 0.0 | 32  | 4  |
| TCGA-HC-A8D1 | 7.476534 | -0.002888 | 2.319040 | 4 | 2 | PRAD | 18.82 | 0.0 | NA  | NA |
| TCGA-EJ-7125 | 7.260819 | 1.049484  | 2.312488 | 4 | 2 | PRAD | 93.63 | 0.0 | 48  | 8  |
| TCGA-V1-A8WS | 7.288662 | #NUM!     | 2.303781 | 4 | 2 | PRAD | 15.57 | 0.0 | NA  | NA |
| TCGA-V1-A9OT | 6.733124 | 0.411209  | 2.218564 | 4 | 2 | PRAD | 15.64 | 0.0 | NA  | NA |
| TCGA-VP-A879 | 7.577096 | 0.458161  | 2.195124 | 4 | 2 | PRAD | 23.92 | 1.0 | NA  | NA |
| TCGA-J4-A67L | 7.042901 | 0.734560  | 2.193992 | 4 | 2 | PRAD | 25.30 | 0.0 | 31  | 10 |
| TCGA-KC-A7FA | 6.628787 | -1.015083 | 2.154839 | 4 | 2 | PRAD | 19.65 | 0.0 | NA  | NA |
| TCGA-HC-7752 | 6.282355 | #NUM!     | 2.153059 | 4 | 2 | PRAD | 25.69 | 0.0 | 82  | 15 |
| TCGA-SU-A7E7 | 6.643856 | 0.823668  | 2.145612 | 4 | 2 | PRAD | 18.10 | 0.0 | NA  | NA |
| TCGA-FC-A8O0 | 7.436765 | -1.057992 | 2.111966 | 4 | 2 | PRAD | 20.24 | 0.0 | NA  | NA |
| TCGA-KC-A4BL | 7.163601 | 0.352307  | 2.089261 | 4 | 2 | PRAD | 30.68 | 0.0 | 28  | 7  |
| TCGA-HC-A4ZV | 7.217845 | 0.470917  | 2.055890 | 4 | 2 | PRAD | 0.76  | 0.0 | 102 | 44 |
| TCGA-QU-A6IM | 6.257346 | -0.537005 | 2.047884 | 4 | 2 | PRAD | 40.97 | 0.0 | 71  | 11 |
| TCGA-KK-A8IL | 7.147383 | 0.843582  | 2.013534 | 4 | 2 | PRAD | 20.63 | 1.0 | NA  | NA |
| TCGA-HC-7209 | 7.469777 | -0.369054 | 1.952893 | 4 | 2 | PRAD | 14.45 | 0.0 | 28  | 4  |
| TCGA-KC-A7F6 | 7.040626 | -0.088209 | 1.911845 | 4 | 2 | PRAD | 8.64  | 0.0 | NA  | NA |
| TCGA-CH-5746 | 7.463772 | 0.008200  | 1.882682 | 4 | 2 | PRAD | 24.01 | 0.0 | 33  | 10 |
| TCGA-EJ-AB27 | 7.299688 | 0.955759  | 1.862670 | 4 | 2 | PRAD | 4.76  | 0.0 | NA  | NA |
| TCGA-EJ-A65G | 7.386657 | #NUM!     | 1.796681 | 4 | 2 | PRAD | 21.88 | 0.0 | 31  | 4  |
| TCGA-V1-A9ZI | 7.130087 | #NUM!     | 1.793355 | 4 | 2 | PRAD | 53.88 | 0.0 | NA  | NA |
| TCGA-M7-A721 | 7.505298 | 0.547252  | 1.769602 | 4 | 2 | PRAD | 13.14 | 0.0 | NA  | NA |
| TCGA-V1-A8MG | 7.134365 | 0.416948  | 1.738898 | 4 | 2 | PRAD | 28.15 | 0.0 | NA  | NA |
| TCGA-J9-A8CP | 6.568927 | 0.481506  | 1.703849 | 4 | 2 | PRAD | 12.68 | 0.0 | NA  | NA |
| TCGA-V1-A8MF | 7.198369 | 0.957320  | 1.694301 | 4 | 2 | PRAD | 47.60 | 0.0 | NA  | NA |
| TCGA-VN-A88O | 7.186123 | 0.879149  | 1.686518 | 4 | 2 | PRAD | 15.80 | 0.0 | NA  | NA |
| TCGA-EJ-8472 | 7.424052 | -0.561516 | 1.608478 | 4 | 2 | PRAD | 24.84 | 0.0 | 103 | 17 |
| TCGA-J4-A83N | 7.246106 | -0.001443 | 1.583514 | 4 | 2 | PRAD | 32.59 | 0.0 | NA  | NA |
| TCGA-EJ-A65F | 7.138118 | 0.356707  | 1.579127 | 4 | 2 | PRAD | 18.40 | 0.0 | 70  | 14 |
| TCGA-G9-6494 | 7.062470 | 1.036813  | 1.522252 | 4 | 2 | PRAD | 58.18 | 0.0 | 75  | 7  |
| TCGA-M7-A722 | 6.743534 | 1.061707  | 1.476739 | 4 | 2 | PRAD | 34.82 | 0.0 | NA  | NA |
| TCGA-J9-A52E | 7.017097 | 0.713335  | 1.450274 | 4 | 2 | PRAD | 10.61 | 0.0 | 24  | 10 |
| TCGA-EJ-A7NM | 7.241437 | 0.959770  | 1.445144 | 4 | 2 | PRAD | 4.20  | 0.0 | NA  | NA |
| TCGA-XK-AAJR | 7.105805 | 1.018342  | 1.380951 | 4 | 2 | PRAD | 36.93 | 0.0 | NA  | NA |
| TCGA-EJ-5510 | 7.068543 | 0.371615  | 1.371553 | 4 | 2 | PRAD | 61.99 | 0.0 | 22  | 9  |
| TCGA-J9-A52B | 7.551524 | 0.608989  | 1.345958 | 4 | 2 | PRAD | 13.86 | 0.0 | 37  | 3  |
| TCGA-V1-A9ZK | 7.158497 | 0.847997  | 1.333424 | 4 | 2 | PRAD | 45.43 | 0.0 | NA  | NA |
| TCGA-KK-A8IJ | 6.408652 | 0.729183  | 1.314111 | 4 | 2 | PRAD | 51.22 | 0.0 | NA  | NA |
| TCGA-KC-A7F3 | 7.067287 | -1.280685 | 1.304155 | 4 | 2 | PRAD | 21.85 | 0.0 | NA  | NA |
| TCGA-V1-A8MM | 6.805735 | 0.972832  | 1.294777 | 4 | 2 | PRAD | 39.26 | 0.0 | NA  | NA |
| TCGA-Y6-A9XI | 6.745436 | 0.971442  | 1.293370 | 4 | 2 | PRAD | 17.28 | 0.0 | NA  | NA |
| TCGA-EJ-A65M | 6.845398 | -0.043349 | 1.278580 | 4 | 2 | PRAD | 7.56  | 0.0 | 41  | 6  |
| TCGA-HI-7168 | 7.302187 | 0.980537  | 1.243541 | 4 | 2 | PRAD | ####  | 0.0 | 38  | 8  |
| TCGA-HC-8261 | 7.251690 | 1.013284  | 1.235666 | 4 | 2 | PRAD | 17.94 | 0.0 | 31  | 8  |
| TCGA-KK-A8I6 | 7.330329 | 0.212009  | 1.212009 | 4 | 2 | PRAD | 21.94 | 0.0 | NA  | NA |
| TCGA-HC-7749 | 7.198888 | 0.204642  | 1.204642 | 4 | 2 | PRAD | 23.78 | 0.0 | 70  | 12 |
| TCGA-VP-A87B | 7.211501 | 0.161694  | 1.161623 | 4 | 2 | PRAD | 89.42 | 0.0 | NA  | NA |
| TCGA-KK-A59Y | 6.697946 | 0.728312  | 1.143322 | 4 | 2 | PRAD | 64.65 | 0.0 | 21  | 6  |
| TCGA-G9-6342 | 7.243056 | 0.861161  | 1.124196 | 4 | 2 | PRAD | 55.72 | 0.0 | 42  | 3  |



|              |          |           |          |   |   |      |       |     |      |      |
|--------------|----------|-----------|----------|---|---|------|-------|-----|------|------|
| TCGA-G9-6385 | 7.446682 | 0.501210  | 1.086172 | 4 | 2 | PRAD | 27.27 | 0.0 | 45   | 4    |
| TCGA-G9-6363 | 6.934307 | #NUM!     | 1.039482 | 4 | 2 | PRAD | 45.27 | 0.0 | 64   | 9    |
| TCGA-KK-A5A1 | 7.271761 | -0.013625 | 0.986375 | 4 | 2 | PRAD | 81.11 | 1.0 | #N/A | #N/A |
| TCGA-EJ-7218 | 7.004289 | -0.635540 | 0.949423 | 4 | 2 | PRAD | 83.51 | 0.0 | NA   | NA   |
| TCGA-EJ-7317 | 7.129204 | #NUM!     | 0.940054 | 4 | 2 | PRAD | 25.33 | 0.0 | 76   | 7    |
| TCGA-G9-7521 | 6.961431 | 0.939076  | 0.939076 | 4 | 2 | PRAD | 30.95 | 0.0 | 36   | 11   |
| TCGA-H9-A6BY | 7.244409 | -1.081950 | 0.918005 | 4 | 2 | PRAD | 3.68  | 0.0 | 33   | 7    |
| TCGA-ZG-A9LU | 6.733735 | 0.913562  | 0.913562 | 4 | 2 | PRAD | 19.02 | 0.0 | NA   | NA   |
| TCGA-EJ-7123 | 6.833430 | -0.177409 | 0.822600 | 4 | 2 | PRAD | 84.49 | 0.0 | 94   | 12   |
| TCGA-VN-A88M | 7.171841 | -0.776479 | 0.808426 | 4 | 2 | PRAD | 6.21  | 0.0 | NA   | NA   |
| TCGA-J4-A83J | 7.208135 | 0.775346  | 0.775346 | 4 | 2 | PRAD | 22.86 | 0.0 | NA   | NA   |
| TCGA-EJ-A7NK | 6.966600 | 0.178734  | 0.763667 | 4 | 2 | PRAD | 15.64 | 0.0 | NA   | NA   |
| TCGA-HC-A6AL | 6.874802 | 0.346066  | 0.761030 | 4 | 2 | PRAD | 2.20  | 0.0 | 38   | 11   |
| TCGA-CH-5750 | 7.534639 | #NUM!     | 0.757962 | 4 | 2 | PRAD | 13.01 | 0.0 | 45   | 11   |
| TCGA-J9-A8CN | 6.602984 | 0.160017  | 0.745014 | 4 | 2 | PRAD | 40.64 | 0.0 | NA   | NA   |
| TCGA-VN-A88K | 6.630068 | -1.258080 | 0.741920 | 4 | 2 | PRAD | 25.49 | 0.0 | NA   | NA   |
| TCGA-2A-A8W3 | 6.828812 | -1.290215 | 0.709899 | 4 | 2 | PRAD | 28.35 | 0.0 | NA   | NA   |
| TCGA-KC-A7FD | 7.360634 | 0.187768  | 0.602732 | 4 | 2 | PRAD | 8.87  | 0.0 | NA   | NA   |
| TCGA-M7-A71Z | 6.847710 | -0.982534 | 0.602362 | 4 | 2 | PRAD | 21.12 | 0.0 | NA   | NA   |
| TCGA-HC-8265 | 6.885168 | 0.575603  | 0.575603 | 4 | 2 | PRAD | 15.87 | 0.0 | 64   | 18   |
| TCGA-XJ-A9DI | 7.328746 | 0.552869  | 0.552869 | 4 | 2 | PRAD | 48.00 | 0.0 | NA   | NA   |
| TCGA-EJ-7315 | 7.091686 | 1.016561  | 0.531169 | 4 | 2 | PRAD | 33.11 | 0.0 | 59   | 10   |
| TCGA-XK-AAJ3 | 7.157429 | 0.490365  | 0.490365 | 4 | 2 | PRAD | 41.46 | 0.0 | NA   | NA   |
| TCGA-XJ-A83G | 6.839502 | #NUM!     | 0.473215 | 4 | 2 | PRAD | 48.00 | 0.0 | NA   | NA   |
| TCGA-KK-A7AY | 6.692098 | #NUM!     | 0.472893 | 4 | 2 | PRAD | 57.62 | 0.0 | NA   | NA   |
| TCGA-ZG-A9ND | 6.771961 | -0.531802 | 0.468218 | 4 | 2 | PRAD | 13.47 | 0.0 | NA   | NA   |
| TCGA-VN-A88N | 6.332606 | -1.118727 | 0.466330 | 4 | 2 | PRAD | 25.16 | 0.0 | NA   | NA   |
| TCGA-G9-6332 | 7.242684 | -1.187707 | 0.397146 | 4 | 2 | PRAD | 87.29 | 0.0 | 54   | 8    |
| TCGA-G9-6362 | 6.887494 | -0.612417 | 0.387693 | 4 | 2 | PRAD | 47.40 | 0.0 | 53   | 5    |
| TCGA-2A-AAYF | 7.080393 | 0.348572  | 0.348572 | 4 | 2 | PRAD | 44.81 | 0.0 | NA   | NA   |
| TCGA-CH-5748 | 7.248537 | -1.261915 | 0.323070 | 4 | 2 | PRAD | 1.02  | 0.0 | 38   | 14   |
| TCGA-EJ-7784 | 7.543347 | -1.692455 | 0.307545 | 4 | 2 | PRAD | 25.66 | 0.0 | 115  | 14   |
| TCGA-HC-A8CY | 7.105676 | 0.671837  | 0.256890 | 4 | 2 | PRAD | 9.53  | 0.0 | NA   | NA   |
| TCGA-EJ-A46F | 6.959837 | 0.218595  | 0.218595 | 4 | 2 | PRAD | 25.72 | 0.0 | 33   | 6    |
| TCGA-2L-AAQE | 8.4085   | 2.5907    | 1.6976   | 4 | 2 | PAAD | 22.47 | 1.0 | 62   | NA   |
| TCGA-RB-AA9M | 9.5687   | 2.5870    | 1.3646   | 4 | 2 | PAAD | 9.40  | 0.0 | 65   | NA   |
| TCGA-IB-AAUW | 9.3260   | 2.4608    | 1.9754   | 4 | 2 | PAAD | 7.56  | 1.0 | NA   | NA   |
| TCGA-Q3-A5QY | 9.0615   | 2.4110    | 1.8964   | 4 | 2 | PAAD | 13.67 | 0.0 | 67   | NA   |
| TCGA-XD-AAUI | 9.5850   | 2.3083    | 1.3083   | 4 | 2 | PAAD | 12.02 | 1.0 | 60   | NA   |
| TCGA-2J-AABV | 9.3929   | 2.2401    | 2.2401   | 4 | 2 | PAAD | 21.42 | 1.0 | 48   | NA   |
| TCGA-2L-AAQL | 9.5661   | 2.1788    | 1.6934   | 4 | 2 | PAAD | 9.59  | 1.0 | 82   | NA   |
| TCGA-FB-AAQ3 | 9.5382   | 2.1717    | 4.7567   | 4 | 2 | PAAD | 1.02  | 1.0 | 65   | NA   |
| TCGA-3E-AAAY | 9.1501   | 2.1336    | 2.7710   | 4 | 2 | PAAD | 75.07 | 0.0 | 39   | NA   |
| TCGA-FB-AAPZ | 9.2175   | 2.1193    | 1.1192   | 4 | 2 | PAAD | 23.52 | 0.0 | 58   | NA   |
| TCGA-2J-AABK | 9.7170   | 2.1041    | 1.1041   | 4 | 2 | PAAD | 15.90 | 0.0 | 56   | NA   |
| TCGA-FB-AAQ1 | 8.8527   | 1.8063    | 1.8063   | 4 | 2 | PAAD | 4.04  | 1.0 | 50   | NA   |
| TCGA-F2-A44H | 8.5830   | 1.7466    | 2.7466   | 4 | 2 | PAAD | 19.25 | 0.0 | 20   | NA   |
| TCGA-XD-AAUL | 9.6385   | 1.7340    | 1.9039   | 4 | 2 | PAAD | 16.36 | 0.0 | 61   | NA   |
| TCGA-HZ-A8P0 | 9.7214   | 1.7331    | 0.9962   | 4 | 2 | PAAD | 0.00  | 0.0 | 71   | NA   |
| TCGA-HZ-8638 | 9.5485   | 1.6613    | 1.1467   | 4 | 2 | PAAD | 4.96  | 1.0 | NA   | NA   |
| TCGA-US-A779 | 9.6696   | 1.5959    | 1.0109   | 4 | 2 | PAAD | 16.79 | 1.0 | 89   | NA   |
| TCGA-IB-AAUM | 9.3207   | 1.5197    | 1.8417   | 4 | 2 | PAAD | 0.26  | 0.0 | 46   | NA   |
| TCGA-3A-A9IL | 7.5158   | 1.1008    | 1.4228   | 4 | 2 | PAAD | 90.05 | 0.0 | NA   | NA   |
| TCGA-LB-A8F3 | 9.2533   | 1.0218    | 2.6068   | 4 | 2 | PAAD | 12.45 | 0.0 | 92   | NA   |

|              |          |           |           |   |   |            |       |     |      |      |
|--------------|----------|-----------|-----------|---|---|------------|-------|-----|------|------|
| TCGA-IB-A6UF | 8.4406   | 0.9466    | 2.5316    | 4 | 2 | PAAD       | 21.88 | 0.0 | 104  | NA   |
| TCGA-3A-A9IR | 7.4712   | 0.7835    | 13.2470   | 4 | 2 | PAAD       | 50.66 | 0.0 | NA   | NA   |
| TCGA-HV-A5A3 | 8.8697   | 0.6390    | 1.6390    | 4 | 2 | PAAD       | 4.20  | 1.0 | 46   | NA   |
| TCGA-F9-A4JJ | 5.163700 | 0.013927  | 0.013927  | 4 | 2 | KIRP       | 11    | 1.0 | 36   | 4    |
| TCGA-J7-A8I2 | 5.848483 | -0.399352 | -0.399369 | 4 | 2 | KIRP       | 10    | 0.0 | NA   | NA   |
| TCGA-P4-AAVL | 7.650772 | -0.446738 | 0.553262  | 4 | 2 | KIRP       | 16    | 1.0 | NA   | NA   |
| TCGA-BQ-5888 | 7.285490 | -0.923851 | 0.076285  | 4 | 2 | KIRP       | 13    | 0.0 | 74   | 3    |
| TCGA-F9-A8NY | 4.933879 | -1.153607 | -0.153607 | 4 | 2 | KIRP       | 1     | 0.0 | NA   | NA   |
| TCGA-5P-A9JU | 7.622004 | -1.303294 | 1.018563  | 4 | 2 | KIRP       | 12    | 0.0 | NA   | NA   |
| TCGA-BQ-5875 | 6.972049 | -1.326986 | -1.326986 | 4 | 2 | KIRP       | 87    | 0.0 | 80   | 14   |
| TCGA-G7-6793 | 5.211472 | -1.646564 | -0.646564 | 4 | 2 | KIRP       | 11    | 1.0 | NA   | 10   |
| TCGA-SX-A71R | 8.174331 | #NUM!     | -0.673923 | 4 | 2 | KIRP       | 48    | 0.0 | NA   | NA   |
| TCGA-AL-3468 | 7.961328 | #NUM!     | 0.303109  | 4 | 2 | KIRP       | 77    | 1.0 | NA   | 16   |
| TCGA-P4-AAVO | 7.869894 | #NUM!     | 0.898317  | 4 | 2 | KIRP       | 79    | 0.0 | 81   | NA   |
| TCGA-2Z-A9J3 | 7.274017 | #NUM!     | -1.466337 | 4 | 2 | KIRP       | 58    | 1.0 | NA   | NA   |
| TCGA-UZ-A9PQ | 6.372061 | #NUM!     | -1.375572 | 4 | 2 | KIRP       | 86    | 1.0 | NA   | NA   |
| TCGA-AY-4071 | #####    | #####     | #####     | 4 | 2 | ot Availab | 1     | 1.0 | #N/A | #N/A |
| TCGA-CM-5861 | #####    | #####     | #####     | 4 | 2 | Colon      | 15    | 0.0 | 561  | NA   |
| TCGA-AA-3811 | #####    | #####     | #####     | 4 | 2 | Colon      | 10    | 1.0 | #N/A | #N/A |
| TCGA-CM-5341 | #####    | #####     | #####     | 4 | 2 | Colon      | 29    | 0.0 | #N/A | #N/A |
| TCGA-AA-3845 | #####    | #####     | #####     | 4 | 2 | Colon      | 0     | 1.0 | #N/A | #N/A |
| TCGA-AZ-6607 | #####    | #####     | #####     | 4 | 2 | Colon      | 3     | 1.0 | 23   | NA   |
| TCGA-AA-3542 | #####    | #####     | #####     | 4 | 2 | Colon      | 13    | 0.0 | #N/A | #N/A |
| TCGA-A6-3810 | #####    | #####     | #####     | 4 | 2 | Colon      | 37    | 0.0 | #N/A | #N/A |
| TCGA-A6-2686 | #####    | #####     | #####     | 4 | 2 | Colon      | 37    | 1.0 | NA   | NA   |
| TCGA-AD-6901 | #####    | #####     | #####     | 4 | 2 | Colon      | 22    | 1.0 | 92   | NA   |
| TCGA-DM-A1DC | #####    | #####     | #####     | 4 | 2 | Colon      | 131   | 0.0 | 41   | NA   |
| TCGA-AA-3860 | #####    | #####     | #####     | 4 | 2 | Colon      | 31    | 0.0 | #N/A | #N/A |
| TCGA-AA-3514 | #####    | #####     | #####     | 4 | 2 | Colon      | 1     | 0.0 | #N/A | #N/A |
| TCGA-AA-A03J | #####    | #####     | #####     | 4 | 2 | Colon      | 41    | 0.0 | #N/A | #N/A |
| TCGA-F4-6809 | #####    | #####     | #####     | 4 | 2 | Colon      | 13    | 1.0 | 50   | NA   |
| TCGA-G4-6317 | #####    | #####     | #####     | 4 | 2 | Colon      | 36    | 0.0 | 41   | NA   |
| TCGA-AA-3872 | #####    | #####     | #####     | 4 | 2 | Colon      | 0     | 0.0 | #N/A | #N/A |
| TCGA-G4-6299 | #####    | #####     | #####     | 4 | 2 | Colon      | 75    | 0.0 | 58   | NA   |
| TCGA-A6-6649 | #####    | #####     | #####     | 4 | 2 | Colon      | 24    | 0.0 | 54   | NA   |
| TCGA-D5-6926 | #####    | #####     | #####     | 4 | 2 | Colon      | 9     | 0.0 | 46   | NA   |
| TCGA-AA-A017 | #####    | #####     | #####     | 4 | 2 | Colon      | 15    | 0.0 | #N/A | #N/A |
| TCGA-AA-3518 | #####    | #####     | #####     | 4 | 2 | Colon      | 1     | 0.0 | #N/A | #N/A |
| TCGA-CM-4752 | #####    | #####     | #####     | 4 | 2 | Colon      | 13    | 0.0 | #N/A | #N/A |
| TCGA-AA-3544 | #####    | #####     | #####     | 4 | 2 | Colon      | 14    | 0.0 | #N/A | #N/A |
| TCGA-QG-A5Z1 | #####    | #####     | #####     | 4 | 2 | Colon      | 8     | 1.0 | NA   | NA   |
| TCGA-AA-3680 | #####    | #####     | #####     | 4 | 2 | Colon      | 11    | 1.0 | #N/A | #N/A |
| TCGA-AA-3538 | #####    | #####     | #####     | 4 | 2 | Colon      | 26    | 0.0 | #N/A | #N/A |
| TCGA-AA-3833 | #####    | #####     | #####     | 4 | 2 | Colon      | 16    | 0.0 | #N/A | #N/A |
| TCGA-D5-6922 | #####    | #####     | #####     | 4 | 2 | Colon      | 10    | 0.0 | 38   | NA   |
| TCGA-G4-6310 | #####    | #####     | #####     | 4 | 2 | Colon      | 64    | 0.0 | 38   | NA   |
| TCGA-AA-3520 | #####    | #####     | #####     | 4 | 2 | Colon      | 24    | 0.0 | #N/A | #N/A |
| TCGA-AA-3560 | #####    | #####     | #####     | 4 | 2 | Colon      | 20    | 0.0 | #N/A | #N/A |
| TCGA-D5-6529 | #####    | #####     | #####     | 4 | 2 | Colon      | 20    | 0.0 | 32   | NA   |
| TCGA-CA-6716 | #####    | #####     | #####     | 4 | 2 | Colon      | 12    | 0.0 | 65   | NA   |
| TCGA-CM-6679 | #####    | #####     | #####     | 4 | 2 | Colon      | 10    | 0.0 | 21   | NA   |
| TCGA-A6-4107 | #####    | #####     | #####     | 4 | 2 | Colon      | 32    | 0.0 | #N/A | #N/A |
| TCGA-AD-6965 | #####    | #####     | #####     | 4 | 2 | Colon      | 26    | 0.0 | 46   | NA   |
| TCGA-AA-3814 | #####    | #####     | #####     | 4 | 2 | Colon      | 0     | 0.0 | #N/A | #N/A |

|              |         |         |          |   |   |       |     |     |      |      |
|--------------|---------|---------|----------|---|---|-------|-----|-----|------|------|
| TCGA-AA-3975 | #####   | #####   | #####    | 4 | 2 | Colon | 34  | 0.0 | #N/A | #N/A |
| TCGA-F4-6569 | #####   | #####   | #####    | 4 | 2 | Colon | 36  | 0.0 | 40   | NA   |
| TCGA-AA-A01Z | #####   | #####   | #####    | 4 | 2 | Colon | 37  | 0.0 | NA   | NA   |
| TCGA-AA-3664 | #####   | #####   | #####    | 4 | 2 | Colon | 54  | 0.0 | #N/A | #N/A |
| TCGA-AA-3675 | #####   | #####   | #####    | 4 | 2 | Colon | 47  | 0.0 | NA   | NA   |
| TCGA-AA-3875 | #####   | #####   | #####    | 4 | 2 | Colon | 18  | 0.0 | #N/A | #N/A |
| TCGA-CM-4746 | #####   | #####   | #####    | 4 | 2 | Colon | 37  | 0.0 | #N/A | #N/A |
| TCGA-CA-5797 | #####   | #####   | #####    | 4 | 2 | Colon | 13  | 0.0 | 24   | NA   |
| TCGA-AA-A02W | #####   | #####   | #####    | 4 | 2 | Colon | 41  | 0.0 | #N/A | #N/A |
| TCGA-AZ-4684 | #####   | #####   | #####    | 4 | 2 | Colon | 65  | 0.0 | NA   | NA   |
| TCGA-A6-2672 | #####   | #####   | #####    | 4 | 2 | Colon | 47  | 0.0 | #N/A | #N/A |
| TCGA-AA-3855 | #####   | #####   | #####    | 4 | 2 | Colon | 32  | 0.0 | #N/A | #N/A |
| TCGA-AA-3525 | #####   | #####   | #####    | 4 | 2 | Colon | 8   | 0.0 | #N/A | #N/A |
| TCGA-AZ-6605 | #####   | #####   | #####    | 4 | 2 | Colon | 5   | 1.0 | 40   | NA   |
| TCGA-D5-6539 | #####   | #####   | #####    | 4 | 2 | Colon | 12  | 0.0 | 18   | NA   |
| TCGA-AA-A01F | #####   | #####   | #####    | 4 | 2 | Colon | 32  | 0.0 | #N/A | #N/A |
| TCGA-AA-A00F | #####   | #####   | #####    | 4 | 2 | Colon | 34  | 0.0 | #N/A | #N/A |
| TCGA-F4-6806 | #####   | #####   | #####    | 4 | 2 | Colon | 41  | 0.0 | 34   | NA   |
| TCGA-CM-6168 | #####   | #####   | #####    | 4 | 2 | Colon | 13  | 0.0 | 67   | NA   |
| TCGA-AA-3488 | #####   | #####   | #####    | 4 | 2 | Colon | 5   | 1.0 | #N/A | #N/A |
| TCGA-A6-5664 | #####   | #####   | #####    | 4 | 2 | Colon | 22  | 0.0 | 15   | NA   |
| TCGA-AZ-6598 | #####   | #NUM!   | #####    | 4 | 2 | Colon | 49  | 1.0 | 1087 | NA   |
| TCGA-DM-A0X9 | #####   | #####   | #####    | 4 | 2 | Colon | 120 | 0.0 | 67   | NA   |
| TCGA-AA-3986 | #####   | #####   | #####    | 4 | 2 | Colon | 19  | 0.0 | #N/A | #N/A |
| TCGA-AA-3519 | #####   | #####   | #####    | 4 | 2 | Colon | 9   | 0.0 | #N/A | #N/A |
| TCGA-AA-3517 | #####   | #####   | #####    | 4 | 2 | Colon | 39  | 0.0 | #N/A | #N/A |
| TCGA-AA-3818 | #####   | #####   | #####    | 4 | 2 | Colon | 1   | 1.0 | #N/A | #N/A |
| TCGA-D5-6534 | #####   | #####   | #####    | 4 | 2 | Colon | 43  | 0.0 | 56   | NA   |
| TCGA-AA-3516 | #####   | #####   | #####    | 4 | 2 | Colon | 13  | 1.0 | #N/A | #N/A |
| TCGA-AA-3877 | #####   | #####   | #####    | 4 | 2 | Colon | 31  | 0.0 | #N/A | #N/A |
| TCGA-CM-5863 | #####   | #####   | #####    | 4 | 2 | Colon | 15  | 0.0 | 34   | NA   |
| TCGA-NH-A6GC | #####   | #####   | #####    | 4 | 2 | Colon | 13  | 0.0 | NA   | NA   |
| TCGA-AA-3692 | #####   | #####   | #####    | 4 | 2 | Colon | 36  | 1.0 | #N/A | #N/A |
| TCGA-F4-6704 | #####   | #####   | #####    | 4 | 2 | Colon | 2   | 0.0 | 17   | NA   |
| TCGA-A6-A565 | #####   | #####   | #####    | 4 | 2 | Colon | 16  | 1.0 | NA   | NA   |
| TCGA-E9-A1R4 | 8.86825 | 3.30409 | -0.02248 | 1 | 4 | BRCA  | 6.1 | 0   | 77   | 16   |
| TCGA-4N-A93T | #####   | #####   | #NUM!    | 1 | 4 | Colon | 5   | 0.0 | NA   | NA   |
| TCGA-G4-6309 | #####   | #####   | #NUM!    | 1 | 4 | Colon | 85  | 0.0 | 334  | NA   |
| TCGA-DM-A28C | #####   | #####   | #####    | 1 | 4 | Colon | 81  | 1.0 | 38   | NA   |
| TCGA-AA-A01P | #####   | #####   | #####    | 1 | 4 | Colon | 38  | 1.0 | NA   | NA   |
| TCGA-DM-A1DE | #####   | #####   | #NUM!    | 1 | 4 | Colon | 44  | 1.0 | 22   | NA   |
| TCGA-AD-6888 | #####   | #####   | #NUM!    | 1 | 4 | Colon | 16  | 1.0 | 50   | NA   |
| TCGA-AA-3848 | #####   | #####   | #####    | 1 | 4 | Colon | 10  | 1.0 | #N/A | #N/A |
| TCGA-A6-2682 | #####   | #####   | #####    | 1 | 4 | Colon | 14  | 1.0 | NA   | NA   |
| TCGA-AM-5821 | #####   | #####   | #####    | 1 | 4 | Colon | 1   | 0.0 | 1339 | NA   |
| TCGA-AZ-5403 | #####   | #####   | #####    | 1 | 4 | Colon | 63  | 1.0 | 30   | NA   |
| TCGA-D5-6929 | #####   | #####   | #####    | 1 | 4 | Colon | 13  | 0.0 | 49   | NA   |
| TCGA-AA-A00W | #####   | #####   | #####    | 1 | 4 | Colon | 15  | 0.0 | #N/A | #N/A |
| TCGA-DM-A28V | #####   | #####   | #####    | 1 | 4 | Colon | 95  | 0.0 | 43   | NA   |
| TCGA-AA-3930 | #####   | #####   | #####    | 1 | 4 | Colon | 2   | 1.0 | #N/A | #N/A |
| TCGA-AZ-6608 | #####   | #####   | #NUM!    | 1 | 4 | Colon | 2   | 1.0 | NA   | NA   |
| TCGA-NH-A5IV | #####   | #####   | #####    | 1 | 4 | Colon | 19  | 0.0 | NA   | NA   |
| TCGA-DM-A280 | #####   | #####   | #NUM!    | 1 | 4 | Colon | 8   | 1.0 | NA   | NA   |
| TCGA-AA-3994 | #####   | #####   | #####    | 1 | 4 | Colon | 27  | 0.0 | #N/A | #N/A |

|              |            |           |            |   |   |      |     |   |      |      |
|--------------|------------|-----------|------------|---|---|------|-----|---|------|------|
| TCGA-55-A493 | 9.06283904 | 8.0512539 | 0.9260222  | 2 | 4 | LUAD | 1   | 0 | NA   | NA   |
| TCGA-50-6594 | 7.29317089 | 6.8082289 | -3.0167163 | 2 | 4 | LUAD | 12  | 1 | NA   | 82   |
| TCGA-95-A4VN | 8.21661385 | 6.5723769 | 1.4882836  | 2 | 4 | LUAD | 18  | 0 | NA   | NA   |
| TCGA-67-3771 | 8.97255332 | 6.2279064 | 1.8387542  | 2 | 4 | LUAD | 20  | 0 | 928  | 195  |
| TCGA-64-1679 | 8.73502969 | 6.1559835 | 0.9314334  | 2 | 4 | LUAD | 82  | 0 | 433  | NA   |
| TCGA-05-4417 | 9.06150191 | 5.7375667 | 2.9251924  | 2 | 4 | LUAD | 15  | 0 | 249  | 85   |
| TCGA-55-8205 | 9.05199591 | 5.3970273 | 3.0565714  | 2 | 4 | LUAD | 20  | 0 | NA   | NA   |
| TCGA-38-4630 | 7.49202052 | 5.3716397 | 0.6267008  | 2 | 4 | LUAD | 35  | 1 | NA   | 28   |
| TCGA-L9-A8F4 | 8.24182932 | 5.3696235 | 1.4900309  | 2 | 4 | LUAD | 16  | 0 | NA   | NA   |
| TCGA-55-6987 | 8.75144012 | 5.2986052 | 2.8100194  | 2 | 4 | LUAD | 70  | 0 | NA   | NA   |
| TCGA-91-8499 | 8.48399973 | 5.2540218 | 0.3222628  | 2 | 4 | LUAD | 1   | 0 | NA   | NA   |
| TCGA-55-7283 | 8.361602   | 5.1719294 | 1.7259069  | 2 | 4 | LUAD | 20  | 0 | 210  | NA   |
| TCGA-49-AAR3 | 9.04283768 | 5.1473034 | 1.8481532  | 2 | 4 | LUAD | 62  | 0 | NA   | NA   |
| TCGA-MP-A4TJ | 8.74152668 | 5.0820715 | 1.3731248  | 2 | 4 | LUAD | 11  | 1 | NA   | NA   |
| TCGA-55-6971 | 8.89540278 | 4.9228358 | 2.9532485  | 2 | 4 | LUAD | 46  | 0 | 77   | NA   |
| TCGA-44-2662 | 9.03649276 | 4.7206052 | 0.9480326  | 2 | 4 | LUAD | 42  | 0 | 184  | 54   |
| TCGA-55-8302 | 8.16870797 | 4.6688039 | 2.2242286  | 2 | 4 | LUAD | 16  | 0 | NA   | NA   |
| TCGA-49-AAR4 | 8.40263811 | 4.5958897 | 1.7345427  | 2 | 4 | LUAD | 29  | 1 | NA   | NA   |
| TCGA-99-8032 | 7.74899041 | 4.3656044 | 2.4870798  | 2 | 4 | LUAD | 1   | 0 | NA   | NA   |
| TCGA-86-8074 | 8.80503837 | 4.3639259 | 2.4287534  | 2 | 4 | LUAD | 1   | 0 | NA   | NA   |
| TCGA-55-7724 | 8.76067039 | 4.2938648 | -2.4237584 | 2 | 4 | LUAD | 23  | 0 | 239  | NA   |
| TCGA-53-7813 | 8.34848894 | 4.1673395 | -2.4050693 | 2 | 4 | LUAD | 14  | 0 | 141  | NA   |
| TCGA-44-7662 | 8.63357804 | 4.1376396 | 1.8752453  | 2 | 4 | LUAD | 7   | 0 | 508  | NA   |
| TCGA-73-4658 | 8.92100554 | 4.0959345 | 3.1098302  | 2 | 4 | LUAD | 53  | 1 | 271  | 63   |
| TCGA-95-7039 | 8.70811859 | 4.0532339 | 2.2195062  | 2 | 4 | LUAD | 42  | 0 | 1116 | NA   |
| TCGA-44-3919 | 9.03817825 | 4.0288184 | 2.6301515  | 2 | 4 | LUAD | 34  | 1 | 101  | 36   |
| TCGA-38-4625 | 8.2960059  | 8.4399111 | 1.8256391  | 2 | 4 | LUAD | 98  | 0 | NA   | 78   |
| TCGA-50-5933 | 8.95126877 | 7.6435567 | 2.6699678  | 2 | 4 | LUAD | 79  | 1 | 468  | 67   |
| TCGA-NJ-A4YF | 8.19202418 | 7.4939809 | 1.9039021  | 2 | 4 | LUAD | 71  | 0 | NA   | NA   |
| TCGA-55-8094 | 9.03958067 | 6.9358097 | -5.574154  | 2 | 4 | LUAD | 18  | 0 | NA   | NA   |
| TCGA-86-8358 | 8.93831567 | 6.889568  | -4.2460532 | 2 | 4 | LUAD | 21  | 0 | NA   | NA   |
| TCGA-44-7660 | 8.91495845 | 6.6268347 | -0.67888   | 2 | 4 | LUAD | 19  | 0 | NA   | NA   |
| TCGA-49-6767 | 8.43018628 | 6.3741845 | 0.4757801  | 2 | 4 | LUAD | 22  | 0 | 404  | 50   |
| TCGA-86-6851 | 9.04532094 | 6.3230699 | -1.2267801 | 2 | 4 | LUAD | 6   | 0 | 824  | NA   |
| TCGA-55-A4DF | 8.76993504 | 6.3207679 | 0.6689723  | 2 | 4 | LUAD | 20  | 1 | NA   | NA   |
| TCGA-55-8299 | 8.73168221 | 5.8152268 | 2.9298535  | 2 | 4 | LUAD | 15  | 1 | NA   | NA   |
| TCGA-50-5931 | 7.43128004 | 5.6271904 | -5.3528421 | 2 | 4 | LUAD | 14  | 1 | 273  | 26   |
| TCGA-78-7146 | 8.421682   | 5.5233308 | #NUM!      | 2 | 4 | LUAD | 6   | 1 | NA   | NA   |
| TCGA-97-A4M2 | 8.60885    | 5.3544342 | 3.0514452  | 2 | 4 | LUAD | 20  | 0 | NA   | NA   |
| TCGA-55-7911 | 8.55149445 | 5.0958624 | 0.8678569  | 2 | 4 | LUAD | 18  | 0 | 195  | NA   |
| TCGA-44-3398 | 8.61704618 | 5.0732903 | 1.6513847  | 2 | 4 | LUAD | 38  | 0 | NA   | 25   |
| TCGA-44-7672 | 8.92664608 | 5.0499705 | 2.0693894  | 2 | 4 | LUAD | 24  | 0 | 145  | NA   |
| TCGA-44-A479 | 8.92622227 | 5.0279113 | #NUM!      | 2 | 4 | LUAD | 16  | 0 | NA   | NA   |
| TCGA-MP-A4TE | 7.86150048 | 4.9209059 | 0.9615048  | 2 | 4 | LUAD | 29  | 1 | #N/A | #N/A |
| TCGA-75-7027 | 9.03702131 | 4.8931641 | 1.5390843  | 2 | 4 | LUAD | 100 | 0 | 207  | NA   |
| TCGA-69-7765 | 8.69452947 | 4.8534932 | 2.2879214  | 2 | 4 | LUAD | 5   | 0 | 543  | NA   |
| TCGA-50-6591 | 8.90876461 | 4.828761  | 0.3078132  | 2 | 4 | LUAD | 4   | 1 | NA   | 16   |
| TCGA-49-4487 | 8.94729188 | 4.6340856 | 2.3679693  | 2 | 4 | LUAD | 28  | 1 | 342  | 76   |
| TCGA-55-8621 | 8.80070833 | 4.5242486 | 2.2575297  | 2 | 4 | LUAD | 17  | 0 | NA   | NA   |
| TCGA-05-4390 | 8.2219543  | 4.5107911 | 1.6750391  | 2 | 4 | LUAD | 37  | 0 | 498  | 68   |
| TCGA-55-8091 | 8.34630514 | 4.479508  | 2.1327578  | 2 | 4 | LUAD | 20  | 0 | NA   | NA   |
| TCGA-86-8668 | 8.71774818 | 4.4641422 | 2.5891762  | 2 | 4 | LUAD | 14  | 0 | NA   | NA   |
| TCGA-05-4384 | 8.25406266 | 4.4601783 | 2.3091121  | 2 | 4 | LUAD | 14  | 0 | 119  | 31   |
| TCGA-55-7907 | 8.78792038 | 4.4418811 | -3.2035684 | 2 | 4 | LUAD | 11  | 1 | 950  | NA   |

|              |            |           |            |   |   |      |       |     |      |      |
|--------------|------------|-----------|------------|---|---|------|-------|-----|------|------|
| TCGA-55-A490 | 8.77859401 | 4.3842667 | -4.6770566 | 2 | 4 | LUAD | 3     | 1   | #N/A | #N/A |
| TCGA-44-2657 | 8.72917754 | 4.3555365 | 2.2851477  | 2 | 4 | LUAD | 44    | 0   | 342  | 38   |
| TCGA-55-8511 | 8.51981471 | 4.3334066 | 1.8523904  | 2 | 4 | LUAD | 18    | 0   | NA   | NA   |
| TCGA-MP-A4T4 | 8.7298171  | 4.3208067 | #NUM!      | 2 | 4 | LUAD | 86    | 1   | NA   | NA   |
| TCGA-MP-A4SV | 8.06875394 | 4.3068564 | 1.146779   | 2 | 4 | LUAD | 86    | 1   | NA   | NA   |
| TCGA-64-5781 | 8.88885936 | 4.3061448 | 0.7382144  | 2 | 4 | LUAD | 51    | 0   | 936  | 144  |
| TCGA-86-8672 | 8.66051948 | 4.08553   | 0.7585079  | 2 | 4 | LUAD | 1     | 1   | NA   | NA   |
| TCGA-55-7573 | 8.42212403 | 4.0182977 | 2.5421119  | 2 | 4 | LUAD | 16    | 0   | 53   | NA   |
| TCGA-NJ-A4YQ | 8.90840982 | 4.0150479 | -4.7361964 | 2 | 4 | LUAD | 47    | 0   | NA   | NA   |
| TCGA-44-7669 | 8.07541208 | 4.003318  | 0.1726283  | 2 | 4 | LUAD | 19    | 1   | NA   | NA   |
| TCGA-62-A472 | 7.88811996 | 3.9856726 | 0.9735378  | 2 | 4 | LUAD | 30    | 0   | NA   | NA   |
| TCGA-62-8402 | 8.65844733 | 3.9822306 | -0.0226248 | 2 | 4 | LUAD | 49    | 1   | NA   | NA   |
| TCGA-55-7995 | 8.87402701 | 6.0880129 | -1.1198866 | 2 | 4 | LUAD | 29    | 0   | NA   | NA   |
| TCGA-64-5779 | 8.27077182 | 6.0022358 | 1.3799481  | 2 | 4 | LUAD | 28    | 0   | NA   | 49   |
| TCGA-53-A4EZ | 8.76783334 | 5.79368   | #NUM!      | 2 | 4 | LUAD | 35    | 0   | NA   | NA   |
| TCGA-49-AAQV | 7.85735385 | 5.7160638 | 0.8521347  | 2 | 4 | LUAD | 22    | 1   | NA   | NA   |
| TCGA-55-6543 | 8.40417619 | 5.3864582 | 3.12005    | 2 | 4 | LUAD | 14    | 0   | 23   | 8    |
| TCGA-44-3396 | 9.01235787 | 5.2390264 | 2.3244189  | 2 | 4 | LUAD | 37    | 0   | 155  | 32   |
| TCGA-55-8510 | 8.81061922 | 5.1133767 | 2.2749057  | 2 | 4 | LUAD | 18    | 0   | NA   | NA   |
| TCGA-73-4666 | 8.4400936  | 4.8050019 | 0.8819152  | 2 | 4 | LUAD | 26    | 0   | NA   | 64   |
| TCGA-44-A47G | 8.93217984 | 4.7593348 | 2.7060907  | 2 | 4 | LUAD | 12    | 0   | NA   | NA   |
| TCGA-MN-A4N4 | 8.4820162  | 4.6341233 | 2.8200666  | 2 | 4 | LUAD | 39    | 0   | NA   | NA   |
| TCGA-05-4430 | 8.80912513 | 4.5637408 | 1.4752821  | 2 | 4 | LUAD | 25    | 0   | 269  | 35   |
| TCGA-55-7994 | 8.47630873 | 4.3712898 | #NUM!      | 2 | 4 | LUAD | 20    | 0   | NA   | NA   |
| TCGA-67-3772 | 8.27682673 | 4.3415261 | 1.606447   | 2 | 4 | LUAD | 19    | 0   | 81   | 17   |
| TCGA-73-4668 | 8.5143203  | 4.2717006 | 1.4407875  | 2 | 4 | LUAD | 15    | 0   | NA   | 86   |
| TCGA-91-6849 | 8.7008001  | 4.1454835 | 3.0124632  | 2 | 4 | LUAD | 1     | 0   | 92   | NA   |
| TCGA-93-7348 | 8.79902224 | 4.1104543 | 2.4377471  | 2 | 4 | LUAD | 17    | 0   | 100  | NA   |
| TCGA-J2-8194 | 8.5184116  | 4.0931029 | 0.9695723  | 2 | 4 | LUAD | 24    | 0   | NA   | NA   |
| TCGA-55-7910 | 7.90515417 | 4.0428535 | -3.0697547 | 2 | 4 | LUAD | 34    | 0   | NA   | NA   |
| TCGA-EA-A3HR | #####      | #####     | #####      | 2 | 4 | CESC | 30.88 | 0.0 | 62   | 7    |
| TCGA-HG-A2PA | #####      | #####     | #####      | 2 | 4 | CESC | 25.39 | 1.0 | 67   | 4    |
| TCGA-EA-A4BA | #####      | #####     | #####      | 2 | 4 | CESC | 24.80 | 0.0 | 43   | 9    |
| TCGA-C5-A1MK | #####      | #####     | #####      | 2 | 4 | CESC | 2.43  | 1.0 | 260  | 57   |
| TCGA-EA-A5ZF | #####      | #####     | #####      | 2 | 4 | CESC | 27.20 | 0.0 | 58   | 13   |
| TCGA-EK-A2RJ | #####      | #####     | #####      | 2 | 4 | CESC | 1.74  | 0.0 | 302  | 73   |
| TCGA-ZX-AA5X | #####      | #####     | #####      | 2 | 4 | CESC | 3.91  | 0.0 | NA   | NA   |
| TCGA-C5-A7UI | #####      | #####     | #####      | 2 | 4 | CESC | 94.88 | 1.0 | NA   | NA   |
| TCGA-EK-A2RN | #####      | #####     | #####      | 2 | 4 | CESC | 2.33  | 0.0 | 130  | 19   |
| TCGA-VS-A94Y | #####      | #####     | #####      | 2 | 4 | CESC | 4.73  | 1.0 | NA   | NA   |
| TCGA-BI-A20A | #####      | #####     | #####      | 2 | 4 | CESC | 23.65 | 0.0 | 56   | 10   |
| TCGA-C5-A1MH | #####      | #####     | #####      | 2 | 4 | CESC | 38.96 | 1.0 | 236  | 130  |
| TCGA-VS-A9U6 | #####      | #####     | #####      | 2 | 4 | CESC | 43.36 | 0.0 | #N/A | #N/A |
| TCGA-DG-A2KL | #####      | #####     | #####      | 2 | 4 | CESC | 44.91 | 0.0 | 141  | 22   |
| TCGA-EA-A3HU | #####      | #####     | #####      | 2 | 4 | CESC | 33.28 | 0.0 | 904  | 174  |
| TCGA-ZJ-AB0H | #####      | #####     | #####      | 2 | 4 | CESC | 0.00  | 0.0 | NA   | NA   |
| TCGA-VS-A8Q8 | #####      | #####     | #####      | 2 | 4 | CESC | 32.13 | 1.0 | NA   | NA   |
| TCGA-HM-A3JJ | #####      | #####     | #####      | 2 | 4 | CESC | 21.65 | 1.0 | 8    | 0    |
| TCGA-DR-A0ZM | #####      | #####     | #####      | 2 | 4 | CESC | 58.84 | 0.0 | 1056 | 353  |
| TCGA-MA-AA3V | #####      | #####     | #####      | 2 | 4 | CESC | 22.50 | 0.0 | NA   | NA   |
| TCGA-HM-A3JK | #####      | #####     | #####      | 2 | 4 | CESC | 20.76 | 0.0 | 44   | 3    |
| TCGA-VS-A8EL | #####      | #####     | #####      | 2 | 4 | CESC | 65.44 | 0.0 | NA   | NA   |
| TCGA-C5-A7UH | #####      | #####     | #####      | 2 | 4 | CESC | ####  | 0.0 | 207  | 51   |
| TCGA-C5-A1BL | #####      | #####     | #####      | 2 | 4 | CESC | ####  | 0.0 | 151  | 58   |

|              |       |       |       |   |   |      |       |     |      |     |
|--------------|-------|-------|-------|---|---|------|-------|-----|------|-----|
| TCGA-MU-A51Y | ##### | ##### | ##### | 2 | 4 | CESC | 28.06 | 0.0 | 140  | 37  |
| TCGA-VS-A8QA | ##### | ##### | ##### | 2 | 4 | CESC | 36.10 | 0.0 | NA   | NA  |
| TCGA-UC-A7PC | ##### | ##### | ##### | 2 | 4 | CESC | 12.16 | 1.0 | NA   | NA  |
| TCGA-JW-A5VH | ##### | ##### | ##### | 2 | 4 | CESC | 3.29  | 1.0 | 65   | 13  |
| TCGA-XS-A8TJ | ##### | ##### | ##### | 2 | 4 | CESC | 29.24 | 0.0 | NA   | NA  |
| TCGA-EK-A2RK | ##### | ##### | ##### | 2 | 4 | CESC | 0.43  | 0.0 | 206  | 27  |
| TCGA-DS-A1OB | ##### | ##### | ##### | 2 | 4 | CESC | 28.29 | 1.0 | NA   | NA  |
| TCGA-C5-A1BF | ##### | ##### | ##### | 2 | 4 | CESC | 18.73 | 1.0 | 161  | 13  |
| TCGA-EA-A556 | ##### | ##### | ##### | 2 | 4 | CESC | 14.88 | 0.0 | 24   | 8   |
| TCGA-C5-A2LX | ##### | ##### | ##### | 2 | 4 | CESC | 82.98 | 0.0 | 157  | 18  |
| TCGA-C5-A1BM | ##### | ##### | ##### | 2 | 4 | CESC | 82.79 | 1.0 | 115  | 19  |
| TCGA-EK-A2R9 | ##### | ##### | ##### | 2 | 4 | CESC | 0.13  | 0.0 | 59   | 5   |
| TCGA-FU-A3YQ | ##### | ##### | ##### | 2 | 4 | CESC | 28.29 | 0.0 | 59   | 19  |
| TCGA-VS-A9U7 | ##### | ##### | ##### | 2 | 4 | CESC | 48.36 | 0.0 | NA   | NA  |
| TCGA-C5-A1M5 | ##### | ##### | ##### | 2 | 4 | CESC | 67.41 | 1.0 | 38   | 9   |
| TCGA-EA-A3QE | ##### | ##### | ##### | 2 | 4 | CESC | 25.00 | 0.0 | 62   | 16  |
| TCGA-DS-A0VK | ##### | ##### | ##### | 2 | 4 | CESC | 36.73 | 1.0 | 95   | 33  |
| TCGA-VS-A9V0 | ##### | ##### | ##### | 2 | 4 | CESC | 18.82 | 0.0 | NA   | NA  |
| TCGA-JW-A852 | ##### | ##### | ##### | 2 | 4 | CESC | 8.28  | 1.0 | 85   | 22  |
| TCGA-EA-A43B | ##### | ##### | ##### | 2 | 4 | CESC | 25.99 | 0.0 | 102  | 22  |
| TCGA-VS-A958 | ##### | ##### | ##### | 2 | 4 | CESC | 50.10 | 0.0 | NA   | NA  |
| TCGA-ZJ-AB0I | ##### | ##### | ##### | 2 | 4 | CESC | 0.00  | 0.0 | NA   | NA  |
| TCGA-VS-A9UV | ##### | ##### | ##### | 2 | 4 | CESC | 3.42  | 1.0 | NA   | NA  |
| TCGA-VS-A9UB | ##### | ##### | ##### | 2 | 4 | CESC | 29.93 | 0.0 | NA   | NA  |
| TCGA-R2-A69V | ##### | ##### | ##### | 2 | 4 | CESC | 19.58 | 0.0 | 96   | 16  |
| TCGA-VS-A9UJ | ##### | ##### | ##### | 2 | 4 | CESC | 1.71  | 1.0 | NA   | NA  |
| TCGA-VS-A9UH | ##### | ##### | ##### | 2 | 4 | CESC | 46.88 | 0.0 | NA   | NA  |
| TCGA-C5-A2LY | ##### | ##### | ##### | 2 | 4 | CESC | 78.29 | 0.0 | 3    | 1   |
| TCGA-VS-A959 | ##### | ##### | ##### | 2 | 4 | CESC | 51.28 | 0.0 | NA   | NA  |
| TCGA-VS-A9UT | ##### | ##### | ##### | 2 | 4 | CESC | 15.83 | 0.0 | NA   | NA  |
| TCGA-MA-AA3X | ##### | ##### | ##### | 2 | 4 | CESC | 20.27 | 0.0 | NA   | NA  |
| TCGA-FU-A3HZ | ##### | ##### | ##### | 2 | 4 | CESC | 36.24 | 0.0 | 1832 | 310 |
| TCGA-RA-A741 | ##### | ##### | ##### | 2 | 4 | CESC | 14.59 | 0.0 | 84   | 15  |
| TCGA-Q1-A6DT | ##### | ##### | ##### | 2 | 4 | CESC | 9.03  | 1.0 | 159  | 30  |
| TCGA-C5-A8YR | ##### | ##### | ##### | 2 | 4 | CESC | 27.50 | 1.0 | NA   | NA  |
| TCGA-JX-A3PZ | ##### | ##### | ##### | 2 | 4 | CESC | 21.09 | 1.0 | 45   | 8   |
| TCGA-C5-A7CH | ##### | ##### | ##### | 2 | 4 | CESC | ####  | 0.0 | 54   | 11  |
| TCGA-C5-A1ML | ##### | ##### | ##### | 2 | 4 | CESC | 20.89 | 1.0 | 168  | 13  |
| TCGA-VS-A8EJ | ##### | ##### | ##### | 2 | 4 | CESC | 19.94 | 1.0 | NA   | NA  |
| TCGA-VS-A94X | ##### | ##### | ##### | 2 | 4 | CESC | 16.62 | 1.0 | NA   | NA  |
| TCGA-C5-A8YQ | ##### | ##### | ##### | 2 | 4 | CESC | 23.49 | 1.0 | NA   | NA  |
| TCGA-VS-A8EB | ##### | ##### | ##### | 2 | 4 | CESC | 10.02 | 1.0 | NA   | NA  |
| TCGA-JX-A5QV | ##### | ##### | ##### | 2 | 4 | CESC | 20.89 | 0.0 | 39   | 5   |
| TCGA-FU-A5XV | ##### | ##### | ##### | 2 | 4 | CESC | 10.55 | 0.0 | 82   | 10  |
| TCGA-MA-AA3Y | ##### | ##### | ##### | 2 | 4 | CESC | 17.81 | 0.0 | NA   | NA  |
| TCGA-HM-A4S6 | ##### | ##### | ##### | 2 | 4 | CESC | 14.91 | 0.0 | 41   | 9   |
| TCGA-DS-A1OC | ##### | ##### | ##### | 2 | 4 | CESC | 12.35 | 0.0 | NA   | 83  |
| TCGA-EA-A5ZE | ##### | ##### | ##### | 2 | 4 | CESC | 27.23 | 0.0 | 44   | 7   |
| TCGA-DS-A7WF | ##### | ##### | #NUM! | 2 | 4 | CESC | 16.16 | 1.0 | 42   | 10  |
| TCGA-DG-A2KK | ##### | ##### | #NUM! | 2 | 4 | CESC | 82.00 | 0.0 | 248  | 35  |
| TCGA-DS-A0VM | ##### | ##### | #NUM! | 2 | 4 | CESC | ####  | 0.0 | 233  | 63  |
| TCGA-DS-A3LQ | ##### | ##### | #NUM! | 2 | 4 | CESC | 22.96 | 0.0 | 24   | 8   |
| TCGA-DS-A1OA | ##### | ##### | #NUM! | 2 | 4 | CESC | 28.88 | 1.0 | 76   | NA  |
| TCGA-MY-A913 | ##### | ##### | #NUM! | 2 | 4 | CESC | 17.21 | 0.0 | NA   | NA  |

|              |         |         |          |   |   |      |       |     |     |    |
|--------------|---------|---------|----------|---|---|------|-------|-----|-----|----|
| TCGA-BI-A0VS | #####   | #####   | #NUM!    | 2 | 4 | CESC | 57.00 | 0.0 | 96  | 20 |
| TCGA-2W-A8YY | #####   | #####   | #NUM!    | 2 | 4 | CESC | 17.51 | 0.0 | NA  | NA |
| TCGA-EA-A1QS | #####   | #####   | #NUM!    | 2 | 4 | CESC | 39.52 | 0.0 | 36  | 6  |
| TCGA-EX-A1H5 | #####   | #####   | #NUM!    | 2 | 4 | CESC | 20.34 | 0.0 | 79  | 10 |
| TCGA-C5-A7CL | #####   | #####   | #NUM!    | 2 | 4 | CESC | 15.47 | 1.0 | 134 | 22 |
| TCGA-EA-A439 | #####   | #####   | #NUM!    | 2 | 4 | CESC | 31.70 | 0.0 | 94  | 24 |
| TCGA-EK-A3GJ | #####   | #####   | #NUM!    | 2 | 4 | CESC | 0.10  | 0.0 | 198 | 39 |
| TCGA-C5-A1BK | #####   | #####   | #NUM!    | 2 | 4 | CESC | ####  | 0.0 | 138 | 43 |
| TCGA-C5-A8XH | #####   | #####   | #NUM!    | 2 | 4 | CESC | 45.80 | 1.0 | NA  | NA |
| TCGA-EA-A3HQ | #####   | #####   | #NUM!    | 2 | 4 | CESC | 37.32 | 0.0 | 73  | 17 |
| TCGA-Q1-A6DW | #####   | #####   | #NUM!    | 2 | 4 | CESC | 17.54 | 0.0 | 115 | 30 |
| TCGA-DS-A1O9 | #####   | #####   | #NUM!    | 2 | 4 | CESC | 8.74  | 1.0 | NA  | NA |
| TCGA-FU-A3NI | #####   | #####   | #NUM!    | 2 | 4 | CESC | 20.96 | 1.0 | 83  | 17 |
| TCGA-BI-A0VR | #####   | #####   | #NUM!    | 2 | 4 | CESC | 49.44 | 0.0 | 74  | 26 |
| TCGA-C5-A2LT | #####   | #####   | #NUM!    | 2 | 4 | CESC | 73.13 | 0.0 | 3   | 2  |
| TCGA-EK-A2H0 | #####   | #####   | #NUM!    | 2 | 4 | CESC | 60.68 | 0.0 | 157 | 26 |
| TCGA-EA-A3HT | #####   | #####   | #NUM!    | 2 | 4 | CESC | 31.34 | 0.0 | 85  | 20 |
| TCGA-DS-A0VN | #####   | #####   | #NUM!    | 2 | 4 | CESC | ####  | 0.0 | 115 | 33 |
| TCGA-VS-A8EK | #####   | #####   | #NUM!    | 2 | 4 | CESC | 27.23 | 1.0 | NA  | NA |
| TCGA-DG-A2KN | #####   | #####   | #NUM!    | 2 | 4 | CESC | 63.93 | 0.0 | 109 | 23 |
| TCGA-C5-A905 | #####   | #####   | #NUM!    | 2 | 4 | CESC | ####  | 0.0 | NA  | NA |
| TCGA-C5-A902 | #####   | #####   | #NUM!    | 2 | 4 | CESC | 4.89  | 0.0 | NA  | NA |
| TCGA-15-1444 | 6.8501  | 0.8501  | 0.4351   | 2 | 4 | GBM  | 50    | 1.0 | 21  | 7  |
| TCGA-19-4065 | 7.0318  | 5.2065  | 0.3735   | 2 | 4 | GBM  | 7     | 0.0 | 27  | NA |
| TCGA-19-2624 | 6.9213  | 2.8102  | 0.3078   | 2 | 4 | GBM  | 0     | 1.0 | 11  | 15 |
| TCGA-06-0744 | 6.6263  | 1.4332  | 0.1113   | 2 | 4 | GBM  | 47    | 1.0 | 47  | 16 |
| TCGA-26-1442 | 5.3725  | 2.0687  | 0.0687   | 2 | 4 | GBM  | 31    | 0.0 | 27  | 14 |
| TCGA-28-5204 | 7.0860  | 0.5785  | -0.0065  | 2 | 4 | GBM  | 15    | 1.0 | 34  | 8  |
| TCGA-12-3653 | 6.7123  | 0.5364  | -0.4635  | 2 | 4 | GBM  | 15    | 1.0 | 25  | 3  |
| TCGA-06-5856 | 6.6662  | 0.5301  | -1.0550  | 2 | 4 | GBM  | 4     | 1.0 | 36  | 13 |
| TCGA-06-2563 | 6.5939  | 1.2387  | -1.0831  | 2 | 4 | GBM  | 31    | 0.0 | 54  | 15 |
| TCGA-28-2514 | 6.8818  | 5.0718  | -1.1181  | 2 | 4 | GBM  | 5     | 0.0 | 11  | 4  |
| TCGA-06-5858 | 6.9217  | 1.4514  | -1.1335  | 2 | 4 | GBM  | 6     | 0.0 | 114 | 51 |
| TCGA-06-5415 | 7.0144  | 2.1910  | -1.8089  | 2 | 4 | GBM  | 9     | 0.0 | 37  | 10 |
| TCGA-12-0616 | 6.7056  | 3.4635  | #NUM!    | 2 | 4 | GBM  | 15    | 1.0 | 20  | 11 |
| TCGA-19-5960 | 6.8175  | 2.7819  | #NUM!    | 2 | 4 | GBM  | 15    | 1.0 | 31  | 11 |
| TCGA-32-5222 | 6.5393  | 1.5929  | #NUM!    | 2 | 4 | GBM  | 19    | 1.0 | 48  | 16 |
| TCGA-12-5295 | 5.8079  | 0.9499  | #NUM!    | 2 | 4 | GBM  | 15    | 1.0 | 54  | 13 |
| TCGA-12-3650 | 6.5423  | 0.7759  | #NUM!    | 2 | 4 | GBM  | 11    | 1.0 | 39  | 10 |
| TCGA-A1-A0SK | 7.77153 | 8.87836 | -0.18439 | 2 | 4 | BRCA | 31.8  | 1   | 103 | 11 |
| TCGA-BH-A204 | 6.94079 | 6.45595 | #NUM!    | 2 | 4 | BRCA | 83.2  | 1   | 33  | 9  |
| TCGA-A7-A13E | 7.48484 | 5.77908 | 0.25112  | 2 | 4 | BRCA | 20.2  | 1   | 222 | NA |
| TCGA-B6-A0RQ | 8.63421 | 4.86155 | 2.22184  | 2 | 4 | BRCA | 140.2 | 1   | 12  | 1  |
| TCGA-BH-A1EV | 8.26205 | 4.79251 | 1.04324  | 2 | 4 | BRCA | 12.0  | 1   | 67  | 16 |
| TCGA-B6-A0X4 | 8.06017 | 4.66531 | 1.64073  | 2 | 4 | BRCA | 28.2  | 1   | 16  | 2  |
| TCGA-AR-A2LK | 7.87933 | 4.49380 | 1.23734  | 2 | 4 | BRCA | 54.2  | 1   | 29  | NA |
| TCGA-A2-A3XX | 8.51383 | 4.38327 | 1.43124  | 2 | 4 | BRCA | 47.3  | 1   | 29  | NA |
| TCGA-A2-A3XS | 8.15937 | 4.34062 | 1.24988  | 2 | 4 | BRCA | 33.9  | 1   | 21  | NA |
| TCGA-BH-A18L | 6.91257 | 4.28047 | -0.05364 | 2 | 4 | BRCA | 26.6  | 1   | 30  | 6  |
| TCGA-B6-A0IP | 8.26668 | 4.24658 | 1.51094  | 2 | 4 | BRCA | 129.0 | 1   | 21  | NA |
| TCGA-E2-A14Z | 8.56143 | 4.21421 | 0.16101  | 2 | 4 | BRCA | 18.5  | 1   | 43  | 5  |
| TCGA-A2-A0CS | 7.97776 | 4.06410 | 1.52750  | 2 | 4 | BRCA | 77.1  | 1   | 26  | 7  |
| TCGA-B6-A0X7 | 7.98632 | 3.94291 | 2.27222  | 2 | 4 | BRCA | 58.5  | 1   | 13  | NA |
| TCGA-UU-A93S | 8.58402 | 3.94146 | 2.19114  | 2 | 4 | BRCA | 3.8   | 1   | NA  | NA |

|              |         |         |          |   |   |      |       |   |     |    |
|--------------|---------|---------|----------|---|---|------|-------|---|-----|----|
| TCGA-AR-A0TZ | 7.82336 | 3.67814 | 0.95345  | 2 | 4 | BRCA | 107.2 | 1 | NA  | 5  |
| TCGA-A2-A0YT | 7.23880 | 3.61912 | 1.27197  | 2 | 4 | BRCA | 23.8  | 1 | 42  | NA |
| TCGA-AO-A03O | 8.19560 | 3.55170 | 1.98281  | 2 | 4 | BRCA | 81.6  | 1 | 55  | 19 |
| TCGA-BH-A0EA | 8.05145 | 3.51861 | 2.20125  | 2 | 4 | BRCA | 32.6  | 1 | 16  | 5  |
| TCGA-E2-A158 | 7.99466 | 8.75899 | 0.76893  | 2 | 4 | BRCA | 14.8  | 0 | 81  | 18 |
| TCGA-GM-A2DE | 7.32039 | 6.87213 | -2.66493 | 2 | 4 | BRCA | 79.0  | 0 | 82  | NA |
| TCGA-BH-A0HW | 7.45105 | 6.68219 | #NUM!    | 2 | 4 | BRCA | 51.3  | 0 | 31  | 7  |
| TCGA-A2-A0CY | 7.98346 | 6.62333 | -3.37243 | 2 | 4 | BRCA | 55.0  | 0 | NA  | NA |
| TCGA-E2-A15T | 6.90875 | 6.09023 | -0.13293 | 2 | 4 | BRCA | 51.4  | 0 | 32  | 5  |
| TCGA-A8-A09D | 8.64494 | 5.77562 | 1.69885  | 2 | 4 | BRCA | 50.0  | 0 | 33  | 7  |
| TCGA-C8-A130 | 8.32290 | 5.76535 | 0.86210  | 2 | 4 | BRCA | 12.2  | 0 | 24  | 6  |
| TCGA-A8-A081 | 7.57166 | 5.75765 | -0.76550 | 2 | 4 | BRCA | 0.0   | 0 | 67  | 15 |
| TCGA-OL-A5RZ | 7.51166 | 5.70643 | 1.56310  | 2 | 4 | BRCA | 22.3  | 0 | 22  | NA |
| TCGA-E2-A14X | 8.59183 | 5.64612 | 0.24574  | 2 | 4 | BRCA | 31.9  | 0 | 18  | 4  |
| TCGA-AR-A1AM | 8.29006 | 5.62163 | 2.07031  | 2 | 4 | BRCA | 98.3  | 0 | 20  | NA |
| TCGA-E9-A22B | 8.47599 | 5.59771 | 0.75252  | 2 | 4 | BRCA | 38.3  | 0 | 40  | 7  |
| TCGA-E9-A1N9 | 8.68571 | 5.44699 | -4.69227 | 2 | 4 | BRCA | 36.2  | 0 | 43  | 5  |
| TCGA-BH-A0GZ | 8.35020 | 5.43731 | 1.30592  | 2 | 4 | BRCA | 10.8  | 0 | 23  | 8  |
| TCGA-B6-A402 | 8.57792 | 5.37499 | -0.15505 | 2 | 4 | BRCA | 74.9  | 0 | 40  | NA |
| TCGA-AO-A0J2 | 7.62165 | 5.34104 | #NUM!    | 2 | 4 | BRCA | 32.8  | 0 | 46  | 4  |
| TCGA-AN-A04D | 7.97890 | 5.30915 | -0.24392 | 2 | 4 | BRCA | 1.7   | 0 | 75  | 7  |
| TCGA-OL-A5RW | 7.27326 | 5.27849 | 0.35533  | 2 | 4 | BRCA | 36.3  | 0 | 125 | NA |
| TCGA-A8-A07C | 8.30400 | 5.18219 | #NUM!    | 2 | 4 | BRCA | 34.0  | 0 | 114 | NA |
| TCGA-E2-A1LI | 8.09278 | 5.07376 | -0.52548 | 2 | 4 | BRCA | 102.5 | 0 | 10  | 5  |
| TCGA-EW-A1P4 | 8.64415 | 5.01988 | 1.18530  | 2 | 4 | BRCA | 29.8  | 0 | 48  | 8  |
| TCGA-AQ-A54N | 7.57086 | 4.91962 | -2.84032 | 2 | 4 | BRCA | 2.6   | 0 | 63  | NA |
| TCGA-A2-A4S0 | 8.14547 | 4.86666 | 1.60757  | 2 | 4 | BRCA | 23.2  | 0 | 6   | NA |
| TCGA-EW-A1P6 | 8.19201 | 4.76781 | 1.57966  | 2 | 4 | BRCA | 18.5  | 0 | 18  | 7  |
| TCGA-D8-A1XL | 8.56629 | 4.76745 | -0.24753 | 2 | 4 | BRCA | 19.9  | 0 | 80  | 13 |
| TCGA-EW-A6SA | 7.58799 | 4.74675 | -0.14620 | 2 | 4 | BRCA | 16.8  | 0 | NA  | NA |
| TCGA-A2-A04Y | 8.28347 | 4.72259 | 1.08347  | 2 | 4 | BRCA | 36.1  | 0 | 45  | 5  |
| TCGA-AR-A0U0 | 8.55679 | 4.66541 | 1.73876  | 2 | 4 | BRCA | 65.3  | 0 | 42  | 4  |
| TCGA-C8-A12L | 8.28604 | 4.61994 | 0.20484  | 2 | 4 | BRCA | 11.9  | 0 | 59  | 11 |
| TCGA-D8-A27P | 8.28714 | 4.61915 | -7.59005 | 2 | 4 | BRCA | 1.6   | 0 | 16  | 4  |
| TCGA-A7-A0CE | 8.09618 | 4.61739 | #NUM!    | 2 | 4 | BRCA | 35.3  | 0 | 173 | 18 |
| TCGA-AO-A0JL | 8.26249 | 4.60353 | 1.57369  | 2 | 4 | BRCA | 55.3  | 0 | 48  | NA |
| TCGA-A8-A06Q | 7.06739 | 4.59198 | #NUM!    | 2 | 4 | BRCA | 1.0   | 0 | 180 | 34 |
| TCGA-A2-A0EQ | 8.42817 | 4.56489 | 1.12021  | 2 | 4 | BRCA | 79.7  | 0 | 67  | 12 |
| TCGA-A2-A0D1 | 7.35371 | 4.52055 | -4.10880 | 2 | 4 | BRCA | 34.5  | 0 | 56  | 5  |
| TCGA-C8-A27A | 7.28464 | 4.49312 | -0.82526 | 2 | 4 | BRCA | 24.5  | 0 | 18  | 4  |
| TCGA-C8-A26Y | 6.85232 | 4.45260 | #NUM!    | 2 | 4 | BRCA | 12.9  | 0 | 521 | NA |
| TCGA-A7-A3RF | 7.69307 | 4.37809 | -0.01840 | 2 | 4 | BRCA | 13.4  | 0 | 47  | NA |
| TCGA-E9-A1N3 | 8.18563 | 4.37581 | #NUM!    | 2 | 4 | BRCA | 34.8  | 0 | 22  | 3  |
| TCGA-BH-A0DZ | 8.49125 | 4.35193 | -2.04305 | 2 | 4 | BRCA | 16.3  | 0 | 354 | 34 |
| TCGA-E2-A152 | 8.33935 | 4.34378 | 0.22043  | 2 | 4 | BRCA | 69.9  | 0 | 95  | 17 |
| TCGA-BH-A0DP | 8.27603 | 4.30096 | 1.72615  | 2 | 4 | BRCA | 15.6  | 0 | 61  | 5  |
| TCGA-AO-A0J9 | 8.39662 | 4.29329 | -0.12894 | 2 | 4 | BRCA | 53.0  | 0 | 75  | 19 |
| TCGA-E2-A1IL | 8.50728 | 4.23559 | 2.24488  | 2 | 4 | BRCA | 3.9   | 0 | 17  | 4  |
| TCGA-E2-A573 | 7.76479 | 4.21356 | 2.04579  | 2 | 4 | BRCA | 34.9  | 0 | 42  | NA |
| TCGA-D8-A27L | 8.37580 | 4.20614 | 0.22085  | 2 | 4 | BRCA | 16.4  | 0 | 26  | 8  |
| TCGA-E2-A15F | 8.09053 | 4.18927 | -6.00139 | 2 | 4 | BRCA | 21.6  | 0 | 19  | 6  |
| TCGA-BH-A0HF | 8.12541 | 4.14693 | 1.73892  | 2 | 4 | BRCA | 13.6  | 0 | 327 | 56 |
| TCGA-A8-A08A | 7.75600 | 4.12923 | 0.05342  | 2 | 4 | BRCA | 1.0   | 0 | 27  | NA |
| TCGA-B6-A0RO | 8.50414 | 4.12712 | -0.05523 | 2 | 4 | BRCA | 161.9 | 0 | 54  | 7  |



|              |         |         |          |   |   |      |       |   |      |      |
|--------------|---------|---------|----------|---|---|------|-------|---|------|------|
| TCGA-A7-A4SA | 8.67173 | 4.08781 | 1.99433  | 2 | 4 | BRCA | 14.9  | 0 | 108  | NA   |
| TCGA-AC-A23C | 8.45659 | 4.08647 | 0.41254  | 2 | 4 | BRCA | 19.2  | 0 | 78   | 15   |
| TCGA-BH-A0BZ | 8.55680 | 4.07984 | #NUM!    | 2 | 4 | BRCA | 74.1  | 0 | 177  | 26   |
| TCGA-A2-A0SU | 8.21046 | 4.07010 | 0.32840  | 2 | 4 | BRCA | 54.6  | 0 | 18   | 10   |
| TCGA-AR-A24H | 8.46864 | 4.05123 | #NUM!    | 2 | 4 | BRCA | 160.8 | 0 | 103  | 28   |
| TCGA-C8-A12Y | 8.09434 | 4.03307 | 2.37207  | 2 | 4 | BRCA | 48.5  | 0 | 21   | 5    |
| TCGA-A8-A0A6 | 8.54331 | 4.02682 | 2.45197  | 2 | 4 | BRCA | 21.0  | 0 | 2125 | NA   |
| TCGA-A2-A0D0 | 7.33182 | 4.02180 | -4.26340 | 2 | 4 | BRCA | 67.3  | 0 | 49   | 17   |
| TCGA-A8-A0A4 | 7.46824 | 3.98437 | 0.98225  | 2 | 4 | BRCA | 13.0  | 0 | 27   | 5    |
| TCGA-BH-A0DL | 8.59147 | 3.97091 | #NUM!    | 2 | 4 | BRCA | 78.2  | 0 | 68   | 10   |
| TCGA-E2-A15P | 8.63648 | 3.95550 | 2.22457  | 2 | 4 | BRCA | 19.6  | 0 | 40   | 10   |
| TCGA-A2-A4S3 | 7.91147 | 3.94732 | 0.59557  | 2 | 4 | BRCA | 21.9  | 0 | 59   | NA   |
| TCGA-D8-A146 | 8.25494 | 3.93995 | #NUM!    | 2 | 4 | BRCA | 21.1  | 0 | 27   | NA   |
| TCGA-A2-A25D | 8.38546 | 3.93938 | -7.68483 | 2 | 4 | BRCA | 18.1  | 0 | 39   | 6    |
| TCGA-D8-A27E | 8.16314 | 3.92673 | 0.71967  | 2 | 4 | BRCA | 17.4  | 0 | 8    | 2    |
| TCGA-LL-A740 | 8.32633 | 3.90397 | 1.80141  | 2 | 4 | BRCA | 14.5  | 0 | NA   | NA   |
| TCGA-A7-A6VX | 8.40349 | 3.90096 | 1.57858  | 2 | 4 | BRCA | 10.4  | 0 | NA   | NA   |
| TCGA-BH-A0HN | 6.86271 | 3.89795 | -3.77497 | 2 | 4 | BRCA | 17.0  | 0 | 20   | 0    |
| TCGA-A7-A0DC | 7.44277 | 3.84146 | 0.92567  | 2 | 4 | BRCA | 29.8  | 0 | #N/A | #N/A |
| TCGA-BH-A0HU | 7.45783 | 3.84074 | 2.25405  | 2 | 4 | BRCA | 12.9  | 0 | 29   | 6    |
| TCGA-AR-A0TV | 7.53336 | 3.78596 | 1.56197  | 2 | 4 | BRCA | 75.2  | 0 | NA   | 7    |
| TCGA-E2-A570 | 8.27996 | 3.77399 | 2.51302  | 2 | 4 | BRCA | 30.6  | 0 | 20   | NA   |
| TCGA-D8-A1JC | 8.01768 | 3.75406 | 2.42533  | 2 | 4 | BRCA | 15.8  | 0 | 60   | 4    |
| TCGA-AO-A1KR | 8.56122 | 3.74444 | 0.88355  | 2 | 4 | BRCA | 82.6  | 0 | 47   | 13   |
| TCGA-EW-A2FV | 8.17093 | 3.74367 | #NUM!    | 2 | 4 | BRCA | 25.9  | 0 | 18   | NA   |
| TCGA-E9-A227 | 8.67629 | 3.72526 | #NUM!    | 2 | 4 | BRCA | 32.0  | 0 | 12   | 2    |
| TCGA-D8-A1JP | 8.24536 | 3.72478 | 1.29377  | 2 | 4 | BRCA | 21.0  | 0 | 85   | 25   |
| TCGA-D8-A1JT | 7.73002 | 3.72280 | 1.49389  | 2 | 4 | BRCA | 13.3  | 0 | 25   | 7    |
| TCGA-C8-A12T | 8.32676 | 3.69920 | -4.02421 | 2 | 4 | BRCA | 0.0   | 0 | 122  | 39   |
| TCGA-A2-A0T4 | 8.41146 | 3.68279 | 1.96293  | 2 | 4 | BRCA | 20.5  | 0 | 27   | 8    |
| TCGA-E9-A1RA | 8.17132 | 3.66755 | 0.25889  | 2 | 4 | BRCA | 45.0  | 0 | 13   | 5    |
| TCGA-AO-A0JE | 8.67149 | 3.65370 | 2.39164  | 2 | 4 | BRCA | 76.7  | 0 | 32   | 7    |
| TCGA-A8-A08G | 8.32710 | 3.64499 | 1.52923  | 2 | 4 | BRCA | 19.9  | 0 | 29   | 6    |
| TCGA-E9-A229 | 8.59715 | 3.64254 | 1.00246  | 2 | 4 | BRCA | 37.7  | 0 | 14   | 0    |
| TCGA-E9-A1N5 | 8.36594 | 3.63154 | 1.34087  | 2 | 4 | BRCA | 36.8  | 0 | 23   | 7    |
| TCGA-LL-A7T0 | 7.55310 | 3.62161 | 1.33006  | 2 | 4 | BRCA | 12.4  | 0 | NA   | NA   |
| TCGA-A7-A4SC | 8.59483 | 3.58167 | 2.01363  | 2 | 4 | BRCA | 14.6  | 0 | 57   | NA   |
| TCGA-A8-A07J | 8.56135 | 3.57810 | 0.49686  | 2 | 4 | BRCA | 12.0  | 0 | 33   | 8    |
| TCGA-A8-A09A | 8.16183 | 3.56868 | -4.69190 | 2 | 4 | BRCA | 10.0  | 0 | 81   | 27   |
| TCGA-BH-A0E2 | 8.10338 | 3.54733 | 0.11031  | 2 | 4 | BRCA | 14.3  | 0 | 30   | 9    |
| TCGA-A7-A0CH | 7.82328 | 3.54128 | -4.87324 | 2 | 4 | BRCA | 35.4  | 0 | 43   | 9    |
| TCGA-AO-A12A | 8.38503 | 3.51941 | 2.02533  | 2 | 4 | BRCA | 102.2 | 0 | 11   | 3    |
| TCGA-D8-A3Z5 | 8.10143 | 3.51670 | 2.29004  | 2 | 4 | BRCA | 33.3  | 0 | 14   | NA   |
| TCGA-AO-A03L | 8.11565 | 3.49963 | 0.90374  | 2 | 4 | BRCA | 80.2  | 0 | 21   | 7    |
| TCGA-AO-A03V | 7.74416 | 3.48287 | 0.02957  | 2 | 4 | BRCA | 44.4  | 0 | 44   | 16   |
| TCGA-E2-A15E | 8.37515 | 3.47936 | 1.33917  | 2 | 4 | BRCA | 20.7  | 0 | 25   | 7    |
| TCGA-E9-A3HO | 7.72690 | 3.47229 | 1.01440  | 2 | 4 | BRCA | 38.0  | 0 | 59   | NA   |
| TCGA-BH-A0EB | 8.49694 | 3.46521 | #NUM!    | 2 | 4 | BRCA | 24.5  | 0 | 27   | 5    |
| TCGA-AR-A24M | 7.91002 | 3.45725 | #NUM!    | 2 | 4 | BRCA | 120.2 | 0 | 14   | 5    |
| TCGA-A8-A08F | 8.18228 | 3.45677 | 1.72726  | 2 | 4 | BRCA | 33.0  | 0 | 92   | NA   |
| TCGA-AR-A24R | 8.07025 | 3.43297 | 0.56923  | 2 | 4 | BRCA | 112.7 | 0 | 21   | 8    |
| TCGA-A8-A07L | 8.22766 | 3.42916 | -0.03835 | 2 | 4 | BRCA | 32.0  | 0 | 78   | 17   |
| TCGA-E2-A156 | 7.84478 | 3.40103 | 2.11674  | 2 | 4 | BRCA | 23.8  | 0 | 17   | 6    |
| TCGA-5L-AAT1 | 8.50810 | 3.40048 | -2.27306 | 2 | 4 | BRCA | 48.3  | 0 | NA   | NA   |

|              |            |           |            |   |   |      |       |     |     |     |
|--------------|------------|-----------|------------|---|---|------|-------|-----|-----|-----|
| TCGA-3C-AALI | 8.50021    | 3.39511   | 0.47889    | 2 | 4 | BRCA | 131.6 | 0   | NA  | NA  |
| TCGA-A2-A0CV | 8.04266    | 3.37520   | 2.37246    | 2 | 4 | BRCA | 98.9  | 0   | 19  | 8   |
| TCGA-E2-A15A | 7.71436    | 3.37073   | #NUM!      | 2 | 4 | BRCA | 23.3  | 0   | 36  | 8   |
| TCGA-E2-A14T | 8.42594    | 3.36776   | -0.58379   | 2 | 4 | BRCA | 75.9  | 0   | 25  | 7   |
| TCGA-WT-AB44 | 8.48312    | 3.36739   | 2.08322    | 2 | 4 | BRCA | 29.0  | 0   | NA  | NA  |
| TCGA-AO-A1KS | 8.63773    | 3.35731   | #NUM!      | 2 | 4 | BRCA | 11.5  | 0   | 31  | 3   |
| TCGA-L5-A4OP | 9.97673548 | 6.3588394 | 0.5478788  | 2 | 4 | ESCA | 7.16  | 0   | 103 | NA  |
| TCGA-LN-A49S | 7.99542311 | 3.8916068 | #NUM!      | 2 | 4 | ESCA | 13.1  | 0   | 129 | NA  |
| TCGA-LN-A49M | 8.6918292  | 4.0083404 | -0.1041155 | 2 | 4 | ESCA | 12.7  | 0   | 197 | NA  |
| TCGA-LN-A7HV | 8.73858589 | 4.0758061 | -4.469194  | 2 | 4 | ESCA | 10.5  | 0   | 100 | NA  |
| TCGA-JY-A93F | 6.93986391 | 3.6475656 | 0.4069518  | 2 | 4 | ESCA | 24    | 0   | 90  | NA  |
| TCGA-E7-A8O8 | #####      | #####     | #####      | 2 | 4 | BLCA | 0     | 0   | NA  | NA  |
| TCGA-DK-A6AV | #####      | #####     | #####      | 2 | 4 | BLCA | 64    | 0   | NA  | NA  |
| TCGA-ZF-A9R2 | #####      | #####     | #####      | 2 | 4 | BLCA | 21    | 0   | NA  | NA  |
| TCGA-DK-A3IM | #####      | #####     | #NUM!      | 2 | 4 | BLCA | 8     | 1   | 86  | 19  |
| TCGA-4Z-AA81 | #####      | #####     | #####      | 2 | 4 | BLCA | 42    | 1   | NA  | NA  |
| TCGA-KQ-A41P | #####      | #####     | #NUM!      | 2 | 4 | BLCA | 36    | 0   | NA  | NA  |
| TCGA-FD-A3NA | #####      | #####     | #NUM!      | 2 | 4 | BLCA | 61    | 0   | 157 | 30  |
| TCGA-4Z-AA7Q | #####      | #####     | #####      | 2 | 4 | BLCA | 17    | 1   | NA  | NA  |
| TCGA-GC-A3BN | #####      | #####     | #NUM!      | 2 | 4 | BLCA | 21    | 1   | 104 | 17  |
| TCGA-BT-A42F | #####      | #####     | #####      | 2 | 4 | BLCA | 28    | 0   | NA  | NA  |
| TCGA-ZF-A9RM | #####      | #####     | #NUM!      | 2 | 4 | BLCA | 48    | 0   | NA  | NA  |
| TCGA-BT-A42C | #####      | #####     | #NUM!      | 2 | 4 | BLCA | 29    | 0   | 315 | 60  |
| TCGA-DK-AA77 | #####      | #####     | #####      | 2 | 4 | BLCA | 20    | 0   | NA  | NA  |
| TCGA-GV-A3QH | #####      | #####     | #NUM!      | 2 | 4 | BLCA | 8     | 1   | 165 | 43  |
| TCGA-DK-A1AB | #####      | #####     | #NUM!      | 2 | 4 | BLCA | 17    | 1   | 168 | 28  |
| TCGA-E7-A85H | #####      | #####     | #NUM!      | 2 | 4 | BLCA | 13    | 0   | NA  | NA  |
| TCGA-CU-A3KJ | #####      | #####     | #NUM!      | 2 | 4 | BLCA | 18    | 0   | 201 | 42  |
| TCGA-KQ-A41O | #####      | #####     | #####      | 2 | 4 | BLCA | 51    | 0   | NA  | NA  |
| TCGA-KQ-A41R | #####      | #####     | #####      | 2 | 4 | BLCA | 44    | 0   | NA  | NA  |
| TCGA-FD-A6TE | #####      | #####     | #NUM!      | 2 | 4 | BLCA | 12    | 0   | NA  | NA  |
| TCGA-UY-A8OC | #####      | #####     | #####      | 2 | 4 | BLCA | 3     | 1   | NA  | NA  |
| TCGA-E7-A4IJ | #####      | #####     | #####      | 2 | 4 | BLCA | 22    | 1   | NA  | NA  |
| TCGA-C4-A0F1 | #####      | #####     | #####      | 2 | 4 | BLCA | 3     | 0   | 142 | 38  |
| TCGA-DK-AA6R | #####      | #####     | #####      | 2 | 4 | BLCA | 166   | 0   | NA  | NA  |
| TCGA-UY-A9PD | #####      | #####     | #####      | 2 | 4 | BLCA | 18    | 0   | NA  | NA  |
| TCGA-PQ-A6FN | #####      | #####     | #####      | 2 | 4 | BLCA | 17    | 0   | NA  | NA  |
| TCGA-GU-AATF | #####      | #####     | #####      | 2 | 4 | BLCA | 33    | 0   | NA  | NA  |
| TCGA-YC-A9TC | #####      | #####     | #NUM!      | 2 | 4 | BLCA | 1     | 1   | NA  | NA  |
| TCGA-XF-AAMC | #####      | #####     | #NUM!      | 2 | 4 | BLCA | 111   | 0   | NA  | NA  |
| TCGA-GC-A3RC | #####      | #####     | #####      | 2 | 4 | BLCA | 16    | 0   | 295 | 73  |
| TCGA-4Z-AA7R | #####      | #####     | #NUM!      | 2 | 4 | BLCA | 17    | 1   | NA  | NA  |
| TCGA-ZF-AA53 | #####      | #####     | #####      | 2 | 4 | BLCA | 58    | 0   | NA  | NA  |
| TCGA-FD-A5C1 | #####      | #####     | #####      | 2 | 4 | BLCA | 59    | 0   | NA  | NA  |
| TCGA-BT-A20Q | #####      | #####     | #####      | 2 | 4 | BLCA | 19    | 1   | 95  | 17  |
| TCGA-BT-A0YX | #####      | #####     | #####      | 2 | 4 | BLCA | 13    | 1   | 557 | 108 |
| TCGA-4Z-AA7W | #####      | #####     | #####      | 2 | 4 | BLCA | 28    | 0   | NA  | NA  |
| TCGA-XF-AAML | #####      | #####     | #####      | 2 | 4 | BLCA | 8     | 1   | NA  | NA  |
| TCGA-FD-A5BY | #####      | #####     | #NUM!      | 2 | 4 | BLCA | 8     | 0   | NA  | NA  |
| TCGA-EJ-A46I | 7.536821   | 2.201756  | 0.201747   | 2 | 4 | PRAD | 21.94 | 0.0 | 11  | 3   |
| TCGA-EJ-A46E | 7.006874   | 2.186881  | 0.186881   | 2 | 4 | PRAD | 17.21 | 0.0 | 8   | 1   |
| TCGA-EJ-5518 | 7.193668   | 1.849919  | 0.171847   | 2 | 4 | PRAD | 69.58 | 0.0 | 42  | 8   |
| TCGA-2A-AAYO | 7.325564   | 2.068705  | 0.068740   | 2 | 4 | PRAD | 41.79 | 0.0 | NA  | NA  |
| TCGA-EJ-A6RA | 7.083511   | 2.177149  | 0.007181   | 2 | 4 | PRAD | 11.60 | 0.0 | NA  | NA  |

|              |          |          |           |   |   |      |       |     |     |     |
|--------------|----------|----------|-----------|---|---|------|-------|-----|-----|-----|
| TCGA-YL-A9WY | 7.496454 | 2.111165 | -0.004335 | 2 | 4 | PRAD | 36.07 | 0.0 | NA  | NA  |
| TCGA-EJ-8470 | 7.453197 | 1.150163 | -0.072179 | 2 | 4 | PRAD | 38.07 | 0.0 | 28  | 5   |
| TCGA-EJ-5517 | 7.298400 | 2.420237 | -0.082225 | 2 | 4 | PRAD | 62.06 | 0.0 | 32  | 5   |
| TCGA-KK-A8I7 | 7.022433 | 2.115965 | -0.205913 | 2 | 4 | PRAD | 65.77 | 0.0 | NA  | NA  |
| TCGA-EJ-A7NN | 7.248907 | 1.362217 | -0.222801 | 2 | 4 | PRAD | 6.47  | 0.0 | NA  | NA  |
| TCGA-VP-A878 | 7.237631 | 1.352301 | -0.232616 | 2 | 4 | PRAD | ####  | 0.0 | NA  | NA  |
| TCGA-G9-7522 | 7.392074 | 1.473319 | -0.263629 | 2 | 4 | PRAD | 35.41 | 0.0 | 23  | 3   |
| TCGA-EJ-5527 | 7.260090 | 1.701460 | -0.298495 | 2 | 4 | PRAD | 58.41 | 0.0 | 49  | 6   |
| TCGA-CH-5772 | 7.555680 | 1.245800 | -0.339181 | 2 | 4 | PRAD | 15.97 | 0.0 | 70  | 17  |
| TCGA-V1-A9OQ | 7.041097 | 1.640204 | -0.359768 | 2 | 4 | PRAD | 12.19 | 0.0 | NA  | NA  |
| TCGA-G9-6499 | 7.308972 | 1.338225 | -0.469130 | 2 | 4 | PRAD | 50.69 | 0.0 | 64  | 12  |
| TCGA-EJ-5505 | 7.344296 | 1.836490 | -0.485398 | 2 | 4 | PRAD | 30.29 | 0.0 | 33  | 9   |
| TCGA-HC-7821 | 7.455775 | 1.298007 | -0.509225 | 2 | 4 | PRAD | 31.41 | 0.0 | 35  | 5   |
| TCGA-ZG-A9L1 | 7.026792 | 1.704872 | -0.617056 | 2 | 4 | PRAD | 42.77 | 0.0 | NA  | NA  |
| TCGA-EJ-5525 | 7.252057 | 1.328262 | -0.671853 | 2 | 4 | PRAD | 36.63 | 0.0 | 65  | 21  |
| TCGA-HC-7075 | 7.401727 | 1.116292 | -0.691080 | 2 | 4 | PRAD | 19.74 | 0.0 | 34  | 8   |
| TCGA-HC-7750 | 7.364442 | 3.245753 | -0.754164 | 2 | 4 | PRAD | 17.15 | 0.0 | 36  | 5   |
| TCGA-YL-A8SO | 6.906891 | 1.415056 | -0.906981 | 2 | 4 | PRAD | ####  | 0.0 | NA  | NA  |
| TCGA-HC-8216 | 7.449547 | 1.797470 | -1.009873 | 2 | 4 | PRAD | 22.40 | 0.0 | 106 | 16  |
| TCGA-G9-6343 | 7.008040 | 2.434052 | -1.025324 | 2 | 4 | PRAD | 80.49 | 0.0 | 21  | 5   |
| TCGA-CH-5769 | 7.322233 | 1.506450 | -1.078594 | 2 | 4 | PRAD | 2.04  | 0.0 | 99  | 25  |
| TCGA-HC-A6AC | 6.560894 | 2.058382 | -1.111570 | 2 | 4 | PRAD | 17.41 | 0.0 | 27  | 5   |
| TCGA-EJ-5504 | 7.177165 | 1.824035 | -1.175957 | 2 | 4 | PRAD | 46.88 | 0.0 | 55  | 4   |
| TCGA-ZG-A9LY | 6.786182 | 1.567351 | -1.239907 | 2 | 4 | PRAD | 12.16 | 0.0 | NA  | NA  |
| TCGA-FC-A4JI | 6.835231 | 1.144693 | -1.440303 | 2 | 4 | PRAD | 28.81 | 0.0 | 29  | 6   |
| TCGA-KK-A59V | 6.783061 | 2.535130 | #NUM!     | 2 | 4 | PRAD | ####  | 0.0 | 853 | 238 |
| TCGA-KK-A8IK | 7.320923 | 2.325930 | #NUM!     | 2 | 4 | PRAD | 67.41 | 0.0 | NA  | NA  |
| TCGA-CH-5739 | 7.575277 | 2.253835 | #NUM!     | 2 | 4 | PRAD | 22.04 | 0.0 | 33  | 5   |
| TCGA-KK-A8IH | 7.222685 | 2.229126 | #NUM!     | 2 | 4 | PRAD | 66.13 | 0.0 | NA  | NA  |
| TCGA-XK-AAIV | 7.507723 | 2.028353 | #NUM!     | 2 | 4 | PRAD | 37.22 | 0.0 | NA  | NA  |
| TCGA-CH-5751 | 7.570092 | 1.861757 | #NUM!     | 2 | 4 | PRAD | 34.99 | 0.0 | 34  | 2   |
| TCGA-HC-A9TH | 6.878015 | 1.278817 | #NUM!     | 2 | 4 | PRAD | 27.73 | 0.0 | NA  | NA  |
| TCGA-EJ-8469 | 7.161306 | 1.270529 | #NUM!     | 2 | 4 | PRAD | 76.35 | 0.0 | 54  | 11  |
| TCGA-G9-A9S4 | 6.854011 | 1.099086 | #NUM!     | 2 | 4 | PRAD | 29.76 | 0.0 | NA  | NA  |
| TCGA-HV-A7OP | 7.4057   | 7.0967   | #NUM!     | 2 | 4 | PAAD | 32.13 | 0.0 | NA  | NA  |
| TCGA-IB-7888 | 9.4016   | 4.3479   | 0.1384    | 2 | 4 | PAAD | 43.76 | 1.0 | 88  | NA  |
| TCGA-HZ-8003 | 9.2583   | 4.1562   | 0.0687    | 2 | 4 | PAAD | 19.58 | 1.0 | 59  | NA  |
| TCGA-HZ-7925 | 8.8702   | 3.9128   | 0.9127    | 2 | 4 | PAAD | 20.17 | 1.0 | 296 | NA  |
| TCGA-IB-7645 | 8.9074   | 3.8214   | 0.3189    | 2 | 4 | PAAD | 49.34 | 1.0 | 60  | NA  |
| TCGA-IB-7889 | 9.2548   | 3.7652   | 0.3058    | 2 | 4 | PAAD | 15.80 | 1.0 | 62  | NA  |
| TCGA-HV-A7OL | 9.6434   | 3.7608   | 0.8863    | 2 | 4 | PAAD | 8.28  | 0.0 | 115 | NA  |
| TCGA-IB-A5SQ | 9.2607   | 3.7262   | -1.0289   | 2 | 4 | PAAD | 7.19  | 1.0 | 80  | NA  |
| TCGA-2J-AAB9 | 9.4686   | 3.6850   | #NUM!     | 2 | 4 | PAAD | 20.60 | 1.0 | 39  | NA  |
| TCGA-HZ-8002 | 9.4008   | 3.6413   | -1.4880   | 2 | 4 | PAAD | 12.02 | 1.0 | 102 | NA  |
| TCGA-IB-A5SO | 9.0231   | 3.6321   | 0.9540    | 2 | 4 | PAAD | 11.99 | 1.0 | 76  | NA  |
| TCGA-IB-A5SS | 9.1660   | 3.4097   | -1.3978   | 2 | 4 | PAAD | 15.11 | 1.0 | 84  | NA  |
| TCGA-IB-7647 | 9.1827   | 3.3861   | -0.3509   | 2 | 4 | PAAD | 21.88 | 1.0 | 69  | NA  |
| TCGA-3A-A9IC | 9.0877   | 3.3040   | 0.5671    | 2 | 4 | PAAD | 24.24 | 1.0 | 64  | NA  |
| TCGA-F2-7273 | 9.3701   | 3.2601   | 0.6752    | 2 | 4 | PAAD | 19.45 | 1.0 | NA  | NA  |
| TCGA-IB-AAUT | 9.5613   | 3.2584   | -0.7415   | 2 | 4 | PAAD | 9.43  | 0.0 | 47  | NA  |
| TCGA-HZ-7918 | 9.4553   | 3.1696   | #NUM!     | 2 | 4 | PAAD | 31.83 | 0.0 | NA  | NA  |
| TCGA-XN-A8T3 | 8.7722   | 3.1645   | 0.0771    | 2 | 4 | PAAD | 31.24 | 0.0 | 110 | NA  |
| TCGA-IB-7890 | 9.0655   | 3.1229   | -0.9647   | 2 | 4 | PAAD | 19.65 | 1.0 | 73  | NA  |
| TCGA-H6-A45N | 9.4574   | 3.0999   | #NUM!     | 2 | 4 | PAAD | 13.83 | 1.0 | 49  | NA  |

|              |          |          |           |   |   |      |       |     |       |    |
|--------------|----------|----------|-----------|---|---|------|-------|-----|-------|----|
| TCGA-3A-A9IH | 9.4021   | 3.0234   | #NUM!     | 2 | 4 | PAAD | 33.54 | 0.0 | 76    | NA |
| TCGA-FB-AAPY | 9.5639   | 3.0225   | #NUM!     | 2 | 4 | PAAD | 34.79 | 1.0 | 61    | NA |
| TCGA-IB-7651 | 9.3974   | 2.8740   | #NUM!     | 2 | 4 | PAAD | 19.81 | 1.0 | 15367 | NA |
| TCGA-F2-A7TX | 9.0594   | 2.8148   | -0.1852   | 2 | 4 | PAAD | 3.12  | 1.0 | 68    | NA |
| TCGA-IB-7893 | 9.2888   | 2.7542   | #NUM!     | 2 | 4 | PAAD | 3.84  | 1.0 | 56    | NA |
| TCGA-A4-A48D | 7.266294 | 5.919490 | #NUM!     | 2 | 4 | KIRP | 12    | 0.0 | 123   | 26 |
| TCGA-BQ-5886 | 7.447317 | 5.647254 | #NUM!     | 2 | 4 | KIRP | 26    | 0.0 | 24    | 15 |
| TCGA-A4-8518 | 7.774972 | 5.642869 | #NUM!     | 2 | 4 | KIRP | 20    | 0.0 | 46    | 2  |
| TCGA-P4-A5E6 | 7.063692 | 5.635699 | #NUM!     | 2 | 4 | KIRP | 100   | 0.0 | 95    | 32 |
| TCGA-GL-A4EM | 7.714336 | 5.527111 | #NUM!     | 2 | 4 | KIRP | 1     | 0.0 | 173   | 14 |
| TCGA-5P-A9KE | 7.280775 | 5.293683 | #NUM!     | 2 | 4 | KIRP | 27    | 0.0 | NA    | NA |
| TCGA-P4-AAVM | 7.328441 | 4.882183 | #NUM!     | 2 | 4 | KIRP | 51    | 0.0 | NA    | NA |
| TCGA-DW-7839 | 6.653951 | 4.851894 | #NUM!     | 2 | 4 | KIRP | 14    | 0.0 | 81    | 18 |
| TCGA-BQ-5878 | 7.746013 | 4.774144 | -1.840629 | 2 | 4 | KIRP | 64    | 0.0 | 57    | 18 |
| TCGA-HE-A5NK | 7.632694 | 4.646635 | #NUM!     | 2 | 4 | KIRP | 73    | 0.0 | 72    | 24 |
| TCGA-A4-8098 | 7.253414 | 4.597501 | #NUM!     | 2 | 4 | KIRP | 29    | 0.0 | 65    | 12 |
| TCGA-GL-A9DC | 7.928723 | 4.504512 | #NUM!     | 2 | 4 | KIRP | 13    | 0.0 | NA    | NA |
| TCGA-BQ-7045 | 7.819183 | 4.389194 | #NUM!     | 2 | 4 | KIRP | 48    | 1.0 | 19    | 19 |
| TCGA-2Z-A9J8 | 7.365811 | 4.348183 | #NUM!     | 2 | 4 | KIRP | 92    | 0.0 | NA    | NA |
| TCGA-BQ-7060 | 7.942034 | 4.275618 | #NUM!     | 2 | 4 | KIRP | 7     | 0.0 | 70    | 11 |
| TCGA-P4-A5ED | 7.477673 | 4.128944 | #NUM!     | 2 | 4 | KIRP | 93    | 0.0 | NA    | 8  |
| TCGA-SX-A7SP | 7.485257 | 3.998078 | #NUM!     | 2 | 4 | KIRP | 16    | 1.0 | NA    | NA |
| TCGA-MH-A560 | 6.892996 | 3.675771 | #NUM!     | 2 | 4 | KIRP | 30    | 0.0 | 103   | 9  |
| TCGA-2Z-A9J5 | 7.906891 | 3.649499 | #NUM!     | 2 | 4 | KIRP | 100   | 0.0 | NA    | NA |
| TCGA-A4-A5XZ | 7.961851 | 3.444904 | #NUM!     | 2 | 4 | KIRP | 16    | 0.0 | 60    | 24 |
| TCGA-5P-A9JW | 7.562475 | 3.444083 | #NUM!     | 2 | 4 | KIRP | 106   | 0.0 | NA    | NA |
| TCGA-A4-8630 | 7.293059 | 3.435080 | #NUM!     | 2 | 4 | KIRP | 14    | 0.0 | 110   | 13 |
| TCGA-5P-A9K0 | 7.500078 | 3.425728 | #NUM!     | 2 | 4 | KIRP | 22    | 0.0 | NA    | NA |
| TCGA-WN-AB4C | 7.820985 | 3.395927 | #NUM!     | 2 | 4 | KIRP | 39    | 0.0 | NA    | NA |
| TCGA-2Z-A9JN | 6.990279 | 3.360925 | #NUM!     | 2 | 4 | KIRP | 24    | 0.0 | NA    | NA |
| TCGA-BQ-5880 | 7.898823 | 3.272829 | #NUM!     | 2 | 4 | KIRP | 43    | 1.0 | 67    | 17 |
| TCGA-A4-8517 | 7.653957 | 3.227695 | #NUM!     | 2 | 4 | KIRP | 20    | 0.0 | 17    | 16 |
| TCGA-UZ-A9PS | 7.068328 | 3.177886 | #NUM!     | 2 | 4 | KIRP | 71    | 0.0 | NA    | NA |
| TCGA-Y8-A894 | 7.082467 | 3.144014 | #NUM!     | 2 | 4 | KIRP | 19    | 0.0 | NA    | NA |
| TCGA-2Z-A9J2 | 7.487108 | 3.116448 | #NUM!     | 2 | 4 | KIRP | 59    | 0.0 | NA    | NA |
| TCGA-BQ-5884 | 7.895111 | 3.022066 | -2.107182 | 2 | 4 | KIRP | 26    | 0.0 | 104   | 14 |
| TCGA-5P-A9K8 | 7.475315 | 3.011585 | #NUM!     | 2 | 4 | KIRP | 43    | 0.0 | NA    | NA |
| TCGA-Y8-A897 | 7.665145 | 2.972435 | #NUM!     | 2 | 4 | KIRP | 18    | 0.0 | NA    | NA |
| TCGA-SX-A7SQ | 8.088773 | 2.948675 | #NUM!     | 2 | 4 | KIRP | 42    | 0.0 | NA    | NA |
| TCGA-G7-6797 | 7.265917 | 2.888402 | #NUM!     | 2 | 4 | KIRP | 25    | 0.0 | 57    | 29 |
| TCGA-GL-7773 | 7.857023 | 2.714070 | #NUM!     | 2 | 4 | KIRP | 13    | 0.0 | 65    | 29 |
| TCGA-B3-3926 | 7.657187 | 2.622766 | #NUM!     | 2 | 4 | KIRP | 29    | 0.0 | 244   | 5  |
| TCGA-B3-A6W5 | 7.794798 | 2.556405 | #NUM!     | 2 | 4 | KIRP | 10    | 0.0 | 56    | NA |
| TCGA-A4-A6HP | 7.122012 | 2.552156 | #NUM!     | 2 | 4 | KIRP | 12    | 0.0 | NA    | 36 |
| TCGA-UZ-A9Q1 | 7.063340 | 2.526394 | #NUM!     | 2 | 4 | KIRP | 51    | 0.0 | NA    | NA |
| TCGA-2Z-A9JQ | 7.856755 | 2.485195 | #NUM!     | 2 | 4 | KIRP | 26    | 0.0 | NA    | NA |
| TCGA-AL-3471 | 7.649467 | 2.459641 | #NUM!     | 2 | 4 | KIRP | 49    | 1.0 | 31    | NA |
| TCGA-A4-8310 | 8.012270 | 2.302612 | #NUM!     | 2 | 4 | KIRP | 26    | 0.0 | 38    | 21 |
| TCGA-P4-A5EB | 7.895395 | 2.296634 | #NUM!     | 2 | 4 | KIRP | 99    | 0.0 | 33    | 34 |
| TCGA-B9-A5W8 | 7.745309 | 2.241474 | #NUM!     | 2 | 4 | KIRP | 17    | 0.0 | 64    | 15 |
| TCGA-P4-A5EA | 7.383982 | 2.196985 | #NUM!     | 2 | 4 | KIRP | 7     | 1.0 | NA    | 18 |
| TCGA-BQ-5894 | 6.569032 | 2.170470 | #NUM!     | 2 | 4 | KIRP | 3     | 0.0 | 67    | 5  |
| TCGA-A4-8312 | 7.403200 | 2.089294 | #NUM!     | 2 | 4 | KIRP | 23    | 0.0 | 106   | 1  |
| TCGA-MH-A562 | 7.904421 | 2.078780 | #NUM!     | 2 | 4 | KIRP | 20    | 0.0 | NA    | 23 |

|              |          |          |       |   |   |       |    |     |      |      |
|--------------|----------|----------|-------|---|---|-------|----|-----|------|------|
| TCGA-IZ-8195 | 7.733380 | 2.052903 | #NUM! | 2 | 4 | KIRP  | 22 | 0.0 | 158  | 13   |
| TCGA-G7-A8LC | 7.698680 | 2.038436 | #NUM! | 2 | 4 | KIRP  | 23 | 0.0 | 121  | NA   |
| TCGA-KV-A6GE | 7.954238 | 1.994869 | #NUM! | 2 | 4 | KIRP  | 29 | 0.0 | NA   | 13   |
| TCGA-BQ-7050 | 8.174619 | 1.980903 | #NUM! | 2 | 4 | KIRP  | 61 | 0.0 | 78   | 8    |
| TCGA-2Z-A9JE | 7.598619 | 1.976584 | #NUM! | 2 | 4 | KIRP  | 57 | 0.0 | NA   | NA   |
| TCGA-2Z-A9JO | 6.956397 | 1.877665 | #NUM! | 2 | 4 | KIRP  | 31 | 0.0 | NA   | NA   |
| TCGA-AL-3467 | 7.009701 | 1.778418 | #NUM! | 2 | 4 | KIRP  | 70 | 0.0 | 47   | 5    |
| TCGA-Y8-A8RY | 7.894073 | 1.762859 | #NUM! | 2 | 4 | KIRP  | 25 | 0.0 | NA   | NA   |
| TCGA-A4-7915 | 5.077393 | 1.634453 | #NUM! | 2 | 4 | KIRP  | 0  | 0.0 | 61   | 4    |
| TCGA-GL-8500 | 6.684273 | 1.537743 | #NUM! | 2 | 4 | KIRP  | 28 | 0.0 | 68   | 14   |
| TCGA-SX-A71V | 7.577957 | 1.441802 | #NUM! | 2 | 4 | KIRP  | 29 | 0.0 | NA   | NA   |
| TCGA-A4-A772 | 8.126525 | 1.281312 | #NUM! | 2 | 4 | KIRP  | 0  | 0.0 | NA   | NA   |
| TCGA-BQ-7056 | 7.177482 | 1.237013 | #NUM! | 2 | 4 | KIRP  | 20 | 0.0 | 74   | 11   |
| TCGA-A4-7288 | 7.874383 | 1.210076 | #NUM! | 2 | 4 | KIRP  | 61 | 0.0 | 55   | 14   |
| TCGA-B9-A5W9 | 7.252660 | 1.195851 | #NUM! | 2 | 4 | KIRP  | 0  | 0.0 | 83   | 12   |
| TCGA-GL-A9DE | 8.055240 | 1.134155 | #NUM! | 2 | 4 | KIRP  | 16 | 0.0 | 37   | NA   |
| TCGA-IA-A40U | 7.871180 | 0.992116 | #NUM! | 2 | 4 | KIRP  | 17 | 0.0 | 29   | 11   |
| TCGA-A4-8516 | 7.551862 | 0.851998 | #NUM! | 2 | 4 | KIRP  | 1  | 0.0 | 70   | NA   |
| TCGA-A4-A4ZT | 7.960617 | 0.838185 | #NUM! | 2 | 4 | KIRP  | 17 | 0.0 | 36   | 22   |
| TCGA-DZ-6133 | 8.045170 | 0.685357 | #NUM! | 2 | 4 | KIRP  | 51 | 1.0 | 24   | 28   |
| TCGA-BQ-5879 | 5.067682 | 0.641454 | #NUM! | 2 | 4 | KIRP  | 23 | 1.0 | 56   | 5    |
| TCGA-A4-7828 | 8.104898 | 0.618521 | #NUM! | 2 | 4 | KIRP  | 8  | 0.0 | 25   | 8    |
| TCGA-GL-7966 | 5.499699 | 0.617016 | #NUM! | 2 | 4 | KIRP  | 4  | 0.0 | 145  | 10   |
| TCGA-SX-A7SL | 7.465737 | 0.351967 | #NUM! | 2 | 4 | KIRP  | 27 | 0.0 | NA   | NA   |
| TCGA-DZ-6131 | 7.702200 | 0.305795 | #NUM! | 2 | 4 | KIRP  | 80 | 0.0 | 103  | 6    |
| TCGA-UN-AAZ9 | 7.169755 | 0.277984 | #NUM! | 2 | 4 | KIRP  | 18 | 0.0 | NA   | NA   |
| TCGA-DW-7842 | 7.965297 | 0.271426 | #NUM! | 2 | 4 | KIRP  | 3  | 0.0 | 37   | 5    |
| TCGA-BQ-7055 | 6.961655 | 0.193456 | #NUM! | 2 | 4 | KIRP  | 26 | 0.0 | 60   | 4    |
| TCGA-DM-A0XF | #####    | #####    | ##### | 2 | 4 | Colon | 38 | 1.0 | 53   | NA   |
| TCGA-D5-6541 | #####    | #####    | ##### | 2 | 4 | Colon | 16 | 0.0 | 34   | NA   |
| TCGA-AA-3527 | #####    | #####    | ##### | 2 | 4 | Colon | 0  | 0.0 | #N/A | #N/A |
| TCGA-A6-2683 | #####    | #####    | ##### | 2 | 4 | Colon | 17 | 1.0 | #N/A | #N/A |
| TCGA-AA-A02F | #####    | #####    | ##### | 2 | 4 | Colon | 40 | 0.0 | #N/A | #N/A |
| TCGA-AA-3973 | #####    | #####    | ##### | 2 | 4 | Colon | 13 | 0.0 | #N/A | #N/A |
| TCGA-AA-3712 | #####    | #####    | ##### | 2 | 4 | Colon | 0  | 0.0 | 149  | NA   |
| TCGA-AA-A02H | #####    | #####    | ##### | 2 | 4 | Colon | 2  | 1.0 | #N/A | #N/A |
| TCGA-A6-A5ZU | #####    | #####    | ##### | 2 | 4 | Colon | 10 | 0.0 | NA   | NA   |
| TCGA-A6-6652 | #####    | #####    | #NUM! | 2 | 4 | Colon | 25 | 0.0 | 29   | NA   |
| TCGA-AA-3561 | #####    | #####    | ##### | 2 | 4 | Colon | 14 | 0.0 | #N/A | #N/A |
| TCGA-AA-3666 | #####    | #####    | ##### | 2 | 4 | Colon | 2  | 1.0 | #N/A | #N/A |
| TCGA-A6-5662 | #####    | #####    | ##### | 2 | 4 | Colon | 24 | 0.0 | 32   | NA   |
| TCGA-CA-6718 | #####    | #####    | ##### | 2 | 4 | Colon | 10 | 1.0 | 1143 | NA   |
| TCGA-AA-3968 | #####    | #####    | ##### | 2 | 4 | Colon | 22 | 0.0 | #N/A | #N/A |
| TCGA-AA-3952 | #####    | #####    | ##### | 2 | 4 | Colon | 2  | 1.0 | #N/A | #N/A |
| TCGA-F4-6855 | #####    | #####    | #NUM! | 2 | 4 | Colon | 47 | 0.0 | 51   | NA   |
| TCGA-G4-6294 | #####    | #####    | #NUM! | 2 | 4 | Colon | 28 | 1.0 | 70   | NA   |
| TCGA-AA-3549 | #####    | #####    | ##### | 2 | 4 | Colon | 21 | 0.0 | #N/A | #N/A |
| TCGA-AA-3494 | #####    | #####    | ##### | 2 | 4 | Colon | 1  | 0.0 | #N/A | #N/A |
| TCGA-NH-A8F7 | #####    | #####    | ##### | 2 | 4 | Colon | 18 | 0.0 | NA   | NA   |
| TCGA-D5-5537 | #####    | #####    | ##### | 2 | 4 | Colon | 45 | 1.0 | 40   | NA   |
| TCGA-AA-A02O | #####    | #####    | ##### | 2 | 4 | Colon | 1  | 0.0 | #N/A | #N/A |
| TCGA-AA-A02Y | #####    | #####    | ##### | 2 | 4 | Colon | 40 | 0.0 | NA   | NA   |
| TCGA-AA-3869 | #####    | #####    | ##### | 2 | 4 | Colon | 27 | 1.0 | #N/A | #N/A |
| TCGA-DM-A0XC | #####    | #####    | ##### | 2 | 4 | Colon | 24 | 1.0 | 74   | NA   |

|              |            |           |            |   |   |       |       |     |      |      |
|--------------|------------|-----------|------------|---|---|-------|-------|-----|------|------|
| TCGA-F4-6805 | #####      | #####     | #####      | 2 | 4 | Colon | 34    | 0.0 | 14   | NA   |
| TCGA-AD-6548 | #####      | #####     | #####      | 2 | 4 | Colon | 21    | 0.0 | 41   | NA   |
| TCGA-AA-3956 | #####      | #####     | #####      | 2 | 4 | Colon | 34    | 0.0 | #N/A | #N/A |
| TCGA-A6-A567 | #####      | #####     | #####      | 2 | 4 | Colon | 62    | 1.0 | NA   | NA   |
| TCGA-AA-3562 | #####      | #####     | #####      | 2 | 4 | Colon | 20    | 0.0 | #N/A | #N/A |
| TCGA-AA-3851 | #####      | #####     | #####      | 2 | 4 | Colon | 33    | 0.0 | #N/A | #N/A |
| TCGA-AA-3866 | #####      | #####     | #####      | 2 | 4 | Colon | 17    | 0.0 | #N/A | #N/A |
| TCGA-G4-6625 | #####      | #####     | #####      | 2 | 4 | Colon | 92    | 0.0 | 31   | NA   |
| TCGA-NH-A6GE | #####      | #####     | #####      | 2 | 4 | Colon | 16    | 0.0 | NA   | NA   |
| TCGA-AA-3552 | #####      | #####     | #####      | 2 | 4 | Colon | 13    | 1.0 | #N/A | #N/A |
| TCGA-AA-3844 | #####      | #####     | #####      | 2 | 4 | Colon | 15    | 0.0 | #N/A | #N/A |
| TCGA-AA-A00Z | #####      | #####     | #####      | 2 | 4 | Colon | 22    | 0.0 | #N/A | #N/A |
| TCGA-AA-A00E | #####      | #####     | #####      | 2 | 4 | Colon | 30    | 0.0 | #N/A | #N/A |
| TCGA-AA-3819 | #####      | #####     | #####      | 2 | 4 | Colon | 25    | 0.0 | #N/A | #N/A |
| TCGA-AA-3850 | #####      | #####     | #####      | 2 | 4 | Colon | 0     | 1.0 | #N/A | #N/A |
| TCGA-NH-A8F8 | #####      | #####     | #####      | 2 | 4 | Colon | 17    | 1.0 | NA   | NA   |
| TCGA-AA-3688 | #####      | #####     | #####      | 2 | 4 | Colon | 19    | 0.0 | #N/A | #N/A |
| TCGA-AA-3867 | #####      | #####     | #####      | 2 | 4 | Colon | 24    | 0.0 | #N/A | #N/A |
| TCGA-5M-AATE | #####      | #####     | #####      | 2 | 4 | Colon | 39    | 0.0 | NA   | NA   |
| TCGA-CK-4948 | #####      | #####     | #####      | 2 | 4 | Colon | 148   | 0.0 | 42   | NA   |
| TCGA-AD-6963 | #####      | #####     | #####      | 2 | 4 | Colon | 27    | 0.0 | 29   | NA   |
| TCGA-5M-AAT4 | #####      | #####     | #####      | 2 | 4 | Colon | 2     | 1.0 | NA   | NA   |
| TCGA-AZ-6600 | #####      | #####     | #####      | 2 | 4 | Colon | 12    | 1.0 | 46   | NA   |
| TCGA-D5-5538 | #####      | #####     | #####      | 2 | 4 | Colon | 55    | 1.0 | 42   | NA   |
| TCGA-D5-6927 | #####      | #####     | #####      | 2 | 4 | Colon | 9     | 0.0 | 298  | NA   |
| TCGA-D5-6535 | #####      | #####     | #####      | 2 | 4 | Colon | 15    | 0.0 | 64   | NA   |
| TCGA-G4-6627 | #####      | #####     | #####      | 2 | 4 | Colon | 75    | 0.0 | NA   | NA   |
| TCGA-AA-3522 | #####      | #####     | #####      | 2 | 4 | Colon | 37    | 0.0 | #N/A | #N/A |
| TCGA-A6-3808 | #####      | #####     | #####      | 2 | 4 | Colon | 33    | 0.0 | #N/A | #N/A |
| TCGA-AA-3554 | #####      | #####     | #####      | 2 | 4 | Colon | 18    | 0.0 | #N/A | #N/A |
| TCGA-CM-6161 | #####      | #####     | #####      | 2 | 4 | Colon | 15    | 0.0 | 33   | NA   |
| TCGA-A6-4105 | #####      | #####     | #####      | 2 | 4 | Colon | 15    | 1.0 | 54   | NA   |
| TCGA-CM-6164 | #####      | #####     | #####      | 2 | 4 | Colon | 29    | 0.0 | 28   | NA   |
| TCGA-A6-6781 | #####      | #####     | #NUM!      | 2 | 4 | Colon | 20    | 0.0 | 751  | NA   |
| TCGA-CM-4748 | #####      | #####     | #####      | 2 | 4 | Colon | 26    | 0.0 | #N/A | #N/A |
| TCGA-CK-6748 | #####      | #####     | #NUM!      | 2 | 4 | Colon | 2     | 0.0 | NA   | NA   |
| TCGA-AD-6899 | #####      | #####     | #####      | 2 | 4 | Colon | 6     | 1.0 | 51   | NA   |
| TCGA-AA-3950 | #####      | #####     | #####      | 2 | 4 | Colon | 24    | 0.0 | #N/A | #N/A |
| TCGA-AA-A00N | #####      | #####     | #####      | 2 | 4 | Colon | 4     | 1.0 | #N/A | #N/A |
| TCGA-D5-7000 | #####      | #####     | #####      | 2 | 4 | Colon | 10    | 0.0 | 59   | NA   |
| TCGA-DM-A288 | #####      | #####     | #####      | 2 | 4 | Colon | 14    | 1.0 | NA   | NA   |
| TCGA-CM-6162 | #####      | #####     | #####      | 2 | 4 | Colon | 12    | 0.0 | 431  | NA   |
| TCGA-A6-2674 | #####      | #####     | #####      | 2 | 4 | Colon | 44    | 0.0 | #N/A | #N/A |
| TCGA-CV-A465 | 6.37515589 | 1.366588  | -0.955396  | 2 | 4 | HNSC  | 7.06  | 1.0 | NA   | NA   |
| TCGA-CN-5365 | 6.66815885 | 1.1891604 | -1.1328943 | 2 | 4 | HNSC  | 11.53 | 1.0 | 78   | 13   |
| TCGA-BA-4076 | 6.34576538 | 0.6546188 | #NUM!      | 2 | 4 | HNSC  | 13.63 | 1.0 | 282  | 30   |
| TCGA-HD-A4C1 | 7.05303312 | 1.131787  | #NUM!      | 2 | 4 | HNSC  | 0.36  | 0.0 | NA   | NA   |
| TCGA-CV-7409 | 6.601071   | 1.922997  | -1.3989691 | 2 | 4 | HNSC  | 17.84 | 1.0 | NA   | NA   |
| TCGA-BB-7863 | 6.37881678 | 0.6950139 | -1.3050752 | 2 | 4 | HNSC  | 33.67 | 0.0 | NA   | NA   |
| TCGA-DQ-5624 | 6.84147252 | 1.1699891 | #NUM!      | 2 | 4 | HNSC  | 58.41 | 0.0 | 93   | 17   |
| TCGA-BA-4077 | 6.93348884 | 2.8516991 | #NUM!      | 2 | 4 | HNSC  | 37.25 | 1.0 | 276  | NA   |
| TCGA-P3-A6T2 | 6.37257606 | 0.3689359 | #NUM!      | 2 | 4 | HNSC  | 99999 | 0.0 | NA   | NA   |
| TCGA-BA-A4II | 6.60326581 | 1.4201859 | #NUM!      | 2 | 4 | HNSC  | 30.16 | 0.0 | NA   | NA   |
| TCGA-BA-6872 | 6.89681191 | 0.8818995 | #NUM!      | 2 | 4 | HNSC  | 12.61 | 1.0 | 158  | 43   |

|              |            |           |            |   |   |      |        |     |     |    |
|--------------|------------|-----------|------------|---|---|------|--------|-----|-----|----|
| TCGA-BB-A5HU | 7.040008   | 4.3827018 | #NUM!      | 2 | 4 | HNSC | 25.69  | 0.0 | NA  | NA |
| TCGA-DQ-7594 | 6.91648978 | 2.1054099 | #NUM!      | 2 | 4 | HNSC | 40.01  | 0.0 | NA  | NA |
| TCGA-CV-7428 | 6.8224918  | 1.000577  | #NUM!      | 2 | 4 | HNSC | 54.89  | 1.0 | NA  | NA |
| TCGA-P3-A5QF | 5.73191364 | 0.8990209 | #NUM!      | 2 | 4 | HNSC | 10.84  | 1.0 | NA  | NA |
| TCGA-CV-7406 | 6.78310039 | 3.6942005 | -1.5911795 | 2 | 4 | HNSC | 57.42  | 1.0 | 160 | NA |
| TCGA-T2-A6X0 | 6.25250081 | 1.4976379 | #NUM!      | 2 | 4 | HNSC | 7.1    | 0.0 | NA  | NA |
| TCGA-BA-4075 | 6.90114445 | 0.6851777 | #NUM!      | 2 | 4 | HNSC | 00000  | 1.0 | NA  | NA |
| TCGA-D6-A6ES | 5.15497604 | 4.7043187 | #NUM!      | 2 | 4 | HNSC | 12.78  | 0.0 | NA  | NA |
| TCGA-BA-A8YP | 7.03366086 | 1.0250288 | #NUM!      | 2 | 4 | HNSC | 16.39  | 0.0 | NA  | NA |
| TCGA-CN-5366 | 7.01589671 | 1.3122005 | -1.4953288 | 2 | 4 | HNSC | 11.83  | 1.0 | 93  | 15 |
| TCGA-CV-5440 | 6.81064875 | 2.7021256 | #NUM!      | 2 | 4 | HNSC | 107.42 | 0.0 | 102 | 26 |
| TCGA-BB-A6UV | 6.13283591 | 0.8773516 | -1.4445765 | 2 | 4 | HNSC | 12.91  | 0.0 | NA  | NA |
| TCGA-DQ-5625 | 6.9600703  | 1.8307826 | #NUM!      | 2 | 4 | HNSC | 37.22  | 1.0 | 177 | 34 |
| TCGA-QK-A6II | 5.74267726 | 1.4028313 | #NUM!      | 2 | 4 | HNSC | 9.33   | 1.0 | NA  | NA |
| TCGA-CN-6998 | 6.26085557 | 0.8279003 | #NUM!      | 2 | 4 | HNSC | 11.73  | 1.0 | 65  | 9  |
| TCGA-P3-A6T6 | 4.91241035 | 1.287945  | #NUM!      | 2 | 4 | HNSC | 12.98  | 1.0 | NA  | NA |
| TCGA-CV-A6JN | 6.4918531  | 3.1154828 | #NUM!      | 2 | 4 | HNSC | 29.76  | 0.0 | NA  | NA |
| TCGA-P3-A6T4 | 5.67554498 | 2.0642276 | #NUM!      | 2 | 4 | HNSC | 2.04   | 1.0 | NA  | NA |
| TCGA-IQ-A61J | 6.76894253 | 1.2082051 | #NUM!      | 2 | 4 | HNSC | 33.54  | 0.0 | NA  | NA |
| TCGA-P3-A6T7 | 5.98621523 | 0.963844  | #NUM!      | 2 | 4 | HNSC | 16     | 1.0 | NA  | NA |
| TCGA-CN-5364 | 7.03188808 | 1.5850587 | #NUM!      | 2 | 4 | HNSC | 16.2   | 1.0 | 131 | 25 |
| TCGA-CV-7247 | 7.05803503 | 2.2506888 | -1.5568177 | 2 | 4 | HNSC | 18.96  | 1.0 | 69  | 10 |
| TCGA-CQ-A4C9 | 6.08388136 | 2.2094222 | -0.9604404 | 2 | 4 | HNSC | 23.23  | 0.0 | NA  | NA |
| TCGA-CN-6013 | 6.37401875 | 3.4543602 | -1.1306813 | 2 | 4 | HNSC | 23.88  | 1.0 | 165 | 23 |
| TCGA-CN-5374 | 6.25754059 | 1.9721412 | #NUM!      | 2 | 4 | HNSC | 56.9   | 1.0 | 149 | 18 |
| TCGA-HD-A6I0 | 4.20708853 | 1.399718  | #NUM!      | 2 | 4 | HNSC | 6.9    | 0.0 | NA  | NA |
| TCGA-IQ-A61G | 6.94809268 | 2.1878627 | #NUM!      | 2 | 4 | HNSC | 11.83  | 0.0 | NA  | NA |
| TCGA-CN-A642 | 6.53700557 | 1.893168  | -1.1068708 | 2 | 4 | HNSC | 2.69   | 1.0 | NA  | NA |
| TCGA-CV-6951 | 6.2182852  | 2.2347772 | #NUM!      | 2 | 4 | HNSC | 30.06  | 1.0 | 115 | 16 |
| TCGA-CV-7253 | 5.99410901 | 0.3365119 | #NUM!      | 2 | 4 | HNSC | 11.86  | 1.0 | 170 | 32 |
| TCGA-CN-6020 | 6.73311026 | 1.8090851 | -1.1909972 | 2 | 4 | HNSC | 6.73   | 1.0 | 125 | 23 |
| TCGA-CV-5441 | 6.254492   | 1.4907241 | #NUM!      | 2 | 4 | HNSC | 94.81  | 0.0 | 305 | 37 |
| TCGA-CV-5970 | 6.48458931 | 1.8162311 | -0.9910829 | 2 | 4 | HNSC | 13.34  | 1.0 | 167 | 39 |
| TCGA-D6-A4Z9 | 6.88580861 | 1.7273977 | #NUM!      | 2 | 4 | HNSC | 17.71  | 0.0 | NA  | NA |
| TCGA-CN-A6V6 | 6.7181561  | 1.3531539 | #NUM!      | 2 | 4 | HNSC | 20.86  | 0.0 | NA  | NA |
| TCGA-UF-A7JH | 6.93089342 | 1.3459073 | -0.9759641 | 2 | 4 | HNSC | 29.43  | 0.0 | NA  | NA |
| TCGA-CV-6954 | 5.97092496 | 1.7614555 | -1.5606428 | 2 | 4 | HNSC | 65.77  | 1.0 | 142 | 30 |
| TCGA-CN-5367 | 6.20432269 | 1.6269063 | #NUM!      | 2 | 4 | HNSC | 11.56  | 1.0 | 93  | 5  |
| TCGA-CN-A49A | 6.68904471 | 3.0583858 | #NUM!      | 2 | 4 | HNSC | 17.28  | 1.0 | NA  | NA |
| TCGA-CN-A499 | 7.0157083  | 1.9238338 | #NUM!      | 2 | 4 | HNSC | 23.55  | 0.0 | NA  | NA |
| TCGA-CQ-6229 | 6.36187712 | 2.4670708 | #NUM!      | 2 | 4 | HNSC | 99999  | 0.0 | 26  | 9  |
| TCGA-BA-7269 | 5.92803389 | 3.3896081 | #NUM!      | 2 | 4 | HNSC | 41.82  | 0.0 | 83  | 27 |
| TCGA-BA-A6DJ | 6.93099629 | 0.3771793 | #NUM!      | 2 | 4 | HNSC | 13.37  | 1.0 | NA  | NA |
| TCGA-HD-7917 | 6.99939236 | 0.7514637 | #NUM!      | 2 | 4 | HNSC | 27.46  | 1.0 | NA  | NA |
| TCGA-CV-6436 | 6.65538045 | 1.9730602 | #NUM!      | 2 | 4 | HNSC | 62.39  | 0.0 | 67  | 11 |
| TCGA-BB-A5HY | 6.73571171 | 0.4273916 | #NUM!      | 2 | 4 | HNSC | 10.55  | 1.0 | NA  | NA |
| TCGA-CV-7263 | 6.70450682 | 2.6129894 | -1.6348674 | 2 | 4 | HNSC | 99999  | 1.0 | 100 | 17 |
| TCGA-CV-7178 | 6.71856849 | 2.2134095 | -1.5937899 | 2 | 4 | HNSC | 71.16  | 1.0 | 99  | 21 |
| TCGA-CQ-6225 | 6.32909668 | 2.9814874 | -1.4779443 | 2 | 4 | HNSC | 13.24  | 1.0 | 129 | NA |
| TCGA-CV-A6K1 | 5.88952222 | 1.816272  | #NUM!      | 2 | 4 | HNSC | 22.5   | 0.0 | NA  | NA |
| TCGA-HL-7533 | 5.92237627 | 1.1890338 | #NUM!      | 2 | 4 | HNSC | 34.72  | 0.0 | NA  | NA |
| TCGA-CN-6024 | 6.37378913 | 2.2558028 | #NUM!      | 2 | 4 | HNSC | 11.07  | 1.0 | 124 | 16 |
| TCGA-F7-A50G | 6.33463263 | 2.6042374 | #NUM!      | 2 | 4 | HNSC | 99999  | 0.0 | NA  | NA |
| TCGA-QK-A6VB | 6.72428737 | 1.2324152 | #NUM!      | 2 | 4 | HNSC | 21.06  | 0.0 | NA  | NA |

|              |            |           |            |   |   |      |        |     |      |     |
|--------------|------------|-----------|------------|---|---|------|--------|-----|------|-----|
| TCGA-BB-4227 | 6.69246765 | 1.9850996 | #NUM!      | 2 | 4 | HNSC | 00000  | 0.0 | NA   | NA  |
| TCGA-CV-5977 | 7.00817984 | 0.9318343 | #NUM!      | 2 | 4 | HNSC | 60.45  | 0.0 | 69   | 13  |
| TCGA-P3-A6SX | 6.22805097 | 0.2584586 | #NUM!      | 2 | 4 | HNSC | 46.98  | 1.0 | NA   | NA  |
| TCGA-CV-6956 | 6.94963181 | 0.8585381 | #NUM!      | 2 | 4 | HNSC | 7.13   | 1.0 | 147  | 28  |
| TCGA-IQ-7632 | 6.164736   | 1.1313261 | #NUM!      | 2 | 4 | HNSC | 14.49  | 0.0 | 47   | 3   |
| TCGA-CV-A45Q | 5.03535998 | 2.372395  | #NUM!      | 2 | 4 | HNSC | 169.25 | 1.0 | NA   | NA  |
| TCGA-D6-6516 | 6.32185415 | 0.7303139 | #NUM!      | 2 | 4 | HNSC | 25.39  | 0.0 | 1414 | 193 |
| TCGA-CQ-6223 | 6.30281985 | 3.6573199 | #NUM!      | 2 | 4 | HNSC | 46.91  | 0.0 | 75   | 21  |
| TCGA-CV-A6JO | 6.86830525 | 0.5973166 | #NUM!      | 2 | 4 | HNSC | 6.47   | 1.0 | NA   | NA  |
| TCGA-F7-A623 | 5.54945663 | 3.2413368 | #NUM!      | 2 | 4 | HNSC | 99999  | 0.0 | NA   | NA  |
| TCGA-CQ-6228 | 5.76979818 | 3.0328238 | #NUM!      | 2 | 4 | HNSC | 14.98  | 1.0 | 98   | 21  |
| TCGA-D6-A6EN | 5.56369507 | 2.637703  | #NUM!      | 2 | 4 | HNSC | 22.57  | 0.0 | NA   | NA  |
| TCGA-CN-A49B | 6.92836677 | 0.458172  | #NUM!      | 2 | 4 | HNSC | 29.7   | 0.0 | NA   | NA  |
| TCGA-D6-6825 | 7.0113335  | 2.3590151 | -1.3415371 | 2 | 4 | HNSC | 16.13  | 0.0 | 59   | 10  |
| TCGA-CV-7089 | 6.43235148 | 0.2775087 | #NUM!      | 2 | 4 | HNSC | 64.78  | 1.0 | 148  | 30  |
| TCGA-CN-4741 | 5.96381395 | 5.0179709 | #NUM!      | 2 | 4 | HNSC | 73.55  | 0.0 | 146  | 39  |
| TCGA-IQ-A61H | 6.58111319 | 2.1744384 | #NUM!      | 2 | 4 | HNSC | 37.39  | 0.0 | NA   | NA  |
| TCGA-CV-7425 | 4.75838314 | 0.9254678 | #NUM!      | 2 | 4 | HNSC | 56.44  | 1.0 | NA   | 14  |
| TCGA-CV-7414 | 6.0343698  | 0.5281712 | -1.4719288 | 2 | 4 | HNSC | 0.46   | 1.0 | 223  | 57  |
| TCGA-CV-A6K2 | 6.57303969 | 1.8270873 | #NUM!      | 2 | 4 | HNSC | 10.41  | 1.0 | NA   | NA  |
| TCGA-P3-A6T5 | 6.21020766 | 1.698174  | -1.1090475 | 2 | 4 | HNSC | 28.98  | 1.0 | NA   | NA  |
| TCGA-CV-6948 | 6.54374951 | 1.7987141 | -1.6606345 | 2 | 4 | HNSC | 42.35  | 1.0 | 167  | 35  |
| TCGA-CQ-7068 | 6.58677675 | 1.0172093 | #NUM!      | 2 | 4 | HNSC | 43     | 0.0 | 90   | 24  |
| TCGA-CV-6953 | 5.93688995 | 2.5369481 | #NUM!      | 2 | 4 | HNSC | 53.91  | 1.0 | 95   | 15  |
| TCGA-T2-A6X2 | 6.64434806 | 2.252022  | #NUM!      | 2 | 4 | HNSC | 32.42  | 0.0 | NA   | NA  |
| TCGA-CQ-5323 | 6.19177187 | 2.0693241 | #NUM!      | 2 | 4 | HNSC | 48.16  | 0.0 | 61   | 8   |
| TCGA-MT-A67A | 4.40535934 | 1.0130692 | #NUM!      | 2 | 4 | HNSC | 30.03  | 0.0 | NA   | NA  |
| TCGA-CV-7099 | 7.06145652 | 0.7718011 | -1.2280299 | 2 | 4 | HNSC | 7.98   | 1.0 | 249  | 39  |
| TCGA-CV-A45V | 6.36064345 | 1.2108875 | #NUM!      | 2 | 4 | HNSC | 1.05   | 1.0 | NA   | NA  |
| TCGA-CV-7095 | 6.9045142  | 0.65764   | #NUM!      | 2 | 4 | HNSC | 18.79  | 1.0 | 205  | 32  |
| TCGA-DU-6401 | 5.8148     | 0.6753    | #NUM!      | 2 | 4 | LGG  | 87.39  | 1   | 19   | NA  |
| TCGA-DU-7294 | 5.4345     | 0.7452    | #NUM!      | 2 | 4 | LGG  | 94.25  | 0   | 19   | 6   |
| TCGA-S9-A7R3 | 6.4787     | 0.9737    | #NUM!      | 2 | 4 | LGG  | 98.98  | 0   | NA   | NA  |
| TCGA-P5-A77W | 4.3516     | 1.2362    | #NUM!      | 2 | 4 | LGG  | 19.19  | 0   | NA   | NA  |
| TCGA-DU-6408 | 6.1756     | 1.2448    | #NUM!      | 2 | 4 | LGG  | ####   | 1   | 16   | NA  |
| TCGA-VM-A8CE | 6.4235     | 1.2642    | #NUM!      | 2 | 4 | LGG  | 39.13  | 0   | NA   | NA  |
| TCGA-TQ-A7RH | 6.9803     | 1.4161    | #NUM!      | 2 | 4 | LGG  | 15.97  | 0   | NA   | NA  |
| TCGA-S9-A7IS | 6.7126     | 1.4607    | #NUM!      | 2 | 4 | LGG  | 7.92   | 1   | NA   | NA  |
| TCGA-FG-7637 | 4.7701     | 1.5044    | #NUM!      | 2 | 4 | LGG  | 40.05  | 0   | 27   | 9   |
| TCGA-TM-A84G | 3.4074     | 1.6000    | #NUM!      | 2 | 4 | LGG  | 40.60  | 0   | NA   | NA  |
| TCGA-CS-4941 | 6.7675     | 1.7869    | -1.5349    | 2 | 4 | LGG  | 7.69   | 1   | 42   | 14  |
| TCGA-DU-7018 | 5.4079     | 1.9986    | #NUM!      | 2 | 4 | LGG  | 30.65  | 1   | 29   | 15  |
| TCGA-FG-7636 | 6.6468     | 2.0924    | #NUM!      | 2 | 4 | LGG  | 17.87  | 0   | 33   | NA  |
| TCGA-P5-A5EZ | 6.2913     | 2.0949    | #NUM!      | 2 | 4 | LGG  | 2.30   | 0   | 25   | 12  |
| TCGA-CS-5393 | 6.9385     | 2.4979    | #NUM!      | 2 | 4 | LGG  | 40.14  | 0   | 21   | 7   |
| TCGA-F6-A8O3 | 3.7256     | 2.5032    | #NUM!      | 2 | 4 | LGG  | 0.23   | 0   | NA   | NA  |
| TCGA-HT-7691 | 7.0121     | 2.7170    | #NUM!      | 2 | 4 | LGG  | 0.10   | 0   | 5    | 9   |
| TCGA-FG-A4MY | 6.9132     | 2.7439    | #NUM!      | 2 | 4 | LGG  | 23.69  | 0   | 22   | 11  |
| TCGA-P5-A733 | 5.9698     | 2.7691    | #NUM!      | 2 | 4 | LGG  | 13.60  | 0   | NA   | NA  |
| TCGA-WY-A85A | 6.8397     | 2.7786    | #NUM!      | 2 | 4 | LGG  | 43.36  | 0   | NA   | NA  |
| TCGA-HT-7689 | 6.2268     | 2.8377    | -1.5547    | 2 | 4 | LGG  | 14.95  | 0   | 37   | 10  |
| TCGA-DU-6410 | 3.6891     | 2.8631    | #NUM!      | 2 | 4 | LGG  | 7.95   | 0   | 33   | 14  |
| TCGA-S9-A7J3 | 5.9003     | 2.9029    | -1.7974    | 2 | 4 | LGG  | 20.66  | 0   | NA   | NA  |
| TCGA-HT-7478 | 6.6659     | 2.9110    | #NUM!      | 2 | 4 | LGG  | 6.37   | 0   | 21   | 7   |



|              |         |         |         |   |   |      |       |   |     |    |
|--------------|---------|---------|---------|---|---|------|-------|---|-----|----|
| TCGA-DU-A76R | 5.6584  | 2.9741  | #NUM!   | 2 | 4 | LGG  | 21.29 | 1 | NA  | NA |
| TCGA-HT-7616 | 6.1464  | 2.9865  | #NUM!   | 2 | 4 | LGG  | 0.23  | 1 | 36  | 8  |
| TCGA-DU-6404 | 6.7290  | 3.0000  | #NUM!   | 2 | 4 | LGG  | ####  | 1 | 10  | 5  |
| TCGA-HT-7875 | 5.0482  | 3.0072  | #NUM!   | 2 | 4 | LGG  | 0.33  | 0 | 27  | 7  |
| TCGA-HT-A614 | 6.2487  | 3.0517  | #NUM!   | 2 | 4 | LGG  | 2.69  | 0 | 20  | 8  |
| TCGA-HW-7486 | 6.6263  | 3.1512  | #NUM!   | 2 | 4 | LGG  | 56.54 | 0 | 7   | 2  |
| TCGA-CS-6670 | 5.0059  | 3.1730  | #NUM!   | 2 | 4 | LGG  | 46.85 | 0 | NA  | NA |
| TCGA-P5-A72X | 6.2974  | 3.2371  | #NUM!   | 2 | 4 | LGG  | 13.24 | 0 | NA  | NA |
| TCGA-TM-A84F | 7.0390  | 3.3212  | #NUM!   | 2 | 4 | LGG  | 59.00 | 0 | NA  | NA |
| TCGA-E1-5305 | 7.0201  | 3.3811  | #NUM!   | 2 | 4 | LGG  | 79.93 | 1 | 23  | NA |
| TCGA-DU-8164 | 6.2495  | 3.4057  | -1.8422 | 2 | 4 | LGG  | 21.39 | 0 | 26  | 10 |
| TCGA-IK-7675 | 6.9590  | 3.4322  | #NUM!   | 2 | 4 | LGG  | 18.99 | 1 | 37  | NA |
| TCGA-DU-A7T6 | 5.0034  | 3.4831  | -1.7646 | 2 | 4 | LGG  | 17.97 | 1 | NA  | NA |
| TCGA-HT-A5RB | 5.4871  | 3.6397  | #NUM!   | 2 | 4 | LGG  | 0.10  | 0 | 14  | 8  |
| TCGA-HT-8011 | 6.3959  | 3.7171  | #NUM!   | 2 | 4 | LGG  | 16.23 | 0 | 36  | 9  |
| TCGA-DU-7006 | 6.4796  | 3.7228  | #NUM!   | 2 | 4 | LGG  | 11.47 | 1 | 47  | 9  |
| TCGA-DU-6400 | 4.8318  | 3.7752  | #NUM!   | 2 | 4 | LGG  | 1.22  | 1 | 39  | NA |
| TCGA-DB-A4XF | 5.4480  | 3.7825  | #NUM!   | 2 | 4 | LGG  | 33.54 | 0 | 19  | 8  |
| TCGA-IK-8125 | 5.3139  | 3.7960  | -1.6957 | 2 | 4 | LGG  | 42.74 | 0 | 41  | NA |
| TCGA-S9-A7R1 | 4.9094  | 3.8085  | #NUM!   | 2 | 4 | LGG  | ####  | 1 | NA  | NA |
| TCGA-HT-A4DV | 6.5607  | 4.0704  | #NUM!   | 2 | 4 | LGG  | 26.02 | 0 | 9   | NA |
| TCGA-HT-7481 | 5.8822  | 4.1118  | #NUM!   | 2 | 4 | LGG  | 95.86 | 0 | 26  | NA |
| TCGA-HT-7605 | 6.0395  | 4.3854  | #NUM!   | 2 | 4 | LGG  | 4.57  | 0 | 17  | 13 |
| TCGA-FG-A4MV | 5.7053  | 4.4134  | #NUM!   | 2 | 4 | LGG  | 18.36 | 1 | 51  | NA |
| TCGA-DU-7019 | 5.7164  | 4.5624  | #NUM!   | 2 | 4 | LGG  | 26.28 | 0 | 21  | NA |
| TCGA-DU-7302 | 5.0017  | 4.6760  | -1.5530 | 2 | 4 | LGG  | 60.25 | 0 | 27  | NA |
| TCGA-DU-A7TB | 6.8848  | 4.9067  | #NUM!   | 2 | 4 | LGG  | 51.48 | 0 | NA  | NA |
| TCGA-HT-7694 | 5.5840  | 5.1771  | #NUM!   | 2 | 4 | LGG  | 6.90  | 0 | 26  | NA |
| TCGA-DU-7300 | 5.6137  | 5.4270  | #NUM!   | 2 | 4 | LGG  | 61.96 | 1 | 37  | 23 |
| TCGA-OR-A5JQ | 7.1791  | -0.3286 | 1.9932  | 2 | 4 | ACC  | 36.24 | 0 | 16  | NA |
| TCGA-OR-A5JC | 6.5569  | -0.6527 | 1.9324  | 2 | 4 | ACC  | 57.49 | 1 | 39  | NA |
| TCGA-OR-A5LL | 5.2586  | 0.8436  | 1.8436  | 2 | 4 | ACC  | 52.99 | 1 | 60  | NA |
| TCGA-OR-A5JX | 6.6516  | -0.6246 | 1.3755  | 2 | 4 | ACC  | 31.21 | 0 | 45  | NA |
| TCGA-OR-A5K6 | 5.8841  | -0.9862 | 1.0138  | 2 | 4 | ACC  | 49.05 | 0 | 36  | NA |
| TCGA-OR-A5LR | 6.5752  | -0.2570 | 0.7430  | 2 | 4 | ACC  | 28.02 | 0 | 25  | NA |
| TCGA-OR-A5K1 | 6.5092  | -0.2721 | 0.7279  | 2 | 4 | ACC  | ####  | 0 | 36  | NA |
| TCGA-OR-A5K8 | 6.0920  | 0.5374  | 0.5374  | 2 | 4 | ACC  | 24.61 | 0 | 32  | NA |
| TCGA-OR-A5L3 | 5.3679  | 3.7434  | 0.1585  | 2 | 4 | ACC  | ####  | 0 | 34  | NA |
| TCGA-OR-A5JT | 7.2215  | -1.0776 | -0.0778 | 2 | 4 | ACC  | 29.80 | 0 | 36  | NA |
| TCGA-OR-A5JZ | 6.5239  | -0.5741 | -0.5741 | 2 | 4 | ACC  | 27.00 | 0 | 27  | NA |
| TCGA-OR-A5K4 | 6.9450  | -0.8357 | -0.8357 | 2 | 4 | ACC  | 35.55 | 0 | 223 | NA |
| TCGA-OR-A5LJ | 6.1885  | 5.7102  | -0.9902 | 2 | 4 | ACC  | 36.30 | 1 | 436 | NA |
| TCGA-OR-A5J2 | 6.8769  | 4.8575  | -1.3126 | 2 | 4 | ACC  | 55.09 | 1 | 45  | NA |
| TCGA-OR-A5LP | 6.9483  | 0.8180  | #NUM!   | 2 | 4 | ACC  | 61.01 | 0 | 29  | NA |
| TCGA-PK-A5HA | 5.0927  | 0.7258  | #NUM!   | 2 | 4 | ACC  | 39.45 | 0 | 63  | NA |
| TCGA-PK-A5H8 | 6.4699  | -0.6790 | #NUM!   | 2 | 4 | ACC  | ####  | 0 | 25  | NA |
| TCGA-EB-A44Q | 6.37281 | 5.71261 | #NUM!   | 2 | 4 | SKCM | 14    | 0 | 49  | NA |
| TCGA-D3-A2JG | 5.18632 | 3.79586 | #NUM!   | 2 | 4 | SKCM | 113   | 1 | 87  | NA |
| TCGA-D3-A51K | 6.26871 | 3.63936 | #NUM!   | 2 | 4 | SKCM | 33    | 0 | 27  | NA |
| TCGA-GN-A8LL | 5.32945 | 3.63039 | #NUM!   | 2 | 4 | SKCM | 21    | 1 | NA  | NA |
| TCGA-Z2-AA3V | 6.50612 | 3.47464 | #NUM!   | 2 | 4 | SKCM | 16    | 0 | NA  | NA |
| TCGA-D3-A8GJ | 6.96198 | 3.19645 | #NUM!   | 2 | 4 | SKCM | 241   | 0 | NA  | NA |
| TCGA-GN-A4U5 | 6.61790 | 3.18264 | #NUM!   | 2 | 4 | SKCM | 38    | 0 | 268 | NA |
| TCGA-EE-A2MH | 7.13131 | 3.13524 | #NUM!   | 2 | 4 | SKCM | 17    | 1 | 114 | NA |

|              |            |           |           |   |   |      |      |   |      |      |
|--------------|------------|-----------|-----------|---|---|------|------|---|------|------|
| TCGA-D9-A1JX | 6.93273    | 3.10284   | #NUM!     | 2 | 4 | SKCM | 7    | 1 | 162  | NA   |
| TCGA-EE-A29T | 6.68414    | 2.96532   | #NUM!     | 2 | 4 | SKCM | 370  | 0 | 318  | NA   |
| TCGA-W3-A824 | 6.98594    | 2.88754   | #NUM!     | 2 | 4 | SKCM | 228  | 0 | NA   | NA   |
| TCGA-WE-AAA3 | 7.10892    | 2.78758   | #NUM!     | 2 | 4 | SKCM | 21   | 0 | NA   | NA   |
| TCGA-EB-A6R0 | 7.05012    | 2.78540   | #NUM!     | 2 | 4 | SKCM | 20   | 1 | 311  | NA   |
| TCGA-D3-A3C1 | 6.99800    | 2.77711   | #NUM!     | 2 | 4 | SKCM | #### | 0 | 125  | NA   |
| TCGA-A5-A1OH | 7.7642     | 7.8224    | #NUM!     | 2 | 4 | UCEC | 36   | 0 | NA   | NA   |
| TCGA-EO-A3B1 | 7.7300     | 3.3808    | #NUM!     | 2 | 4 | UCEC | 27   | 0 | NA   | NA   |
| TCGA-KP-A3VZ | 7.6106     | 6.0715    | #NUM!     | 2 | 4 | UCEC | 24   | 0 | NA   | NA   |
| TCGA-4E-A92E | 7.5198     | 5.3246    | #NUM!     | 2 | 4 | UCEC | 0    | 0 | NA   | NA   |
| TCGA-EO-A3AU | 7.5122     | 3.7264    | #NUM!     | 2 | 4 | UCEC | 51   | 0 | NA   | NA   |
| TCGA-PG-A5BC | 7.4640     | 4.8464    | -1.1310   | 2 | 4 | UCEC | 23   | 0 | NA   | NA   |
| TCGA-PG-A7D5 | 7.3513     | 5.8499    | #NUM!     | 2 | 4 | UCEC | 39   | 0 | NA   | NA   |
| TCGA-EO-A3AZ | 7.3420     | 3.8485    | #NUM!     | 2 | 4 | UCEC | 27   | 0 | NA   | NA   |
| TCGA-AJ-A3EJ | 7.2513     | 4.6447    | #NUM!     | 2 | 4 | UCEC | 2    | 1 | NA   | NA   |
| TCGA-KP-A3W3 | 7.2461     | 3.7542    | #NUM!     | 2 | 4 | UCEC | 26   | 0 | NA   | NA   |
| TCGA-EY-A2OP | 7.2159     | 4.1704    | #NUM!     | 2 | 4 | UCEC | 31   | 0 | NA   | NA   |
| TCGA-2E-A9G8 | 7.1842     | 5.3115    | #NUM!     | 2 | 4 | UCEC | 41   | 0 | NA   | NA   |
| TCGA-EY-A549 | 7.1819     | 3.7506    | #NUM!     | 2 | 4 | UCEC | 20   | 0 | NA   | NA   |
| TCGA-D1-A3DG | 7.1676     | 7.9539    | #NUM!     | 2 | 4 | UCEC | 4    | 1 | NA   | NA   |
| TCGA-EO-A22X | 7.1612     | 3.7115    | #NUM!     | 2 | 4 | UCEC | 58   | 0 | NA   | NA   |
| TCGA-AJ-A2QM | 7.1118     | 3.7519    | #NUM!     | 2 | 4 | UCEC | 29   | 0 | NA   | NA   |
| TCGA-AX-A3G3 | 7.0083     | 3.5548    | #NUM!     | 2 | 4 | UCEC | 1    | 0 | NA   | NA   |
| TCGA-AP-A5FX | 6.9963     | 5.0195    | -0.5351   | 2 | 4 | UCEC | 36   | 1 | NA   | NA   |
| TCGA-BK-A13B | 6.8694     | 3.3616    | -1.0306   | 2 | 4 | UCEC | 32   | 0 | NA   | NA   |
| TCGA-AX-A05W | 6.8306     | 4.1013    | #NUM!     | 2 | 4 | UCEC | 80   | 0 | #N/A | #N/A |
| TCGA-B5-A11R | 6.5950     | 3.6786    | #NUM!     | 2 | 4 | UCEC | 77   | 0 | 551  | 58   |
| TCGA-PG-A916 | 6.5487     | 3.4210    | #NUM!     | 2 | 4 | UCEC | 17   | 0 | NA   | NA   |
| TCGA-KJ-A3U4 | 6.5368     | 5.1463    | #NUM!     | 2 | 4 | UCEC | 36   | 0 | NA   | NA   |
| TCGA-PG-A915 | 6.5029     | 3.4312    | #NUM!     | 2 | 4 | UCEC | 8    | 0 | NA   | NA   |
| TCGA-D1-A3DH | 6.4094     | 4.9421    | #NUM!     | 2 | 4 | UCEC | 19   | 0 | NA   | NA   |
| TCGA-AX-A2HH | 6.3931     | 3.1543    | #NUM!     | 2 | 4 | UCEC | 18   | 0 | NA   | NA   |
| TCGA-QF-A5YS | 6.2501     | 3.6894    | #NUM!     | 2 | 4 | UCEC | 23   | 0 | NA   | NA   |
| TCGA-EY-A3L3 | 6.1476     | 4.1009    | #NUM!     | 2 | 4 | UCEC | 27   | 0 | NA   | NA   |
| TCGA-B5-A3FA | 5.8961     | 4.8472    | #NUM!     | 2 | 4 | UCEC | 96   | 0 | NA   | NA   |
| TCGA-AJ-A3NG | 5.0173     | 3.1664    | #NUM!     | 2 | 4 | UCEC | 16   | 0 | NA   | NA   |
| TCGA-AJ-A3BI | 4.7480     | 3.6776    | #NUM!     | 2 | 4 | UCEC | 19   | 0 | NA   | NA   |
| TCGA-55-8512 | 7.90246791 | 6.862335  | 5.6434386 | 4 | 4 | LUAD | 20   | 1 | NA   | NA   |
| TCGA-55-6980 | 9.05411959 | 6.2473205 | 7.7670538 | 4 | 4 | LUAD | 69   | 0 | 17   | NA   |
| TCGA-97-A4M1 | 8.70490191 | 5.9263095 | 9.8294906 | 4 | 4 | LUAD | 20   | 0 | NA   | NA   |
| TCGA-97-8177 | 8.70025882 | 5.4103404 | 6.133084  | 4 | 4 | LUAD | 16   | 0 | NA   | NA   |
| TCGA-86-8669 | 8.70297452 | 5.2555657 | 4.0423475 | 4 | 4 | LUAD | 31   | 0 | NA   | NA   |
| TCGA-75-5146 | 8.19298061 | 4.8091633 | 3.2485606 | 4 | 4 | LUAD | 78   | 0 | 163  | 17   |
| TCGA-75-7025 | 8.05672073 | 4.8032193 | 6.980607  | 4 | 4 | LUAD | 109  | 0 | 33   | NA   |
| TCGA-86-A4P7 | 8.56895452 | 4.6800104 | 4.1159604 | 4 | 4 | LUAD | 14   | 0 | NA   | NA   |
| TCGA-O1-A52J | 8.45290434 | 4.5868074 | 8.0988618 | 4 | 4 | LUAD | 59   | 1 | NA   | NA   |
| TCGA-95-8039 | 8.37918491 | 4.556365  | 6.6961485 | 4 | 4 | LUAD | 27   | 0 | NA   | NA   |
| TCGA-MN-A4NE | 7.81518653 | 4.5494375 | 3.4966618 | 4 | 4 | LUAD | 3    | 0 | NA   | NA   |
| TCGA-97-7547 | 8.90589157 | 4.5239495 | 4.3392436 | 4 | 4 | LUAD | 65   | 0 | NA   | NA   |
| TCGA-NJ-A4YI | 8.87511461 | 4.5198432 | 8.9706711 | 4 | 4 | LUAD | 0    | 1 | NA   | NA   |
| TCGA-44-6147 | 8.8874156  | 4.4603527 | 4.2673867 | 4 | 4 | LUAD | 28   | 0 | 175  | 27   |
| TCGA-97-8552 | 8.31450435 | 4.4326247 | 8.3263294 | 4 | 4 | LUAD | 21   | 0 | NA   | NA   |
| TCGA-62-8397 | 8.95744787 | 4.2427938 | 7.986957  | 4 | 4 | LUAD | 42   | 0 | NA   | NA   |
| TCGA-97-7938 | 8.80190355 | 4.1458103 | 4.1456946 | 4 | 4 | LUAD | 1    | 1 | 331  | NA   |

|              |            |           |           |   |   |      |       |     |      |      |
|--------------|------------|-----------|-----------|---|---|------|-------|-----|------|------|
| TCGA-97-7546 | 8.70433836 | 4.1447153 | 5.6335277 | 4 | 4 | LUAD | 42    | 0   | 231  | NA   |
| TCGA-MP-A4TK | 8.67429264 | 4.0614712 | 3.6981707 | 4 | 4 | LUAD | 19    | 1   | NA   | NA   |
| TCGA-95-A4VP | 7.49268954 | 3.9489708 | 4.7963574 | 4 | 4 | LUAD | 20    | 0   | NA   | NA   |
| TCGA-91-6830 | 9.05486147 | 7.2869362 | 5.0612396 | 4 | 4 | LUAD | 2     | 0   | NA   | NA   |
| TCGA-38-4626 | 8.92855148 | 6.6464987 | 5.1061971 | 4 | 4 | LUAD | 121   | 0   | 246  | 46   |
| TCGA-05-4397 | 8.68140829 | 6.0022959 | 4.9132662 | 4 | 4 | LUAD | 24    | 1   | NA   | 139  |
| TCGA-55-5899 | 7.98907087 | 5.7747799 | 3.9432537 | 4 | 4 | LUAD | 31    | 0   | NA   | 48   |
| TCGA-91-A4BD | 9.05224342 | 5.5771678 | 7.6008925 | 4 | 4 | LUAD | 20    | 0   | NA   | NA   |
| TCGA-49-6745 | 8.92649971 | 5.4471599 | 5.5984962 | 4 | 4 | LUAD | 17    | 0   | 118  | 29   |
| TCGA-49-AARR | 8.34121916 | 5.3195822 | 4.048816  | 4 | 4 | LUAD | 164   | 0   | NA   | NA   |
| TCGA-67-3774 | 8.03000732 | 5.2670567 | 3.9730547 | 4 | 4 | LUAD | 13    | 0   | 96   | 25   |
| TCGA-38-7271 | 9.02695032 | 5.1844279 | 5.047893  | 4 | 4 | LUAD | 26    | 1   | NA   | NA   |
| TCGA-86-A4P8 | 8.98253834 | 5.0597299 | 4.4549372 | 4 | 4 | LUAD | 26    | 0   | NA   | NA   |
| TCGA-97-8172 | 8.64509025 | 4.9767715 | 5.7910238 | 4 | 4 | LUAD | 18    | 0   | NA   | NA   |
| TCGA-97-A4M6 | 8.69347281 | 4.8367861 | 5.46637   | 4 | 4 | LUAD | 19    | 0   | NA   | NA   |
| TCGA-50-5045 | 8.80798857 | 4.8317607 | 4.7441466 | 4 | 4 | LUAD | 71    | 1   | NA   | 47   |
| TCGA-05-5423 | 8.26102596 | 4.8024109 | 6.2719694 | 4 | 4 | LUAD | 5     | 0   | 138  | 27   |
| TCGA-93-A4JN | 8.48930156 | 4.7794457 | 4.7409788 | 4 | 4 | LUAD | 24    | 0   | NA   | NA   |
| TCGA-55-8514 | 7.24246008 | 4.6210631 | 4.5433319 | 4 | 4 | LUAD | 17    | 0   | NA   | NA   |
| TCGA-J2-A4AG | 8.49934811 | 4.5796955 | 5.8282269 | 4 | 4 | LUAD | 32    | 0   | NA   | NA   |
| TCGA-55-A48X | 8.46327182 | 4.5340971 | 3.4754974 | 4 | 4 | LUAD | 23    | 0   | NA   | NA   |
| TCGA-75-6206 | 8.53674571 | 4.3952808 | 3.1914474 | 4 | 4 | LUAD | 85    | 0   | NA   | 21   |
| TCGA-NJ-A4YG | 8.740081   | 4.3922054 | 4.1301385 | 4 | 4 | LUAD | 74    | 0   | #N/A | #N/A |
| TCGA-44-8120 | 8.89471053 | 4.3550755 | 4.2120346 | 4 | 4 | LUAD | 9     | 0   | NA   | NA   |
| TCGA-64-5815 | 8.52663808 | 4.3521836 | 5.0499343 | 4 | 4 | LUAD | 28    | 0   | NA   | 21   |
| TCGA-55-8207 | 8.73076541 | 4.3399697 | 4.0543406 | 4 | 4 | LUAD | 32    | 0   | NA   | NA   |
| TCGA-50-8457 | 8.2388989  | 4.3305247 | 3.9758127 | 4 | 4 | LUAD | 37    | 0   | NA   | NA   |
| TCGA-73-4662 | 8.95333794 | 4.3301869 | 7.0641062 | 4 | 4 | LUAD | 83    | 0   | 205  | 38   |
| TCGA-50-5066 | 8.24278512 | 4.3111718 | 4.5472956 | 4 | 4 | LUAD | 47    | 0   | NA   | 57   |
| TCGA-73-7498 | 8.20336274 | 4.2988035 | 7.5410896 | 4 | 4 | LUAD | 39    | 0   | 110  | NA   |
| TCGA-99-AA5R | 8.85327686 | 4.1526353 | 4.5063811 | 4 | 4 | LUAD | 22    | 0   | NA   | NA   |
| TCGA-50-5942 | 8.58446224 | 4.1246152 | 3.3233758 | 4 | 4 | LUAD | 61    | 0   | 63   | 10   |
| TCGA-91-6828 | 8.60918816 | 4.1237763 | 4.4951924 | 4 | 4 | LUAD | 11    | 0   | 286  | 60   |
| TCGA-93-A4JP | 8.26546526 | 3.9843615 | 3.8458995 | 4 | 4 | LUAD | 19    | 0   | NA   | NA   |
| TCGA-86-A456 | 8.30847223 | 3.953214  | 3.8465655 | 4 | 4 | LUAD | 29    | 0   | NA   | NA   |
| TCGA-49-AARO | 8.93647493 | 3.9461413 | 3.209851  | 4 | 4 | LUAD | 123   | 0   | NA   | NA   |
| TCGA-91-8496 | 8.50835623 | 5.4897244 | 7.8971751 | 4 | 4 | LUAD | 17    | 0   | NA   | NA   |
| TCGA-44-2661 | 8.84295052 | 5.1154715 | 5.6276168 | 4 | 4 | LUAD | 38    | 0   | 49   | 22   |
| TCGA-86-8280 | 8.84528665 | 4.6929973 | 3.5226258 | 4 | 4 | LUAD | 23    | 0   | NA   | NA   |
| TCGA-62-8395 | 8.42103596 | 4.4942146 | 3.4323729 | 4 | 4 | LUAD | 40    | 0   | NA   | NA   |
| TCGA-MP-A4SW | 8.49633583 | 4.2085126 | 3.9178499 | 4 | 4 | LUAD | 58    | 1   | NA   | NA   |
| TCGA-53-7626 | 8.73536251 | 4.1010247 | 3.3724228 | 4 | 4 | LUAD | 31    | 1   | 327  | NA   |
| TCGA-NJ-A55A | 8.53272204 | 4.0831674 | 3.6306513 | 4 | 4 | LUAD | 0     | 0   | NA   | NA   |
| TCGA-49-AAR0 | 8.34062382 | 4.0747186 | 4.0747897 | 4 | 4 | LUAD | 157   | 0   | NA   | NA   |
| TCGA-62-8399 | 6.97332381 | 3.9992676 | 3.449111  | 4 | 4 | LUAD | 89    | 0   | NA   | NA   |
| TCGA-05-4424 | 8.75073448 | 3.9606313 | 3.1563076 | 4 | 4 | LUAD | 30    | 0   | 678  | 123  |
| TCGA-IR-A3LA | #####      | #####     | #####     | 4 | 4 | CESC | ####  | 0.0 | 905  | 189  |
| TCGA-VS-A9UP | #####      | #####     | #####     | 4 | 4 | CESC | 47.44 | 0.0 | NA   | NA   |
| TCGA-FU-A3TQ | #####      | #####     | #####     | 4 | 4 | CESC | 26.12 | 0.0 | 50   | 12   |
| TCGA-VS-A9UM | #####      | #####     | #####     | 4 | 4 | CESC | 27.23 | 1.0 | NA   | NA   |
| TCGA-LP-A4AW | #####      | #####     | #####     | 4 | 4 | CESC | 0.89  | 0.0 | 83   | 19   |
| TCGA-LP-A4AX | #####      | #####     | #####     | 4 | 4 | CESC | 12.48 | 0.0 | 49   | 7    |
| TCGA-C5-A7XC | #####      | #####     | #####     | 4 | 4 | CESC | 50.95 | 0.0 | NA   | NA   |
| TCGA-JW-A5VI | #####      | #####     | #####     | 4 | 4 | CESC | 24.54 | 0.0 | 67   | 12   |

|              |        |         |        |   |   |      |       |     |      |      |
|--------------|--------|---------|--------|---|---|------|-------|-----|------|------|
| TCGA-EA-A50E | #####  | #####   | #####  | 4 | 4 | CESC | 7.46  | 1.0 | 91   | 26   |
| TCGA-VS-A8QM | #####  | #####   | #####  | 4 | 4 | CESC | 31.24 | 1.0 | NA   | NA   |
| TCGA-C5-A1M7 | #####  | #####   | #####  | 4 | 4 | CESC | 46.29 | 0.0 | 80   | 21   |
| TCGA-MY-A5BE | #####  | #####   | #####  | 4 | 4 | CESC | 35.02 | 0.0 | 40   | 11   |
| TCGA-C5-A8YT | #####  | #####   | #####  | 4 | 4 | CESC | 20.80 | 1.0 | NA   | NA   |
| TCGA-C5-A8XK | #####  | #####   | #####  | 4 | 4 | CESC | 99.84 | 0.0 | NA   | NA   |
| TCGA-VS-A8EI | #####  | #####   | #####  | 4 | 4 | CESC | 23.95 | 0.0 | NA   | NA   |
| TCGA-C5-A1BI | #####  | #####   | #####  | 4 | 4 | CESC | 36.53 | 0.0 | 89   | 19   |
| TCGA-ZJ-AAXU | #####  | #####   | #####  | 4 | 4 | CESC | 0.16  | 0.0 | NA   | NA   |
| TCGA-EA-A78R | #####  | #####   | #####  | 4 | 4 | CESC | 13.47 | 0.0 | 69   | 13   |
| TCGA-LP-A4AV | #####  | #####   | #####  | 4 | 4 | CESC | 0.00  | 0.0 | 352  | 84   |
| TCGA-IR-A3LH | #####  | #####   | #####  | 4 | 4 | CESC | 78.65 | 0.0 | 737  | 127  |
| TCGA-UC-A7PF | #####  | #####   | #####  | 4 | 4 | CESC | 93.92 | 1.0 | 337  | 64   |
| TCGA-Q1-A5R2 | #####  | #####   | #####  | 4 | 4 | CESC | 16.39 | 0.0 | 242  | 46   |
| TCGA-VS-A8QF | #####  | #####   | #####  | 4 | 4 | CESC | 59.13 | 0.0 | NA   | NA   |
| TCGA-EK-A2GZ | #####  | #####   | #####  | 4 | 4 | CESC | 12.58 | 0.0 | 65   | 15   |
| TCGA-EX-A69L | #####  | #####   | #####  | 4 | 4 | CESC | 19.78 | 0.0 | 57   | 12   |
| TCGA-VS-A94Z | #####  | #####   | #####  | 4 | 4 | CESC | 33.34 | 0.0 | NA   | NA   |
| TCGA-ZJ-AAX8 | #####  | #####   | #####  | 4 | 4 | CESC | 0.00  | 0.0 | NA   | NA   |
| TCGA-C5-A7CJ | #####  | #####   | #####  | 4 | 4 | CESC | ####  | 1.0 | 64   | 9    |
| TCGA-LP-A4AU | #####  | #####   | #####  | 4 | 4 | CESC | 11.27 | 0.0 | 27   | 5    |
| TCGA-JW-A5VJ | #####  | #####   | #####  | 4 | 4 | CESC | 21.42 | 0.0 | 162  | 35   |
| TCGA-FU-A57G | #####  | #####   | #####  | 4 | 4 | CESC | 35.41 | 0.0 | 31   | 7    |
| TCGA-EK-A2R7 | #####  | #####   | #####  | 4 | 4 | CESC | 0.89  | 0.0 | 114  | 27   |
| TCGA-ZJ-A8QR | #####  | #####   | #####  | 4 | 4 | CESC | 19.12 | 1.0 | NA   | NA   |
| TCGA-C5-A8XJ | #####  | #####   | #####  | 4 | 4 | CESC | ####  | 0.0 | NA   | NA   |
| TCGA-MA-AA41 | #####  | #####   | #####  | 4 | 4 | CESC | 9.17  | 0.0 | NA   | NA   |
| TCGA-EA-A3QD | #####  | #####   | #####  | 4 | 4 | CESC | 13.04 | 0.0 | 83   | 15   |
| TCGA-C5-A1MF | #####  | #####   | #####  | 4 | 4 | CESC | 3.58  | 0.0 | 29   | 17   |
| TCGA-C5-A1BJ | #####  | #####   | #####  | 4 | 4 | CESC | ####  | 0.0 | 193  | 29   |
| TCGA-4J-AA1J | #####  | #####   | #####  | 4 | 4 | CESC | 17.81 | 0.0 | NA   | NA   |
| TCGA-06-2567 | 6.8518 | 7.0603  | 5.4522 | 4 | 4 | GBM  | 4     | 1.0 | 38   | 8    |
| TCGA-28-5216 | 6.7831 | 3.2873  | 4.2349 | 4 | 4 | GBM  | 14    | 0.0 | 33   | 5    |
| TCGA-14-1829 | 6.8115 | 5.0996  | 3.9374 | 4 | 4 | GBM  | 7     | 0.0 | 29   | 10   |
| TCGA-06-0747 | 6.6282 | 1.4450  | 3.8142 | 4 | 4 | GBM  | 3     | 1.0 | 55   | 14   |
| TCGA-27-2526 | 6.3678 | 0.1681  | 3.7531 | 4 | 4 | GBM  | 3     | 1.0 | 40   | 13   |
| TCGA-14-0781 | 6.7813 | 4.8458  | 3.6316 | 4 | 4 | GBM  | 1     | 1.0 | 19   | 4    |
| TCGA-14-1402 | 6.4243 | 2.0903  | 3.3127 | 4 | 4 | GBM  | 32    | 1.0 | #N/A | #N/A |
| TCGA-14-1823 | 5.5626 | 0.5853  | 3.2858 | 4 | 4 | GBM  | 18    | 1.0 | 37   | 8    |
| TCGA-19-2619 | 6.4533 | 1.0541  | 3.2557 | 4 | 4 | GBM  | 10    | 0.0 | 7    | 11   |
| TCGA-28-5213 | 6.9853 | 3.0311  | 3.2535 | 4 | 4 | GBM  | 31    | 0.0 | 36   | 5    |
| TCGA-41-5651 | 6.6772 | 0.8706  | 3.0930 | 4 | 4 | GBM  | 15    | 1.0 | 64   | 14   |
| TCGA-06-5413 | 7.0918 | 5.3713  | 2.9119 | 4 | 4 | GBM  | 9     | 0.0 | 37   | 12   |
| TCGA-32-2616 | 6.6447 | -0.4424 | 2.8794 | 4 | 4 | GBM  | 7     | 1.0 | 338  | NA   |
| TCGA-06-5411 | 6.9509 | 5.1848  | 2.6883 | 4 | 4 | GBM  | 8     | 1.0 | 23   | 6    |
| TCGA-12-1597 | 5.7392 | 2.4354  | 2.2427 | 4 | 4 | GBM  | 22    | 1.0 | 16   | 17   |
| TCGA-14-0817 | 6.9555 | 2.1814  | 2.1814 | 4 | 4 | GBM  | 5     | 1.0 | 52   | 13   |
| TCGA-28-2499 | 6.8581 | 1.8137  | 2.0064 | 4 | 4 | GBM  | ####  | 0.0 | 26   | 9    |
| TCGA-27-1831 | 6.6407 | 2.0448  | 1.7229 | 4 | 4 | GBM  | 17    | 1.0 | 35   | 10   |
| TCGA-76-4931 | 6.5037 | 1.9125  | 1.7199 | 4 | 4 | GBM  | 9     | 1.0 | 11   | 3    |
| TCGA-19-1390 | 5.8631 | 0.7033  | 1.5106 | 4 | 4 | GBM  | 25    | 1.0 | 77   | 12   |
| TCGA-27-1835 | 6.9216 | 2.2291  | 1.4218 | 4 | 4 | GBM  | 21    | 1.0 | 45   | 11   |
| TCGA-06-0686 | 6.5060 | 5.1504  | 1.1504 | 4 | 4 | GBM  | 14    | 1.0 | 35   | 14   |
| TCGA-27-2523 | 6.6761 | 0.6538  | 0.9757 | 4 | 4 | GBM  | 16    | 1.0 | 34   | 14   |

|              |         |         |         |   |   |      |       |     |     |    |
|--------------|---------|---------|---------|---|---|------|-------|-----|-----|----|
| TCGA-19-2620 | 6.9283  | 2.6804  | 0.8730  | 4 | 4 | GBM  | 5     | 1.0 | 50  | 10 |
| TCGA-14-1825 | 6.9316  | 3.0637  | 0.7417  | 4 | 4 | GBM  | 8     | 1.0 | 39  | 5  |
| TCGA-A2-A0CO | 8.50733 | 5.06021 | 4.18102 | 4 | 4 | BRCA | 114.7 | 1   | 21  | NA |
| TCGA-B6-A0IH | 8.63522 | 3.99278 | 3.45354 | 4 | 4 | BRCA | 112.3 | 1   | 21  | 1  |
| TCGA-B6-A0RH | 8.62855 | 3.88635 | 2.69334 | 4 | 4 | BRCA | 212.1 | 1   | 28  | 9  |
| TCGA-AN-A0AM | 8.62510 | 7.29630 | 4.66109 | 4 | 4 | BRCA | 0.2   | 0   | 41  | 5  |
| TCGA-C8-A138 | 8.61003 | 6.50020 | 2.54823 | 4 | 4 | BRCA | 12.5  | 0   | 40  | 9  |
| TCGA-EW-A1PA | 8.18663 | 5.83611 | 4.47102 | 4 | 4 | BRCA | 18.9  | 0   | 26  | 7  |
| TCGA-Z7-A8R5 | 8.63945 | 5.75618 | 3.71114 | 4 | 4 | BRCA | 108.0 | 0   | NA  | NA |
| TCGA-A8-A08C | 7.49969 | 5.48591 | 3.63239 | 4 | 4 | BRCA | 28.9  | 0   | 3   | NA |
| TCGA-UL-AAZ6 | 8.37782 | 5.46035 | 4.97176 | 4 | 4 | BRCA | 17.0  | 0   | NA  | NA |
| TCGA-GM-A3XC | 8.64547 | 5.43389 | 3.52064 | 4 | 4 | BRCA | 43.7  | 0   | 5   | NA |
| TCGA-C8-A26X | 8.40417 | 5.32058 | 2.65374 | 4 | 4 | BRCA | 12.4  | 0   | 39  | 8  |
| TCGA-B6-A401 | 7.97512 | 5.22600 | 4.69919 | 4 | 4 | BRCA | 85.3  | 0   | 18  | NA |
| TCGA-AR-A5QP | 8.47715 | 5.01810 | 4.06192 | 4 | 4 | BRCA | 38.9  | 0   | 22  | NA |
| TCGA-BH-A42U | 8.61626 | 4.94283 | 3.91334 | 4 | 4 | BRCA | 110.5 | 0   | 11  | NA |
| TCGA-AQ-A54O | 7.22493 | 4.74657 | 5.34880 | 4 | 4 | BRCA | 32.9  | 0   | 23  | NA |
| TCGA-A7-A3J1 | 8.49305 | 4.73086 | 3.24848 | 4 | 4 | BRCA | 11.3  | 0   | 19  | NA |
| TCGA-AC-A2FG | 8.10520 | 4.54800 | 3.67864 | 4 | 4 | BRCA | 60.9  | 0   | 40  | NA |
| TCGA-AC-A3HN | 8.61841 | 4.52397 | 3.69661 | 4 | 4 | BRCA | 16.3  | 0   | 14  | NA |
| TCGA-A2-A4RY | 8.23656 | 4.48366 | 2.67787 | 4 | 4 | BRCA | 21.3  | 0   | 14  | NA |
| TCGA-D8-A4Z1 | 8.54366 | 4.48183 | 4.31018 | 4 | 4 | BRCA | 21.6  | 0   | 47  | NA |
| TCGA-E2-A1IF | 8.23885 | 4.38063 | 4.22599 | 4 | 4 | BRCA | 37.4  | 0   | 15  | 5  |
| TCGA-A7-A5ZX | 8.26853 | 4.37955 | 3.62255 | 4 | 4 | BRCA | 11.0  | 0   | 45  | NA |
| TCGA-AO-A03T | 7.44086 | 4.34118 | 3.50278 | 4 | 4 | BRCA | 69.8  | 0   | 76  | 20 |
| TCGA-AR-A2LN | 8.48998 | 4.32412 | 3.12880 | 4 | 4 | BRCA | 38.1  | 0   | 27  | NA |
| TCGA-A7-A13H | 8.57119 | 4.26718 | 2.79107 | 4 | 4 | BRCA | 29.5  | 0   | 22  | NA |
| TCGA-OL-A5RX | 8.52027 | 4.24856 | 2.80799 | 4 | 4 | BRCA | 28.8  | 0   | 22  | NA |
| TCGA-A7-A425 | 8.11331 | 4.24375 | 5.83978 | 4 | 4 | BRCA | 14.7  | 0   | 35  | NA |
| TCGA-OL-A66P | 8.20836 | 4.19896 | 4.40208 | 4 | 4 | BRCA | 14.1  | 0   | NA  | NA |
| TCGA-A2-A1G6 | 8.60466 | 4.11699 | 2.52772 | 4 | 4 | BRCA | 16.5  | 0   | 4   | 0  |
| TCGA-E2-A14U | 8.26779 | 4.04452 | 4.19132 | 4 | 4 | BRCA | 43.3  | 0   | 11  | NA |
| TCGA-W8-A86G | 7.79191 | 4.04092 | 3.45230 | 4 | 4 | BRCA | 11.4  | 0   | NA  | NA |
| TCGA-E9-A1NH | 8.38833 | 4.00668 | 3.00484 | 4 | 4 | BRCA | 18.9  | 0   | 18  | 6  |
| TCGA-D8-A27G | 8.01528 | 3.94582 | 3.48248 | 4 | 4 | BRCA | 13.4  | 0   | 749 | NA |
| TCGA-LD-A66U | 7.86022 | 3.90785 | 5.44853 | 4 | 4 | BRCA | 21.2  | 0   | NA  | NA |
| TCGA-AR-A1AL | 8.17758 | 3.86587 | 3.61276 | 4 | 4 | BRCA | 97.6  | 0   | 19  | 6  |
| TCGA-E9-A5UP | 7.50302 | 3.85141 | 5.10296 | 4 | 4 | BRCA | 26.4  | 0   | 24  | NA |
| TCGA-A7-A426 | 8.06218 | 3.84377 | 4.10370 | 4 | 4 | BRCA | 12.0  | 0   | 28  | NA |
| TCGA-A2-A3XW | 8.09590 | 3.81052 | 5.98017 | 4 | 4 | BRCA | 56.2  | 0   | 4   | NA |
| TCGA-LL-A9Q3 | 8.54536 | 3.80328 | 4.58358 | 4 | 4 | BRCA | 17.5  | 0   | NA  | NA |
| TCGA-OL-A5DA | 7.60329 | 3.74958 | 3.85419 | 4 | 4 | BRCA | 58.6  | 0   | 43  | NA |
| TCGA-A2-A1G0 | 8.31657 | 3.70263 | 3.62034 | 4 | 4 | BRCA | 20.2  | 0   | 20  | 3  |
| TCGA-E9-A6HE | 8.07565 | 3.70190 | 3.11445 | 4 | 4 | BRCA | 27.8  | 0   | NA  | NA |
| TCGA-D8-A73X | 8.04479 | 3.70173 | 4.12747 | 4 | 4 | BRCA | 25.2  | 0   | NA  | NA |
| TCGA-BH-A2L8 | 8.35193 | 3.69870 | 3.70319 | 4 | 4 | BRCA | 20.1  | 0   | 307 | NA |
| TCGA-AR-A2LM | 8.33031 | 3.64826 | 2.55913 | 4 | 4 | BRCA | 63.6  | 0   | 11  | NA |
| TCGA-D8-A27I | 8.62774 | 3.62427 | 2.77973 | 4 | 4 | BRCA | 14.4  | 0   | 27  | 3  |
| TCGA-E9-A1QZ | 8.34163 | 3.59192 | 2.91920 | 4 | 4 | BRCA | 24.8  | 0   | 8   | 4  |
| TCGA-A8-A06T | 7.50957 | 3.55758 | 3.18279 | 4 | 4 | BRCA | 53.0  | 0   | 22  | 6  |
| TCGA-A2-A4RX | 8.47592 | 3.54920 | 2.86255 | 4 | 4 | BRCA | 24.4  | 0   | 14  | NA |
| TCGA-OL-A5RV | 8.18311 | 3.52398 | 2.74688 | 4 | 4 | BRCA | 34.9  | 0   | 12  | NA |
| TCGA-A2-A3KC | 8.30966 | 3.50738 | 3.81625 | 4 | 4 | BRCA | 36.2  | 0   | 25  | NA |
| TCGA-GM-A3XN | 8.62723 | 3.49194 | 3.60133 | 4 | 4 | BRCA | 66.3  | 0   | 15  | NA |

|              |            |           |            |   |   |      |       |     |     |    |
|--------------|------------|-----------|------------|---|---|------|-------|-----|-----|----|
| TCGA-OL-A66J | 8.19896    | 3.46819   | 5.38073    | 4 | 4 | BRCA | 65.6  | 0   | 47  | NA |
| TCGA-B6-A0RV | 8.15144    | 3.45900   | 3.93641    | 4 | 4 | BRCA | 169.4 | 0   | 27  | 11 |
| TCGA-A7-A26H | 8.34322    | 3.45600   | 3.71621    | 4 | 4 | BRCA | 23.8  | 0   | 76  | 19 |
| TCGA-E9-A1RG | 7.56209    | 3.44239   | 2.59357    | 4 | 4 | BRCA | 21.2  | 0   | 31  | 4  |
| TCGA-LL-A7SZ | 8.48017    | 3.44186   | 3.61258    | 4 | 4 | BRCA | 19.5  | 0   | NA  | NA |
| TCGA-B6-A408 | 8.54399    | 3.42938   | 2.62366    | 4 | 4 | BRCA | 68.1  | 0   | 30  | NA |
| TCGA-MS-A51U | 8.68090    | 3.42552   | 3.24642    | 4 | 4 | BRCA | 22.4  | 0   | 11  | NA |
| TCGA-OL-A5RU | 8.24738    | 3.42143   | 3.79454    | 4 | 4 | BRCA | 40.0  | 0   | 22  | NA |
| TCGA-A2-A0CK | 8.17128    | 3.41561   | 4.41864    | 4 | 4 | BRCA | 136.6 | 0   | 14  | NA |
| TCGA-E9-A3X8 | 8.34009    | 3.39569   | 4.66671    | 4 | 4 | BRCA | 30.4  | 0   | 13  | NA |
| TCGA-OL-A5D8 | 7.11307    | 3.39184   | 5.99362    | 4 | 4 | BRCA | 32.0  | 0   | 27  | NA |
| TCGA-AC-A3W7 | 8.60582    | 3.38075   | 4.12076    | 4 | 4 | BRCA | 15.5  | 0   | 56  | NA |
| TCGA-A2-A0SY | 8.61825    | 3.35802   | 2.70702    | 4 | 4 | BRCA | 44.2  | 0   | 97  | 23 |
| TCGA-L5-A88T | 10.0140529 | 3.8316106 | 5.1219198  | 4 | 4 | ESCA | 22.8  | 0   | 80  | NA |
| TCGA-L5-A88S | 9.12159848 | 5.5906516 | 6.9127834  | 4 | 4 | ESCA | 15.5  | 0   | 81  | NA |
| TCGA-L5-A88Y | 11.0945915 | 4.4180252 | 2.7516746  | 4 | 4 | ESCA | 0.36  | 0   | 204 | NA |
| TCGA-JY-A938 | 11.2704605 | 3.8186474 | 1.0129343  | 4 | 4 | ESCA | 34.8  | 0   | 128 | NA |
| TCGA-LN-A49W | 9.07388099 | 4.6173639 | 1.9119882  | 4 | 4 | ESCA | 13.2  | 0   | 78  | NA |
| TCGA-L5-A8NQ | 8.85293448 | 3.9782892 | 3.2202376  | 4 | 4 | ESCA | 21.4  | 1   | 221 | NA |
| TCGA-ZR-A9CJ | 10.022533  | 5.3563247 | 4.0664651  | 4 | 4 | ESCA | 19.7  | 1   | 128 | NA |
| TCGA-VR-A8Q7 | 9.04569515 | 4.1243495 | 4.3216353  | 4 | 4 | ESCA | 52.2  | 0   | 78  | NA |
| TCGA-LN-A9FP | 8.91577858 | 4.7622954 | 6.3770956  | 4 | 4 | ESCA | 12    | 0   | 420 | NA |
| TCGA-R6-A6DN | 8.79468362 | 6.9790215 | 2.3870768  | 4 | 4 | ESCA | 7.98  | 1   | 90  | NA |
| TCGA-JY-A6FE | 9.23021271 | 5.0326928 | 3.9314696  | 4 | 4 | ESCA | 3.68  | 1   | 59  | NA |
| TCGA-L5-A4OO | 10.669051  | 3.7345187 | 3.1097822  | 4 | 4 | ESCA | 3.32  | 0   | 94  | NA |
| TCGA-LN-A49P | 8.77396363 | 3.7377086 | 2.0478481  | 4 | 4 | ESCA | 12.3  | 0   | 69  | NA |
| TCGA-IG-A5S3 | 8.70051014 | 3.7375408 | 2.735719   | 4 | 4 | ESCA | 23.4  | 0   | 65  | NA |
| TCGA-2H-A9GG | 10.5367302 | 4.7042304 | 1.6769854  | 4 | 4 | ESCA | 20    | 1   | NA  | NA |
| TCGA-VR-A8ET | 8.40995935 | 3.8534856 | 0.938496   | 4 | 4 | ESCA | 1.54  | 1   | 23  | NA |
| TCGA-IG-A51D | 8.60226006 | 3.9056898 | 0.8909258  | 4 | 4 | ESCA | 17    | 0   | 140 | NA |
| TCGA-IG-A3YC | 8.92164209 | 4.0950486 | 3.3854655  | 4 | 4 | ESCA | 20.1  | 0   | 51  | NA |
| TCGA-LN-A4A3 | 7.7795043  | 4.4835522 | 1.6853043  | 4 | 4 | ESCA | 12.8  | 0   | 67  | NA |
| TCGA-IG-A3YA | 9.66354673 | 3.7886051 | 2.7857526  | 4 | 4 | ESCA | 20.8  | 0   | 81  | NA |
| TCGA-Z6-A8JD | 9.55200523 | 4.8893518 | 1.7378273  | 4 | 4 | ESCA | 3.42  | 0   | 191 | NA |
| TCGA-VR-A8EU | 8.46332484 | 3.8333187 | 1.8513001  | 4 | 4 | ESCA | 18.3  | 1   | 86  | NA |
| TCGA-IG-A7DP | 11.0701054 | 4.6666438 | 2.0393565  | 4 | 4 | ESCA | 14.9  | 0   | 19  | NA |
| TCGA-LN-A9FO | 7.34735512 | 6.5284882 | 5.5626919  | 4 | 4 | ESCA | 0.13  | 0   | 96  | NA |
| TCGA-IG-A5B8 | 7.86148238 | 6.0965247 | 1.8801071  | 4 | 4 | ESCA | 0.79  | 1   | 231 | NA |
| TCGA-CQ-A4CA | 6.49223776 | 2.587269  | -0.7345631 | 4 | 4 | HNSC | 0.0   | 0   | NA  | NA |
| TCGA-H7-A6C4 | 6.88070144 | 3.3446439 | 1.3446581  | 4 | 4 | HNSC | 1.0   | 0   | NA  | NA |
| TCGA-KU-A6H8 | 6.62763748 | 4.3330158 | 4.5809414  | 4 | 4 | HNSC | 10.74 | 1.0 | NA  | NA |
| TCGA-CV-6959 | 7.04602388 | 2.3771515 | -0.0378582 | 4 | 4 | HNSC | 8.41  | 1.0 | 54  | 8  |
| TCGA-CQ-6219 | 6.92720432 | 2.587365  | 0.1723595  | 4 | 4 | HNSC | 15.74 | 1.0 | NA  | 16 |
| TCGA-P3-A6SW | 6.59074422 | 1.3239465 | 0.3240041  | 4 | 4 | HNSC | 36.79 | 0.0 | NA  | NA |
| TCGA-UF-A71B | 6.45359659 | 1.7720546 | 0.7720546  | 4 | 4 | HNSC | 49.47 | 0.0 | NA  | NA |
| TCGA-MT-A51V | 6.18592401 | 2.2162996 | -0.9537185 | 4 | 4 | HNSC | 14.36 | 0.0 | NA  | NA |
| TCGA-BB-4224 | 4.42428388 | 2.1956311 | -0.1262655 | 4 | 4 | HNSC | 00000 | 0.0 | 73  | 11 |
| TCGA-CX-7086 | 5.34949975 | 1.7120675 | 1.127105   | 4 | 4 | HNSC | 18.82 | 0.0 | 197 | 20 |
| TCGA-CR-7368 | 5.9835067  | 0.8202402 | -0.1796781 | 4 | 4 | HNSC | 40.9  | 0.0 | 178 | 45 |
| TCGA-MT-A67D | 6.68712369 | 1.7287477 | 0.5063988  | 4 | 4 | HNSC | 1.84  | 0.0 | NA  | NA |
| TCGA-CR-7389 | 6.99164995 | 1.5515406 | 1.5515406  | 4 | 4 | HNSC | 12.88 | 0.0 | 97  | 20 |
| TCGA-TN-A7HI | 6.93445281 | 1.4641455 | -0.1207648 | 4 | 4 | HNSC | 13.53 | 0.0 | NA  | NA |
| TCGA-CR-6471 | 6.7982696  | 0.6438562 | 0.9657658  | 4 | 4 | HNSC | 39.49 | 1.0 | 117 | 17 |
| TCGA-CR-7369 | 6.71173029 | 0.4551233 | -0.5447714 | 4 | 4 | HNSC | 35.81 | 1.0 | 67  | 14 |

|              |            |           |            |   |   |      |        |     |     |     |
|--------------|------------|-----------|------------|---|---|------|--------|-----|-----|-----|
| TCGA-CQ-5324 | 5.89181529 | 0.7085846 | -0.8764662 | 4 | 4 | HNSC | 52.33  | 0.0 | 63  | 11  |
| TCGA-MT-A67F | 6.71180324 | 2.3203403 | 0.1504297  | 4 | 4 | HNSC | 12.61  | 0.0 | NA  | NA  |
| TCGA-QK-A652 | 6.67157928 | 2.9202361 | 0.9942176  | 4 | 4 | HNSC | 21.19  | 0.0 | NA  | NA  |
| TCGA-CV-5430 | 6.95996485 | 0.5924451 | 0.5924451  | 4 | 4 | HNSC | 139.32 | 0.0 | 131 | 32  |
| TCGA-CV-6961 | 6.82081335 | 6.2364792 | 0.2141248  | 4 | 4 | HNSC | 2.5    | 1.0 | 479 | 127 |
| TCGA-CV-A6JU | 6.18033288 | 4.3631991 | 0.5558162  | 4 | 4 | HNSC | 3.61   | 0.0 | NA  | NA  |
| TCGA-CN-4722 | 6.43036557 | 0.516116  | -0.0688465 | 4 | 4 | HNSC | 48.72  | 0.0 | NA  | NA  |
| TCGA-HD-8224 | 6.08540553 | 3.5623401 | 0.2403754  | 4 | 4 | HNSC | 14.65  | 1.0 | NA  | NA  |
| TCGA-CQ-6222 | 6.92541795 | 4.817613  | 1.2815499  | 4 | 4 | HNSC | 66.23  | 0.0 | NA  | 16  |
| TCGA-CN-6021 | 6.17932393 | 1.7198844 | 0.9125732  | 4 | 4 | HNSC | 9.07   | 1.0 | 243 | 38  |
| TCGA-CR-7401 | 7.02320766 | 1.5583166 | 0.5583656  | 4 | 4 | HNSC | 00000  | 0.0 | 70  | 12  |
| TCGA-CV-A6JT | 6.94418261 | 1.5012608 | -0.4987902 | 4 | 4 | HNSC | 27.99  | 0.0 | NA  | NA  |
| TCGA-CV-6962 | 6.91297793 | 2.5655241 | -0.2417821 | 4 | 4 | HNSC | 99999  | 1.0 | 138 | 29  |
| TCGA-UF-A7JA | 6.82968088 | 3.415042  | 0.4150014  | 4 | 4 | HNSC | 74.41  | 0.0 | NA  | NA  |
| TCGA-D6-A6EK | 5.74427952 | 0.886277  | 0.886277   | 4 | 4 | HNSC | 28.75  | 0.0 | NA  | NA  |
| TCGA-CV-6936 | 4.63023072 | 0.6123053 | -0.7095756 | 4 | 4 | HNSC | 5.45   | 1.0 | 228 | 49  |
| TCGA-CV-A6JY | 4.98802567 | 0.9880484 | -0.5968414 | 4 | 4 | HNSC | 21.22  | 0.0 | NA  | NA  |
| TCGA-BA-A6DE | 6.87278567 | 1.3181722 | -0.4892406 | 4 | 4 | HNSC | 14.45  | 0.0 | NA  | NA  |
| TCGA-CV-6937 | 6.66817445 | 4.0088006 | 0.3649086  | 4 | 4 | HNSC | 20.5   | 1.0 | 116 | 21  |
| TCGA-CN-4739 | 6.97581817 | 1.6751385 | -0.4947188 | 4 | 4 | HNSC | 45.8   | 1.0 | 176 | 44  |
| TCGA-BA-5151 | 6.27859999 | 1.6790184 | 0.0941009  | 4 | 4 | HNSC | 23.72  | 0.0 | 73  | 14  |
| TCGA-UF-A7JT | 7.04003432 | 2.5994606 | -0.2078943 | 4 | 4 | HNSC | 99999  | 1.0 | NA  | NA  |
| TCGA-C9-A47Z | 5.22309041 | 0.7636665 | -0.821381  | 4 | 4 | HNSC | 6.27   | 1.0 | NA  | NA  |
| TCGA-CQ-5333 | 6.54783229 | 3.8754066 | 1.6123525  | 4 | 4 | HNSC | 11.2   | 1.0 | NA  | NA  |
| TCGA-CQ-7067 | 6.68770041 | 1.7953514 | 0.7953514  | 4 | 4 | HNSC | 16.72  | 0.0 | NA  | NA  |
| TCGA-CQ-A4CE | 6.15431384 | 2.5104556 | -0.8114725 | 4 | 4 | HNSC | 29.47  | 0.0 | NA  | NA  |
| TCGA-CV-7421 | 6.60313374 | 1.1703097 | 0.1703097  | 4 | 4 | HNSC | 00000  | 1.0 | 51  | 7   |
| TCGA-CR-6492 | 6.83510298 | 1.6651653 | -0.5047142 | 4 | 4 | HNSC | 15.74  | 0.0 | 59  | 13  |
| TCGA-CX-7082 | 6.88215147 | 1.5687131 | -0.6012119 | 4 | 4 | HNSC | 0.36   | 1.0 | 84  | 19  |
| TCGA-CV-A45P | 5.50889131 | 1.1165644 | -0.8833691 | 4 | 4 | HNSC | 20.99  | 0.0 | NA  | NA  |
| TCGA-CV-A6JM | 6.88279465 | 2.0499095 | 1.0499095  | 4 | 4 | HNSC | 6.37   | 1.0 | NA  | NA  |
| TCGA-E1-A7YE | 5.7165     | 0.6897    | -0.0472    | 4 | 4 | LGG  | 29.11  | 1   | NA  | NA  |
| TCGA-DU-A7TJ | 7.0593     | 0.6995    | 1.5474     | 4 | 4 | LGG  | 0.56   | 0   | NA  | NA  |
| TCGA-DH-A669 | 5.2228     | 0.7204    | 2.7792     | 4 | 4 | LGG  | 30.19  | 1   | NA  | NA  |
| TCGA-CS-4938 | 6.5478     | 0.7469    | -1.2529    | 4 | 4 | LGG  | ####   | 0   | 13  | 3   |
| TCGA-HW-7490 | 6.9929     | 0.7546    | 0.7546     | 4 | 4 | LGG  | 45.57  | 0   | 31  | 6   |
| TCGA-E1-5322 | 6.7532     | 0.7951    | -0.7899    | 4 | 4 | LGG  | ####   | 1   | 18  | NA  |
| TCGA-HT-7677 | 6.5947     | 0.8060    | 0.5429     | 4 | 4 | LGG  | 16.23  | 0   | 25  | 8   |
| TCGA-S9-A6WE | 6.1774     | 0.8466    | -1.1536    | 4 | 4 | LGG  | ####   | 0   | NA  | NA  |
| TCGA-TQ-A7RF | 4.9606     | 0.8521    | 1.6594     | 4 | 4 | LGG  | 21.35  | 0   | NA  | NA  |
| TCGA-DU-6397 | 6.0552     | 0.9126    | 0.9126     | 4 | 4 | LGG  | 46.02  | 1   | 21  | 6   |
| TCGA-S9-A6TU | 7.0042     | 0.9220    | 0.5070     | 4 | 4 | LGG  | 87.06  | 0   | NA  | NA  |
| TCGA-S9-A89Z | 7.0862     | 0.9365    | 2.1064     | 4 | 4 | LGG  | 20.47  | 0   | NA  | NA  |
| TCGA-RY-A83X | 5.6706     | 0.9982    | 1.7352     | 4 | 4 | LGG  | 30.85  | 0   | NA  | NA  |
| TCGA-FG-A6J1 | 6.3154     | 1.0116    | 1.0116     | 4 | 4 | LGG  | 16.43  | 0   | NA  | NA  |
| TCGA-CS-6666 | 5.4255     | 1.0482    | -0.2737    | 4 | 4 | LGG  | 46.91  | 0   | 24  | 7   |
| TCGA-TM-A84M | 2.4272     | 1.0487    | 1.3117     | 4 | 4 | LGG  | 24.77  | 0   | NA  | NA  |
| TCGA-QH-A6X3 | 5.0384     | 1.0936    | 0.3566     | 4 | 4 | LGG  | 10.28  | 0   | NA  | NA  |
| TCGA-DU-7299 | 6.9929     | 1.0989    | -0.3162    | 4 | 4 | LGG  | 43.99  | 1   | 22  | NA  |
| TCGA-TM-A84C | 6.4650     | 1.1890    | 2.9545     | 4 | 4 | LGG  | 33.21  | 1   | NA  | NA  |
| TCGA-VW-A8FI | 6.7371     | 1.2533    | -0.7469    | 4 | 4 | LGG  | 8.05   | 1   | NA  | NA  |
| TCGA-QH-A6X5 | 6.2410     | 1.2595    | 0.5226     | 4 | 4 | LGG  | 16.33  | 0   | NA  | NA  |
| TCGA-TM-A84Q | 5.8848     | 1.2828    | 1.7973     | 4 | 4 | LGG  | 25.36  | 0   | NA  | NA  |
| TCGA-DU-6395 | 6.7456     | 1.2908    | 1.4835     | 4 | 4 | LGG  | 48.98  | 1   | 19  | 10  |

|              |        |        |         |   |   |     |       |   |    |    |
|--------------|--------|--------|---------|---|---|-----|-------|---|----|----|
| TCGA-CS-6667 | 5.5348 | 1.3107 | -1.4965 | 4 | 4 | LGG | 48.26 | 0 | 19 | 3  |
| TCGA-FG-A70Y | 6.7656 | 1.3292 | -1.2557 | 4 | 4 | LGG | 28.52 | 0 | NA | NA |
| TCGA-CS-4944 | 5.1210 | 1.3345 | 0.0125  | 4 | 4 | LGG | 60.05 | 0 | 19 | 6  |
| TCGA-E1-A7YS | 3.1308 | 1.3532 | 0.1308  | 4 | 4 | LGG | 15.31 | 1 | NA | NA |
| TCGA-E1-5307 | 5.9418 | 1.3655 | 0.1431  | 4 | 4 | LGG | 57.88 | 1 | 52 | NA |
| TCGA-DB-A4X9 | 6.6611 | 1.3831 | 0.0612  | 4 | 4 | LGG | 46.39 | 0 | 22 | 7  |
| TCGA-TM-A7C3 | 6.4653 | 1.4067 | 0.8218  | 4 | 4 | LGG | 54.73 | 1 | NA | NA |
| TCGA-DB-A64U | 5.8937 | 1.4250 | 0.6176  | 4 | 4 | LGG | 27.79 | 0 | 6  | 1  |
| TCGA-R8-A73M | 4.4802 | 1.4446 | 1.1227  | 4 | 4 | LGG | 59.33 | 0 | NA | NA |
| TCGA-DU-A5TR | 6.7835 | 1.4707 | 2.6082  | 4 | 4 | LGG | 29.83 | 0 | 33 | NA |
| TCGA-HT-7608 | 5.7401 | 1.4826 | -0.3246 | 4 | 4 | LGG | 22.04 | 0 | 13 | 13 |
| TCGA-VM-A8CE | 7.0051 | 1.5079 | -0.0770 | 4 | 4 | LGG | 0.10  | 0 | NA | NA |
| TCGA-P5-A730 | 5.9210 | 1.5118 | -1.0731 | 4 | 4 | LGG | 10.94 | 0 | NA | NA |
| TCGA-HT-A74O | 6.7343 | 1.5195 | 2.6350  | 4 | 4 | LGG | 0.10  | 0 | NA | NA |
| TCGA-TM-A84L | 6.7670 | 1.5318 | 0.5319  | 4 | 4 | LGG | 40.80 | 1 | NA | NA |
| TCGA-DB-5273 | 6.1804 | 1.5366 | 0.3142  | 4 | 4 | LGG | 81.90 | 0 | 11 | 5  |
| TCGA-R8-A6ML | 4.4796 | 1.5726 | 0.1576  | 4 | 4 | LGG | 93.96 | 0 | NA | NA |
| TCGA-FG-A6IZ | 4.6219 | 1.5964 | 3.3125  | 4 | 4 | LGG | 15.01 | 0 | NA | NA |
| TCGA-RY-A83Y | 4.7020 | 1.6431 | 1.0581  | 4 | 4 | LGG | 5.45  | 0 | NA | NA |
| TCGA-DB-A75K | 5.6743 | 1.6520 | 0.9739  | 4 | 4 | LGG | 12.09 | 0 | NA | NA |
| TCGA-HT-8114 | 6.0785 | 1.6973 | -0.5251 | 4 | 4 | LGG | 34.17 | 0 | 12 | 1  |
| TCGA-S9-A6TX | 5.6422 | 1.7125 | 1.0344  | 4 | 4 | LGG | 40.90 | 0 | NA | NA |
| TCGA-DU-A5TP | 6.6580 | 1.7155 | -0.2845 | 4 | 4 | LGG | 33.25 | 0 | 20 | 8  |
| TCGA-DB-A64R | 4.0838 | 1.7619 | -1.0454 | 4 | 4 | LGG | 31.37 | 0 | 13 | 8  |
| TCGA-KT-A74X | 6.0445 | 1.7840 | 0.7840  | 4 | 4 | LGG | 14.39 | 0 | NA | NA |
| TCGA-E1-5319 | 5.7062 | 1.8538 | -1.3162 | 4 | 4 | LGG | 95.50 | 1 | 29 | NA |
| TCGA-S9-A7IY | 6.7925 | 1.9037 | 0.4887  | 4 | 4 | LGG | 23.49 | 0 | NA | NA |
| TCGA-S9-A6TW | 5.7953 | 1.9752 | -0.0249 | 4 | 4 | LGG | 41.06 | 0 | NA | NA |
| TCGA-TQ-A7RC | 6.9718 | 2.0259 | 0.4410  | 4 | 4 | LGG | 31.18 | 0 | NA | NA |
| TCGA-TM-A84S | 5.1986 | 2.0286 | 0.4437  | 4 | 4 | LGG | 14.91 | 0 | NA | NA |
| TCGA-DU-8166 | 5.5229 | 2.0443 | -0.6561 | 4 | 4 | LGG | 16.95 | 0 | 20 | NA |
| TCGA-EZ-7264 | 4.1159 | 2.0686 | 0.1617  | 4 | 4 | LGG | 39.45 | 0 | 18 | NA |
| TCGA-DB-A64P | 4.9979 | 2.0746 | -1.2474 | 4 | 4 | LGG | 30.09 | 0 | 21 | NA |
| TCGA-HT-7602 | 6.4521 | 2.0913 | -0.2306 | 4 | 4 | LGG | 29.83 | 0 | 9  | 4  |
| TCGA-HT-8012 | 5.0076 | 2.1293 | 0.6439  | 4 | 4 | LGG | 9.40  | 0 | 15 | 6  |
| TCGA-CS-5390 | 5.5352 | 2.1315 | -0.4534 | 4 | 4 | LGG | ####  | 1 | 27 | 7  |
| TCGA-DU-A6S8 | 4.5114 | 2.1329 | -1.1890 | 4 | 4 | LGG | 22.27 | 0 | NA | NA |
| TCGA-R8-A6MK | 6.4295 | 2.1341 | -0.3254 | 4 | 4 | LGG | 88.76 | 0 | NA | NA |
| TCGA-P5-A737 | 4.5595 | 2.1502 | 0.5653  | 4 | 4 | LGG | 12.22 | 0 | NA | NA |
| TCGA-P5-A781 | 5.4109 | 2.1561 | -0.3033 | 4 | 4 | LGG | 4.40  | 0 | NA | NA |
| TCGA-TM-A7C5 | 4.7295 | 2.2059 | -0.7941 | 4 | 4 | LGG | 49.28 | 0 | NA | NA |
| TCGA-DU-A7T8 | 5.7355 | 2.2265 | 2.4329  | 4 | 4 | LGG | ####  | 1 | NA | NA |
| TCGA-DU-6542 | 7.0823 | 2.2719 | -1.3129 | 4 | 4 | LGG | 2.40  | 0 | 16 | NA |
| TCGA-FG-A87Q | 6.9762 | 2.3169 | 2.8023  | 4 | 4 | LGG | 5.72  | 0 | NA | NA |
| TCGA-QH-A6CL | 6.1656 | 2.3243 | -0.8455 | 4 | 4 | LGG | 14.82 | 0 | NA | NA |
| TCGA-E1-A7YU | 6.4818 | 2.3866 | 1.5122  | 4 | 4 | LGG | 0.76  | 1 | NA | NA |
| TCGA-QH-A65Z | 4.6139 | 2.3915 | -0.1935 | 4 | 4 | LGG | 14.03 | 0 | 22 | NA |
| TCGA-DH-5141 | 5.2186 | 2.3966 | 0.1742  | 4 | 4 | LGG | 31.80 | 0 | 21 | NA |
| TCGA-QH-A65X | 5.0543 | 2.3990 | 0.6620  | 4 | 4 | LGG | 15.83 | 0 | NA | NA |
| TCGA-HT-7858 | 6.2764 | 2.4255 | 0.2031  | 4 | 4 | LGG | 50.59 | 0 | 11 | 3  |
| TCGA-HT-A615 | 7.1249 | 2.4635 | 0.3480  | 4 | 4 | LGG | 16.92 | 0 | 29 | 13 |
| TCGA-HT-7884 | 7.0664 | 2.4673 | -1.4395 | 4 | 4 | LGG | 11.27 | 0 | 27 | 6  |
| TCGA-P5-A5ET | 5.1687 | 2.4682 | -0.3392 | 4 | 4 | LGG | 0.00  | 0 | 20 | 6  |
| TCGA-S9-A6WH | 3.9054 | 2.5069 | -0.9526 | 4 | 4 | LGG | 38.53 | 0 | NA | NA |



|              |        |        |         |   |   |     |       |   |    |    |
|--------------|--------|--------|---------|---|---|-----|-------|---|----|----|
| TCGA-DU-7014 | 6.4988 | 2.5431 | -0.7049 | 4 | 4 | LGG | ####  | 1 | NA | NA |
| TCGA-DU-A5TT | 7.1243 | 2.5962 | 0.3738  | 4 | 4 | LGG | 24.41 | 0 | 40 | 9  |
| TCGA-DB-A4XA | 5.3297 | 2.6026 | 0.1433  | 4 | 4 | LGG | 18.82 | 0 | 8  | 3  |
| TCGA-FG-A711 | 7.0437 | 2.6183 | -0.1890 | 4 | 4 | LGG | 48.65 | 1 | NA | NA |
| TCGA-S9-A6U2 | 5.5646 | 2.6211 | -0.0793 | 4 | 4 | LGG | 29.83 | 0 | NA | NA |
| TCGA-DH-5143 | 6.2240 | 2.6681 | -1.4193 | 4 | 4 | LGG | 46.02 | 0 | 23 | NA |
| TCGA-RY-A847 | 5.8238 | 2.6925 | -1.0078 | 4 | 4 | LGG | 30.65 | 0 | NA | NA |
| TCGA-TQ-A7RJ | 6.2723 | 2.7075 | 0.8595  | 4 | 4 | LGG | 40.37 | 0 | NA | NA |
| TCGA-S9-A6WC | 6.4847 | 2.7444 | -1.2557 | 4 | 4 | LGG | 14.06 | 0 | NA | NA |
| TCGA-P5-A5F2 | 5.0693 | 2.7508 | -0.0565 | 4 | 4 | LGG | 7.95  | 0 | 21 | 10 |
| TCGA-DB-A4XE | 6.6980 | 2.7783 | 0.4564  | 4 | 4 | LGG | 37.42 | 0 | 20 | 13 |
| TCGA-DB-5276 | 6.9076 | 2.8130 | -0.4350 | 4 | 4 | LGG | 72.86 | 0 | 12 | NA |
| TCGA-DU-7011 | 6.6169 | 2.8382 | 0.1752  | 4 | 4 | LGG | ####  | 1 | NA | NA |
| TCGA-DU-7009 | 6.4641 | 2.8503 | -0.7346 | 4 | 4 | LGG | ####  | 1 | 13 | 7  |
| TCGA-S9-A6UB | 5.0331 | 2.8917 | 1.9742  | 4 | 4 | LGG | ####  | 0 | NA | NA |
| TCGA-DB-5274 | 6.6018 | 2.9014 | 2.0083  | 4 | 4 | LGG | 75.20 | 0 | 30 | NA |
| TCGA-WY-A85E | 7.0391 | 2.9187 | -1.4032 | 4 | 4 | LGG | 20.80 | 0 | NA | NA |
| TCGA-QH-A65V | 6.7590 | 2.9276 | 1.9276  | 4 | 4 | LGG | 12.61 | 0 | 19 | NA |
| TCGA-R8-A6MC | 5.9118 | 2.9315 | 1.7470  | 4 | 4 | LGG | 32.62 | 0 | NA | NA |
| TCGA-E1-A7Z2 | 6.7744 | 2.9624 | -0.2856 | 4 | 4 | LGG | 13.07 | 1 | NA | NA |
| TCGA-TQ-A7RQ | 4.9573 | 2.9724 | -0.0277 | 4 | 4 | LGG | 26.12 | 0 | NA | NA |
| TCGA-FG-A710 | 7.0336 | 3.0141 | -0.5094 | 4 | 4 | LGG | 36.63 | 0 | NA | NA |
| TCGA-WY-A85C | 5.4094 | 3.0309 | 1.0309  | 4 | 4 | LGG | 46.85 | 0 | NA | NA |
| TCGA-HW-7493 | 6.3442 | 3.0641 | -1.3284 | 4 | 4 | LGG | 69.22 | 0 | NA | NA |
| TCGA-HW-8321 | 5.8482 | 3.0729 | -0.6275 | 4 | 4 | LGG | 42.51 | 0 | 23 | NA |
| TCGA-HT-8111 | 7.0196 | 3.0852 | -1.4998 | 4 | 4 | LGG | 0.23  | 0 | 8  | 8  |
| TCGA-DB-A4XH | 5.9500 | 3.1426 | -0.8573 | 4 | 4 | LGG | 31.60 | 0 | 29 | NA |
| TCGA-HT-A74K | 6.6059 | 3.1465 | 5.1703  | 4 | 4 | LGG | 15.34 | 0 | NA | NA |
| TCGA-QH-A86X | 4.9808 | 3.1479 | 1.3178  | 4 | 4 | LGG | 11.07 | 0 | NA | NA |
| TCGA-HT-7471 | 5.6442 | 3.1584 | 0.6349  | 4 | 4 | LGG | 0.13  | 0 | 14 | 4  |
| TCGA-FG-8186 | 6.0172 | 3.1630 | 0.7845  | 4 | 4 | LGG | 16.00 | 0 | 22 | 5  |
| TCGA-HT-7877 | 5.7864 | 3.1705 | 1.4824  | 4 | 4 | LGG | 0.13  | 0 | 8  | 7  |
| TCGA-DU-5874 | 4.0777 | 3.1739 | 1.5416  | 4 | 4 | LGG | 15.14 | 0 | 29 | 6  |
| TCGA-DU-6393 | 4.4904 | 3.1768 | 1.7479  | 4 | 4 | LGG | 52.07 | 1 | 26 | 10 |
| TCGA-FG-7638 | 7.0938 | 3.2540 | 1.1166  | 4 | 4 | LGG | 22.54 | 0 | 10 | NA |
| TCGA-DU-A7TI | 6.9544 | 3.2661 | -1.1933 | 4 | 4 | LGG | 38.86 | 1 | NA | NA |
| TCGA-DB-A4XG | 4.3099 | 3.2834 | -1.4715 | 4 | 4 | LGG | 72.90 | 0 | 17 | 6  |
| TCGA-FG-5965 | 6.9318 | 3.2997 | -0.7004 | 4 | 4 | LGG | 36.79 | 1 | 31 | 15 |
| TCGA-P5-A731 | 6.8371 | 3.3466 | 0.8230  | 4 | 4 | LGG | 9.00  | 0 | NA | NA |
| TCGA-S9-A6WM | 7.1409 | 3.3554 | 0.6924  | 4 | 4 | LGG | 19.84 | 0 | NA | NA |
| TCGA-S9-A6WC | 5.6895 | 3.3599 | -1.2838 | 4 | 4 | LGG | 75.20 | 0 | NA | NA |
| TCGA-QH-A65R | 4.2533 | 3.3736 | -0.2702 | 4 | 4 | LGG | 15.14 | 0 | NA | NA |
| TCGA-DH-A66G | 6.4716 | 3.3841 | -0.2009 | 4 | 4 | LGG | 17.18 | 0 | NA | NA |
| TCGA-DU-A6S3 | 4.9748 | 3.3938 | -0.9986 | 4 | 4 | LGG | 21.55 | 0 | NA | NA |
| TCGA-DB-A64V | 6.6766 | 3.4318 | 0.3728  | 4 | 4 | LGG | 29.20 | 0 | 18 | 9  |
| TCGA-HW-7495 | 6.4761 | 3.4761 | 0.2031  | 4 | 4 | LGG | 35.41 | 0 | 11 | 4  |
| TCGA-DB-5278 | 5.7006 | 3.4798 | 0.3099  | 4 | 4 | LGG | 91.06 | 0 | 7  | 5  |
| TCGA-FG-7641 | 6.4665 | 3.5071 | -0.2478 | 4 | 4 | LGG | 20.60 | 0 | 19 | NA |
| TCGA-TM-A7CF | 6.4647 | 3.5351 | 0.7277  | 4 | 4 | LGG | 65.34 | 0 | NA | NA |
| TCGA-S9-A6TY | 6.6713 | 3.5581 | -0.2999 | 4 | 4 | LGG | 35.35 | 0 | NA | NA |
| TCGA-HT-7480 | 5.1917 | 3.5582 | -0.7271 | 4 | 4 | LGG | 75.13 | 0 | 16 | 8  |
| TCGA-HT-A4DS | 7.0274 | 3.5839 | -0.5037 | 4 | 4 | LGG | 0.23  | 0 | 29 | NA |
| TCGA-E1-5311 | 4.9911 | 3.5900 | 0.8896  | 4 | 4 | LGG | ####  | 1 | 12 | NA |
| TCGA-DB-A64X | 5.0349 | 3.5975 | -0.9874 | 4 | 4 | LGG | 18.50 | 0 | 53 | 20 |

|              |        |        |         |   |   |     |       |   |     |     |
|--------------|--------|--------|---------|---|---|-----|-------|---|-----|-----|
| TCGA-HT-7470 | 6.7690 | 3.6093 | 1.5313  | 4 | 4 | LGG | 40.08 | 1 | 30  | 13  |
| TCGA-HT-8010 | 6.5541 | 3.6261 | -1.2321 | 4 | 4 | LGG | 1.64  | 0 | 9   | 6   |
| TCGA-FG-5962 | 5.2670 | 3.6301 | -0.0704 | 4 | 4 | LGG | 47.73 | 0 | 31  | 19  |
| TCGA-HT-8564 | 6.9323 | 3.6595 | -0.4280 | 4 | 4 | LGG | 15.70 | 0 | 395 | 127 |
| TCGA-W9-A837 | 6.3531 | 3.6814 | 0.5522  | 4 | 4 | LGG | 51.02 | 0 | NA  | NA  |
| TCGA-S9-A6WF | 6.2379 | 3.6870 | 0.0625  | 4 | 4 | LGG | 18.63 | 0 | NA  | NA  |
| TCGA-S9-A7QZ | 5.1198 | 3.6930 | -0.3514 | 4 | 4 | LGG | 27.14 | 0 | NA  | NA  |
| TCGA-HT-A5R9 | 4.5228 | 3.7084 | -0.1496 | 4 | 4 | LGG | 0.07  | 0 | 32  | 24  |
| TCGA-DU-A6S2 | 6.8365 | 3.8326 | -0.1673 | 4 | 4 | LGG | 25.53 | 0 | NA  | NA  |
| TCGA-DU-7304 | 5.9632 | 3.8880 | 0.4956  | 4 | 4 | LGG | 23.29 | 1 | 20  | NA  |
| TCGA-E1-A7YV | 4.3757 | 3.9025 | -0.1419 | 4 | 4 | LGG | 32.42 | 1 | NA  | NA  |
| TCGA-S9-A7QY | 6.7227 | 3.9153 | -1.2546 | 4 | 4 | LGG | 28.35 | 0 | NA  | NA  |
| TCGA-HT-7681 | 5.8192 | 3.9180 | 0.8306  | 4 | 4 | LGG | 44.65 | 0 | 10  | 4   |
| TCGA-DB-A75L | 7.0137 | 3.9223 | -0.3257 | 4 | 4 | LGG | 11.24 | 0 | NA  | NA  |
| TCGA-HT-7695 | 6.8825 | 3.9283 | 0.6063  | 4 | 4 | LGG | 14.52 | 0 | 13  | 9   |
| TCGA-HT-7881 | 6.8340 | 3.9924 | 1.0228  | 4 | 4 | LGG | 35.45 | 0 | 10  | NA  |
| TCGA-DU-A7TC | 6.1102 | 4.0362 | 0.2288  | 4 | 4 | LGG | 37.35 | 0 | NA  | NA  |
| TCGA-DH-A7UF | 5.3179 | 4.0520 | 0.6597  | 4 | 4 | LGG | 54.20 | 0 | NA  | NA  |
| TCGA-P5-A780 | 6.1103 | 4.1022 | 0.2277  | 4 | 4 | LGG | 2.37  | 0 | NA  | NA  |
| TCGA-S9-A6TS | 6.7374 | 4.1040 | -0.1815 | 4 | 4 | LGG | 62.12 | 1 | NA  | NA  |
| TCGA-VM-A8CA | 6.7724 | 4.1056 | 2.3213  | 4 | 4 | LGG | 13.50 | 0 | NA  | NA  |
| TCGA-HT-8109 | 6.2967 | 4.1234 | -1.4313 | 4 | 4 | LGG | 5.55  | 0 | 27  | NA  |
| TCGA-QH-A6CZ | 6.9303 | 4.1323 | 1.8428  | 4 | 4 | LGG | 9.17  | 0 | NA  | NA  |
| TCGA-DU-6392 | 7.1080 | 4.1347 | -0.2803 | 4 | 4 | LGG | ####  | 0 | NA  | NA  |
| TCGA-FG-6689 | 6.8786 | 4.1423 | -0.0277 | 4 | 4 | LGG | 14.91 | 0 | 15  | NA  |
| TCGA-DU-8168 | 3.8384 | 4.1556 | 1.0775  | 4 | 4 | LGG | 14.16 | 0 | 45  | NA  |
| TCGA-DU-A76K | 6.6682 | 4.1785 | 2.0716  | 4 | 4 | LGG | 11.40 | 1 | NA  | NA  |
| TCGA-HT-7483 | 4.9942 | 4.1787 | -0.4651 | 4 | 4 | LGG | ####  | 0 | 11  | 5   |
| TCGA-F6-A8O4 | 6.6253 | 4.1990 | 1.3917  | 4 | 4 | LGG | 0.20  | 0 | NA  | NA  |
| TCGA-QH-A6XC | 6.9205 | 4.2269 | 0.7675  | 4 | 4 | LGG | 16.69 | 0 | NA  | NA  |
| TCGA-HT-7467 | 6.3723 | 4.2324 | 1.4250  | 4 | 4 | LGG | 0.10  | 0 | 24  | 4   |
| TCGA-HT-7610 | 5.7683 | 4.2477 | 0.4403  | 4 | 4 | LGG | 56.04 | 0 | 10  | 6   |
| TCGA-P5-A5F4 | 6.6116 | 4.2568 | 2.7714  | 4 | 4 | LGG | 7.59  | 0 | 25  | 5   |
| TCGA-HT-7475 | 6.3078 | 4.2836 | 0.4009  | 4 | 4 | LGG | 17.41 | 0 | 36  | 6   |
| TCGA-HT-A5R7 | 6.7565 | 4.2949 | -1.0625 | 4 | 4 | LGG | 20.20 | 0 | 15  | 7   |
| TCGA-DB-5270 | 6.7045 | 4.3056 | 0.0325  | 4 | 4 | LGG | ####  | 0 | NA  | 7   |
| TCGA-P5-A5F0 | 5.3118 | 4.3131 | 0.4386  | 4 | 4 | LGG | 9.43  | 0 | 24  | 8   |
| TCGA-HT-8015 | 6.8814 | 4.3190 | -0.1728 | 4 | 4 | LGG | 0.10  | 0 | 1   | 1   |
| TCGA-HW-A5KJ | 4.7148 | 4.3844 | -0.0080 | 4 | 4 | LGG | 31.60 | 1 | 37  | 13  |
| TCGA-DU-7292 | 7.0807 | 4.5233 | -0.0616 | 4 | 4 | LGG | 7.95  | 1 | 31  | 9   |
| TCGA-HT-7476 | 6.3569 | 4.5555 | 1.0445  | 4 | 4 | LGG | 6.54  | 0 | 14  | 3   |
| TCGA-DB-5279 | 7.0090 | 4.6917 | 2.2948  | 4 | 4 | LGG | 44.48 | 0 | 34  | NA  |
| TCGA-DU-7309 | 6.5264 | 4.7479 | 1.3728  | 4 | 4 | LGG | 2.76  | 0 | 25  | 11  |
| TCGA-QH-A6CY | 6.7612 | 4.7638 | 2.1147  | 4 | 4 | LGG | 13.40 | 0 | NA  | NA  |
| TCGA-DB-A64W | 5.0536 | 4.8061 | 1.1507  | 4 | 4 | LGG | 14.39 | 1 | 37  | NA  |
| TCGA-DU-5849 | 5.6393 | 4.8068 | 1.2833  | 4 | 4 | LGG | 14.55 | 0 | 25  | NA  |
| TCGA-DU-A6S6 | 4.8198 | 4.8441 | 1.5222  | 4 | 4 | LGG | 95.04 | 0 | NA  | NA  |
| TCGA-TM-A7C4 | 6.5431 | 4.8678 | -0.0392 | 4 | 4 | LGG | 48.29 | 0 | NA  | NA  |
| TCGA-DB-A64L | 5.5465 | 4.8697 | -1.1075 | 4 | 4 | LGG | 24.18 | 0 | 54  | 30  |
| TCGA-HT-7880 | 6.9202 | 4.9287 | 0.3437  | 4 | 4 | LGG | 5.32  | 0 | 6   | NA  |
| TCGA-HT-A616 | 5.3193 | 4.9667 | -1.0556 | 4 | 4 | LGG | 1.81  | 0 | 13  | 6   |
| TCGA-FG-A713 | 6.6366 | 4.9960 | -0.2136 | 4 | 4 | LGG | 20.43 | 0 | NA  | NA  |
| TCGA-HT-8105 | 4.6247 | 5.0541 | -0.6041 | 4 | 4 | LGG | 6.24  | 0 | 40  | 21  |
| TCGA-WY-A859 | 6.4922 | 5.0977 | 0.3698  | 4 | 4 | LGG | 39.85 | 0 | NA  | NA  |

|              |         |         |          |   |   |      |       |   |      |     |
|--------------|---------|---------|----------|---|---|------|-------|---|------|-----|
| TCGA-HT-7474 | 6.8765  | 5.1212  | 1.8284   | 4 | 4 | LGG  | 3.75  | 0 | 15   | 7   |
| TCGA-HT-A61A | 6.7266  | 5.2010  | 0.9531   | 4 | 4 | LGG  | 6.37  | 0 | 7    | NA  |
| TCGA-HW-7489 | 6.4146  | 5.2059  | 1.9374   | 4 | 4 | LGG  | 41.46 | 1 | 8    | NA  |
| TCGA-HT-7688 | 6.2826  | 5.3082  | 0.1283   | 4 | 4 | LGG  | 31.67 | 0 | 56   | NA  |
| TCGA-HW-7487 | 5.6579  | 5.3288  | -0.1470  | 4 | 4 | LGG  | 45.40 | 0 | 13   | NA  |
| TCGA-HT-7856 | 7.1102  | 5.3432  | -0.7011  | 4 | 4 | LGG  | 39.06 | 0 | 5    | NA  |
| TCGA-QH-A6CE | 6.4714  | 5.3503  | 0.0284   | 4 | 4 | LGG  | 19.32 | 0 | NA   | NA  |
| TCGA-P5-A5EY | 6.6216  | 5.3511  | 0.0291   | 4 | 4 | LGG  | 2.37  | 0 | 0    | 0   |
| TCGA-DU-A7TG | 6.4095  | 5.3534  | 0.7096   | 4 | 4 | LGG  | 44.38 | 1 | NA   | NA  |
| TCGA-DB-A75P | 6.8496  | 5.3815  | 0.4746   | 4 | 4 | LGG  | 16.16 | 0 | NA   | NA  |
| TCGA-FG-7643 | 6.8480  | 5.3944  | 0.8583   | 4 | 4 | LGG  | 20.07 | 0 | 38   | 18  |
| TCGA-HT-7874 | 6.3046  | 5.4000  | -0.5773  | 4 | 4 | LGG  | 37.12 | 0 | 18   | NA  |
| TCGA-HT-8107 | 6.4794  | 5.4111  | 1.2759   | 4 | 4 | LGG  | 0.46  | 0 | NA   | 2   |
| TCGA-DU-8162 | 6.9643  | 5.4345  | 1.4345   | 4 | 4 | LGG  | 14.59 | 1 | 16   | 5   |
| TCGA-DB-5281 | 6.7799  | 5.4365  | 0.2368   | 4 | 4 | LGG  | 78.22 | 0 | 43   | 5   |
| TCGA-HT-7607 | 6.2421  | 5.4630  | -0.5705  | 4 | 4 | LGG  | 3.15  | 1 | 22   | 7   |
| TCGA-S9-A7IQ | 5.9370  | 5.4675  | 1.2525   | 4 | 4 | LGG  | 36.10 | 0 | NA   | NA  |
| TCGA-HT-8558 | 6.7648  | 5.4802  | 2.3103   | 4 | 4 | LGG  | 13.73 | 0 | 1    | NA  |
| TCGA-FG-5964 | 5.7232  | 5.5321  | -1.2881  | 4 | 4 | LGG  | 52.17 | 0 | 30   | NA  |
| TCGA-TM-A84R | 6.1685  | 5.5995  | 1.0026   | 4 | 4 | LGG  | 18.59 | 0 | NA   | NA  |
| TCGA-E1-A7Z3 | 6.5460  | 5.6638  | 3.2393   | 4 | 4 | LGG  | 73.42 | 1 | NA   | NA  |
| TCGA-S9-A6WL | 6.9616  | 5.7334  | -1.1491  | 4 | 4 | LGG  | 31.08 | 0 | NA   | NA  |
| TCGA-HT-8113 | 6.3530  | 5.8146  | 1.1592   | 4 | 4 | LGG  | 29.57 | 0 | 16   | 6   |
| TCGA-HT-7603 | 6.0619  | 5.8511  | 1.5453   | 4 | 4 | LGG  | 23.16 | 0 | 23   | NA  |
| TCGA-S9-A6WI | 6.0830  | 5.9440  | 1.7984   | 4 | 4 | LGG  | 84.92 | 0 | NA   | NA  |
| TCGA-HT-8019 | 6.3473  | 5.9783  | 2.6855   | 4 | 4 | LGG  | 32.98 | 0 | 0    | 1   |
| TCGA-FG-8181 | 6.0181  | 6.0005  | 2.6518   | 4 | 4 | LGG  | 28.32 | 0 | NA   | 1   |
| TCGA-FG-8189 | 6.7124  | 6.1150  | 3.0370   | 4 | 4 | LGG  | 22.50 | 0 | 2    | 1   |
| TCGA-E1-A7YY | 6.1708  | 6.2240  | 1.6093   | 4 | 4 | LGG  | ####  | 1 | NA   | NA  |
| TCGA-CS-6669 | 6.3232  | 6.3958  | 2.4494   | 4 | 4 | LGG  | 49.08 | 0 | NA   | 1   |
| TCGA-OR-A5KT | 6.9231  | 7.9518  | 7.8946   | 4 | 4 | ACC  | 95.11 | 0 | 37   | NA  |
| TCGA-OR-A5KV | 6.4771  | 5.5561  | 7.5111   | 4 | 4 | ACC  | ####  | 0 | 33   | NA  |
| TCGA-OR-A5KW | 5.6961  | 0.1112  | 6.5205   | 4 | 4 | ACC  | 68.20 | 0 | 35   | NA  |
| TCGA-OR-A5LA | 6.6477  | -0.1725 | 4.9150   | 4 | 4 | ACC  | 23.62 | 0 | 17   | NA  |
| TCGA-OR-A5KU | 6.7994  | -0.4199 | 4.1652   | 4 | 4 | ACC  | ####  | 0 | 29   | NA  |
| TCGA-OR-A5LG | 7.0581  | -1.1361 | 4.1494   | 4 | 4 | ACC  | 52.20 | 0 | 35   | NA  |
| TCGA-PA-A5YG | 6.6618  | 1.2089  | 4.0964   | 4 | 4 | ACC  | 24.84 | 0 | 26   | NA  |
| TCGA-OR-A5JK | 6.1485  | -0.3906 | 3.6093   | 4 | 4 | ACC  | 49.18 | 0 | 36   | NA  |
| TCGA-OR-A5L9 | 6.5966  | 2.4266  | 3.4266   | 4 | 4 | ACC  | 28.61 | 0 | 31   | NA  |
| TCGA-OR-A5L5 | 6.6509  | 0.1274  | 3.3753   | 4 | 4 | ACC  | 43.27 | 0 | 30   | NA  |
| TCGA-OR-A5LM | 7.1586  | -0.7362 | 3.2638   | 4 | 4 | ACC  | 61.04 | 0 | NA   | NA  |
| TCGA-OR-A5JI | 7.2540  | 0.8876  | 3.2096   | 4 | 4 | ACC  | 76.58 | 0 | 21   | NA  |
| TCGA-OR-A5L6 | 6.8797  | 0.9024  | 2.4874   | 4 | 4 | ACC  | 28.29 | 0 | 51   | NA  |
| TCGA-OR-A5L4 | 6.5380  | -0.4955 | 2.3119   | 4 | 4 | ACC  | 31.77 | 0 | 35   | NA  |
| TCGA-OR-A5JD | 6.2218  | -0.7207 | 2.0866   | 4 | 4 | ACC  | 99.80 | 0 | 49   | NA  |
| TCGA-OR-A5KC | 6.6546  | 3.0764  | 2.0764   | 4 | 4 | ACC  | 46.45 | 0 | 39   | NA  |
| TCGA-EE-A2GL | 6.92530 | 4.23498 | 0.77551  | 4 | 4 | SKCM | 80    | 0 | 282  | NA  |
| TCGA-EB-A299 | 6.86045 | 3.13731 | 0.96739  | 4 | 4 | SKCM | 12    | 0 | 129  | 19  |
| TCGA-FS-A1ZQ | 6.80495 | 2.99311 | -1.53032 | 4 | 4 | SKCM | 133   | 1 | 396  | 53  |
| TCGA-EE-A182 | 6.53498 | 2.98581 | 1.22027  | 4 | 4 | SKCM | 15    | 1 | 1156 | 299 |
| TCGA-EB-A4OY | 5.67025 | 2.98220 | 0.81229  | 4 | 4 | SKCM | 32    | 0 | 59   | NA  |
| TCGA-FR-A728 | 5.94685 | 2.93727 | -0.23260 | 4 | 4 | SKCM | 19    | 0 | 346  | NA  |
| TCGA-EB-A3XE | 6.77141 | 2.87831 | -0.92906 | 4 | 4 | SKCM | 6     | 0 | 20   | NA  |
| TCGA-DA-A1I0 | 6.99945 | 2.77705 | 0.19207  | 4 | 4 | SKCM | 20    | 1 | 391  | 44  |

|              |         |         |          |   |   |      |     |   |     |    |
|--------------|---------|---------|----------|---|---|------|-----|---|-----|----|
| TCGA-D3-A8GN | 6.43854 | 2.76611 | -0.81883 | 4 | 4 | SKCM | 161 | 0 | NA  | NA |
| TCGA-GV-A3QF | #####   | #####   | #####    | 4 | 4 | BLCA | 20  | 1 | 116 | 25 |
| TCGA-BT-A3PH | #####   | #####   | #####    | 4 | 4 | BLCA | 5   | 1 | 405 | 35 |
| TCGA-CF-A3MF | #####   | #####   | #####    | 4 | 4 | BLCA | 13  | 0 | 28  | 7  |
| TCGA-CU-A3YL | #####   | #####   | #####    | 4 | 4 | BLCA | 30  | 0 | 211 | 51 |
| TCGA-2F-A9KQ | #####   | #####   | #####    | 4 | 4 | BLCA | 95  | 0 | NA  | NA |
| TCGA-YC-A89H | #####   | #####   | #####    | 4 | 4 | BLCA | 19  | 0 | NA  | NA |
| TCGA-2F-A9KR | #####   | #####   | #####    | 4 | 4 | BLCA | 105 | 1 | NA  | NA |
| TCGA-2F-A9KT | #####   | #####   | #####    | 4 | 4 | BLCA | 109 | 0 | NA  | NA |
| TCGA-4Z-AA83 | #####   | #####   | #####    | 4 | 4 | BLCA | 66  | 0 | NA  | NA |
| TCGA-UY-A9PF | #####   | #####   | #####    | 4 | 4 | BLCA | 4   | 0 | NA  | NA |
| TCGA-XF-AAMZ | #####   | #####   | #####    | 4 | 4 | BLCA | 44  | 1 | NA  | NA |
| TCGA-FD-A5C0 | #####   | #####   | #####    | 4 | 4 | BLCA | 18  | 1 | NA  | NA |
| TCGA-E7-A97Q | #####   | #####   | #####    | 4 | 4 | BLCA | 8   | 1 | NA  | NA |
| TCGA-DK-A1A6 | #####   | #####   | #####    | 4 | 4 | BLCA | 66  | 0 | 283 | 58 |
| TCGA-ZF-A9R1 | #####   | #####   | #####    | 4 | 4 | BLCA | 25  | 0 | NA  | NA |
| TCGA-E7-A7PW | #####   | #####   | #####    | 4 | 4 | BLCA | 14  | 0 | NA  | NA |
| TCGA-GV-A3JW | #####   | #####   | #####    | 4 | 4 | BLCA | 21  | 0 | 80  | 17 |
| TCGA-E7-A519 | #####   | #####   | #####    | 4 | 4 | BLCA | 17  | 0 | NA  | NA |
| TCGA-K4-A5RI | #####   | #####   | #####    | 4 | 4 | BLCA | 12  | 1 | NA  | NA |
| TCGA-FD-A3B5 | #####   | #####   | #####    | 4 | 4 | BLCA | 9   | 1 | 137 | 38 |
| TCGA-DK-AA6T | #####   | #####   | #####    | 4 | 4 | BLCA | 19  | 0 | NA  | NA |
| TCGA-GV-A3JV | #####   | #####   | #####    | 4 | 4 | BLCA | 14  | 1 | 110 | 18 |
| TCGA-CU-A5W€ | #####   | #####   | #####    | 4 | 4 | BLCA | 2   | 1 | NA  | NA |
| TCGA-XF-AAN2 | #####   | #####   | #####    | 4 | 4 | BLCA | 61  | 1 | NA  | NA |
| TCGA-XF-A9T0 | #####   | #####   | #####    | 4 | 4 | BLCA | 26  | 0 | NA  | NA |
| TCGA-GU-A767 | #####   | #####   | #####    | 4 | 4 | BLCA | 5   | 1 | NA  | NA |
| TCGA-GC-A3WC | #####   | #####   | #####    | 4 | 4 | BLCA | 18  | 0 | 132 | 24 |
| TCGA-FD-A6TC | #####   | #####   | #####    | 4 | 4 | BLCA | 6   | 0 | NA  | NA |
| TCGA-GC-A3RC | #####   | #####   | #####    | 4 | 4 | BLCA | 14  | 0 | 80  | 14 |
| TCGA-CF-A47W | #####   | #####   | #####    | 4 | 4 | BLCA | 12  | 0 | NA  | NA |
| TCGA-GU-A42R | #####   | #####   | #####    | 4 | 4 | BLCA | 19  | 1 | 129 | 38 |
| TCGA-H4-A2HQ | #####   | #####   | #####    | 4 | 4 | BLCA | 19  | 0 | 396 | 96 |
| TCGA-UY-A78M | #####   | #####   | #####    | 4 | 4 | BLCA | 23  | 1 | NA  | NA |
| TCGA-BT-A20P | #####   | #####   | #####    | 4 | 4 | BLCA | 18  | 1 | 93  | 11 |
| TCGA-GD-A6C6 | #####   | #####   | #####    | 4 | 4 | BLCA | 2   | 0 | NA  | NA |
| TCGA-E5-A4U1 | #####   | #####   | #####    | 4 | 4 | BLCA | 39  | 0 | NA  | NA |
| TCGA-E7-A678 | #####   | #####   | #####    | 4 | 4 | BLCA | 26  | 0 | NA  | NA |
| TCGA-YF-AA3L | #####   | #####   | #####    | 4 | 4 | BLCA | 12  | 0 | NA  | NA |
| TCGA-UY-A780 | #####   | #####   | #####    | 4 | 4 | BLCA | 76  | 0 | NA  | NA |
| TCGA-KQ-A41N | #####   | #####   | #####    | 4 | 4 | BLCA | 53  | 0 | NA  | NA |
| TCGA-XF-A9SH | #####   | #####   | #####    | 4 | 4 | BLCA | 65  | 1 | NA  | NA |
| TCGA-GD-A2C5 | #####   | #####   | #####    | 4 | 4 | BLCA | 27  | 0 | 251 | 68 |
| TCGA-DK-AA71 | #####   | #####   | #####    | 4 | 4 | BLCA | 14  | 0 | NA  | NA |
| TCGA-BT-A20T | #####   | #####   | #####    | 4 | 4 | BLCA | 15  | 1 | 239 | 43 |
| TCGA-GU-AATC | #####   | #####   | #####    | 4 | 4 | BLCA | 7   | 1 | NA  | NA |
| TCGA-DK-A3X2 | #####   | #####   | #####    | 4 | 4 | BLCA | 18  | 1 | NA  | NA |
| TCGA-CF-A47V | #####   | #####   | #####    | 4 | 4 | BLCA | 12  | 0 | NA  | NA |
| TCGA-XF-A8HE | #####   | #####   | #####    | 4 | 4 | BLCA | 125 | 0 | NA  | NA |
| TCGA-BT-A0S7 | #####   | #####   | #####    | 4 | 4 | BLCA | 7   | 1 | 41  | 8  |
| TCGA-DK-A6B0 | #####   | #####   | #####    | 4 | 4 | BLCA | 77  | 0 | NA  | NA |
| TCGA-ZF-A9RC | #####   | #####   | #####    | 4 | 4 | BLCA | 94  | 0 | NA  | NA |
| TCGA-FD-A6TG | #####   | #####   | #####    | 4 | 4 | BLCA | 3   | 1 | NA  | NA |
| TCGA-CF-A7I0 | #####   | #####   | #####    | 4 | 4 | BLCA | 12  | 0 | NA  | NA |

|              |       |       |       |   |   |      |    |   |      |     |
|--------------|-------|-------|-------|---|---|------|----|---|------|-----|
| TCGA-XF-A9SV | ##### | ##### | ##### | 4 | 4 | BLCA | 13 | 1 | NA   | NA  |
| TCGA-FD-A3SO | ##### | ##### | ##### | 4 | 4 | BLCA | 6  | 1 | 308  | 80  |
| TCGA-FD-A3SN | ##### | ##### | ##### | 4 | 4 | BLCA | 29 | 0 | 323  | 89  |
| TCGA-XF-AAN1 | ##### | ##### | ##### | 4 | 4 | BLCA | 31 | 1 | NA   | NA  |
| TCGA-BT-A20W | ##### | ##### | ##### | 4 | 4 | BLCA | 8  | 1 | 86   | 15  |
| TCGA-ZF-AA56 | ##### | ##### | ##### | 4 | 4 | BLCA | 9  | 1 | NA   | NA  |
| TCGA-FD-A3SJ | ##### | ##### | ##### | 4 | 4 | BLCA | 24 | 1 | 199  | 34  |
| TCGA-UY-A78L | ##### | ##### | ##### | 4 | 4 | BLCA | 37 | 0 | NA   | NA  |
| TCGA-GC-A3YS | ##### | ##### | ##### | 4 | 4 | BLCA | 25 | 0 | 220  | 48  |
| TCGA-4Z-AA7S | ##### | ##### | ##### | 4 | 4 | BLCA | 35 | 1 | NA   | NA  |
| TCGA-XF-A9SJ | ##### | ##### | ##### | 4 | 4 | BLCA | 3  | 1 | NA   | NA  |
| TCGA-DK-A6B1 | ##### | ##### | ##### | 4 | 4 | BLCA | 67 | 0 | NA   | NA  |
| TCGA-XF-A9T8 | ##### | ##### | ##### | 4 | 4 | BLCA | 14 | 1 | NA   | NA  |
| TCGA-XF-A9SK | ##### | ##### | ##### | 4 | 4 | BLCA | 16 | 1 | NA   | NA  |
| TCGA-LT-A5Z6 | ##### | ##### | ##### | 4 | 4 | BLCA | 16 | 0 | NA   | NA  |
| TCGA-E7-A3X6 | ##### | ##### | ##### | 4 | 4 | BLCA | 30 | 1 | 108  | 23  |
| TCGA-G2-AA3D | ##### | ##### | ##### | 4 | 4 | BLCA | 70 | 0 | NA   | NA  |
| TCGA-DK-A1A7 | ##### | ##### | ##### | 4 | 4 | BLCA | 18 | 0 | 198  | 37  |
| TCGA-SY-A9G5 | ##### | ##### | ##### | 4 | 4 | BLCA | 39 | 0 | NA   | NA  |
| TCGA-R3-A69X | ##### | ##### | ##### | 4 | 4 | BLCA | 14 | 0 | NA   | NA  |
| TCGA-BL-A13J | ##### | ##### | ##### | 4 | 4 | BLCA | 3  | 1 | 93   | 13  |
| TCGA-DK-A3WV | ##### | ##### | ##### | 4 | 4 | BLCA | 21 | 0 | 1039 | 222 |
| TCGA-G2-A2EJ | ##### | ##### | ##### | 4 | 4 | BLCA | 48 | 0 | 274  | 39  |
| TCGA-XF-A8HF | ##### | ##### | ##### | 4 | 4 | BLCA | 97 | 1 | NA   | NA  |
| TCGA-E7-A7XN | ##### | ##### | ##### | 4 | 4 | BLCA | 14 | 0 | NA   | NA  |
| TCGA-ZF-AA4W | ##### | ##### | ##### | 4 | 4 | BLCA | 60 | 0 | NA   | NA  |
| TCGA-DK-A2I1 | ##### | ##### | ##### | 4 | 4 | BLCA | 18 | 0 | 215  | 45  |
| TCGA-CF-A1HS | ##### | ##### | ##### | 4 | 4 | BLCA | 13 | 0 | 266  | 64  |
| TCGA-BT-A2LA | ##### | ##### | ##### | 4 | 4 | BLCA | 17 | 0 | NA   | 38  |
| TCGA-FD-A3SQ | ##### | ##### | ##### | 4 | 4 | BLCA | 47 | 1 | 71   | 11  |
| TCGA-2F-A9KO | ##### | ##### | ##### | 4 | 4 | BLCA | 24 | 1 | NA   | NA  |
| TCGA-XF-AAMV | ##### | ##### | ##### | 4 | 4 | BLCA | 8  | 1 | NA   | NA  |
| TCGA-UY-A78P | ##### | ##### | ##### | 4 | 4 | BLCA | 78 | 0 | NA   | NA  |
| TCGA-ZF-AA51 | ##### | ##### | ##### | 4 | 4 | BLCA | 56 | 0 | NA   | NA  |
| TCGA-GC-A6I3 | ##### | ##### | ##### | 4 | 4 | BLCA | 14 | 0 | NA   | NA  |
| TCGA-E7-A6MD | ##### | ##### | ##### | 4 | 4 | BLCA | 4  | 0 | NA   | NA  |
| TCGA-DK-A1A5 | ##### | ##### | ##### | 4 | 4 | BLCA | 2  | 1 | 237  | 74  |
| TCGA-FD-A43Y | ##### | ##### | ##### | 4 | 4 | BLCA | 16 | 1 | NA   | NA  |
| TCGA-YC-A8S6 | ##### | ##### | ##### | 4 | 4 | BLCA | 10 | 0 | NA   | NA  |
| TCGA-BT-A2LB | ##### | ##### | ##### | 4 | 4 | BLCA | 16 | 1 | 488  | 101 |
| TCGA-CU-A0YN | ##### | ##### | ##### | 4 | 4 | BLCA | 13 | 1 | 132  | 22  |
| TCGA-LC-A66R | ##### | ##### | ##### | 4 | 4 | BLCA | 15 | 0 | NA   | NA  |
| TCGA-E7-A7DV | ##### | ##### | ##### | 4 | 4 | BLCA | 1  | 0 | NA   | NA  |
| TCGA-FT-A61P | ##### | ##### | ##### | 4 | 4 | BLCA | 11 | 0 | NA   | NA  |
| TCGA-G2-A2EK | ##### | ##### | ##### | 4 | 4 | BLCA | 16 | 0 | 69   | 21  |
| TCGA-CF-A5UA | ##### | ##### | ##### | 4 | 4 | BLCA | 12 | 0 | NA   | NA  |
| TCGA-ZF-A9RD | ##### | ##### | ##### | 4 | 4 | BLCA | 13 | 1 | NA   | NA  |
| TCGA-FJ-A3ZE | ##### | ##### | ##### | 4 | 4 | BLCA | 11 | 1 | 359  | 88  |
| TCGA-XF-AAMF | ##### | ##### | ##### | 4 | 4 | BLCA | 92 | 0 | NA   | NA  |
| TCGA-GC-A3I6 | ##### | ##### | ##### | 4 | 4 | BLCA | 21 | 1 | 170  | 36  |
| TCGA-XF-A9SU | ##### | ##### | ##### | 4 | 4 | BLCA | 6  | 1 | NA   | NA  |
| TCGA-FD-A5BU | ##### | ##### | ##### | 4 | 4 | BLCA | 19 | 0 | NA   | NA  |
| TCGA-BT-A3PK | ##### | ##### | ##### | 4 | 4 | BLCA | 10 | 1 | 315  | 78  |
| TCGA-XF-A9T3 | ##### | ##### | ##### | 4 | 4 | BLCA | 2  | 0 | NA   | NA  |

|              |          |          |          |   |   |      |       |     |      |      |
|--------------|----------|----------|----------|---|---|------|-------|-----|------|------|
| TCGA-ZF-AA4R | #####    | #####    | #####    | 4 | 4 | BLCA | 34    | 1   | NA   | NA   |
| TCGA-G2-A2ES | #####    | #####    | #####    | 4 | 4 | BLCA | 33    | 1   | 386  | 91   |
| TCGA-HQ-A2OE | #####    | #####    | #####    | 4 | 4 | BLCA | 39    | 0   | 141  | 30   |
| TCGA-DK-A3IK | #####    | #####    | #####    | 4 | 4 | BLCA | 5     | 1   | 195  | 40   |
| TCGA-CF-A9FM | #####    | #####    | #####    | 4 | 4 | BLCA | 13    | 0   | NA   | NA   |
| TCGA-C4-A0EZ | #####    | #####    | #####    | 4 | 4 | BLCA | 9     | 1   | NA   | 23   |
| TCGA-UY-A8OD | #####    | #####    | #####    | 4 | 4 | BLCA | 113   | 0   | NA   | NA   |
| TCGA-KK-A6E3 | 7.544624 | 3.287796 | 5.609720 | 4 | 4 | PRAD | 67.54 | 0.0 | 43   | 13   |
| TCGA-G9-6379 | 6.970456 | 1.890093 | 5.033040 | 4 | 4 | PRAD | 58.41 | 0.0 | 22   | 3    |
| TCGA-HC-A6AF | 7.194121 | 2.116132 | 4.853082 | 4 | 4 | PRAD | 2.33  | 0.0 | 41   | 8    |
| TCGA-G9-6347 | 6.367617 | 4.556227 | 4.691154 | 4 | 4 | PRAD | 68.63 | 0.0 | 26   | 5    |
| TCGA-J4-A67O | 7.129332 | 2.743278 | 4.605773 | 4 | 4 | PRAD | 27.56 | 0.0 | 25   | 6    |
| TCGA-KK-A8I4 | 7.407198 | 2.564061 | 4.438512 | 4 | 4 | PRAD | 74.21 | 0.0 | NA   | NA   |
| TCGA-YL-A8HO | 7.381657 | 2.019097 | 4.421176 | 4 | 4 | PRAD | 75.69 | 0.0 | NA   | NA   |
| TCGA-G9-6498 | 7.089752 | 2.929280 | 4.301251 | 4 | 4 | PRAD | 64.13 | 0.0 | 31   | 10   |
| TCGA-X4-A8KS | 6.813649 | 1.726177 | 4.249749 | 4 | 4 | PRAD | 32.16 | 0.0 | NA   | NA   |
| TCGA-HI-7170 | 7.515173 | 3.363451 | 4.232200 | 4 | 4 | PRAD | 82.85 | 0.0 | 33   | 6    |
| TCGA-J4-A67M | 6.698528 | 2.617696 | 4.132264 | 4 | 4 | PRAD | 30.91 | 0.0 | 34   | 5    |
| TCGA-HC-A6AS | 7.104933 | 3.266547 | 4.028392 | 4 | 4 | PRAD | 1.45  | 0.0 | 28   | 3    |
| TCGA-X4-A8KQ | 7.122548 | 1.289829 | 3.952790 | 4 | 4 | PRAD | 45.43 | 0.0 | NA   | NA   |
| TCGA-M7-A723 | 7.154214 | 3.322808 | 3.935790 | 4 | 4 | PRAD | 25.07 | 0.0 | NA   | NA   |
| TCGA-G9-6378 | 7.567062 | 2.245523 | 3.889396 | 4 | 4 | PRAD | 37.94 | 0.0 | 29   | 3    |
| TCGA-ZG-A9NI | 6.845213 | 1.587840 | 3.835752 | 4 | 4 | PRAD | 4.34  | 0.0 | NA   | NA   |
| TCGA-V1-A8MU | 7.387107 | 2.384240 | 3.782786 | 4 | 4 | PRAD | 61.63 | 0.0 | NA   | NA   |
| TCGA-KK-A8I9 | 6.979248 | 1.296892 | 3.675409 | 4 | 4 | PRAD | 32.88 | 0.0 | NA   | NA   |
| TCGA-J4-A67R | 7.039009 | 3.189839 | 3.625937 | 4 | 4 | PRAD | 29.89 | 0.0 | 31   | 7    |
| TCGA-EJ-5521 | 7.133102 | 3.737806 | 3.423699 | 4 | 4 | PRAD | 74.87 | 0.0 | 52   | 13   |
| TCGA-KC-A7FE | 7.390914 | 2.568908 | 3.405407 | 4 | 4 | PRAD | 11.56 | 0.0 | NA   | NA   |
| TCGA-HC-A6AC | 7.129119 | 1.180021 | 3.381629 | 4 | 4 | PRAD | 3.48  | 0.0 | 22   | 3    |
| TCGA-G9-7519 | 7.402256 | 2.476249 | 3.376721 | 4 | 4 | PRAD | 27.89 | 0.0 | 38   | 5    |
| TCGA-KC-A4BV | 7.511640 | 1.085629 | 3.333553 | 4 | 4 | PRAD | 43.63 | 0.0 | 33   | 10   |
| TCGA-H9-A6BX | 7.531053 | 3.909322 | 3.301646 | 4 | 4 | PRAD | 30.91 | 0.0 | 11   | 3    |
| TCGA-J4-A67T | 7.350843 | 1.099086 | 3.300753 | 4 | 4 | PRAD | 6.01  | 0.0 | 14   | 5    |
| TCGA-HC-A6HX | 6.843066 | 2.561033 | 3.271530 | 4 | 4 | PRAD | 1.25  | 0.0 | 32   | 4    |
| TCGA-J9-A8CL | 6.865324 | 2.334797 | 3.252338 | 4 | 4 | PRAD | 13.30 | 0.0 | NA   | NA   |
| TCGA-QU-A6IL | 6.369044 | 3.438306 | 3.245661 | 4 | 4 | PRAD | 3.19  | 0.0 | 26   | 7    |
| TCGA-KK-A7AV | 7.287561 | 1.658189 | 3.243166 | 4 | 4 | PRAD | 27.00 | 0.0 | NA   | NA   |
| TCGA-KK-A7B2 | 7.355668 | 1.482843 | 3.160902 | 4 | 4 | PRAD | 36.10 | 0.0 | NA   | NA   |
| TCGA-HC-A6HY | 7.309018 | 1.711231 | 3.151810 | 4 | 4 | PRAD | 4.40  | 0.0 | 30   | 6    |
| TCGA-EJ-7318 | 7.076369 | 2.126044 | 3.126046 | 4 | 4 | PRAD | 33.80 | 0.0 | NA   | NA   |
| TCGA-J9-A52C | 7.276155 | 1.972362 | 3.087853 | 4 | 4 | PRAD | 5.85  | 0.0 | 483  | 125  |
| TCGA-EJ-7791 | 7.202179 | 1.889629 | 3.059561 | 4 | 4 | PRAD | 36.73 | 0.0 | 21   | 3    |
| TCGA-EJ-A46H | 7.503182 | 1.736947 | 3.017067 | 4 | 4 | PRAD | 23.78 | 0.0 | #N/A | #N/A |
| TCGA-KC-A4BR | 7.103587 | 2.248808 | 3.014320 | 4 | 4 | PRAD | 44.32 | 0.0 | 11   | 2    |
| TCGA-V1-A8ML | 7.269795 | 1.325617 | 3.003674 | 4 | 4 | PRAD | 14.72 | 0.0 | NA   | NA   |
| TCGA-J4-A67Q | 6.930925 | 2.992333 | 2.992333 | 4 | 4 | PRAD | 32.03 | 0.0 | 24   | 6    |
| TCGA-ZG-A8QZ | 7.386273 | 2.394758 | 2.942250 | 4 | 4 | PRAD | 10.12 | 0.0 | NA   | NA   |
| TCGA-G9-6333 | 6.982468 | 1.907775 | 2.907792 | 4 | 4 | PRAD | 80.98 | 0.0 | 58   | 2    |
| TCGA-YL-A8HK | 7.318805 | 2.460821 | 2.901396 | 4 | 4 | PRAD | 48.98 | 0.0 | NA   | NA   |
| TCGA-EJ-5509 | 7.530972 | 2.418268 | 2.861874 | 4 | 4 | PRAD | 48.09 | 0.0 | 36   | 7    |
| TCGA-G9-6329 | 7.297078 | 2.837641 | 2.837641 | 4 | 4 | PRAD | 41.59 | 0.0 | 21   | 6    |
| TCGA-J9-A8CK | 7.086781 | 2.047259 | 2.784211 | 4 | 4 | PRAD | 10.55 | 0.0 | NA   | NA   |
| TCGA-G9-7510 | 7.420369 | 1.958286 | 2.765641 | 4 | 4 | PRAD | 38.93 | 0.0 | 36   | 3    |
| TCGA-J4-AATV | 7.179005 | 3.400797 | 2.756936 | 4 | 4 | PRAD | 18.17 | 0.0 | NA   | NA   |

|              |          |          |          |   |   |      |       |     |     |    |
|--------------|----------|----------|----------|---|---|------|-------|-----|-----|----|
| TCGA-YL-A8SK | 7.355600 | 2.252779 | 2.700240 | 4 | 4 | PRAD | 46.25 | 0.0 | NA  | NA |
| TCGA-EJ-A8FO | 7.514070 | 2.284336 | 2.671361 | 4 | 4 | PRAD | 9.26  | 0.0 | NA  | NA |
| TCGA-VP-AA1N | 6.656505 | 2.326218 | 2.667277 | 4 | 4 | PRAD | 44.84 | 0.0 | NA  | NA |
| TCGA-FC-A66V | 7.261453 | 1.359352 | 2.622413 | 4 | 4 | PRAD | 17.21 | 0.0 | 8   | 1  |
| TCGA-V1-A9O7 | 7.159804 | 3.300225 | 2.515937 | 4 | 4 | PRAD | 82.10 | 0.0 | NA  | NA |
| TCGA-ZG-A9L2 | 7.549532 | 2.779008 | 2.498912 | 4 | 4 | PRAD | 37.91 | 0.0 | NA  | NA |
| TCGA-ZG-A9LB | 6.709886 | 1.876994 | 2.461945 | 4 | 4 | PRAD | 19.15 | 0.0 | NA  | NA |
| TCGA-HC-7740 | 7.291606 | 1.926265 | 2.456777 | 4 | 4 | PRAD | 23.55 | 0.0 | 45  | 11 |
| TCGA-V1-A9OX | 7.213711 | 1.669662 | 2.406616 | 4 | 4 | PRAD | 37.25 | 0.0 | NA  | NA |
| TCGA-KK-A59Z | 6.587607 | 2.671995 | 2.382501 | 4 | 4 | PRAD | 86.33 | 0.0 | 51  | 11 |
| TCGA-YL-A8SF | 7.234723 | 2.222465 | 2.348003 | 4 | 4 | PRAD | 45.11 | 0.0 | NA  | NA |
| TCGA-G9-6336 | 7.082204 | 1.824234 | 2.338792 | 4 | 4 | PRAD | 67.94 | 0.0 | 21  | 4  |
| TCGA-EJ-7330 | 7.367591 | 1.632124 | 2.310224 | 4 | 4 | PRAD | 6.27  | 0.0 | 104 | 16 |
| TCGA-EJ-5501 | 7.275807 | 1.886121 | 2.278461 | 4 | 4 | PRAD | 44.84 | 0.0 | 19  | 5  |
| TCGA-EJ-5532 | 7.397165 | 1.860764 | 2.275782 | 4 | 4 | PRAD | 60.05 | 0.0 | 29  | 4  |
| TCGA-EJ-A7NG | 7.371698 | 2.271273 | 2.271273 | 4 | 4 | PRAD | 14.19 | 0.0 | NA  | NA |
| TCGA-VP-A872 | 7.382395 | 1.575409 | 2.253475 | 4 | 4 | PRAD | ####  | 0.0 | NA  | NA |
| TCGA-XK-AAJT | 7.452939 | 2.220265 | 2.220265 | 4 | 4 | PRAD | 47.11 | 0.0 | NA  | NA |
| TCGA-H9-7775 | 7.396407 | 1.215051 | 2.215085 | 4 | 4 | PRAD | 6.08  | 0.0 | 30  | 10 |
| TCGA-YL-A8SJ | 7.474501 | 1.751507 | 2.166519 | 4 | 4 | PRAD | 45.83 | 0.0 | NA  | NA |
| TCGA-V1-A8WN | 7.399151 | 1.117429 | 2.117426 | 4 | 4 | PRAD | 30.35 | 0.0 | NA  | NA |
| TCGA-XK-AAIR | 7.076167 | 2.358984 | 2.095958 | 4 | 4 | PRAD | 31.93 | 0.0 | NA  | NA |
| TCGA-G9-6338 | 6.441068 | 4.677305 | 2.092343 | 4 | 4 | PRAD | 66.62 | 0.0 | 29  | 5  |
| TCGA-KK-A8IM | 7.217305 | 1.755140 | 2.077072 | 4 | 4 | PRAD | 62.91 | 0.0 | NA  | NA |
| TCGA-KK-A7B3 | 7.515454 | 1.939524 | 2.077038 | 4 | 4 | PRAD | 29.53 | 0.0 | NA  | NA |
| TCGA-EJ-5502 | 7.534564 | 2.540275 | 2.066330 | 4 | 4 | PRAD | 38.47 | 0.0 | 16  | 1  |
| TCGA-G9-6356 | 7.320829 | 1.776525 | 2.066017 | 4 | 4 | PRAD | 47.11 | 0.0 | 62  | 9  |
| TCGA-EJ-A65B | 6.678713 | 1.342441 | 2.020481 | 4 | 4 | PRAD | 23.32 | 0.0 | 46  | 14 |
| TCGA-VP-A87E | 7.034144 | 3.602742 | 2.017776 | 4 | 4 | PRAD | 66.92 | 0.0 | NA  | NA |
| TCGA-KK-A8IG | 6.703852 | 2.678951 | 1.978525 | 4 | 4 | PRAD | 82.29 | 0.0 | NA  | NA |
| TCGA-EJ-7786 | 7.536822 | 2.093864 | 1.968345 | 4 | 4 | PRAD | 36.01 | 0.0 | 91  | 12 |
| TCGA-HC-7210 | 7.236743 | 1.539377 | 1.954416 | 4 | 4 | PRAD | 28.52 | 0.0 | 26  | 5  |
| TCGA-CH-5792 | 7.415431 | 2.212566 | 1.949531 | 4 | 4 | PRAD | 2.99  | 0.0 | 38  | 13 |
| TCGA-HC-A76W | 7.357938 | 2.101583 | 1.931679 | 4 | 4 | PRAD | 7.00  | 0.0 | NA  | NA |
| TCGA-VN-A88P | 6.745501 | 1.438080 | 1.923492 | 4 | 4 | PRAD | 41.39 | 0.0 | NA  | NA |
| TCGA-2A-A8VV | 7.095944 | 1.234624 | 1.912684 | 4 | 4 | PRAD | 22.04 | 0.0 | NA  | NA |
| TCGA-J4-8200 | 7.056356 | 1.896504 | 1.896504 | 4 | 4 | PRAD | 40.01 | 0.0 | 24  | 4  |
| TCGA-G9-6364 | 7.063998 | 2.285017 | 1.825582 | 4 | 4 | PRAD | 39.36 | 0.0 | 45  | 9  |
| TCGA-HC-A8D0 | 7.257426 | 2.684594 | 1.810110 | 4 | 4 | PRAD | 25.46 | 0.0 | NA  | NA |
| TCGA-YL-A9WX | 7.457488 | 2.471783 | 1.808838 | 4 | 4 | PRAD | 49.87 | 0.0 | NA  | NA |
| TCGA-YL-A8S8 | 6.981534 | 1.589663 | 1.782325 | 4 | 4 | PRAD | 62.09 | 0.0 | NA  | NA |
| TCGA-V1-A9Z7 | 7.097295 | 1.102181 | 1.780310 | 4 | 4 | PRAD | 28.71 | 0.0 | NA  | NA |
| TCGA-KK-A7B1 | 7.042915 | 1.917428 | 1.779928 | 4 | 4 | PRAD | 34.92 | 0.0 | NA  | NA |
| TCGA-EJ-7331 | 7.522396 | 1.760430 | 1.760430 | 4 | 4 | PRAD | 24.38 | 0.0 | 58  | 9  |
| TCGA-ZG-A8QX | 6.793355 | 2.416972 | 1.716552 | 4 | 4 | PRAD | 14.52 | 0.0 | NA  | NA |
| TCGA-XJ-A9DK | 7.341349 | 1.709904 | 1.709904 | 4 | 4 | PRAD | 9.03  | 0.0 | NA  | NA |
| TCGA-XA-A8JR | 7.112628 | 2.288654 | 1.703672 | 4 | 4 | PRAD | 12.35 | 0.0 | NA  | NA |
| TCGA-CH-5745 | 7.384244 | 3.833062 | 1.663162 | 4 | 4 | PRAD | 2.99  | 0.0 | 47  | 10 |
| TCGA-YL-A8SI | 7.022255 | 2.618521 | 1.618521 | 4 | 4 | PRAD | 53.02 | 0.0 | NA  | NA |
| TCGA-CH-5771 | 7.462981 | 2.843821 | 1.590094 | 4 | 4 | PRAD | 13.01 | 0.0 | 28  | 2  |
| TCGA-CH-5762 | 7.373680 | 1.570026 | 1.570026 | 4 | 4 | PRAD | 43.99 | 0.0 | 88  | 10 |
| TCGA-G9-6348 | 7.047064 | 1.357040 | 1.526970 | 4 | 4 | PRAD | 49.77 | 0.0 | 74  | 7  |
| TCGA-ZG-A9L9 | 7.170799 | 2.006618 | 1.521197 | 4 | 4 | PRAD | 20.27 | 0.0 | NA  | NA |
| TCGA-EJ-A7NJ | 7.375684 | 1.493130 | 1.493130 | 4 | 4 | PRAD | 6.47  | 0.0 | NA  | NA |

|              |          |          |          |   |   |      |       |     |     |    |
|--------------|----------|----------|----------|---|---|------|-------|-----|-----|----|
| TCGA-ZG-A9LM | 6.394838 | 1.894988 | 1.479955 | 4 | 4 | PRAD | 12.42 | 0.0 | NA  | NA |
| TCGA-CH-5789 | 7.249838 | 1.686518 | 1.464093 | 4 | 4 | PRAD | 9.99  | 0.0 | 16  | 6  |
| TCGA-HC-7737 | 7.190235 | 1.942304 | 1.427708 | 4 | 4 | PRAD | 35.81 | 0.0 | 33  | 7  |
| TCGA-KK-A7B0 | 6.650934 | 1.673642 | 1.410612 | 4 | 4 | PRAD | 43.66 | 0.0 | NA  | NA |
| TCGA-TK-A8OK | 7.300364 | 1.994866 | 1.409907 | 4 | 4 | PRAD | 0.89  | 0.0 | NA  | NA |
| TCGA-EJ-5506 | 7.009218 | 1.165809 | 1.358447 | 4 | 4 | PRAD | 45.37 | 0.0 | 15  | 1  |
| TCGA-XJ-A83H | 6.806707 | 1.652918 | 1.330954 | 4 | 4 | PRAD | 42.05 | 0.0 | NA  | NA |
| TCGA-HC-7213 | 6.949249 | 1.832404 | 1.317825 | 4 | 4 | PRAD | 40.05 | 0.0 | 45  | 10 |
| TCGA-EJ-A8FN | 7.505359 | 3.077395 | 1.311852 | 4 | 4 | PRAD | 10.81 | 0.0 | NA  | NA |
| TCGA-EJ-5499 | 7.004414 | 1.940505 | 1.288418 | 4 | 4 | PRAD | 46.48 | 0.0 | 40  | 6  |
| TCGA-HC-8258 | 7.181394 | 1.578644 | 1.256709 | 4 | 4 | PRAD | 27.83 | 0.0 | 24  | 6  |
| TCGA-V1-A9ZR | 7.566723 | 2.695237 | 1.235788 | 4 | 4 | PRAD | 44.71 | 0.0 | NA  | NA |
| TCGA-V1-A9OY | 7.421820 | 1.910499 | 1.232415 | 4 | 4 | PRAD | 35.05 | 0.0 | NA  | NA |
| TCGA-ZG-A9LN | 7.043927 | 2.489697 | 1.226626 | 4 | 4 | PRAD | 3.78  | 0.0 | NA  | NA |
| TCGA-M7-A71Y | 7.375029 | 1.780096 | 1.195096 | 4 | 4 | PRAD | 16.20 | 0.0 | NA  | NA |
| TCGA-EJ-7781 | 7.248027 | 1.971917 | 1.194276 | 4 | 4 | PRAD | 35.25 | 0.0 | 105 | 13 |
| TCGA-G9-6361 | 7.203999 | 2.178457 | 1.178485 | 4 | 4 | PRAD | 46.48 | 0.0 | 33  | 8  |
| TCGA-QU-A6IP | 7.401066 | 1.484602 | 1.162661 | 4 | 4 | PRAD | 86.07 | 0.0 | 21  | 6  |
| TCGA-EJ-5524 | 7.549680 | 1.146264 | 1.146264 | 4 | 4 | PRAD | 61.83 | 0.0 | 35  | 8  |
| TCGA-G9-6339 | 6.744897 | 1.444773 | 1.122871 | 4 | 4 | PRAD | 83.80 | 0.0 | 41  | 6  |
| TCGA-EJ-8474 | 7.139472 | 1.606963 | 1.121546 | 4 | 4 | PRAD | 25.16 | 0.0 | 99  | 8  |
| TCGA-V1-A8WV | 6.859898 | 1.698396 | 1.113434 | 4 | 4 | PRAD | 22.54 | 0.0 | NA  | NA |
| TCGA-EJ-7797 | 7.287533 | 1.502886 | 1.087863 | 4 | 4 | PRAD | 32.29 | 0.0 | 41  | 12 |
| TCGA-J4-A67N | 6.681527 | 2.403540 | 1.081612 | 4 | 4 | PRAD | 30.78 | 0.0 | 30  | 6  |
| TCGA-ZG-A8QY | 6.758456 | 2.212258 | 1.074773 | 4 | 4 | PRAD | 13.27 | 0.0 | NA  | NA |
| TCGA-G9-7525 | 7.127812 | 1.922693 | 1.074711 | 4 | 4 | PRAD | 32.65 | 0.0 | 49  | 14 |
| TCGA-V1-A8MJ | 7.337604 | 1.328607 | 1.006693 | 4 | 4 | PRAD | 58.84 | 0.0 | NA  | NA |
| TCGA-2A-A8VO | 6.902379 | 1.410612 | 0.995593 | 4 | 4 | PRAD | 55.88 | 0.0 | NA  | NA |
| TCGA-V1-A9O5 | 7.236058 | 1.953749 | 0.953749 | 4 | 4 | PRAD | 63.47 | 0.0 | NA  | NA |
| TCGA-J4-A6G3 | 7.356674 | 1.943059 | 0.943059 | 4 | 4 | PRAD | 27.89 | 0.0 | 24  | 2  |
| TCGA-KK-A6DY | 7.306673 | 1.420833 | 0.935384 | 4 | 4 | PRAD | ####  | 0.0 | 33  | 12 |
| TCGA-HC-7738 | 7.564791 | 1.795389 | 0.920903 | 4 | 4 | PRAD | 31.67 | 0.0 | 96  | 15 |
| TCGA-EJ-7325 | 6.916190 | 1.645651 | 0.908659 | 4 | 4 | PRAD | 35.15 | 0.0 | NA  | NA |
| TCGA-HC-7742 | 7.343753 | 2.585876 | 0.907814 | 4 | 4 | PRAD | 30.81 | 0.0 | 72  | 7  |
| TCGA-G9-6377 | 7.001841 | 1.391597 | 0.906198 | 4 | 4 | PRAD | 31.47 | 0.0 | 29  | 5  |
| TCGA-VP-A87H | 7.417474 | 1.211947 | 0.890019 | 4 | 4 | PRAD | 21.78 | 0.0 | NA  | NA |
| TCGA-HC-7817 | 7.251282 | 2.582074 | 0.881665 | 4 | 4 | PRAD | 30.49 | 0.0 | 27  | 6  |
| TCGA-KK-A6E5 | 7.188075 | 1.446621 | 0.861630 | 4 | 4 | PRAD | 68.10 | 0.0 | 21  | 5  |
| TCGA-V1-A9OH | 7.348123 | 1.276675 | 0.861630 | 4 | 4 | PRAD | 78.94 | 0.0 | NA  | NA |
| TCGA-Y6-A8TL | 7.441318 | 2.441560 | 0.856627 | 4 | 4 | PRAD | 32.59 | 0.0 | NA  | NA |
| TCGA-G9-6373 | 6.950106 | 1.597603 | 0.790272 | 4 | 4 | PRAD | 26.64 | 0.0 | 67  | 3  |
| TCGA-G9-6354 | 6.755921 | 1.771036 | 0.771032 | 4 | 4 | PRAD | 67.87 | 0.0 | 26  | 4  |
| TCGA-EJ-5494 | 7.139336 | 1.998557 | 0.676628 | 4 | 4 | PRAD | 48.52 | 0.0 | 35  | 11 |
| TCGA-CH-5794 | 7.548962 | 1.890754 | 0.627691 | 4 | 4 | PRAD | 28.98 | 0.0 | 36  | 6  |
| TCGA-VN-A88L | 7.171035 | 1.596744 | 0.596744 | 4 | 4 | PRAD | 24.51 | 0.0 | NA  | NA |
| TCGA-KK-A8IC | 6.783230 | 2.287913 | 0.587451 | 4 | 4 | PRAD | 67.38 | 0.0 | NA  | NA |
| TCGA-XK-AAJU | 6.969879 | 2.320655 | 0.583702 | 4 | 4 | PRAD | 51.77 | 0.0 | NA  | NA |
| TCGA-VP-A87D | 7.095599 | 2.446492 | 0.572007 | 4 | 4 | PRAD | 60.87 | 0.0 | NA  | NA |
| TCGA-HC-A6AN | 7.010676 | 1.784630 | 0.562172 | 4 | 4 | PRAD | 1.61  | 0.0 | 38  | 12 |
| TCGA-ZG-A9L0 | 7.021494 | 1.977093 | 0.562074 | 4 | 4 | PRAD | 11.66 | 0.0 | NA  | NA |
| TCGA-HC-7233 | 7.344383 | 1.665666 | 0.495787 | 4 | 4 | PRAD | 44.51 | 0.0 | 43  | 11 |
| TCGA-CH-5763 | 7.100973 | 1.881821 | 0.466747 | 4 | 4 | PRAD | 11.99 | 0.0 | 24  | 6  |
| TCGA-XQ-A8TB | 7.483901 | 2.050223 | 0.465295 | 4 | 4 | PRAD | 25.30 | 0.0 | NA  | NA |
| TCGA-EJ-5522 | 7.367097 | 1.251931 | 0.403911 | 4 | 4 | PRAD | 68.30 | 0.0 | 23  | 7  |



|              |          |          |          |   |   |      |       |     |     |    |
|--------------|----------|----------|----------|---|---|------|-------|-----|-----|----|
| TCGA-EJ-5515 | 7.399517 | 2.385014 | 0.385044 | 4 | 4 | PRAD | 60.18 | 0.0 | 31  | 4  |
| TCGA-KK-A6E0 | 6.854835 | 1.116099 | 0.379066 | 4 | 4 | PRAD | 48.72 | 0.0 | 27  | 9  |
| TCGA-EJ-7794 | 7.434109 | 2.460900 | 0.373398 | 4 | 4 | PRAD | 42.90 | 0.0 | 52  | 3  |
| TCGA-ZG-A9M4 | 7.125272 | 1.094777 | 0.357833 | 4 | 4 | PRAD | 17.97 | 0.0 | NA  | NA |
| TCGA-HC-7747 | 7.375219 | 2.046910 | 0.309991 | 4 | 4 | PRAD | 24.57 | 0.0 | 104 | 10 |
| TCGA-HC-7211 | 7.212502 | 1.560221 | 0.238298 | 4 | 4 | PRAD | 40.11 | 0.0 | 32  | 8  |
| TCGA-IB-AAUS | 8.9700   | 5.4943   | 3.9249   | 4 | 4 | PAAD | 7.39  | 0.0 | 52  | NA |
| TCGA-PZ-A5RE | 9.4267   | 5.3800   | 4.3067   | 4 | 4 | PAAD | 15.44 | 1.0 | 36  | NA |
| TCGA-IB-AAUV | 9.4765   | 5.0318   | 4.4284   | 4 | 4 | PAAD | 13.27 | 0.0 | NA  | NA |
| TCGA-2J-AABP | 8.3640   | 4.9559   | 1.0733   | 4 | 4 | PAAD | 15.21 | 0.0 | NA  | NA |
| TCGA-HZ-A77Q | 9.1945   | 4.7874   | 2.6922   | 4 | 4 | PAAD | 1.08  | 0.0 | 292 | NA |
| TCGA-HZ-7923 | 8.9670   | 4.6918   | 4.2393   | 4 | 4 | PAAD | 10.32 | 0.0 | NA  | NA |
| TCGA-RL-AAAS | 9.4265   | 4.6850   | 3.6850   | 4 | 4 | PAAD | 0.30  | 0.0 | NA  | NA |
| TCGA-IB-AAUR | 8.8088   | 4.6836   | 3.4946   | 4 | 4 | PAAD | 11.10 | 0.0 | 51  | NA |
| TCGA-HZ-8001 | 8.2493   | 4.5175   | 1.7102   | 4 | 4 | PAAD | 23.19 | 0.0 | 71  | NA |
| TCGA-XN-A8T5 | 8.6858   | 4.4232   | 3.6456   | 4 | 4 | PAAD | 23.65 | 0.0 | 66  | NA |
| TCGA-HZ-A49H | 9.5274   | 4.3183   | 3.6720   | 4 | 4 | PAAD | 16.13 | 0.0 | 36  | NA |
| TCGA-IB-7897 | 8.6093   | 4.3130   | 1.8536   | 4 | 4 | PAAD | 15.97 | 1.0 | 55  | NA |
| TCGA-IB-7652 | 9.5698   | 4.2542   | 5.4330   | 4 | 4 | PAAD | 36.66 | 0.0 | 107 | NA |
| TCGA-XD-AAUH | 8.7303   | 4.1025   | 1.8655   | 4 | 4 | PAAD | 12.98 | 0.0 | 37  | NA |
| TCGA-US-A77J | 8.7830   | 4.0919   | 2.6065   | 4 | 4 | PAAD | 18.66 | 1.0 | NA  | NA |
| TCGA-US-A774 | 9.4356   | 4.0375   | 1.7521   | 4 | 4 | PAAD | 22.83 | 1.0 | 93  | NA |
| TCGA-3A-A9IX | 9.5116   | 4.0299   | 2.0299   | 4 | 4 | PAAD | 34.07 | 0.0 | 51  | NA |
| TCGA-HZ-7920 | 8.3296   | 3.9408   | 1.6481   | 4 | 4 | PAAD | 7.75  | 1.0 | NA  | NA |
| TCGA-FB-A5VM | 7.8909   | 3.8685   | 3.3831   | 4 | 4 | PAAD | 16.36 | 1.0 | 81  | NA |
| TCGA-2J-AABT | 9.1745   | 3.7832   | 2.3237   | 4 | 4 | PAAD | 10.48 | 0.0 | NA  | NA |
| TCGA-IB-A5ST | 9.0291   | 3.7595   | 1.8053   | 4 | 4 | PAAD | 20.86 | 0.0 | 79  | NA |
| TCGA-FB-A4P5 | 9.2118   | 3.7087   | 1.8606   | 4 | 4 | PAAD | 5.88  | 1.0 | 45  | NA |
| TCGA-HZ-A77P | 8.9332   | 3.6615   | 4.6831   | 4 | 4 | PAAD | 10.84 | 0.0 | 59  | NA |
| TCGA-HV-A5A5 | 9.5685   | 3.6007   | 1.5303   | 4 | 4 | PAAD | 9.49  | 0.0 | 38  | NA |
| TCGA-HV-AA8V | 9.3337   | 3.5409   | 0.9560   | 4 | 4 | PAAD | 30.22 | 0.0 | 45  | NA |
| TCGA-HZ-A4BH | 9.6121   | 3.5260   | 1.9410   | 4 | 4 | PAAD | 6.37  | 0.0 | 75  | NA |
| TCGA-IB-AAUP | 9.2195   | 3.5160   | 1.4005   | 4 | 4 | PAAD | 14.16 | 0.0 | 78  | NA |
| TCGA-HZ-8317 | 9.5404   | 3.4873   | 2.4873   | 4 | 4 | PAAD | 12.42 | 1.0 | 67  | NA |
| TCGA-FB-A4P6 | 9.4344   | 3.4462   | 2.2535   | 4 | 4 | PAAD | 25.20 | 0.0 | 23  | NA |
| TCGA-IB-7649 | 9.1990   | 3.4452   | 2.4452   | 4 | 4 | PAAD | 15.34 | 1.0 | 157 | NA |
| TCGA-S4-A8RO | 9.3516   | 3.3343   | 4.5973   | 4 | 4 | PAAD | 17.25 | 0.0 | 75  | NA |
| TCGA-2J-AAB6 | 7.7496   | 3.3135   | 1.2260   | 4 | 4 | PAAD | 9.63  | 1.0 | 85  | NA |
| TCGA-HZ-A4BK | 9.6529   | 3.1955   | 6.5098   | 4 | 4 | PAAD | 21.58 | 0.0 | 65  | NA |
| TCGA-XD-AAUC | 8.8453   | 3.1348   | 2.7563   | 4 | 4 | PAAD | 13.80 | 0.0 | 37  | NA |
| TCGA-2J-AABE | 8.7487   | 3.1098   | 6.1851   | 4 | 4 | PAAD | 22.21 | 0.0 | 51  | NA |
| TCGA-2J-AABR | 9.6898   | 3.0071   | 1.6286   | 4 | 4 | PAAD | 14.39 | 0.0 | 40  | NA |
| TCGA-3A-A9I9 | 9.3902   | 2.9877   | 4.9352   | 4 | 4 | PAAD | 20.83 | 1.0 | 107 | NA |
| TCGA-Q3-AA2A | 9.2238   | 2.9875   | 2.5280   | 4 | 4 | PAAD | 3.12  | 0.0 | 54  | NA |
| TCGA-FB-AAPS | 8.9250   | 2.9234   | 1.4639   | 4 | 4 | PAAD | 7.49  | 0.0 | 59  | NA |
| TCGA-F2-6880 | 8.7844   | 2.8805   | 2.2956   | 4 | 4 | PAAD | 9.69  | 0.0 | NA  | NA |
| TCGA-HZ-A49G | 9.4276   | 2.8302   | 5.3196   | 4 | 4 | PAAD | 21.68 | 0.0 | 46  | NA |
| TCGA-IB-8127 | 9.2054   | 2.8060   | 5.3365   | 4 | 4 | PAAD | 17.15 | 0.0 | 60  | NA |
| TCGA-3A-A9J0 | 9.6384   | 2.7794   | 2.0790   | 4 | 4 | PAAD | 24.41 | 0.0 | 89  | NA |
| TCGA-3A-A9IB | 9.2137   | 2.7767   | 1.8591   | 4 | 4 | PAAD | 7.36  | 1.0 | 79  | NA |
| TCGA-HZ-8315 | 9.1443   | 2.6864   | 2.5058   | 4 | 4 | PAAD | 9.82  | 1.0 | 65  | NA |
| TCGA-HZ-8519 | 9.3056   | 2.6616   | 2.2465   | 4 | 4 | PAAD | 14.91 | 0.0 | 38  | NA |
| TCGA-Z5-AAPL | 8.6060   | 2.6480   | 1.5105   | 4 | 4 | PAAD | 15.34 | 0.0 | 50  | NA |
| TCGA-YB-A89D | 9.2162   | 2.6245   | 1.0395   | 4 | 4 | PAAD | 11.50 | 0.0 | 209 | NA |

|              |          |          |           |   |   |      |     |     |      |    |
|--------------|----------|----------|-----------|---|---|------|-----|-----|------|----|
| TCGA-BQ-5882 | 7.863128 | 6.013808 | 4.414562  | 4 | 4 | KIRP | 22  | 1.0 | 51   | 12 |
| TCGA-B1-A656 | 7.884919 | 5.176897 | 2.687509  | 4 | 4 | KIRP | 20  | 0.0 | 83   | 32 |
| TCGA-GL-A59T | 7.971846 | 4.774439 | 0.073957  | 4 | 4 | KIRP | 18  | 0.0 | NA   | 24 |
| TCGA-5P-A9K2 | 7.225111 | 4.529965 | 0.137635  | 4 | 4 | KIRP | 79  | 0.0 | NA   | NA |
| TCGA-BQ-5887 | 7.273555 | 4.108223 | -1.351074 | 4 | 4 | KIRP | 25  | 0.0 | 20   | 4  |
| TCGA-2Z-A9JT | 7.759496 | 3.871971 | 0.550014  | 4 | 4 | KIRP | 22  | 0.0 | NA   | NA |
| TCGA-F9-A97G | 6.822561 | 3.822557 | -1.177588 | 4 | 4 | KIRP | 0   | 0.0 | 27   | NA |
| TCGA-2Z-A9JD | 7.458037 | 3.696749 | 0.052833  | 4 | 4 | KIRP | 35  | 0.0 | NA   | NA |
| TCGA-A4-A5Y1 | 7.738467 | 3.468139 | 0.660746  | 4 | 4 | KIRP | 13  | 1.0 | 49   | 24 |
| TCGA-2Z-A9JJ | 8.002634 | 3.228634 | -0.415230 | 4 | 4 | KIRP | 40  | 0.0 | NA   | NA |
| TCGA-2Z-A9J1 | 7.601447 | 3.157173 | -0.012766 | 4 | 4 | KIRP | 75  | 0.0 | NA   | NA |
| TCGA-DW-7840 | 7.980954 | 3.062087 | 1.383995  | 4 | 4 | KIRP | 4   | 0.0 | 47   | 19 |
| TCGA-SX-A71W | 7.246096 | 2.985027 | 0.461424  | 4 | 4 | KIRP | 35  | 0.0 | NA   | NA |
| TCGA-MH-A856 | 7.494492 | 2.937871 | -0.384038 | 4 | 4 | KIRP | 31  | 0.0 | NA   | NA |
| TCGA-GL-A59R | 7.848127 | 2.542307 | -0.627716 | 4 | 4 | KIRP | 12  | 0.0 | 155  | 25 |
| TCGA-HE-A5NJ | 7.005910 | 2.527871 | 0.720532  | 4 | 4 | KIRP | 57  | 0.0 | 87   | 13 |
| TCGA-F9-A7VF | 7.642821 | 2.488052 | -0.511896 | 4 | 4 | KIRP | 2   | 0.0 | NA   | NA |
| TCGA-BQ-7044 | 7.594115 | 2.481557 | 0.159629  | 4 | 4 | KIRP | 124 | 0.0 | 38   | 14 |
| TCGA-PJ-A5Z8 | 7.799098 | 2.479722 | 0.392207  | 4 | 4 | KIRP | 20  | 0.0 | 59   | 28 |
| TCGA-F9-A7Q0 | 7.394607 | 2.474669 | -0.984816 | 4 | 4 | KIRP | 13  | 0.0 | NA   | NA |
| TCGA-2Z-A9JP | 7.834178 | 2.396762 | -0.773270 | 4 | 4 | KIRP | 29  | 0.0 | NA   | NA |
| TCGA-2Z-A9J1 | 7.828186 | 2.393553 | -0.191327 | 4 | 4 | KIRP | 51  | 0.0 | NA   | NA |
| TCGA-DW-7836 | 8.171309 | 2.368153 | -1.332426 | 4 | 4 | KIRP | 36  | 0.0 | 23   | NA |
| TCGA-P4-A5E8 | 2.358453 | 2.358452 | 1.136060  | 4 | 4 | KIRP | 43  | 1.0 | 78   | 17 |
| TCGA-AT-A5NU | 7.465777 | 2.324753 | -1.067636 | 4 | 4 | KIRP | 2   | 0.0 | 85   | 21 |
| TCGA-EV-5902 | 7.522086 | 2.324321 | -0.845572 | 4 | 4 | KIRP | 19  | 0.0 | 98   | 18 |
| TCGA-PJ-A5Z9 | 7.664215 | 2.176961 | -0.630394 | 4 | 4 | KIRP | 18  | 0.0 | #N/A | 12 |
| TCGA-BQ-5883 | 7.732446 | 2.152637 | -0.069770 | 4 | 4 | KIRP | 41  | 0.0 | 48   | 6  |
| TCGA-G7-6795 | 7.833111 | 2.101784 | 2.101781  | 4 | 4 | KIRP | 39  | 0.0 | 47   | 12 |
| TCGA-GL-6846 | 7.964606 | 2.097307 | -0.018147 | 4 | 4 | KIRP | 195 | 0.0 | 103  | 13 |
| TCGA-Q2-A5QZ | 8.093940 | 2.087531 | 0.280113  | 4 | 4 | KIRP | 14  | 0.0 | NA   | 25 |
| TCGA-SX-A7SR | 7.495406 | 1.987976 | -1.012170 | 4 | 4 | KIRP | 26  | 0.0 | NA   | NA |
| TCGA-WN-A9G5 | 7.925187 | 1.948975 | 0.364001  | 4 | 4 | KIRP | 26  | 0.0 | NA   | NA |
| TCGA-G7-7502 | 7.679204 | 1.844024 | 0.384602  | 4 | 4 | KIRP | 26  | 0.0 | 40   | 17 |
| TCGA-P4-AAVK | 7.966740 | 1.828509 | -1.341537 | 4 | 4 | KIRP | 52  | 0.0 | 102  | NA |
| TCGA-AL-7173 | 7.638177 | 1.771927 | 2.186973  | 4 | 4 | KIRP | 68  | 0.0 | 179  | 19 |
| TCGA-P4-A5E7 | 7.789451 | 1.689075 | -0.310969 | 4 | 4 | KIRP | 87  | 0.0 | 140  | 18 |
| TCGA-EV-5903 | 8.142269 | 1.670161 | -0.499810 | 4 | 4 | KIRP | 25  | 0.0 | NA   | 29 |
| TCGA-B9-4114 | 7.933533 | 1.601316 | 0.378955  | 4 | 4 | KIRP | 28  | 0.0 | 25   | 21 |
| TCGA-A4-7585 | 7.653479 | 1.492365 | -1.315127 | 4 | 4 | KIRP | 35  | 1.0 | 167  | 20 |
| TCGA-B9-4115 | 8.078106 | 1.445144 | -1.554739 | 4 | 4 | KIRP | 26  | 0.0 | 79   | 13 |
| TCGA-AL-3473 | 7.850216 | 1.237869 | -1.569650 | 4 | 4 | KIRP | 63  | 0.0 | 72   | 20 |
| TCGA-MH-A854 | 7.522155 | 1.188274 | -0.396688 | 4 | 4 | KIRP | 18  | 0.0 | NA   | NA |
| TCGA-SX-A7SS | 6.588113 | 1.128689 | 1.128683  | 4 | 4 | KIRP | 53  | 0.0 | NA   | NA |
| TCGA-J7-6720 | 8.108950 | 1.084336 | 0.347439  | 4 | 4 | KIRP | 13  | 0.0 | 151  | 11 |
| TCGA-B9-A69E | 7.872219 | 0.723078 | 0.308011  | 4 | 4 | KIRP | 15  | 0.0 | NA   | 21 |
| TCGA-IZ-A6M9 | 7.598213 | 0.568421 | 0.983532  | 4 | 4 | KIRP | 12  | 0.0 | 31   | 17 |
| TCGA-DW-5560 | 8.000168 | 0.430284 | 1.430339  | 4 | 4 | KIRP | 49  | 0.0 | 44   | 8  |
| TCGA-AL-3472 | 7.021606 | 0.363339 | 2.778440  | 4 | 4 | KIRP | 67  | 0.0 | 66   | 11 |
| TCGA-HE-A5NI | 7.609640 | 0.158466 | 1.158402  | 4 | 4 | KIRP | 12  | 0.0 | 58   | 28 |
| TCGA-SL-A6J9 | 7.6519   | 3.8446   | -0.5129   | 4 | 4 | UCEC | 7   | 0   | NA   | NA |
| TCGA-AJ-A8CV | 7.3310   | 3.7079   | -0.0994   | 4 | 4 | UCEC | 35  | 0   | NA   | NA |
| TCGA-EY-A1GP | 6.9254   | 6.0128   | 4.5103    | 4 | 4 | UCEC | 19  | 0   | NA   | NA |
| TCGA-DI-A2QY | 6.8365   | 3.8090   | 0.1086    | 4 | 4 | UCEC | 110 | 1   | NA   | NA |

|              |        |        |         |   |   |       |      |     |      |      |
|--------------|--------|--------|---------|---|---|-------|------|-----|------|------|
| TCGA-D1-A3JQ | 6.7257 | 4.9076 | 0.0831  | 4 | 4 | UCEC  | 17   | 0   | NA   | NA   |
| TCGA-QS-A5YC | 6.5461 | 4.7431 | 0.1885  | 4 | 4 | UCEC  | 25   | 0   | NA   | NA   |
| TCGA-B5-A3FD | 6.5080 | 4.5627 | 0.5931  | 4 | 4 | UCEC  | 39   | 1   | NA   | NA   |
| TCGA-SJ-A6ZJ | 6.1560 | 3.4012 | 0.4012  | 4 | 4 | UCEC  | 18   | 0   | NA   | NA   |
| TCGA-BS-A0V4 | 5.8695 | 3.4772 | 1.4772  | 4 | 4 | UCEC  | 59   | 0   | NA   | NA   |
| TCGA-EO-A22Y | 5.5522 | 4.8882 | -0.2411 | 4 | 4 | UCEC  | 51   | 0   | NA   | NA   |
| TCGA-AZ-4323 | #####  | #####  | #####   | 4 | 4 | Colon | 1    | 1.0 | 15   | NA   |
| TCGA-CM-5348 | #####  | #####  | #####   | 4 | 4 | Colon | 23   | 0.0 | 51   | NA   |
| TCGA-AA-3662 | #####  | #####  | #####   | 4 | 4 | Colon | 6    | 0.0 | 115  | NA   |
| TCGA-CM-6167 | #####  | #####  | #####   | 4 | 4 | Colon | 15   | 0.0 | NA   | NA   |
| TCGA-A6-6651 | #####  | #####  | #####   | 4 | 4 | Colon | 22   | 0.0 | 47   | NA   |
| TCGA-A6-2685 | #####  | #####  | #####   | 4 | 4 | Colon | 37   | 0.0 | NA   | NA   |
| TCGA-A6-2671 | #####  | #####  | #####   | 4 | 4 | Colon | 44   | 1.0 | #N/A | #N/A |
| TCGA-AA-3672 | #####  | #####  | #####   | 4 | 4 | Colon | 1    | 0.0 | #N/A | #N/A |
| TCGA-AA-3696 | #####  | #####  | #####   | 4 | 4 | Colon | 5    | 1.0 | #N/A | #N/A |
| TCGA-AA-3715 | #####  | #####  | #####   | 4 | 4 | Colon | 19   | 1.0 | #N/A | #N/A |
| TCGA-AA-3812 | #####  | #####  | #####   | 4 | 4 | Colon | 35   | 0.0 | #N/A | #N/A |
| TCGA-AA-A01X | #####  | #####  | #####   | 4 | 4 | Colon | 26   | 0.0 | NA   | NA   |
| TCGA-A6-2684 | #####  | #####  | #####   | 4 | 4 | Colon | 37   | 0.0 | NA   | NA   |
| TCGA-AA-3511 | #####  | #####  | #####   | 4 | 4 | Colon | 7    | 0.0 | 51   | NA   |
| TCGA-G4-6628 | #####  | #####  | #####   | 4 | 4 | Colon | 80   | 0.0 | 736  | NA   |
| TCGA-D5-6536 | #####  | #####  | #####   | 4 | 4 | Colon | 18   | 0.0 | 43   | NA   |
| TCGA-AA-3841 | #####  | #####  | #####   | 4 | 4 | Colon | 37   | 0.0 | #N/A | #N/A |
| TCGA-CM-5864 | #####  | #####  | #####   | 4 | 4 | Colon | 15   | 0.0 | 84   | NA   |
| TCGA-A6-6654 | #####  | #####  | #####   | 4 | 4 | Colon | 24   | 0.0 | 57   | NA   |
| TCGA-CM-4747 | #####  | #####  | #####   | 4 | 4 | Colon | 25   | 0.0 | 29   | NA   |
| TCGA-F4-6703 | #####  | #####  | #####   | 4 | 4 | Colon | 48   | 0.0 | 150  | NA   |
| TCGA-CM-6163 | #####  | #####  | #####   | 4 | 4 | Colon | 14   | 0.0 | 28   | NA   |
| TCGA-A6-3807 | #####  | #####  | #####   | 4 | 4 | Colon | 35   | 0.0 | #N/A | #N/A |
| TCGA-AZ-4313 | #####  | #####  | #####   | 4 | 4 | Colon | 76   | 0.0 | NA   | NA   |
| TCGA-G4-6297 | #####  | #####  | #####   | 4 | 4 | Colon | 82   | 0.0 | 90   | NA   |
| TCGA-A6-2681 | #####  | #####  | #####   | 4 | 4 | Colon | 46   | 0.0 | #N/A | #N/A |
| TCGA-A6-6782 | #####  | #####  | #####   | 4 | 4 | Colon | 20   | 0.0 | 58   | NA   |
| TCGA-AA-3971 | #####  | #####  | #####   | 4 | 4 | Colon | 16   | 0.0 | #N/A | #N/A |
| TCGA-AA-3660 | #####  | #####  | #####   | 4 | 4 | Colon | 78   | 0.0 | 56   | NA   |
| TCGA-AA-3489 | #####  | #####  | #####   | 4 | 4 | Colon | 7    | 1.0 | 33   | NA   |
| TCGA-A6-2675 | #####  | #####  | #####   | 4 | 4 | Colon | 43   | 0.0 | 21   | NA   |
| TCGA-AY-4070 | #####  | #####  | #####   | 4 | 4 | Colon | 16   | 1.0 | #N/A | #N/A |
| TCGA-F4-6460 | #####  | #####  | #####   | 4 | 4 | Colon | 32   | 1.0 | 44   | NA   |
| TCGA-CM-6678 | #####  | #####  | #####   | 4 | 4 | Colon | 11   | 0.0 | 50   | NA   |
| TCGA-CA-6719 | #####  | #####  | #####   | 4 | 4 | Colon | 14   | 0.0 | 43   | NA   |
| TCGA-AA-3856 | #####  | #####  | #####   | 4 | 4 | Colon | 1    | 0.0 | #N/A | #N/A |
| TCGA-AA-3979 | #####  | #####  | #####   | 4 | 4 | Colon | 24   | 0.0 | #N/A | #N/A |
| TCGA-AU-3779 | #####  | #####  | #####   | 4 | 4 | Colon | 14   | 0.0 | 36   | NA   |
| TCGA-D5-6924 | #####  | #####  | #####   | 4 | 4 | Colon | 14   | 0.0 | 62   | NA   |
| TCGA-AA-3870 | #####  | #####  | #####   | 4 | 4 | Colon | 30   | 0.0 | #N/A | #N/A |
| TCGA-AA-3693 | #####  | #####  | #####   | 4 | 4 | Colon | 0    | 0.0 | #N/A | #N/A |
| TCGA-AA-3685 | #####  | #####  | #####   | 4 | 4 | Colon | 37   | 0.0 | NA   | 12   |
| TCGA-AD-6964 | #####  | #####  | #####   | 4 | 4 | Colon | 11   | 1.0 | 507  | NA   |
| TCGA-CA-5255 | #####  | #####  | #####   | 4 | 4 | Colon | 12   | 0.0 | NA   | NA   |
| TCGA-AA-3972 | #####  | #####  | #####   | 4 | 4 | Colon | 51   | 0.0 | #N/A | #N/A |
| TCGA-3L-AA1B | #####  | #####  | #####   | 4 | 4 | Colon | #### | 0.0 | NA   | NA   |
| TCGA-CM-6676 | #####  | #####  | #####   | 4 | 4 | Colon | 11   | 0.0 | 32   | NA   |
| TCGA-F4-6459 | #####  | #####  | #####   | 4 | 4 | Colon | 9    | 1.0 | 46   | NA   |

|              |       |       |       |   |        |       |     |     |      |      |
|--------------|-------|-------|-------|---|--------|-------|-----|-----|------|------|
| TCGA-AA-A01C | ##### | ##### | ##### | 4 | 4      | Colon | 15  | 0.0 | #N/A | #N/A |
| TCGA-F4-6807 | ##### | ##### | ##### | 4 | 4      | Colon | 43  | 0.0 | 61   | NA   |
| TCGA-AA-A00D | ##### | ##### | ##### | 4 | 4      | Colon | 19  | 0.0 | #N/A | #N/A |
| TCGA-AZ-6603 | ##### | ##### | ##### | 4 | 4      | Colon | 30  | 1.0 | 40   | NA   |
| TCGA-AY-6196 | ##### | ##### | ##### | 4 | 4      | Colon | 0   | 0.0 | 120  | NA   |
| TCGA-AA-3684 | ##### | ##### | ##### | 4 | 4      | Colon | 0   | 0.0 | #N/A | #N/A |
| TCGA-AA-A01D | ##### | ##### | ##### | 4 | 4      | Colon | 11  | 1.0 | #N/A | #N/A |
| TCGA-D5-6928 | ##### | ##### | ##### | 4 | 4      | Colon | 12  | 0.0 | 631  | NA   |
| TCGA-CA-6717 | ##### | ##### | ##### | 4 | 4      | Colon | 13  | 0.0 | 2866 | NA   |
| TCGA-WS-AB4E | ##### | ##### | ##### | 4 | 4      | Colon | 70  | 0.0 | NA   | NA   |
| TCGA-G4-6302 | ##### | ##### | ##### | 4 | 4      | Colon | 67  | 1.0 | 344  | NA   |
| TCGA-F4-6463 | ##### | ##### | ##### | 4 | 4      | Colon | 36  | 0.0 | 76   | NA   |
| TCGA-AD-5900 | ##### | ##### | ##### | 4 | 4      | Colon | 12  | 0.0 | 593  | NA   |
| TCGA-AA-3852 | ##### | ##### | ##### | 4 | 4      | Colon | 0   | 1.0 | #N/A | #N/A |
| TCGA-EI-6917 | ##### | ##### | #NUM! | 1 | #NULL! | READ  | 17  | 0.0 | 7320 | NA   |
| TCGA-AG-A02N | ##### | ##### | ##### | 1 | #NULL! | READ  | 62  | 0.0 | 1686 | #N/A |
| TCGA-F5-6811 | ##### | ##### | #NUM! | 1 | #NULL! | READ  | 32  | 0.0 | 130  | NA   |
| TCGA-G5-6233 | ##### | ##### | ##### | 1 | #NULL! | READ  | 18  | 1.0 | 0    | NA   |
| TCGA-AG-A008 | ##### | ##### | ##### | 1 | #NULL! | READ  | 14  | 0.0 | 105  | #N/A |
| TCGA-EI-7002 | ##### | ##### | ##### | 1 | #NULL! | READ  | 12  | 0.0 | 232  | NA   |
| TCGA-EF-5831 | ##### | ##### | #NUM! | 1 | #NULL! | READ  | 4   | 0.0 | 0    | NA   |
| TCGA-DY-A1DC | ##### | ##### | #NUM! | 1 | #NULL! | READ  | 51  | 1.0 | 239  | NA   |
| TCGA-AG-3726 | ##### | ##### | ##### | 1 | #NULL! | READ  | 8   | 0.0 | 206  | #N/A |
| TCGA-CL-5918 | ##### | #NUM! | ##### | 1 | #NULL! | READ  | 7   | 0.0 | 188  | NA   |
| TCGA-AH-6903 | ##### | ##### | ##### | 1 | #NULL! | READ  | 19  | 0.0 | 106  | NA   |
| TCGA-AG-3725 | ##### | ##### | ##### | 1 | #NULL! | READ  | 21  | 0.0 | 131  | NA   |
| TCGA-AG-A016 | ##### | ##### | ##### | 1 | #NULL! | READ  | 9   | 0.0 | 128  | #N/A |
| TCGA-AG-A01L | ##### | ##### | ##### | 1 | #NULL! | READ  | 0   | 0.0 | 92   | #N/A |
| TCGA-G5-6235 | ##### | ##### | #NUM! | 1 | #NULL! | READ  | 56  | 0.0 | 0    | NA   |
| TCGA-EF-5830 | ##### | ##### | #NUM! | 1 | #NULL! | READ  | 3   | 0.0 | 100  | NA   |
| TCGA-AF-5654 | ##### | ##### | ##### | 1 | #NULL! | READ  | 17  | 1.0 | 367  | NA   |
| TCGA-AG-3583 | ##### | ##### | ##### | 1 | #NULL! | READ  | 20  | 1.0 | 32   | #N/A |
| TCGA-AG-3578 | ##### | ##### | ##### | 1 | #NULL! | READ  | 32  | 0.0 | 0    | #N/A |
| TCGA-CI-6623 | ##### | ##### | #NUM! | 1 | #NULL! | READ  | 47  | 0.0 | 110  | NA   |
| TCGA-AG-A020 | ##### | ##### | ##### | 1 | #NULL! | READ  | 1   | 0.0 | 120  | #N/A |
| TCGA-DC-6682 | ##### | ##### | #NUM! | 1 | #NULL! | READ  | 25  | 0.0 | 198  | NA   |
| TCGA-DY-A1DE | ##### | ##### | #NUM! | 1 | #NULL! | READ  | 129 | 0.0 | 0    | NA   |
| TCGA-AG-A02X | ##### | ##### | ##### | 1 | #NULL! | READ  | 41  | 0.0 | 196  | #N/A |
| TCGA-AG-3898 | ##### | ##### | ##### | 1 | #NULL! | READ  | 48  | 0.0 | 160  | #N/A |
| TCGA-CI-6622 | ##### | ##### | ##### | 1 | #NULL! | READ  | 45  | 0.0 | 158  | NA   |
| TCGA-F5-6813 | ##### | ##### | ##### | 1 | #NULL! | READ  | 20  | 1.0 | 183  | NA   |
| TCGA-EI-6512 | ##### | ##### | ##### | 1 | #NULL! | READ  | 18  | 0.0 | 184  | NA   |
| TCGA-DC-6683 | ##### | ##### | #NUM! | 1 | #NULL! | READ  | 25  | 0.0 | 103  | NA   |
| TCGA-DC-6160 | ##### | ##### | ##### | 1 | #NULL! | READ  | 44  | 0.0 | 117  | NA   |
| TCGA-AG-A01Y | ##### | ##### | ##### | 1 | #NULL! | READ  | 0   | 0.0 | 118  | #N/A |
| TCGA-DC-6157 | ##### | ##### | #NUM! | 1 | #NULL! | READ  | 52  | 0.0 | 136  | NA   |
| TCGA-AF-3913 | ##### | ##### | ##### | 1 | #NULL! | READ  | 10  | 1.0 | 0    | #N/A |
| TCGA-AG-A01W | ##### | ##### | ##### | 1 | #NULL! | READ  | 0   | 0.0 | 196  | #N/A |
| TCGA-EI-6882 | ##### | ##### | #NUM! | 1 | #NULL! | READ  | 9   | 0.0 | 1874 | NA   |
| TCGA-AH-6897 | ##### | ##### | ##### | 1 | #NULL! | READ  | 26  | 0.0 | 153  | NA   |
| TCGA-DY-A1DF | ##### | #NUM! | ##### | 2 | #NULL! | READ  | 24  | 1.0 | 187  | NA   |
| TCGA-DY-A1DD | ##### | ##### | ##### | 2 | #NULL! | READ  | 57  | 1.0 | 182  | NA   |
| TCGA-AG-3611 | ##### | ##### | ##### | 2 | #NULL! | READ  | 14  | 0.0 | 0    | #N/A |
| TCGA-EI-6509 | ##### | ##### | #NUM! | 2 | #NULL! | READ  | 17  | 0.0 | 81   | NA   |

|              |       |       |       |   |        |      |     |     |       |      |
|--------------|-------|-------|-------|---|--------|------|-----|-----|-------|------|
| TCGA-EI-6885 | ##### | ##### | #NUM! | 2 | #NULL! | READ | 14  | 0.0 | 141   | NA   |
| TCGA-AH-6643 | ##### | ##### | ##### | 2 | #NULL! | READ | 43  | 1.0 | 160   | NA   |
| TCGA-F5-6863 | ##### | ##### | ##### | 2 | #NULL! | READ | 12  | 1.0 | 105   | NA   |
| TCGA-AG-3600 | ##### | ##### | ##### | 2 | #NULL! | READ | 6   | 0.0 | 0     | #N/A |
| TCGA-EI-6883 | ##### | ##### | #NUM! | 2 | #NULL! | READ | 12  | 0.0 | 127   | NA   |
| TCGA-AG-3591 | ##### | ##### | ##### | 2 | #NULL! | READ | 34  | 0.0 | 116   | NA   |
| TCGA-AG-4021 | ##### | ##### | #NUM! | 2 | #NULL! | READ | 4   | 1.0 | 199   | NA   |
| TCGA-AG-3605 | ##### | ##### | ##### | 2 | #NULL! | READ | 1   | 0.0 | 16    | #N/A |
| TCGA-AG-3601 | ##### | ##### | ##### | 2 | #NULL! | READ | 0   | 0.0 | 0     | #N/A |
| TCGA-AG-A002 | ##### | ##### | ##### | 2 | #NULL! | READ | 21  | 0.0 | 17069 | #N/A |
| TCGA-AG-3582 | ##### | ##### | ##### | 2 | #NULL! | READ | 36  | 1.0 | 0     | #N/A |
| TCGA-F5-6814 | ##### | ##### | #NUM! | 2 | #NULL! | READ | 37  | 0.0 | 13465 | NA   |
| TCGA-DY-A1H8 | ##### | ##### | #NUM! | 2 | #NULL! | READ | 33  | 1.0 | 129   | NA   |
| TCGA-AG-3594 | ##### | ##### | ##### | 2 | #NULL! | READ | 2   | 1.0 | 18    | #N/A |
| TCGA-DY-A0XA | ##### | ##### | #NUM! | 2 | #NULL! | READ | 126 | 0.0 | 183   | NA   |
| TCGA-EI-6510 | ##### | ##### | ##### | 2 | #NULL! | READ | 18  | 0.0 | 165   | NA   |
| TCGA-CL-5917 | ##### | ##### | #NUM! | 2 | #NULL! | READ | 78  | 0.0 | 109   | NA   |
| TCGA-DY-A1DC | ##### | ##### | #NUM! | 2 | #NULL! | READ | 41  | 1.0 | 191   | NA   |
| TCGA-AG-3999 | ##### | ##### | ##### | 2 | #NULL! | READ | 28  | 0.0 | 0     | #N/A |
| TCGA-AG-A01J | ##### | ##### | ##### | 2 | #NULL! | READ | 1   | 0.0 | 138   | #N/A |
| TCGA-AG-3574 | ##### | ##### | ##### | 2 | #NULL! | READ | 36  | 1.0 | 22    | #N/A |
| TCGA-AG-A015 | ##### | ##### | ##### | 2 | #NULL! | READ | 36  | 0.0 | 137   | #N/A |
| TCGA-AG-3612 | ##### | ##### | ##### | 2 | #NULL! | READ | 20  | 0.0 | 0     | #N/A |
| TCGA-AF-2691 | ##### | ##### | ##### | 2 | #NULL! | READ | 43  | 0.0 | 96    | #N/A |
| TCGA-AG-3896 | ##### | ##### | ##### | 2 | #NULL! | READ | 1   | 0.0 | 161   | #N/A |
| TCGA-AG-3599 | ##### | ##### | ##### | 2 | #NULL! | READ | 12  | 0.0 | 31    | #N/A |
| TCGA-AH-6547 | ##### | ##### | ##### | 2 | #NULL! | READ | 3   | 1.0 | 13    | NA   |
| TCGA-AF-A56K | ##### | ##### | ##### | 2 | #NULL! | READ | 87  | 0.0 | 135   | NA   |
| TCGA-AG-3598 | ##### | ##### | ##### | 2 | #NULL! | READ | 50  | 0.0 | 30    | #N/A |
| TCGA-AG-A00C | ##### | ##### | ##### | 2 | #NULL! | READ | 6   | 0.0 | 188   | #N/A |
| TCGA-AF-2692 | ##### | ##### | ##### | 2 | #NULL! | READ | 14  | 0.0 | 46    | #N/A |
| TCGA-AF-6655 | ##### | ##### | ##### | 2 | #NULL! | READ | 20  | 0.0 | 99    | NA   |
| TCGA-AG-3901 | ##### | ##### | ##### | 2 | #NULL! | READ | 25  | 0.0 | 89    | #N/A |
| TCGA-DC-5337 | ##### | ##### | ##### | 2 | #NULL! | READ | 26  | 0.0 | 145   | NA   |
| TCGA-AF-3911 | ##### | ##### | ##### | 2 | #NULL! | READ | 38  | 0.0 | 129   | NA   |
| TCGA-AG-4007 | ##### | ##### | ##### | 2 | #NULL! | READ | 1   | 0.0 | 0     | #N/A |
| TCGA-AG-4005 | ##### | ##### | ##### | 2 | #NULL! | READ | 14  | 0.0 | 0     | #N/A |
| TCGA-AG-4015 | ##### | ##### | ##### | 2 | #NULL! | READ | 0   | 0.0 | 126   | #N/A |
| TCGA-DC-6154 | ##### | ##### | ##### | 2 | #NULL! | READ | 12  | 0.0 | 136   | NA   |
| TCGA-AG-3731 | ##### | ##### | ##### | 2 | #NULL! | READ | 37  | 0.0 | 205   | NA   |
| TCGA-EI-6881 | ##### | ##### | ##### | 2 | #NULL! | READ | 16  | 0.0 | 150   | NA   |
| TCGA-DC-4749 | ##### | ##### | ##### | 2 | #NULL! | READ | 25  | 0.0 | 106   | NA   |
| TCGA-AF-A56L | ##### | ##### | ##### | 2 | #NULL! | READ | 66  | 0.0 | 184   | NA   |
| TCGA-EI-6511 | ##### | ##### | ##### | 2 | #NULL! | READ | 16  | 0.0 | 110   | NA   |
| TCGA-AG-A023 | ##### | ##### | ##### | 2 | #NULL! | READ | 52  | 1.0 | 0     | #N/A |
| TCGA-AG-3890 | ##### | ##### | ##### | 2 | #NULL! | READ | 17  | 0.0 | 145   | #N/A |
| TCGA-AG-3593 | ##### | ##### | ##### | 2 | #NULL! | READ | 34  | 0.0 | 0     | #N/A |
| TCGA-AG-3586 | ##### | ##### | ##### | 2 | #NULL! | READ | 1   | 0.0 | 0     | #N/A |
| TCGA-CI-6621 | ##### | ##### | ##### | 2 | #NULL! | READ | 14  | 0.0 | 167   | NA   |
| TCGA-DC-4745 | ##### | ##### | ##### | 2 | #NULL! | READ | 21  | 0.0 | 100   | NA   |
| TCGA-AG-3887 | ##### | ##### | ##### | 2 | #NULL! | READ | 37  | 0.0 | 105   | #N/A |
| TCGA-AH-6544 | ##### | ##### | ##### | 2 | #NULL! | READ | 39  | 0.0 | 197   | NA   |
| TCGA-F5-6861 | ##### | ##### | ##### | 2 | #NULL! | READ | 38  | 0.0 | 134   | NA   |
| TCGA-AG-3580 | ##### | ##### | ##### | 2 | #NULL! | READ | 8   | 0.0 | 23    | #N/A |

|              |       |       |       |   |        |      |     |     |      |      |
|--------------|-------|-------|-------|---|--------|------|-----|-----|------|------|
| TCGA-EI-7004 | ##### | ##### | ##### | 2 | #NULL! | READ | 8   | 0.0 | 142  | NA   |
| TCGA-AF-2693 | ##### | ##### | ##### | 2 | #NULL! | READ | 38  | 0.0 | 137  | NA   |
| TCGA-EI-6507 | ##### | ##### | ##### | 2 | #NULL! | READ | 20  | 0.0 | 1431 | NA   |
| TCGA-AG-3909 | ##### | ##### | ##### | 2 | #NULL! | READ | 20  | 0.0 | 100  | #N/A |
| TCGA-AH-6549 | ##### | ##### | ##### | 2 | #NULL! | READ | 17  | 0.0 | 0    | NA   |
| TCGA-AG-A025 | ##### | ##### | ##### | 2 | #NULL! | READ | 50  | 0.0 | 0    | #N/A |
| TCGA-G5-6641 | ##### | ##### | ##### | 2 | #NULL! | READ | 26  | 0.0 | 135  | NA   |
| TCGA-EI-6506 | ##### | ##### | ##### | 2 | #NULL! | READ | 21  | 0.0 | 184  | NA   |
| TCGA-AG-A036 | ##### | ##### | ##### | 2 | #NULL! | READ | 117 | 0.0 | 0    | #N/A |
| TCGA-AF-A56N | ##### | ##### | ##### | 2 | #NULL! | READ | 12  | 0.0 | 219  | NA   |
| TCGA-AG-3592 | ##### | ##### | ##### | 2 | #NULL! | READ | 34  | 0.0 | 375  | NA   |
| TCGA-AG-3732 | ##### | ##### | ##### | 2 | #NULL! | READ | 33  | 0.0 | 118  | NA   |
| TCGA-AF-3400 | ##### | ##### | ##### | 2 | #NULL! | READ | 34  | 0.0 | 53   | #N/A |
| TCGA-EI-6508 | ##### | ##### | ##### | 2 | #NULL! | READ | 21  | 0.0 | 147  | NA   |
| TCGA-AG-A00Y | ##### | ##### | ##### | 2 | #NULL! | READ | 23  | 0.0 | 549  | #N/A |
| TCGA-DC-5869 | ##### | ##### | ##### | 2 | #NULL! | READ | 31  | 0.0 | 118  | NA   |
| TCGA-DC-6681 | ##### | ##### | ##### | 2 | #NULL! | READ | 26  | 0.0 | 109  | NA   |
| TCGA-CI-6620 | ##### | ##### | ##### | 2 | #NULL! | READ | 33  | 0.0 | 97   | NA   |
| TCGA-AG-3575 | ##### | ##### | ##### | 4 | #NULL! | READ | 12  | 0.0 | 26   | #N/A |
| TCGA-DT-5265 | ##### | ##### | ##### | 4 | #NULL! | READ | 13  | 0.0 | 122  | NA   |
| TCGA-AG-3885 | ##### | ##### | ##### | 4 | #NULL! | READ | 18  | 0.0 | 130  | #N/A |
| TCGA-AG-3728 | ##### | ##### | ##### | 4 | #NULL! | READ | 30  | 0.0 | 0    | #N/A |
| TCGA-AG-A011 | ##### | ##### | ##### | 4 | #NULL! | READ | 37  | 0.0 | 148  | #N/A |
| TCGA-AG-3881 | ##### | ##### | ##### | 4 | #NULL! | READ | 19  | 0.0 | 184  | #N/A |
| TCGA-DC-6155 | ##### | ##### | ##### | 4 | #NULL! | READ | 14  | 0.0 | 83   | NA   |
| TCGA-AF-6672 | ##### | ##### | ##### | 4 | #NULL! | READ | 25  | 0.0 | 119  | NA   |
| TCGA-AG-3878 | ##### | ##### | ##### | 4 | #NULL! | READ | 1   | 0.0 | 133  | #N/A |
| TCGA-AG-3581 | ##### | ##### | ##### | 4 | #NULL! | READ | 7   | 0.0 | 22   | #N/A |
| TCGA-BM-6198 | ##### | ##### | ##### | 4 | #NULL! | READ | 21  | 0.0 | 0    | NA   |
| TCGA-AG-4022 | ##### | ##### | ##### | 4 | #NULL! | READ | 46  | 0.0 | 123  | NA   |
| TCGA-F5-6812 | ##### | ##### | ##### | 4 | #NULL! | READ | 36  | 0.0 | 122  | NA   |
| TCGA-F5-6864 | ##### | ##### | ##### | 4 | #NULL! | READ | 12  | 0.0 | 197  | NA   |
| TCGA-G5-6572 | ##### | ##### | ##### | 4 | #NULL! | READ | 47  | 1.0 | 0    | NA   |
| TCGA-F5-6571 | ##### | ##### | ##### | 4 | #NULL! | READ | 42  | 0.0 | 113  | NA   |
| TCGA-AG-A014 | ##### | ##### | ##### | 4 | #NULL! | READ | 16  | 0.0 | 0    | #N/A |
| TCGA-AG-3882 | ##### | ##### | ##### | 4 | #NULL! | READ | 20  | 0.0 | 110  | #N/A |
| TCGA-AG-A026 | ##### | ##### | ##### | 4 | #NULL! | READ | 2   | 1.0 | 301  | #N/A |
| TCGA-F5-6702 | ##### | ##### | ##### | 4 | #NULL! | READ | 29  | 1.0 | 100  | NA   |
| TCGA-AG-3902 | ##### | ##### | ##### | 4 | #NULL! | READ | 32  | 0.0 | 184  | 16   |
| TCGA-AG-3609 | ##### | ##### | ##### | 4 | #NULL! | READ | 20  | 0.0 | 0    | #N/A |
| TCGA-AG-4008 | ##### | ##### | ##### | 4 | #NULL! | READ | 17  | 0.0 | 124  | #N/A |
| TCGA-AF-2687 | ##### | ##### | ##### | 4 | #NULL! | READ | ### | 0.0 | 141  | NA   |
| TCGA-AF-2690 | ##### | ##### | ##### | 4 | #NULL! | READ | 17  | 1.0 | 107  | NA   |
| TCGA-AG-4001 | ##### | ##### | ##### | 4 | #NULL! | READ | 36  | 0.0 | 159  | #N/A |
| TCGA-DC-6158 | ##### | ##### | ##### | 4 | #NULL! | READ | 11  | 1.0 | 143  | NA   |
| TCGA-EI-6884 | ##### | ##### | ##### | 4 | #NULL! | READ | 11  | 0.0 | 158  | NA   |
| TCGA-DC-6156 | ##### | ##### | ##### | 4 | #NULL! | READ | 31  | 0.0 | 0    | NA   |
| TCGA-CI-6619 | ##### | ##### | ##### | 4 | #NULL! | READ | 6   | 0.0 | 115  | NA   |
| TCGA-EI-6514 | ##### | #NUM! | ##### | 4 | #NULL! | READ | 16  | 0.0 | 155  | NA   |
| TCGA-AG-3584 | ##### | ##### | ##### | 4 | #NULL! | READ | 24  | 1.0 | 28   | #N/A |
| TCGA-F5-6465 | ##### | ##### | ##### | 4 | #NULL! | READ | 49  | 0.0 | 139  | NA   |
| TCGA-AF-6136 | ##### | ##### | ##### | 4 | #NULL! | READ | 24  | 0.0 | 176  | NA   |
| TCGA-AF-4110 | ##### | ##### | ##### | 4 | #NULL! | READ | 30  | 0.0 | 135  | NA   |
| TCGA-AG-3892 | ##### | ##### | ##### | 4 | #NULL! | READ | 13  | 0.0 | 3607 | #N/A |

|              |        |        |        |        |        |      |       |     |      |      |
|--------------|--------|--------|--------|--------|--------|------|-------|-----|------|------|
| TCGA-AG-3587 | #####  | #####  | #####  | 4      | #NULL! | READ | 46    | 0.0 | 0    | #N/A |
| TCGA-F5-6464 | #####  | #####  | #####  | 4      | #NULL! | READ | 10    | 1.0 | 130  | NA   |
| TCGA-EI-6513 | #####  | #####  | #####  | 4      | #NULL! | READ | 16    | 0.0 | 206  | NA   |
| TCGA-AG-3608 | #####  | #####  | #####  | 4      | #NULL! | READ | 16    | 0.0 | 0    | #N/A |
| TCGA-AG-3883 | #####  | #####  | #####  | 4      | #NULL! | READ | 1     | 0.0 | 178  | #N/A |
| TCGA-AG-A032 | #####  | #####  | #####  | 4      | #NULL! | READ | 38    | 0.0 | 113  | #N/A |
| TCGA-AG-3727 | #####  | #####  | #####  | 4      | #NULL! | READ | 1     | 0.0 | 116  | #N/A |
| TCGA-AG-3893 | #####  | #####  | #####  | 4      | #NULL! | READ | 35    | 0.0 | 176  | #N/A |
| TCGA-AH-6644 | #####  | #####  | #####  | 4      | #NULL! | READ | 28    | 0.0 | 166  | NA   |
| TCGA-AG-3894 | #####  | #####  | #####  | 4      | #NULL! | READ | 14    | 0.0 | 143  | #N/A |
| TCGA-AG-3602 | #####  | #####  | #####  | 4      | #NULL! | READ | 0     | 0.0 | 19   | #N/A |
| TCGA-AG-A00H | #####  | #####  | #####  | 4      | #NULL! | READ | 26    | 0.0 | 0    | #N/A |
| TCGA-AG-3742 | #####  | #####  | #####  | 4      | #NULL! | READ | 1     | 0.0 | 200  | NA   |
| TCGA-AG-A01N | #####  | #####  | #####  | 4      | #NULL! | READ | 31    | 0.0 | 150  | #N/A |
| TCGA-AG-A02G | #####  | #####  | #####  | 4      | #NULL! | READ | 39    | 1.0 | 0    | #N/A |
| TCGA-L5-A43M | #NUM!  | #NUM!  | #NUM!  | #NULL! | #NULL! | ESCA | 8.94  | 0   | 42   | NA   |
| TCGA-L5-A4OR | #NUM!  | #NUM!  | #NUM!  | #NULL! | #NULL! | ESCA | 3.15  | 1   | 153  | NA   |
| TCGA-L5-A43I | #NUM!  | #NUM!  | #NUM!  | #NULL! | #NULL! | ESCA | 18.3  | 1   | 176  | NA   |
| TCGA-L5-A4OQ | #NUM!  | #NUM!  | #NUM!  | #NULL! | #NULL! | ESCA | 1.38  | 1   | 55   | NA   |
| TCGA-L5-A43H | #NUM!  | #NUM!  | #NUM!  | #NULL! | #NULL! | ESCA | 0.3   | 1   | 82   | NA   |
| TCGA-R6-A6Y2 | #NUM!  | #NUM!  | #NUM!  | #NULL! | #NULL! | ESCA | 9.3   | 1   | 95   | NA   |
| TCGA-R6-A6L6 | #NUM!  | #NUM!  | #NUM!  | #NULL! | #NULL! | ESCA | 7.03  | 1   | 111  | NA   |
| TCGA-L5-A4OF | #NUM!  | #NUM!  | #NUM!  | #NULL! | #NULL! | ESCA | 26.3  | 1   | 79   | NA   |
| TCGA-LN-A49V | #NUM!  | #NUM!  | #NUM!  | #NULL! | #NULL! | ESCA | 12.6  | 0   | 94   | NA   |
| TCGA-LN-A49R | #NUM!  | #NUM!  | #NUM!  | #NULL! | #NULL! | ESCA | 13.4  | 0   | 108  | NA   |
| TCGA-IG-A3Y9 | #NUM!  | #NUM!  | #NUM!  | #NULL! | #NULL! | ESCA | 0.85  | 1   | 207  | NA   |
| TCGA-LN-A49K | #NUM!  | #NUM!  | #NUM!  | #NULL! | #NULL! | ESCA | 5.91  | 1   | 78   | NA   |
| TCGA-VR-AA7B | #NUM!  | #NUM!  | #NUM!  | #NULL! | #NULL! | ESCA | 11.2  | 0   | 165  | NA   |
| TCGA-LN-A4A6 | #NUM!  | #NUM!  | #NUM!  | #NULL! | #NULL! | ESCA | 12.8  | 0   | 103  | NA   |
| TCGA-XP-A8T7 | #NUM!  | #NUM!  | #NUM!  | #NULL! | #NULL! | ESCA | 41.2  | 0   | #N/A | #N/A |
| TCGA-VR-AA7D | #NUM!  | #NUM!  | #NUM!  | #NULL! | #NULL! | ESCA | 9.17  | 1   | 96   | NA   |
| TCGA-Q9-A6FU | #NUM!  | #NUM!  | #NUM!  | #NULL! | #NULL! | ESCA | 5.16  | 1   | 143  | NA   |
| TCGA-LN-A4MF | #NUM!  | #NUM!  | #NUM!  | #NULL! | #NULL! | ESCA | 13.2  | 0   | 134  | NA   |
| TCGA-IG-A4QT | #NUM!  | #NUM!  | #NUM!  | #NULL! | #NULL! | ESCA | 9.3   | 1   | 4    | NA   |
| TCGA-LN-A49N | #NUM!  | #NUM!  | #NUM!  | #NULL! | #NULL! | ESCA | 12.4  | 0   | 52   | NA   |
| TCGA-LN-A49L | #NUM!  | #NUM!  | #NUM!  | #NULL! | #NULL! | ESCA | 10.5  | 1   | 152  | NA   |
| TCGA-X8-AAAR | #NUM!  | #NUM!  | #NUM!  | #NULL! | #NULL! | ESCA | 18.2  | 0   | 113  | NA   |
| TCGA-LN-A4A2 | #NUM!  | #NUM!  | #NUM!  | #NULL! | #NULL! | ESCA | 12.5  | 0   | 125  | NA   |
| TCGA-JY-A6F8 | #NUM!  | #NUM!  | #NUM!  | #NULL! | #NULL! | ESCA | 122   | 0   | 95   | NA   |
| TCGA-CN-A640 | #NULL! | #NULL! | #NULL! | #NULL! | #NULL! | HNSC | 00000 | 1.0 | #N/A | #N/A |
| TCGA-CN-A63Y | #NULL! | #NULL! | #NULL! | #NULL! | #NULL! | HNSC | 99999 | 0.0 | #N/A | #N/A |
| TCGA-MT-A67G | #NULL! | #NULL! | #NULL! | #NULL! | #NULL! | HNSC | 6.24  | 0.0 | #N/A | #N/A |
| TCGA-H7-A6C5 | #NULL! | #NULL! | #NULL! | #NULL! | #NULL! | HNSC | 21.09 | 0.0 | #N/A | #N/A |
| TCGA-IQ-A61K | #NULL! | #NULL! | #NULL! | #NULL! | #NULL! | HNSC | 5.29  | 1.0 | #N/A | #N/A |
| TCGA-IQ-A61L | #NULL! | #NULL! | #NULL! | #NULL! | #NULL! | HNSC | 13.67 | 0.0 | #N/A | #N/A |
| TCGA-BA-A6DF | #NULL! | #NULL! | #NULL! | #NULL! | #NULL! | HNSC | 7.82  | 1.0 | #N/A | #N/A |
| TCGA-CQ-7064 | #NULL! | #NULL! | #NULL! | #NULL! | #NULL! | HNSC | 99999 | 0.0 | #N/A | #N/A |
| TCGA-OR-A5KE | #NULL! | #NULL! | #NULL! | #NULL! | #NULL! | ACC  | 24.34 | 0   | #N/A | #N/A |
| TCGA-OR-A5JU | #NULL! | #NULL! | #NULL! | #NULL! | #NULL! | ACC  | 9.49  | 1   | #N/A | #N/A |
| TCGA-OR-A5KP | #NULL! | #NULL! | #NULL! | #NULL! | #NULL! | ACC  | 91.23 | 0   | #N/A | #N/A |
| TCGA-PK-A5HC | #NULL! | #NULL! | #NULL! | #NULL! | #NULL! | ACC  | 22.31 | 0   | #N/A | #N/A |
| TCGA-OR-A5LI | #NULL! | #NULL! | #NULL! | #NULL! | #NULL! | ACC  | 14.32 | 1   | #N/A | #N/A |
| TCGA-OR-A5L1 | #NULL! | #NULL! | #NULL! | #NULL! | #NULL! | ACC  | 58.51 | 0   | #N/A | #N/A |
| TCGA-OR-A5J4 | #NULL! | #NULL! | #NULL! | #NULL! | #NULL! | ACC  | 13.90 | 1   | #N/A | #N/A |

|              |        |        |        |        |        |      |       |     |      |      |
|--------------|--------|--------|--------|--------|--------|------|-------|-----|------|------|
| TCGA-OR-A5KS | #NULL! | #NULL! | #NULL! | #NULL! | #NULL! | ACC  | 83.74 | 0   | #N/A | #N/A |
| TCGA-OR-A5JH | #NULL! | #NULL! | #NULL! | #NULL! | #NULL! | ACC  | 69.32 | 0   | #N/A | #N/A |
| TCGA-OR-A5KC | #NULL! | #NULL! | #NULL! | #NULL! | #NULL! | ACC  | 87.94 | 0   | #N/A | #N/A |
| TCGA-OR-A5L2 | #NULL! | #NULL! | #NULL! | #NULL! | #NULL! | ACC  | 60.84 | 1   | #N/A | #N/A |
| TCGA-OR-A5LF | #NULL! | #NULL! | #NULL! | #NULL! | #NULL! | ACC  | 14.62 | 1   | #N/A | #N/A |
| TCGA-P6-A5OH | #NULL! | #NULL! | #NULL! | #NULL! | #NULL! | ACC  | 0.00  | 1   | #N/A | #N/A |
| TCGA-HC-7741 | #NULL! | #NULL! | #NULL! | #NULL! | #NULL! | PRAD | 89.52 | 0.0 | #N/A | #N/A |
| TCGA-HC-8212 | #NULL! | #NULL! | #NULL! | #NULL! | #NULL! | PRAD | 71.58 | 0.0 | #N/A | #N/A |
| TCGA-KC-A4BC | #NULL! | #NULL! | #NULL! | #NULL! | #NULL! | PRAD | 19.94 | 0.0 | #N/A | #N/A |
| TCGA-PJ-A8JU | #NULL! | #NULL! | #NULL! | #NULL! | #NULL! | KIRP | 12    | 0.0 | NA   | #N/A |



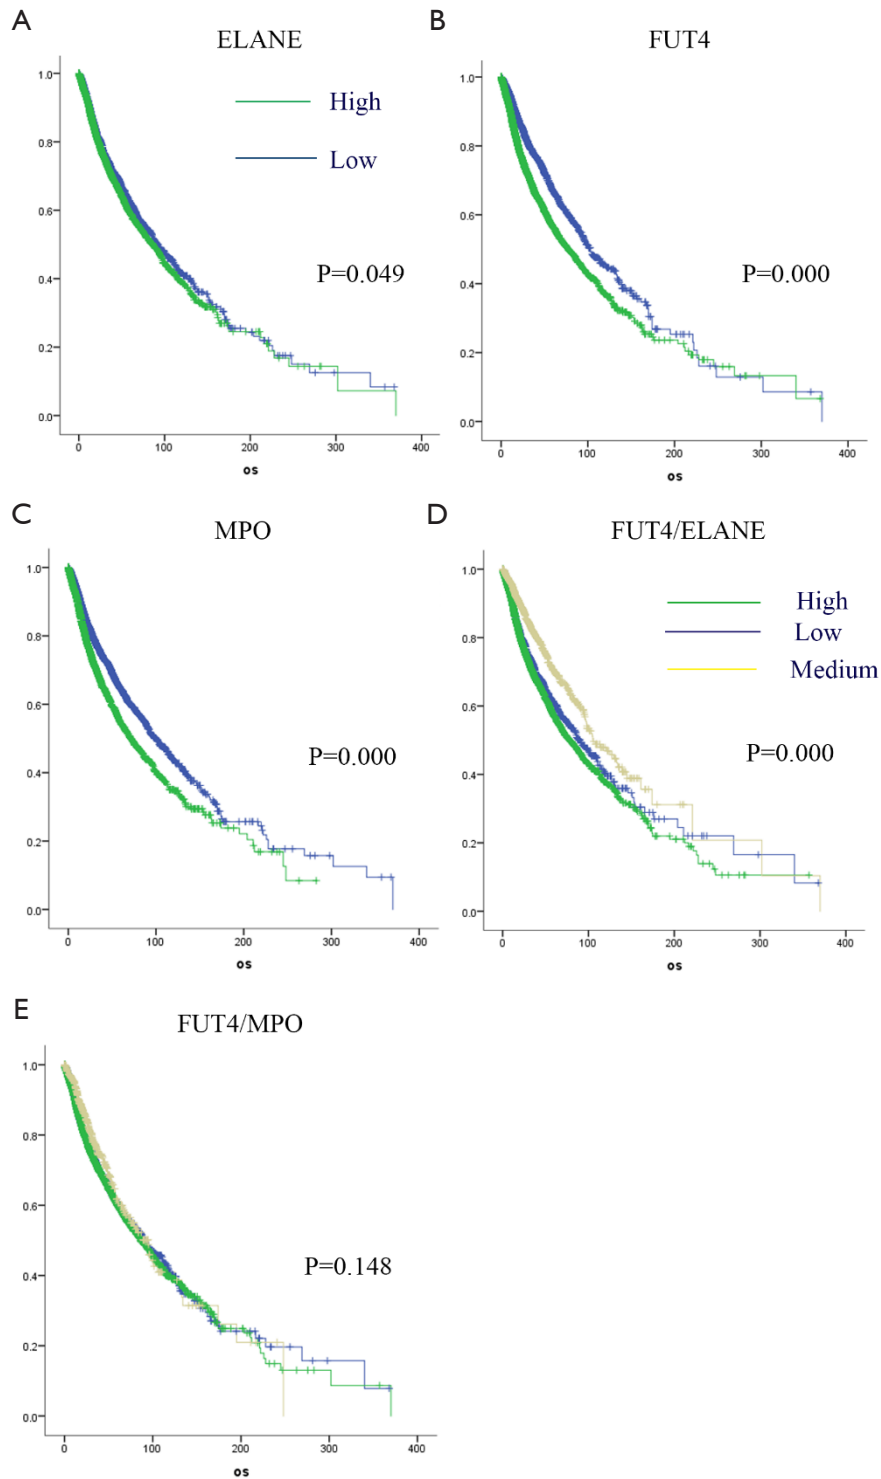

**Figure S1** Kaplan-Meier analysis of FUT4/ELANE/MPO expression and immunophenotyping in all patient samples. Kaplan-Meier analysis of FUT4 expression in all patient samples. (A) Kaplan-Meier analysis of ELANE expression in all patient samples. (B) Kaplan-Meier analysis of MPO expression in all patient samples. (C) Kaplan-Meier analysis of immunophenotyping according to FUT4/ELANE in all patient samples. (D) Kaplan-Meier analysis of immunophenotyping according to FUT4/MPO in all patient samples. (E) FUT4, fucosyltransferase 4; ELANE, elastase, neutrophil expressed; MPO, myeloperoxidase.

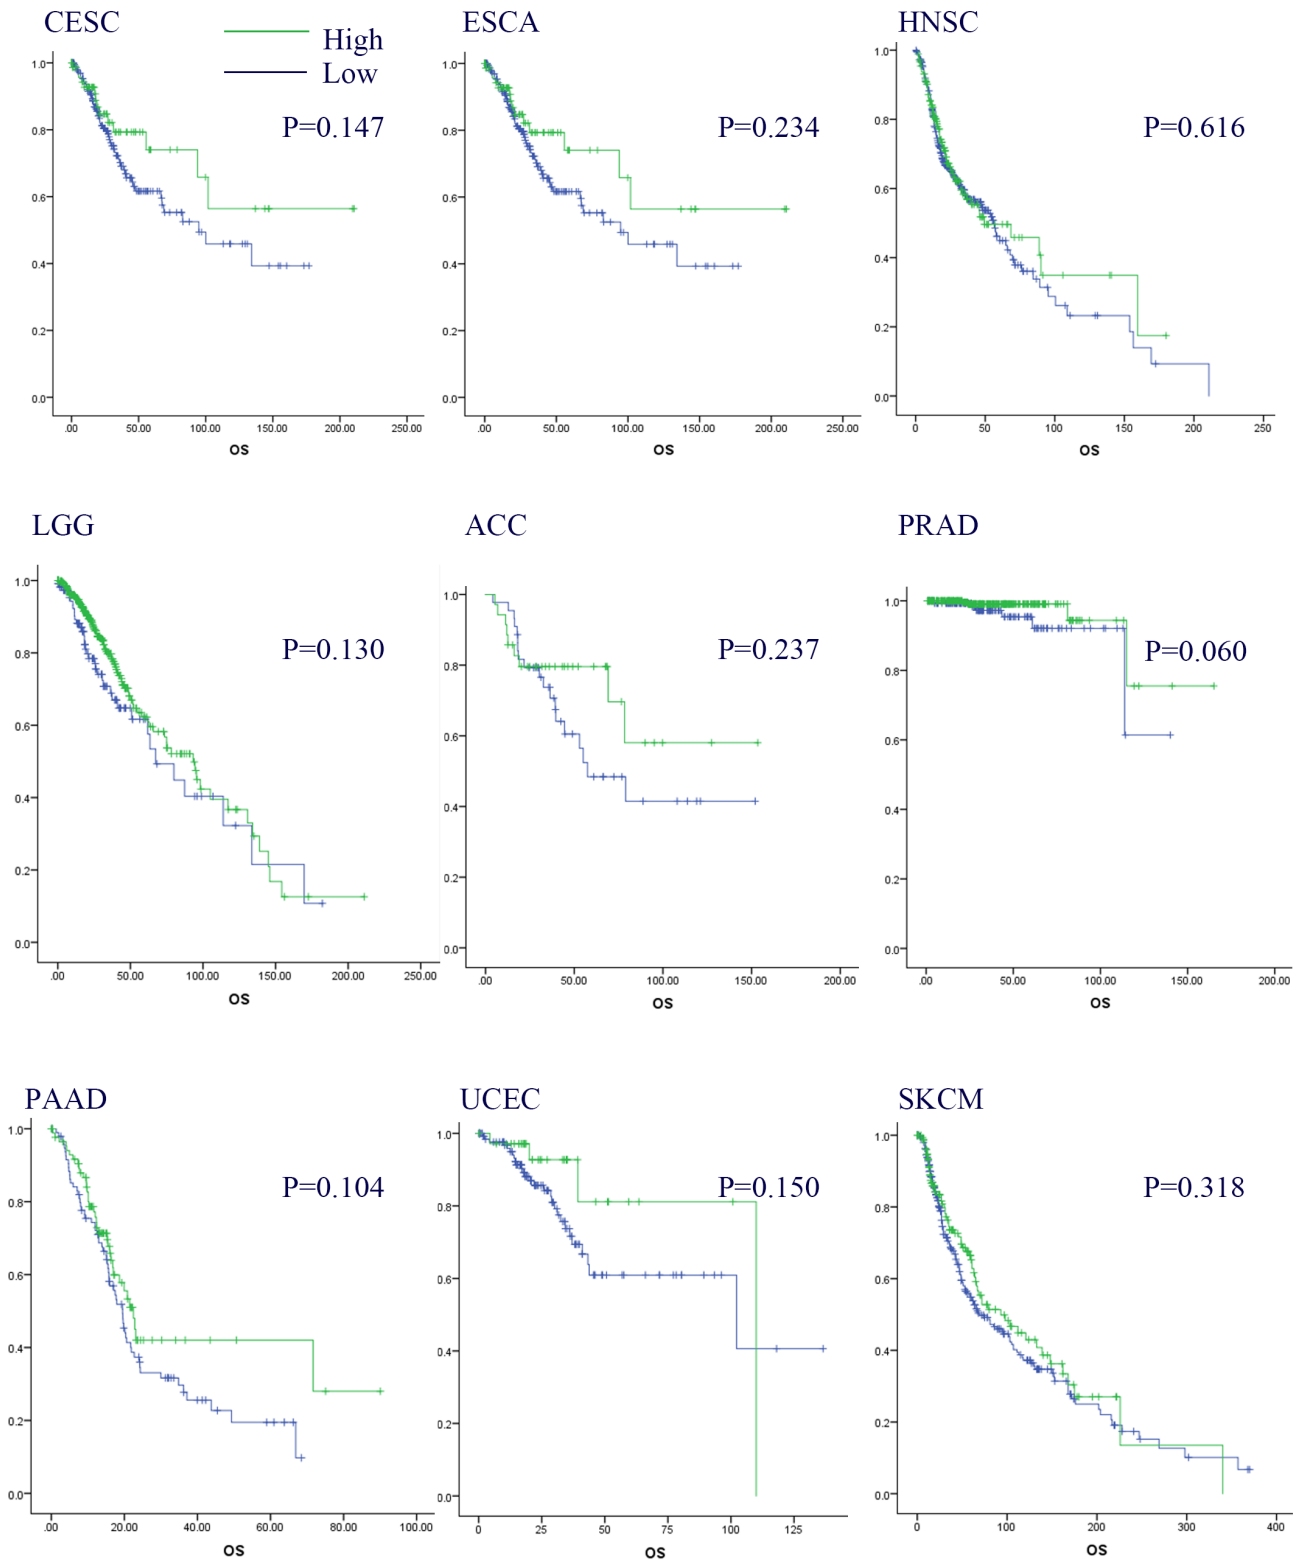

**Figure S2** Survival analysis of tumors in tumors with high expression of ELANE. High expression of ELANE have good tendency of prognosis in CESC, ESCA, HNSC, LGG, ACC, PRAD, PAAD, UCEC, SKCM. CESC, cervical cancer; ESCA, esophageal carcinoma; HNSC, head and neck squamous cell carcinoma; LGG, brain lower grade glioma; ACC, adrenocortical carcinoma; PRAD, prostate adenocarcinoma; PAAD, pancreatic adenocarcinoma; UCEC, uterine corpus endometrial carcinoma; SKCM, skin cutaneous melanoma; CESC, cervical cancer; ELANE, elastase, neutrophil expressed.

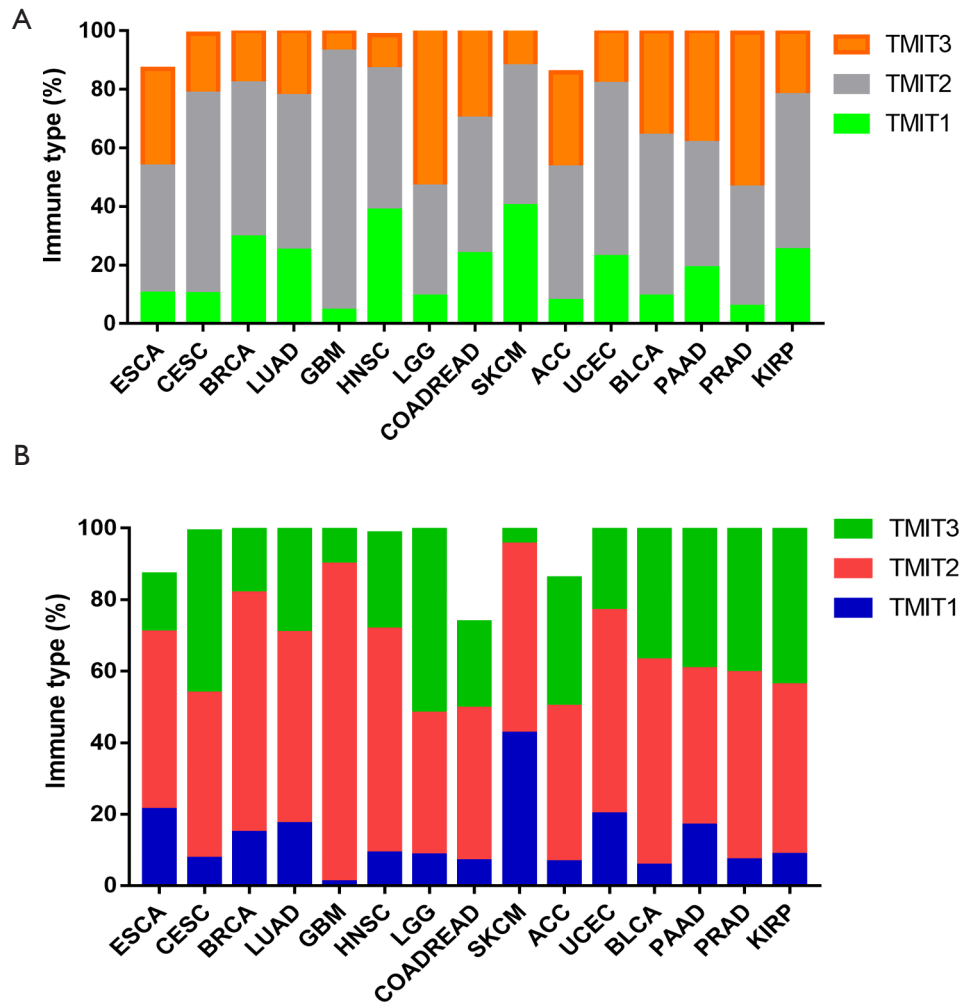

**Figure S3** The distributions of TMITs groups for 15 cancer types. The distributions of TMITs groups according to FUT4/ELANE for 15 cancer types. (A) The distributions of TMITs groups according to FUT4/MPO for 15 cancer types. (B) FUT4, fucosyltransferase 4; ELANE, elastase, neutrophil expressed; MPO, myeloperoxidase.

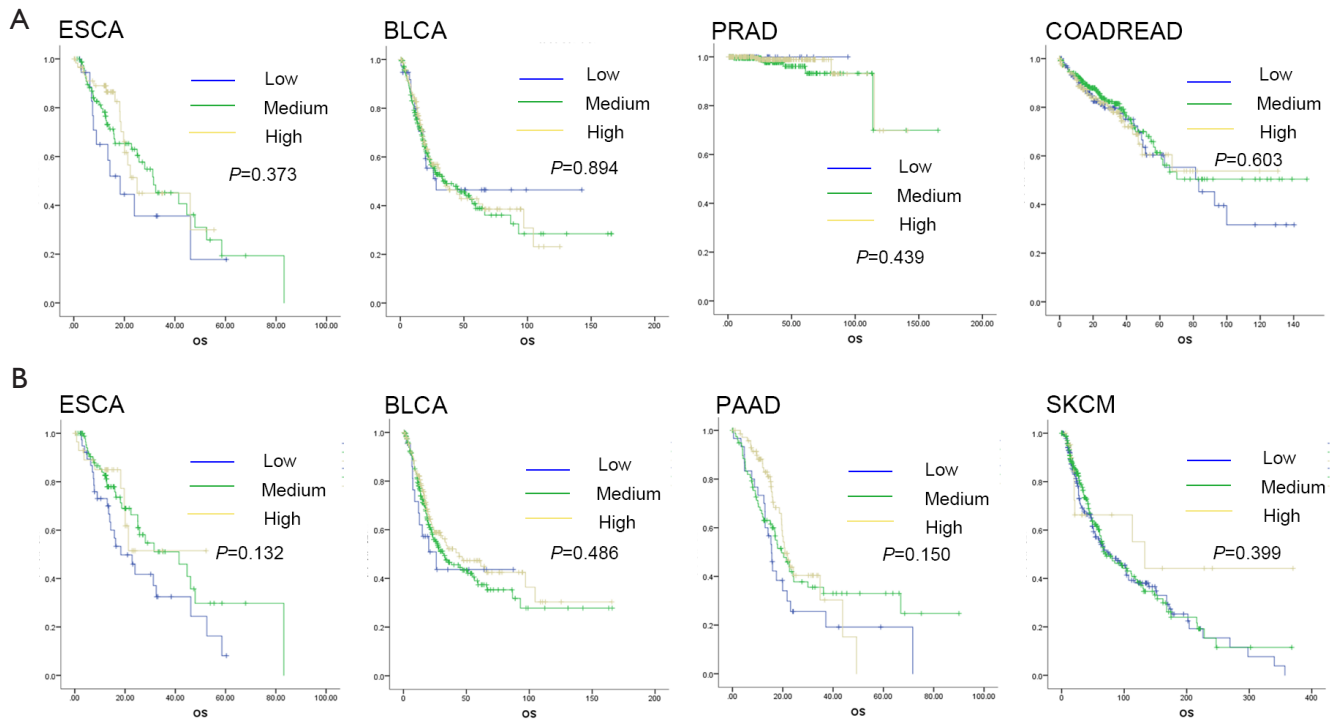

**Figure S4** Survival analysis of TMIT3 in all kinds of tumors stratified by immunophenotyping. TMIT3 of FUT4 /ELANE groups have good prognosis tendency in ESCA, BLCA, PRAD, COADREAD (A). TMIT3 of FUT4/ MPO groups have good prognosis tendency in ESCA, BLCA, PAAD, SKCM (B). ESCA, esophageal carcinoma; BLCA, bladder urothelial carcinoma; PRAD, prostate adenocarcinoma; COADREAD, colorectal and rectal cancer; PAAD, pancreatic adenocarcinoma; SKCM, skin cutaneous melanoma; FUT4, fucosyltransferase 4; ELANE, elastase, neutrophil expressed; MPO, myeloperoxidase.

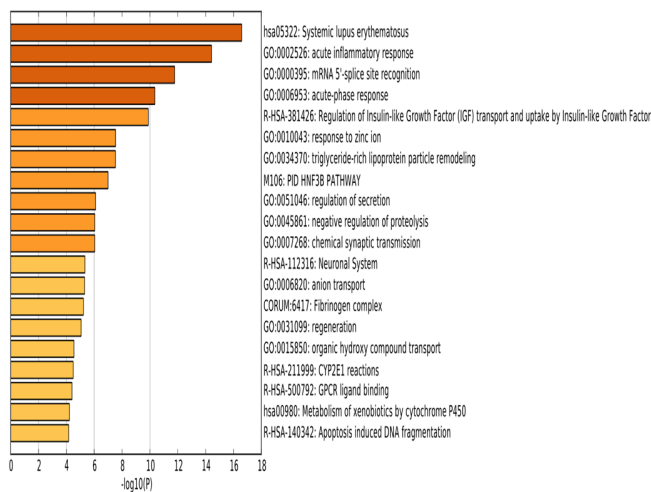

### BRCA

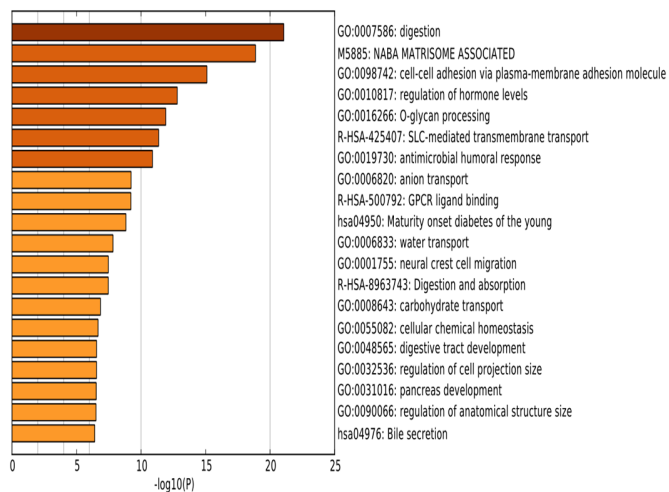

### CESC

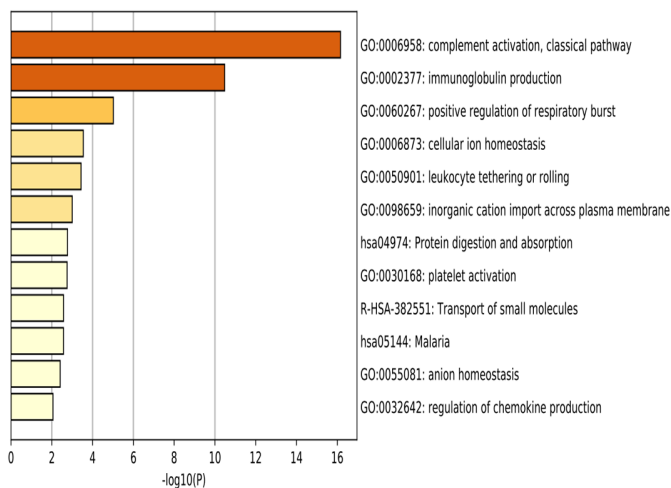

### ESCA

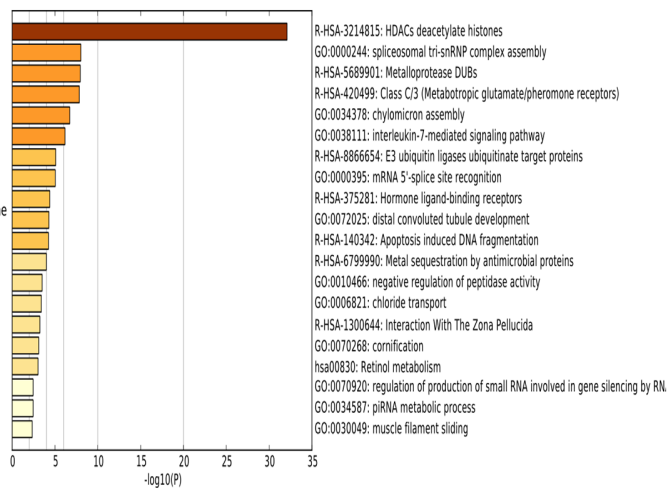

### LUAD

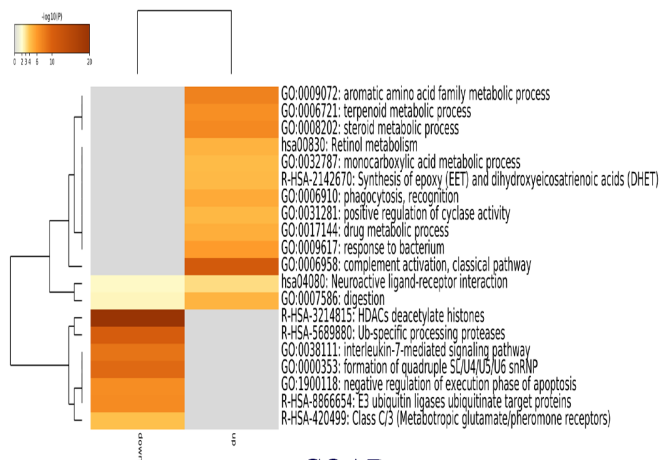

### COAD

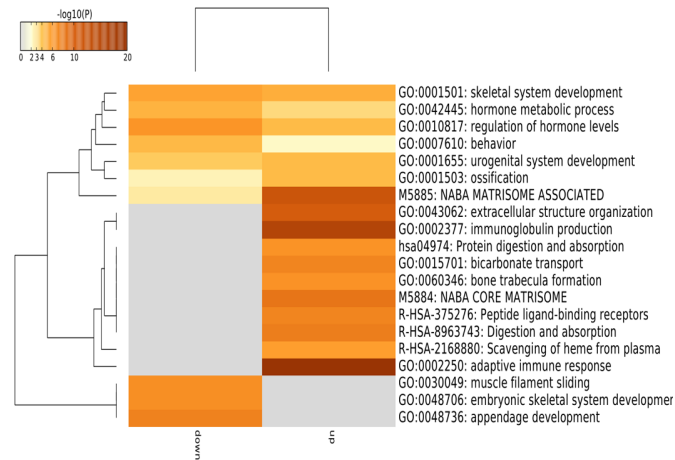

### READ

**Figure S5** Molecular features analyses of tumors. Metascape analysis showing clusters with their representative enriched biological processes in the up-regulated and down-regulated gene list in tumors.

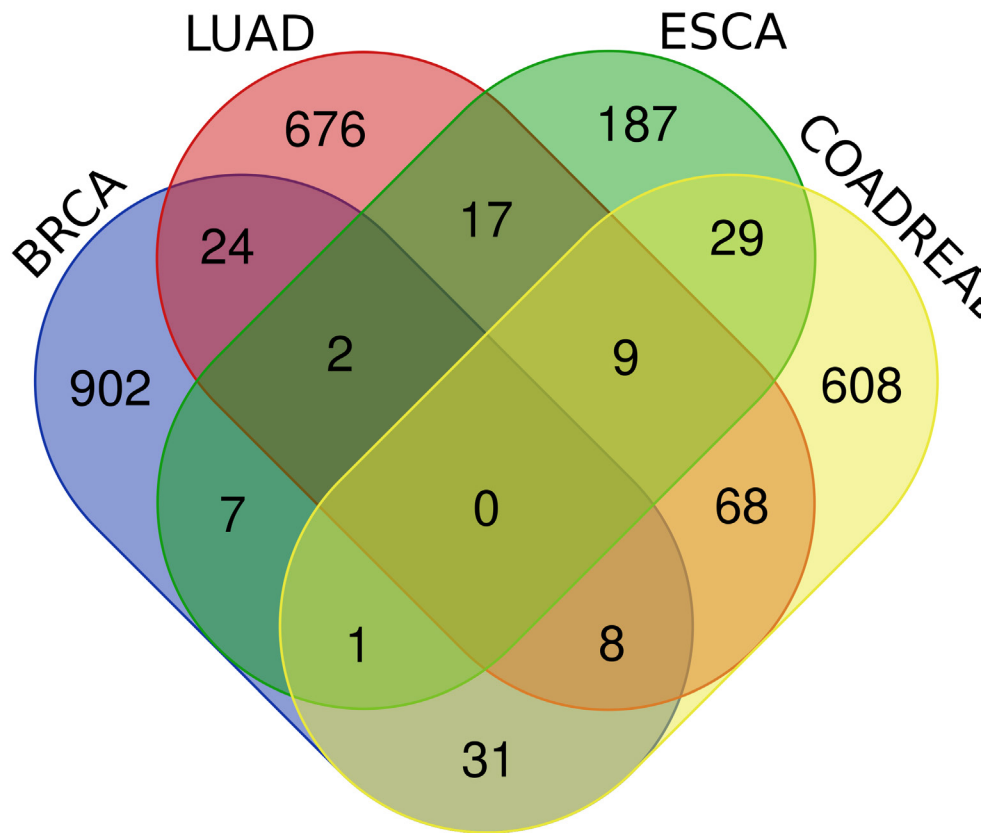

**Figure S6** The common gene for the highly expressed genes in tumors stratified by ELANE expression. ELANE, elastase, neutrophil expressed.
